# Supplementary material for: Mating Leads to a Decline in the Diversity of Symbiotic Microbiomes and Promiscuity Increased Pathogen Abundance in a Moth
Source: Front Microbiol. 2022 May 12;13:878856. doi: 10.3389/fmicb.2022.878856 (PMC9133953; doi:10.3389/fmicb.2022.878856)
Supplement: Supplementary file 1 [file Data_Sheet_1.xlsx]

## Sheet: Table S1
	Table S1 Summary of the quality of all samples’ sequencing data
Female mating type	Sample Name	Raw PE(#)	Combined(#)	Qualified(#)	Nochime(#)	Base(nt)	AvgLen(nt)	Q20	Q30	GC%	Effective%
Single	1 mating 1 day.1	106195	92251	86971	69632	29818082	428	96.67	90.7	55.32	65.57
Single	1 mating 1 day.2	111612	102899	98554	69688	29832209	428	97	91.43	55.5	62.44
Single	1 mating 1 day.3	107649	98818	94394	65717	28106007	428	96.9	91.23	55.47	61.05
Single	1 mating 2 days.1	97936	87452	83367	61249	26074875	426	96.95	91.27	55.21	62.54
Single	1 mating 2 days.2	105297	97393	93262	62661	26691459	426	96.97	91.31	55.32	59.51
Single	1 mating 2 days.3	105241	98032	94101	63334	26995817	426	97.14	91.77	55.3	60.18
Single	1 mating 3 days.1	105484	94277	88913	67524	28738341	426	96.8	91.02	54.76	64.01
Single	1 mating 3 days.2	101227	87217	83599	65604	27837320	424	97.24	91.98	54.82	64.81
Single	1 mating 3 days.3	96816	86302	83065	60250	25607940	425	97.5	92.49	55.06	62.23
Multiple	2 matings 2 days.1	107584	98661	94053	67472	28855431	428	97.13	91.76	54.58	62.72
Multiple	2 matings 2 days.2	107598	99952	95837	68188	29179043	428	97.26	92.06	54.96	63.37
Multiple	2 matings 2 days.3	108867	101786	97721	65334	27945857	428	97.08	91.72	55.01	60.01
Multiple	2 matings 3 days.1	107901	93750	89204	66784	28529422	427	97.37	92.2	54.76	61.89
Multiple	2 matings 3 days.2	100907	92547	88271	68004	29069215	427	97.03	91.48	55.39	67.39
Multiple	2 matings 3 days.3	101454	93299	89011	69146	29513753	427	97.06	91.56	55.36	68.16
Multiple	3 matings 3 days.1	104699	91291	87181	64407	27371432	425	97.53	92.56	54.81	61.52
Multiple	3 matings 3 days.2	99757	83836	78666	61610	26162069	425	96.6	90.62	54.83	61.76
Multiple	3 matings 3 days.3	99784	93501	89834	63870	27191959	426	97.35	92.26	54.98	64.01
Repeated	2 matings 2 days.1	107058	94695	90946	63380	27160982	429	96.82	90.82	55.7	59.2
Repeated	2 matings 2 days.2	106574	92253	87629	63583	27199864	428	96.77	90.98	55.35	59.66
Repeated	2 matings 2 days.3	104206	95020	90250	62226	26600484	427	96.83	91.07	55.24	59.71
Repeated	2 matings 3 days.1	108866	95437	91333	66600	28453993	427	97.33	92.17	55.26	61.18
Repeated	2 matings 3 days.2	110691	102263	97940	68162	29152200	428	97.05	91.58	55.12	61.58
Repeated	2 matings 3 days.3	104389	96351	92454	68614	29329613	427	97.23	91.96	55.4	65.73
Repeated	3 matings 3 days.1	100015	85463	80398	61781	26340119	426	96.71	90.78	54.94	61.77
Repeated	3 matings 3 days.2	110249	102281	98240	69795	29806637	427	97.13	91.67	55.38	63.31
Repeated	3 matings 3 days.3	112335	105386	101380	68931	29425867	427	97.34	92.21	55.37	61.36
Virgin	0 mating 1 day.1	100916	91327	86386	64647	27588639	427	97.11	91.8	54.49	64.06
Virgin	0 mating 1 day.2	102754	95080	90739	64239	27397073	426	97.12	91.76	54.9	62.52
Virgin	0 mating 1 day.3	113031	102151	96134	68863	29388878	427	96.8	91.06	54.84	60.92
Virgin	0 mating 2 days.1	101608	93068	88596	64389	27528522	428	97.08	91.72	54.64	63.37
Virgin	0 mating 2 days.2	96109	81601	76709	60426	25747343	426	96.62	90.73	54.11	62.87
Virgin	0 mating 2 days.3	112508	104090	99806	69202	29620293	428	97.03	91.55	54.81	61.51
Virgin	0 mating 3 days.1	98981	89590	85364	62201	26571466	427	97.06	91.59	54.82	62.84
Virgin	0 mating 3 days.2	94895	87851	83963	60588	25893702	427	97.29	92.13	55.18	63.85
Virgin	0 mating 3 days.3	104418	97213	92995	63855	27311054	428	97	91.55	55.23	61.15

## Sheet: Table S2
Table S2 OUT relative abundance of all samples
	Single	Single	Single	Single	Single	Single	Single	Single	Single	Multiple	Multiple	Multiple	Multiple	Multiple	Multiple	Multiple	Multiple	Multiple	Repeated	Repeated	Repeated	Repeated	Repeated	Repeated	Repeated	Repeated	Repeated	Virgin	Virgin	Virgin	Virgin	Virgin	Virgin	Virgin	Virgin	Virgin
Taxonomy	1 mating 1 day.1	1 mating 1 day.2	1 mating 1 day.3	1 mating 2 days.1	1 mating 2 days.2	1 mating 2 days.3	1 mating 3 days.1	1 mating 3 days.2	1 mating 3 days.3	2 matings 2 days.1	2 matings 2 days.2	2 matings 2 days.3	2 matings 3 days.1	2 matings 3 days.2	2 matings 3 days.3	3 matings 3 days.1	3 matings 3 days.2	3 matings 3 days.3	2 matings 2 days.1	2 matings 2 days.2	2 matings 2 days.3	2 matings 3 days.1	2 matings 3 days.2	2 matings 3 days.3	3 matings 3 days.1	3 matings 3 days.2	3 matings 3 days.3	0 mating 1 day.1	0 mating 1 day.2	0 mating 1 day.3	0 mating 2 days.1	0 mating 2 days.2	0 mating 2 days.3	0 mating 3 days.1	0 mating 3 days.2	0 mating 3 days.3	Tax_detail
OTU_1	0.394396	0.46105	0.447381	0.392147	0.429354	0.421508	0.530372	0.620685	0.676111	0.336286	0.451252	0.47111	0.549358	0.644972	0.625166	0.511803	0.51665	0.531261	0.776763	0.672536	0.598961	0.693371	0.605883	0.692552	0.517975	0.557065	0.564597	0.217693	0.22247	0.302043	0.313254	0.229392	0.391624	0.465845	0.494334	0.517121	k__Bacteria;p__Proteobacteria;c__Gammaproteobacteria;o__Enterobacterales;f__Enterobacteriaceae
OTU_2	0.0592789	0.0296569	0.0297789	0.0139131	0.0193354	0.0235721	0.0115419	0.00657298	0.00385313	0.00730525	0.0152382	0.0114548	0.023851	0.017156	0.0187775	0.0941488	0.0865995	0.0472488	0.0108445	0.0548155	0.036596	0.0667759	0.106545	0.0703327	0.0229444	0.0148023	0.0213753	0.07708	0.0659216	0.0562452	0.201583	0.329608	0.17951	0.0338238	0.0218286	0.0155346	k__Bacteria;p__Firmicutes;c__Bacilli;o__Lactobacillales;f__Enterococcaceae;g__Enterococcus;s__Enterococcus_mundtii
OTU_3	0.00669503	0.0119255	0.015151	0.0839668	0.0972522	0.0823105	0.00838622	0.00245833	0.00385313	0.00779343	0.00700886	0.0112456	0.0271811	0.0194226	0.017156	0.130623	0.100321	0.0862857	0.00158658	0.00411465	0.00985076	0.0142444	0.015831	0.0122568	0.0175047	0.033911	0.0339459	0.0193702	0.0258212	0.0282795	0.00617198	0.00550945	0.00932771	0.00564893	0.0114373	0.0119255	k__Bacteria;p__Proteobacteria;c__Alphaproteobacteria;o__Acetobacterales;f__Acetobacteraceae;g__Asaia;s__Asaia_bogorensis
OTU_4	0.00648581	0.00017435	0.00010461	0.00920566	0.00010461	0.000122045	0.00760165	0	0	0.249983	0.204617	0.15939	0.00017435	0.0182544	0.0179755	0.00985076	0.0126229	0.0252284	5.23049e-05	0.000296394	0.0175047	0.00013948	0.0154125	0.0114896	0.00557919	0.0163714	0.0180278	0.00826417	0.000122045	0.000418439	0.00863031	0.000331264	0.000122045	0.00721808	0.0496199	0.0299184	k__Bacteria;p__Proteobacteria;c__Gammaproteobacteria;o__Enterobacterales;f__Morganellaceae;g__Morganella;s__Morganella_morganii
OTU_5	0.00285933	0.00507358	0.00808982	0.00334751	0.00549201	0.00404491	0.00524793	0.0035916	0.00348699	0.00305112	0.00472488	0.00536997	0.0281052	0.0212532	0.0348351	0.0167376	0.00828161	0.0118732	0.000540484	0.000523049	0.00885696	0.0303543	0.0195969	0.0227526	0.00564893	0.012344	0.0114548	0.023729	0.0499861	0.0269022	0.00390543	0.00132506	0.0102343	0.00503871	0.00399261	0.0035393	k__Bacteria;p__Proteobacteria;c__Alphaproteobacteria;o__Acetobacterales;f__Acetobacteraceae;g__Gluconobacter;s__Gluconobacter_cerinus
OTU_6	0.00392287	0.0123091	0.0126752	0.00554432	0.0100425	0.0113676	0.0252458	0.0256643	0.0200153	0.00990306	0.0141572	0.0149766	0.161831	0.0317142	0.032307	0.028698	0.00746217	0.0295348	0.00876979	0.00108097	0.020521	0.00613711	0.0120824	0.00540484	0.00829904	0.0167724	0.0145756	0.0304066	0.0163366	0.0270591	0.014872	0.00631146	0.0125532	0.0269893	0.0207476	0.0301276	k__Bacteria;p__Proteobacteria;c__Gammaproteobacteria;o__Pseudomonadales;f__Pseudomonadaceae;g__Pseudomonas
OTU_7	0.00198759	0.000156915	5.23049e-05	0.00259781	0.000156915	0.00010461	0.00310342	8.71748e-05	0	0.0771149	0.101594	0.0903829	0.00190041	0.0148372	0.0138434	0.118662	0.0897029	0.101454	0.00488179	0.004289	0.0133203	0.000732269	0.012187	0.00845596	0.00197015	0.0123963	0.0134947	0.00301625	0	0.000191785	0.00296394	0.00273729	6.97399e-05	0.0024932	0.0237116	0.0168073	k__Bacteria;p__Proteobacteria;c__Gammaproteobacteria;o__Enterobacterales;f__Yersiniaceae;g__Serratia;s__Serratia_marcescens
OTU_8	0.0017435	0.00200502	0.00169119	0.00242346	0.00251064	0.000819443	0.00496897	0.000958923	0.000784574	0.0367355	0.0357591	0.0415998	0.0175744	0.013669	0.0126055	0.00465514	0.00369621	0.0102343	0.000470744	0.000470744	0.00657298	0.0193179	0.00828161	0.00470744	0.00360904	0.00679964	0.007776	0.0042367	0	0.000540484	0.00360904	0.000488179	0.00120301	0.00847339	0.00728782	0.00913592	k__Bacteria;p__Proteobacteria;c__Gammaproteobacteria;o__Pseudomonadales;f__Moraxellaceae;g__Acinetobacter
OTU_9	0.00292907	0.00399261	0.00484692	0.00789804	0.0140526	0.00833391	0.0283667	0.00010461	0.000418439	0.0440756	0.0182893	0.047057	0.0109666	0.010583	0.0122742	5.23049e-05	0.00020922	0.00704373	0.000645094	0.000383569	0.00598019	0.00108097	0.00535254	0.00472488	0.0184811	0.0248448	0.0210963	0.00662529	0.000278959	0.0028419	0.00896157	0.000854313	0.00240603	0.00943232	0.00828161	0.0203466	k__Bacteria;p__Proteobacteria;c__Gammaproteobacteria;o__Xanthomonadales;f__Xanthomonadaceae;g__Stenotrophomonas;s__Stenotrophomonas_maltophilia
OTU_10	0.000889183	0.000749704	0.00156915	0.000924053	0.00181324	0.00106353	0.00172606	0.000261525	0.000401004	0.00366134	0.0024409	0.00404491	0.00013948	0.00125532	0.00258038	3.48699e-05	0.00202246	0.00235372	0.0024409	0.0031906	0.00615454	0.00020922	0.00137736	0.00205733	0.00645094	0.00896157	0.00679964	0.00378339	0.00592789	0.00503871	0.00266755	0.00986819	0.000993793	0.00402748	0.00170863	0.00383569	k__Bacteria;p__Proteobacteria;c__Alphaproteobacteria;o__Rhizobiales;f__Rhizobiaceae;g__Allorhizobium-Neorhizobium-Pararhizobium-Rhizobium;s__Agrobacterium_radiobacter
OTU_11	0.0014471	0.00191785	0.00230142	0.0020922	0.00200502	0.00223168	0.0280006	0.0284887	0.0258038	0.00514332	0.0060848	0.00475975	0.00364391	0.00803752	0.00751447	0.0131111	0.0152556	0.0123091	0.00228398	0.00421926	0.0113502	0.00516075	0.00641607	0.00252807	0.00420183	0.0063812	0.00559662	0.00765395	0.00479462	0.00550945	0.00489923	0.00465514	0.00355673	0.00681707	0.00261525	0.00278959	k__Bacteria;p__Proteobacteria;c__Gammaproteobacteria;o__Pseudomonadales;f__Moraxellaceae;g__Acinetobacter;s__Acinetobacter_johnsonii
OTU_12	0.000749704	0.00235372	0.00224911	0.0013948	0.00162145	0.00270242	0.00237116	0.000697399	0.000767139	0.00364391	0.00013948	0.00024409	0.000122045	8.71748e-05	0.00020922	3.48699e-05	0.00010461	0.000906618	5.23049e-05	6.97399e-05	0.0042367	0.00141223	0.000470744	0.000156915	0.00169119	1.7435e-05	0.000366134	0.0271288	0.0233977	0.0228398	0.00320803	0.000523049	0.00350443	0.00315573	0.00369621	0.00432387	k__Bacteria;p__Proteobacteria;c__Gammaproteobacteria;o__Pseudomonadales;f__Pseudomonadaceae;g__Pseudomonas
OTU_13	0	0.000331264	0.00666016	0	0.00102866	0.000278959	0	0	0	0	0.000993793	0.00299881	0.000313829	0.000854313	0.00237116	0	0	0.00247577	0	0	0.00275472	0	0.000924053	0.0209394	0	0.00134249	0.00101123	0	3.48699e-05	0.000819443	0	0	0.000348699	0	0.00129019	0.000645094	k__Bacteria;p__Proteobacteria;c__Gammaproteobacteria;o__Oceanospirillales;f__Alcanivoracaceae1;g__Alcanivorax
OTU_14	0.00017435	0.00013948	0.000191785	0.000366134	0	1.7435e-05	0.0102518	0.013669	0.00890927	0.000156915	0.000749704	0.000610224	0.0017958	0.00165632	0.00266755	3.48699e-05	0.00010461	0.000697399	0.00313829	0.00371365	0.000278959	0.00156915	0.00369621	0.00699142	0.000331264	0.000488179	0.000871748	0.000156915	0	0	0.00020922	0.00013948	0.000331264	0.00024409	6.97399e-05	5.23049e-05	k__Bacteria;p__Firmicutes;c__Bacilli;o__Bacillales;f__Planococcaceae;g__Domibacillus
OTU_15	3.48699e-05	3.48699e-05	0.00010461	5.23049e-05	0	8.71748e-05	0.0128321	0	0	0.00456796	1.7435e-05	0.000313829	0	8.71748e-05	0.000156915	0	0.000313829	0.000226655	0	8.71748e-05	1.7435e-05	0	1.7435e-05	0.000191785	0.00692168	3.48699e-05	3.48699e-05	0.0126752	5.23049e-05	0	0.0142618	0.000313829	8.71748e-05	0.0078283	1.7435e-05	0.00010461	k__Bacteria;p__Proteobacteria;c__Alphaproteobacteria;o__Rhizobiales;f__Xanthobacteraceae;g__Rhodopseudomonas;s__Rhodopseudomonas_palustris
OTU_16	0.000383569	0.000418439	0.000505614	0.000453309	0.000453309	0.000453309	0.000575354	0.000435874	0.000401004	0.00636376	0.00247577	0.00399261	0.000505614	0.00013948	0.000453309	0	0.000453309	0.000523049	0	0.0010984	0.00122045	0	0.000505614	0.000122045	0.00193528	0.000278959	0.00020922	0.00570123	0.00207476	0.00345212	0.0163889	0.0188123	0.00826417	0.025333	0.00364391	0.00611967	k__Bacteria;p__Bacteroidota;c__Bacteroidia;o__Sphingobacteriales;f__Sphingobacteriaceae;g__Sphingobacterium
OTU_17	0.00622428	0	0	0.000122045	0	0	0.00223168	0	0	0.0134772	3.48699e-05	1.7435e-05	0	0	0	0	0	5.23049e-05	0	0	0	0	0	0	0.00216194	0	0	0.000122045	0	0	0.00240603	0	0	0.00556175	0	3.48699e-05	k__Bacteria;p__Proteobacteria;c__Alphaproteobacteria;o__Rhodobacterales;f__Rhodobacteraceae;g__Rhodobacter;s__Rhodobacter_blasticus
OTU_18	0.000836878	0.000697399	0.00142967	0.000958923	0.00556175	0.00327777	0.000313829	0.000540484	0.00013948	0.000366134	0.0010984	8.71748e-05	0	5.23049e-05	0.000191785	0	0.000523049	1.7435e-05	0	3.48699e-05	0.0014471	0.000122045	0.000366134	0.000191785	0.000418439	0.000732269	0.000453309	0.0101297	0.0108097	0.011664	0.000470744	1.7435e-05	0.00116814	0.000679964	0.0017958	0.000941488	k__Bacteria;p__Firmicutes;c__Bacilli;o__Lactobacillales;f__Leuconostocaceae;g__Weissella
OTU_19	0	0	0	0	0	0	0	0.00197015	0.000836878	1.7435e-05	0	0	6.97399e-05	0	0	0.00020922	5.23049e-05	0	0.000296394	1.7435e-05	0	0.0242869	0	0	0	0	0	0	0	0	0	0	0	0	0	0	k__Bacteria;p__Verrucomicrobiota;c__Verrucomicrobiae;o__Verrucomicrobiales;f__Akkermansiaceae;g__Akkermansia;s__
OTU_20	0.00013948	0.000122045	8.71748e-05	0.00010461	6.97399e-05	0.00010461	1.7435e-05	0	0	0.000470744	0.000854313	0.000924053	0.00020922	6.97399e-05	0.00013948	0.0167899	0.00317316	0.00184811	5.23049e-05	0.00010461	0.00013948	6.97399e-05	0.00013948	0.000122045	0.000313829	0.00010461	6.97399e-05	0.00411465	0.00118558	0.000732269	0.000836878	0.00101123	6.97399e-05	0.000191785	0.000226655	5.23049e-05	k__Bacteria;p__Bacteroidota;c__Bacteroidia;o__Flavobacteriales;f__Weeksellaceae;g__Elizabethkingia;s__Elizabethkingia_meningoseptica
OTU_21	0.00788061	0	0	0.00795035	1.7435e-05	0.000122045	0.00897901	0	0	0.0063812	5.23049e-05	1.7435e-05	0	0	0	0	6.97399e-05	0.00123788	0	0	0	0	1.7435e-05	1.7435e-05	0.00371365	5.23049e-05	0.00013948	0.0099205	0	0	0.0102866	0.00010461	0	0.00625915	0	0	k__Bacteria;p__Proteobacteria;c__Gammaproteobacteria;o__Aeromonadales;f__Aeromonadaceae;g__Aeromonas
OTU_22	0	0	0	3.48699e-05	0	6.97399e-05	8.71748e-05	0	3.48699e-05	0.0250889	0	0	0.00190041	0	0	0	3.48699e-05	8.71748e-05	1.7435e-05	0	0	0	0	0	3.48699e-05	0	6.97399e-05	0.00102866	1.7435e-05	0	0.000383569	0	0	5.23049e-05	0	0	k__Bacteria;p__Proteobacteria;c__Gammaproteobacteria;o__Pseudomonadales;f__Pseudomonadaceae;g__Pseudomonas;s__Pseudomonas_aeruginosa
OTU_23	0.000156915	0.000401004	0.000627659	0.000278959	0.000401004	0.000366134	0.000261525	0	0	0.00010461	0.00020922	0.00017435	0.00010461	0.000156915	0.000435874	0.00013948	0.000523049	0.00024409	0.00430644	0.000383569	0.00219681	0	0.00010461	0.00013948	0.00024409	6.97399e-05	0.00013948	0.00184811	0.00784574	0.00681707	0.000261525	0.00120301	0.000366134	0.000401004	0.00198759	0.000819443	k__Bacteria;p__Actinobacteriota;c__Actinobacteria;o__Micrococcales;f__Microbacteriaceae;g__Microbacterium
OTU_24	0.00115071	0	0	0.00102866	0	0	0.00374852	0	0	0.00348699	0	0	8.71748e-05	0	0	0	0	0	0	0	0	3.48699e-05	0	0	0.0127624	0	0	0.00265012	0	0	0.000156915	0	0	0.00336495	0	0	k__Bacteria
OTU_25	0	0	0	0	0	0	0	0.00521306	0.0215496	0	6.97399e-05	0	5.23049e-05	0	0	0.000226655	6.97399e-05	0	6.97399e-05	0	0	0.000156915	0	3.48699e-05	0	0	0	0	0	0	0	0	0	0	3.48699e-05	0	k__Bacteria;p__Firmicutes;c__Clostridia;o__Lachnospirales;f__Lachnospiraceae;g__Lachnospiraceae_NK4A136_group;s__
OTU_26	0	0	0	0	0	0.000156915	0.00123788	0.00469001	0	0	0	5.23049e-05	0	0	0	0	0	0	0	0.000156915	0.00505614	0	3.48699e-05	0	0	0	0.000784574	0	0	0.000331264	1.7435e-05	0	0	0	0	0	k__Bacteria
OTU_27	3.48699e-05	0.00148197	0.00205733	5.23049e-05	0.00207476	0.00336495	0.000122045	0	0.000156915	3.48699e-05	0.00442848	0.00298138	0.00550945	0.00151684	0.00362647	8.71748e-05	0.000592789	0.00202246	3.48699e-05	0.00190041	0.000401004	0.000122045	0.000313829	0.000924053	3.48699e-05	0.00184811	0.00331264	0.00013948	0.000767139	0.000592789	1.7435e-05	0.00808982	0.000156915	0.000348699	0.00507358	0.00294651	k__Bacteria;p__Firmicutes;c__Bacilli;o__Bacillales;f__Bacillaceae;g__Bacillus
OTU_28	0	0.00024409	0.000366134	0.000191785	0.00017435	0.000191785	0.00024409	0.00020922	0.000226655	0.00024409	6.97399e-05	3.48699e-05	0	0	0.000122045	0	0.000261525	0.000156915	6.97399e-05	0.000383569	0.000453309	1.7435e-05	5.23049e-05	6.97399e-05	0.000278959	3.48699e-05	8.71748e-05	0.00198759	0.00575354	0.00427157	0.000470744	8.71748e-05	0.00024409	0.000662529	0.000278959	0.000331264	k__Bacteria;p__Proteobacteria;c__Alphaproteobacteria;o__Caulobacterales;f__Caulobacteraceae;g__Brevundimonas;s__Brevundimonas_vesicularis
OTU_29	0.00017435	0	0	0.00010461	0	0	0.0193005	0	0	0.00202246	3.48699e-05	0	0	0	0	0	0	0	0	0	0	0	0	0	0.00737499	0	0	0.000191785	0	0	0.000435874	0	0	0.000278959	3.48699e-05	0	k__Bacteria;p__Bacteroidota;c__Bacteroidia;o__Bacteroidales;f__Bacteroidaceae;g__Bacteroides;s__Bacteroides_plebeius
OTU_30	0	0.000156915	0.00010461	0	3.48699e-05	1.7435e-05	0	0	0	0	5.23049e-05	0.00013948	0	0.00017435	0.000122045	0	0.000523049	3.48699e-05	0	0.000366134	0.000261525	0	1.7435e-05	0.000156915	0	0.00013948	0.00010461	0	1.7435e-05	0.000331264	0	0.012187	8.71748e-05	0	0.000122045	0.00017435	k__Bacteria;p__Bacteroidota;c__Bacteroidia;o__Chitinophagales;f__Chitinophagaceae;g__Flavitalea;s__
OTU_31	0.000226655	0	0	0.000313829	0	0	0.00517819	8.71748e-05	0	0.000854313	1.7435e-05	0	0	0	0	0	0	0	0	5.23049e-05	0	3.48699e-05	0	0	0.00299881	0	0	0.000627659	0	0	0.000610224	0	0	0.000627659	0	0	k__Bacteria;p__Firmicutes;c__Clostridia;o__Lachnospirales;f__Lachnospiraceae
OTU_32	0	0	0	0	0	0	0	0.00397517	0.00629402	0	0	0	0.000331264	0	0	0.00013948	0	0	0.000261525	0	0	0.000156915	0	0	0	0	0	0	0	0	0	0	0	0	3.48699e-05	0	k__Bacteria;p__unidentified_Bacteria;c__Desulfovibrionia;o__Desulfovibrionales;f__Desulfovibrionaceae;g__;s__
OTU_33	6.97399e-05	3.48699e-05	8.71748e-05	0.000191785	0.000802009	0.000976358	0.00160402	0.00230142	0.00190041	0.00010461	0.000610224	0.000226655	0	0.00020922	0.000261525	0	0.000401004	0.000191785	1.7435e-05	6.97399e-05	0.000122045	0.00017435	0.000278959	0.000261525	0.00240603	0.000470744	0.00115071	0.000383569	0.000401004	0.00024409	0.000313829	3.48699e-05	0.00010461	0.000122045	0.00013948	0.00020922	k__Bacteria;p__Firmicutes;c__Bacilli;o__Staphylococcales;f__Staphylococcaceae;g__Staphylococcus;s__Staphylococcus_sciuri
OTU_34	0	0	0	0	0	0	0	0.00514332	0.00413209	0	0	0	0	0	0	8.71748e-05	0	0	0	0	0	5.23049e-05	0	0	0	0	0	0	0	0	0	0	0	0	0	0	k__Bacteria;p__Bacteroidota;c__Bacteroidia;o__Bacteroidales;f__Muribaculaceae;g__;s__
OTU_35	0.000156915	5.23049e-05	6.97399e-05	0.000453309	0	0	5.23049e-05	0	0	0.00137736	0.00210963	0.000523049	0	0.000366134	0.00020922	0	0.000505614	0.000540484	0.00017435	0.00017435	0.00160402	0	0.000156915	0.000156915	0.000331264	0.00020922	0.000296394	0.000697399	0	0.00010461	0.000749704	0.000122045	0	0.000278959	0.00020922	5.23049e-05	k__Bacteria;p__Proteobacteria;c__Gammaproteobacteria;o__Burkholderiales;f__Comamonadaceae;g__Delftia;s__Delftia_tsuruhatensis
OTU_36	6.97399e-05	0	1.7435e-05	0	1.7435e-05	1.7435e-05	0	3.48699e-05	0	0	3.48699e-05	0	0.00559662	0.00017435	3.48699e-05	1.7435e-05	0.000122045	1.7435e-05	0	0	5.23049e-05	6.97399e-05	0	0	5.23049e-05	3.48699e-05	0	5.23049e-05	0	1.7435e-05	1.7435e-05	0	0	0.000871748	0.000470744	0.00024409	k__Bacteria;p__Bacteroidota;c__Bacteroidia;o__Flavobacteriales;f__Weeksellaceae;g__Chryseobacterium;s__Chryseobacterium_hispanicum
OTU_37	6.97399e-05	0	0	5.23049e-05	3.48699e-05	0	5.23049e-05	0.00010461	0	0	1.7435e-05	0	0	0	0.000366134	0	0	0	0	5.23049e-05	0	0.000383569	0	0	5.23049e-05	0	0	0.000505614	0	0	0	0	0	0.00010461	0.00371365	0	k__Bacteria
OTU_38	0	0	0	0	0	0	0	0	0	0	0	0	0	0	0	0	0.00592789	0.000278959	0	0	0	0	0	0	0	0	0	0	0	0	0	1.7435e-05	0	0	0	0	k__Bacteria
OTU_39	8.71748e-05	5.23049e-05	0.00151684	0.00278959	1.7435e-05	3.48699e-05	0.000401004	0	0	0.000122045	0	0	0	0	5.23049e-05	0	0	0	0	0	0	0	0	0	0.000575354	0	0	0.000296394	5.23049e-05	0.00010461	0.000313829	0	0	0.000296394	3.48699e-05	0.00010461	k__Bacteria;p__Proteobacteria;c__Gammaproteobacteria;o__Burkholderiales;f__Hydrogenophilaceae;g__Hydrogenophilus;s__Hydrogenophilus_thermoluteolus
OTU_40	0.00010461	0	0	8.71748e-05	0	0	0.00634633	0	0	0.000348699	0	0	0	0	0	0	0	0	0	0	0	0	0	0	0.00676477	0	0	8.71748e-05	0	0	0.000226655	0	0	0.000156915	3.48699e-05	0	k__Bacteria;p__Fusobacteriota;c__Fusobacteriia;o__Fusobacteriales;f__Fusobacteriaceae;g__Fusobacterium
OTU_41	0.000732269	0.000802009	0.000906618	0.00010461	0.000122045	0.00013948	0.000366134	0.00017435	0.000523049	0.00017435	0.00020922	0.000470744	1.7435e-05	0.000976358	0.00118558	0.000418439	0.00135993	0.000488179	0.000366134	0.000784574	0.00142967	1.7435e-05	0.000784574	0.000941488	0.00010461	0.000122045	0.000278959	0.000191785	3.48699e-05	0.00106353	6.97399e-05	0.00374852	0.000802009	5.23049e-05	0.000191785	0.00024409	k__Bacteria;p__Actinobacteriota;c__Actinobacteria;o__Micrococcales;f__Micrococcaceae
OTU_42	0	0	5.23049e-05	0	8.71748e-05	0.00010461	0	0	0	0	0.000226655	0.00017435	0	0.00020922	0.000191785	0	0	0.00024409	0	0	0.000122045	0	0.000278959	0.00013948	1.7435e-05	8.71748e-05	0.00416696	0	0	0	0	5.23049e-05	5.23049e-05	0	0	0	k__Bacteria;p__Actinobacteriota;c__Actinobacteria;o__Micrococcales;f__Dermacoccaceae;g__Kytococcus
OTU_43	0	0.000505614	0.000784574	5.23049e-05	0.00017435	0.000575354	0	0	0	5.23049e-05	0.00020922	0.000540484	0	0.000488179	0.0013948	0	0.00122045	0.000348699	0	0.000697399	0.000470744	0	0.00017435	0.00170863	1.7435e-05	0.00024409	0.000401004	0	0.00010461	0.000383569	0	0.00221424	0.000261525	0.00017435	0.000261525	0.000488179	k__Bacteria;p__Proteobacteria;c__Alphaproteobacteria;o__Sphingomonadales;f__Sphingomonadaceae;g__Sphingomonas
OTU_44	0	0	0	0	0	0	0	0.00305112	0.0039403	0	0	0	0.000226655	0	0	0.000191785	0.00013948	0	0	0	0	0	0	0	0	0	0	0	0	0	0	0	0	0	0	0	k__Bacteria;p__Firmicutes;c__Bacilli;o__Erysipelotrichales;f__Erysipelotrichaceae;g__Dubosiella;s__
OTU_45	0.00010461	0	0	0.00010461	0	0	0.00543971	0.00024409	0.00010461	0.000470744	0	0	0	0	0	0	0	0	0	0	0	1.7435e-05	0	0	0.000924053	0	0	0.000348699	0	0	0.000401004	0	0	0.000156915	0	0	k__Bacteria;p__Firmicutes;c__Clostridia;o__Lachnospirales;f__Lachnospiraceae
OTU_46	0.00010461	0.00013948	0.000122045	0.00017435	0.000924053	0.000383569	0.000662529	0.000505614	0.000383569	0.000348699	0.000819443	0.000331264	0	0.00010461	0.000278959	0	0.00024409	0.000435874	0	0.000122045	0.00010461	0	8.71748e-05	0.000122045	0.000453309	0.000313829	0.00024409	6.97399e-05	3.48699e-05	0.00017435	8.71748e-05	5.23049e-05	0.000226655	0.00134249	0.000313829	0.00024409	k__Bacteria;p__Proteobacteria;c__Gammaproteobacteria;o__Pseudomonadales;f__Moraxellaceae;g__Acinetobacter;s__Acinetobacter_lwoffii
OTU_47	5.23049e-05	3.48699e-05	0.000662529	0	0	1.7435e-05	0	0	0	1.7435e-05	0.00010461	0.000122045	0	1.7435e-05	0.000802009	0	0.000976358	0.000331264	0	0.00010461	0.00024409	0	3.48699e-05	8.71748e-05	8.71748e-05	1.7435e-05	0	0.000122045	0	0.00020922	0.00017435	0.00256294	8.71748e-05	0.00020922	1.7435e-05	0.00010461	k__Bacteria;p__Proteobacteria;c__Alphaproteobacteria;o__Sphingomonadales;f__Sphingomonadaceae;g__Sphingopyxis;s__Sphingopyxis_chilensis
OTU_48	0	0.000156915	8.71748e-05	5.23049e-05	0.00017435	0	1.7435e-05	0	0	5.23049e-05	5.23049e-05	5.23049e-05	0	0.000645094	5.23049e-05	8.71748e-05	3.48699e-05	0.000401004	5.23049e-05	6.97399e-05	0	0.00010461	8.71748e-05	0.00228398	5.23049e-05	0.000122045	8.71748e-05	1.7435e-05	0	6.97399e-05	0	0	0.000383569	0.000924053	0	0	k__Bacteria;p__Actinobacteriota;c__Actinobacteria;o__Propionibacteriales;f__Propionibacteriaceae;g__Cutibacterium;s__Cutibacterium_acnes
OTU_49	5.23049e-05	6.97399e-05	1.7435e-05	0.00024409	0	0	0	0	0	0.00120301	0	5.23049e-05	0.00017435	0	5.23049e-05	0	0.000383569	8.71748e-05	0	0	0	0	0	0	0.00160402	0	0	0.00163889	0	0	0.00183067	1.7435e-05	0	0.000958923	0	0	k__Bacteria;p__Proteobacteria;c__Gammaproteobacteria;o__Xanthomonadales;f__Xanthomonadaceae;g__Pseudoxanthomonas;s__Pseudoxanthomonas_mexicana
OTU_50	5.23049e-05	0.00010461	0.000122045	0	0.000122045	8.71748e-05	3.48699e-05	0.00010461	0	0	0	0	0	0	0	0	5.23049e-05	0	0	1.7435e-05	0	0	0.000418439	0	3.48699e-05	0	0	0	0	0.000122045	0.000575354	0.000540484	0.00407978	1.7435e-05	0.000296394	0.000278959	k__Bacteria;p__Firmicutes;c__Bacilli;o__Lactobacillales;f__Lactobacillaceae;g__Lactobacillus;s__Lactobacillus_crustorum
OTU_51	0	0.000819443	0.000924053	0	0.00101123	0.00207476	0	0	0	0	0.00355673	0.00137736	0	0.00101123	0.000732269	0	0.000523049	0.00115071	0	0.000226655	0.000313829	0	1.7435e-05	0.000435874	0	0.000819443	0.00231885	0	0.000191785	0.00010461	0	0.000767139	5.23049e-05	0	0.00366134	0.00184811	k__Bacteria;p__Firmicutes;c__Bacilli;o__Bacillales;f__Bacillaceae;g__Bacillus
OTU_52	0	3.48699e-05	0	0	0	5.23049e-05	0	0	0	0	0	0	0.000122045	0	0	0.0028419	0.000592789	0.000261525	0	0	0	0.00465514	0	0	0	1.7435e-05	0	0	0	0	0	0	1.7435e-05	0	0	3.48699e-05	k__Bacteria;p__Proteobacteria;c__Gammaproteobacteria;o__Enterobacterales;f__Yersiniaceae;g__Serratia;s__Serratia_liquefaciens
OTU_53	0	0	0	0	0	5.23049e-05	0	0	0	0	3.48699e-05	0.000156915	0	0.00010461	8.71748e-05	0	0	6.97399e-05	0	0	5.23049e-05	0	6.97399e-05	1.7435e-05	0	5.23049e-05	0.00299881	0	0	0	0	0	0	0	0	0	k__Bacteria;p__Proteobacteria;c__Alphaproteobacteria;o__Caulobacterales;f__Caulobacteraceae;g__PMMR1;s__
OTU_54	0	0.000383569	0.000889183	0	0.000784574	0.00102866	0	0	0	0	0.000662529	0.00148197	0	0.000505614	0.00116814	0	5.23049e-05	0.000191785	0	0.000871748	0	0	0	0.00020922	0	0.00115071	0.000836878	0	6.97399e-05	6.97399e-05	0	0.00181324	0	0	0.000645094	0.00132506	k__Bacteria;p__Acidobacteriota;c__Acidobacteriae;o__Acidobacteriales;f__Acidobacteriaceae_(Subgroup_1);g__Granulicella;s__
OTU_55	6.97399e-05	0.000156915	3.48699e-05	6.97399e-05	8.71748e-05	5.23049e-05	0.00010461	0	0	0.000156915	0	5.23049e-05	0	0	0	0	0	0	0	0	0.000732269	0	0	0	1.7435e-05	0	0	0.00299881	0.00205733	0.0014471	6.97399e-05	0	8.71748e-05	0.00013948	0.00013948	0.00017435	k__Bacteria;p__Proteobacteria;c__Gammaproteobacteria;o__Enterobacterales;f__Morganellaceae;g__Providencia;s__
OTU_56	0	0	0	0	0	0	0	0.00575354	0.00205733	0	0	0	5.23049e-05	0	0	3.48699e-05	0	0	0.00020922	0	0	0.000453309	0	0	0	0	0	0	0	0	0	0	0	0	0	0	k__Bacteria;p__Desulfobacterota;c__Desulfovibrionia;o__Desulfovibrionales;f__Desulfovibrionaceae;g__Desulfovibrio;s__
OTU_57	1.7435e-05	0	0	0	0	0	0	0.00434131	0.00160402	0	0.00010461	0	0	0	0	6.97399e-05	0	0	1.7435e-05	0	0	0.000122045	0	0	1.7435e-05	0	0	0	0	0	0	0	0	0	0.000226655	0	k__Bacteria;p__Firmicutes;c__Clostridia;o__Lachnospirales;f__Lachnospiraceae;g__Roseburia;s__
OTU_58	0	0.00010461	0.0039403	0	0.00010461	3.48699e-05	0	0	0	0	0	0	0	0	0.00020922	0	0	0	0	0	0	0	0	0	0	0	0	0	0	0.00013948	0	0	8.71748e-05	0	0.000122045	0.000122045	k__Bacteria;p__Proteobacteria;c__Gammaproteobacteria;o__Oceanospirillales;f__Halomonadaceae;g__Halomonas
OTU_59	0.000313829	0	0	0.00024409	0	0	0.00585815	0	1.7435e-05	0.000505614	0	0	0	0	0	0	0	1.7435e-05	0	0	0	0	3.48699e-05	0	0.00230142	0	3.48699e-05	0.000453309	0	0	0.000523049	1.7435e-05	0	0.000296394	0	0	k__Bacteria;p__Firmicutes;c__Clostridia;o__Oscillospirales;f__Ruminococcaceae;g__Faecalibacterium;s__Faecalibacterium_prausnitzii
OTU_60	0	0	0	0	0	0	0.00017435	0.00475975	0.00509101	0	0	0	0.00020922	0	0	5.23049e-05	0	0	0	0	0	0.000122045	0	0	0	0	0	0	0	0	0	0	0	3.48699e-05	0	0	k__Bacteria;p__Firmicutes;c__Clostridia;o__Lachnospirales;f__Lachnospiraceae;g__Lachnospiraceae_UCG-006;s__
OTU_61	0.000156915	1.7435e-05	0.00020922	0	8.71748e-05	0.000854313	0.00010461	0.000592789	0.000767139	0	0.000278959	1.7435e-05	0	1.7435e-05	5.23049e-05	0	0.000348699	0	0.000366134	0.000435874	0	0.00191785	0.000296394	3.48699e-05	0.00010461	5.23049e-05	0.000122045	3.48699e-05	6.97399e-05	8.71748e-05	0	0	0.000156915	3.48699e-05	0.000662529	1.7435e-05	k__Bacteria;p__Firmicutes;c__Bacilli;o__Lactobacillales;f__Lactobacillaceae;g__Lactobacillus;s__Lactobacillus_johnsonii
OTU_62	0	0.000156915	0.000261525	3.48699e-05	0.000278959	0.000401004	5.23049e-05	0	0	0	0.000313829	0.000679964	3.48699e-05	0.00024409	0.000540484	0	0.000401004	0.000401004	0	0.000418439	0.000191785	0	5.23049e-05	0.000296394	8.71748e-05	0.000383569	0.000749704	0.00010461	0.000122045	0.000366134	0.00017435	0.00132506	5.23049e-05	0	0.000366134	0.000523049	k__Bacteria;p__Proteobacteria;c__Alphaproteobacteria;o__Rhizobiales;f__Xanthobacteraceae;g__Bradyrhizobium
OTU_63	0	0.000261525	0.000435874	0	8.71748e-05	0.000331264	0	0	0	0	0.00156915	0.000331264	0	0.000470744	0.000401004	0.00017435	0.000488179	0.000296394	0	0.000156915	0.000488179	0	8.71748e-05	0.00013948	0	8.71748e-05	0.00020922	0	6.97399e-05	0.000313829	3.48699e-05	0.000488179	3.48699e-05	0.000226655	0.0021445	0.000261525	k__Bacteria;p__Proteobacteria;c__Alphaproteobacteria;o__Sphingomonadales;f__Sphingomonadaceae;g__Sphingomonas
OTU_64	0	3.48699e-05	0.00020922	0	6.97399e-05	0.000156915	0	0	0	3.48699e-05	0.000156915	0.000662529	0	6.97399e-05	0.000505614	0	0.00172606	0.000645094	0	0.000488179	0.000435874	0	0	0.000261525	0	0.00010461	0.00013948	0	3.48699e-05	0.000435874	5.23049e-05	0.00130762	6.97399e-05	0	8.71748e-05	0.000993793	k__Bacteria;p__Proteobacteria;c__Gammaproteobacteria;o__Xanthomonadales;f__Xanthomonadaceae
OTU_65	0	0	0	0	0	0	0	0.00120301	0.00210963	0	0	0	0.000156915	0	0	0	0	0	0	0	0	0.00024409	0	0	0	0	0	0	0	0	0	0	0	0	0	0	k__Bacteria;p__Firmicutes;c__Clostridia;o__Oscillospirales;f__Ruminococcaceae;g__[Eubacterium]_siraeum_group;s__
OTU_66	0	0	0	0.00010461	0	0	5.23049e-05	1.7435e-05	1.7435e-05	0	0	0	0	0	0	0	0.000226655	5.23049e-05	0	6.97399e-05	0	0	6.97399e-05	0	0.000261525	0	0	5.23049e-05	0	0	0.000296394	0.00102866	1.7435e-05	0.000697399	0	0	k__Bacteria
OTU_67	0	0	0	0	0	0	0	0.00223168	0.00203989	0	0	0	0.000278959	0	0	0	0	0	0.000854313	0	0	0.00020922	0	0	0	0	0	0	0	0	0	0	0	0	0	0	k__Bacteria;p__Firmicutes;c__Bacilli;o__Erysipelotrichales;f__Erysipelotrichaceae;g__Dubosiella;s__Firmicutes_bacterium_M10-2
OTU_68	0.00013948	0	0	0.000226655	0	0	0.00305112	0	0	0.00024409	0.00010461	0	0	3.48699e-05	0	0	0	0	0	0	0	0	1.7435e-05	0	0.00169119	0	0	0.000261525	0	0	0.00017435	0	0	0.00024409	0.00010461	0	k__Bacteria;p__Firmicutes;c__Clostridia;o__Lachnospirales;f__Lachnospiraceae;g__Blautia
OTU_69	0	0.000435874	0.00024409	0	0.000296394	0.000261525	0	0	0	0	0.00024409	0.00013948	0	0.000732269	0.000383569	0	0.000679964	0.000645094	0	5.23049e-05	5.23049e-05	0	0.000401004	0	0	0.000453309	0.000296394	0	0	3.48699e-05	0	0.000261525	0.000366134	0	0.000331264	0.00024409	k__Bacteria;p__Proteobacteria;c__Gammaproteobacteria;o__Xanthomonadales;f__Xanthomonadaceae;g__Arenimonas;s__
OTU_70	0	8.71748e-05	0	0	0.000836878	0.000732269	0	0	0	0	0.000610224	0.000505614	0	0.00020922	0	0	0.000488179	0.0010461	0	0.000226655	0	0	0.00010461	0	0	0.00106353	0.00115071	0	0	0	0	0.000331264	8.71748e-05	0	0.000505614	0.000366134	k__Bacteria
OTU_71	0.000906618	0	0	0.00224911	0	1.7435e-05	0.00142967	0	0	0.00106353	0	0	0	0	0	0	0	0	0	0	0	0	0	0	0.000906618	0	0	0.00162145	0	0	0.00231885	0	0	0.00169119	0	0	k__Bacteria;p__Proteobacteria;c__Gammaproteobacteria;o__Alteromonadales;f__Shewanellaceae;g__Shewanella;s__Shewanella_sp_FDAARGOS_354
OTU_72	0.00013948	0	0	0.000383569	0	0	0.00024409	0.000296394	0.00017435	8.71748e-05	5.23049e-05	0	0	0	0	0	3.48699e-05	0	0	5.23049e-05	0	0	0	0	0.000453309	0	0	0	0	0	0.000575354	0.000156915	0	0.000226655	0	0	k__Bacteria
OTU_73	0.00010461	0	0	0.00385313	0	0	0.000261525	0	0.000122045	0.00013948	0	0	0	0	0	0	0	1.7435e-05	0	0	0	0	0	0	0.000226655	0	0	0.000191785	0	0	0.000313829	0	0	0.000401004	0	0	k__Bacteria;p__Proteobacteria;c__Gammaproteobacteria;o__Burkholderiales;f__Comamonadaceae;g__Comamonas;s__Comamonas_denitrificans
OTU_74	0	0	0.00013948	0	0	8.71748e-05	0	0	0	0	6.97399e-05	0.00017435	0	3.48699e-05	0.00024409	0	0.000679964	0.000470744	0	0.000470744	0.000470744	0	1.7435e-05	8.71748e-05	0	0.000156915	5.23049e-05	0	0	0.000278959	0	0.00265012	5.23049e-05	0	1.7435e-05	0.00010461	k__Bacteria;p__Proteobacteria;c__Gammaproteobacteria;o__Burkholderiales;f__Nitrosomonadaceae;g__Nitrosospira;s__
OTU_75	0	0	3.48699e-05	0	0	8.71748e-05	0	0	0	0	0.00010461	0.000610224	0	0	0	0	0.00013948	0.00010461	0	8.71748e-05	0.000156915	0	1.7435e-05	0	0	0	6.97399e-05	0	0	0.00024409	0	0.00156915	0	0	6.97399e-05	0.000906618	k__Bacteria;p__Gemmatimonadetes;c__unidentified_Gemmatimonadetes;o__Gemmatimonadales;f__Gemmatimonadaceae;g__Gemmatimonas;s__
OTU_76	0	0	0	0	0	0	0	0	0	0	0.000278959	0.000278959	0	8.71748e-05	0.00013948	0	0	8.71748e-05	0	0	0.00348699	0	0.00020922	0.000122045	0	0.000156915	0.000296394	0	0	0.000261525	0	0	0	0	0	0	k__Bacteria
OTU_77	0	0	0	0	0	0	0	0.00216194	0.00502127	0	0.00010461	0	0	0	0	3.48699e-05	1.7435e-05	0	0	0	0	5.23049e-05	0	0	0	0	0	0	0	0	0	0	0	0	6.97399e-05	0	k__Bacteria;p__Firmicutes;c__Clostridia;o__Lachnospirales;f__Lachnospiraceae;g__[Eubacterium]_xylanophilum_group;s__
OTU_78	0	0	0	0	0	0	0	0.00294651	0.000435874	0	0	0	0	0	0	0	0	0	0	0	0	0	0	0	0	0	0	0	0	0	0	0	0	0	0	0	k__Bacteria;p__Firmicutes;c__Clostridia;o__Lachnospirales;f__Lachnospiraceae
OTU_79	0	0	0	0	0	3.48699e-05	0	0	0	0	0	0	0	0	0	0	0.00013948	0	0	0.000802009	0	0	0	0	0	0	0	0	0	0	1.7435e-05	0.00158658	0.00115071	0	0	0	k__Bacteria
OTU_80	0	0	0	0.00181324	0	0	0.000156915	0	0	6.97399e-05	0	0	0	0	0	0	0	0	0	0	0	0	0	0	0.000662529	0	0	3.48699e-05	0	0	0.00020922	0	0	0	0	0	k__Bacteria
OTU_81	0.000122045	0	0	0.00020922	0	0	6.97399e-05	0	0	0.000156915	0	0	0	0	0	0	0	0	0	0	0	0	0	0	0.00122045	0	0	0.000714834	0	0	0.000958923	0	0	0.000854313	0	0	k__Bacteria;p__Actinobacteriota;c__Acidimicrobiia;o__Microtrichales;f__Microtrichaceae;g__Candidatus_Microthrix;s__
OTU_82	0	0	0	0	0	0	0	0.00237116	0.00294651	0	0	0	0	0	0	0	0	0	3.48699e-05	0	0	0	0	0	0	0	0	0	0	0	0	0	0	0	0	0	k__Bacteria
OTU_83	0	0	0	0	0	0	0	0.00280703	0.00291164	0	0	0	6.97399e-05	0	0	0.00010461	0	0	0.000156915	0	0	0	0	0	0	0	0	0	0	0	0	0	0	0	0	0	k__Bacteria;p__unidentified_Bacteria;c__Clostridia;o__Lachnospirales;f__Lachnospiraceae
OTU_84	0	0	0	0	0	0	0	0.00207476	0.00205733	0	0.00020922	0	0	0	0	3.48699e-05	0.00024409	0	0.00024409	0.000156915	0	0.000313829	0	0	0	0	0	0	0	0	0	0	0	0	0.000226655	0	k__Bacteria;p__Firmicutes;c__Bacilli;o__Erysipelotrichales;f__Erysipelotrichaceae;g__Turicibacter;s__
OTU_85	0.000278959	1.7435e-05	0.00013948	5.23049e-05	0	0	0.0013948	0.00010461	5.23049e-05	0.000191785	8.71748e-05	8.71748e-05	3.48699e-05	5.23049e-05	8.71748e-05	0	0.000122045	0	1.7435e-05	0.00013948	0.00010461	0.00013948	0.00118558	0.00013948	0.000836878	8.71748e-05	8.71748e-05	8.71748e-05	6.97399e-05	8.71748e-05	8.71748e-05	3.48699e-05	0.00024409	0.000156915	0.000122045	6.97399e-05	k__Bacteria;p__Firmicutes;c__Bacilli;o__Lactobacillales;f__Streptococcaceae;g__Streptococcus
OTU_86	0	0.000383569	0.000191785	0	3.48699e-05	0.000366134	0	0	0	0	0.000156915	0.000122045	0	0.000331264	0.00010461	0	0.000296394	0.000453309	0	0.000401004	0.00020922	0	6.97399e-05	1.7435e-05	0	6.97399e-05	0.000662529	0	0.00010461	0.00017435	0	0.000767139	5.23049e-05	0	0.000261525	0.00010461	k__Bacteria;p__Proteobacteria;c__Gammaproteobacteria;o__Burkholderiales;f__Oxalobacteraceae;g__Massilia
OTU_87	5.23049e-05	3.48699e-05	0.00102866	0	6.97399e-05	0.000191785	0	0	0	0	0.00013948	0.000313829	0	6.97399e-05	0.000732269	0	0.000732269	0.00017435	0	0.000296394	0.000784574	0	0	0.000313829	0	3.48699e-05	0.000296394	0	0	0.000714834	0	0.00439361	0	0	0.000226655	0.000296394	k__Bacteria;p__Myxococcota;c__Polyangia;o__Polyangiales;f__BIrii41;g__;s__
OTU_88	5.23049e-05	3.48699e-05	1.7435e-05	0	1.7435e-05	0	0	0.00181324	0.000924053	3.48699e-05	0.000470744	1.7435e-05	0	0	0	0	0.000401004	6.97399e-05	0.000348699	0.000418439	0	6.97399e-05	0	1.7435e-05	0.00013948	6.97399e-05	1.7435e-05	3.48699e-05	1.7435e-05	3.48699e-05	0	0	5.23049e-05	5.23049e-05	0.000749704	0	k__Bacteria;p__Firmicutes;c__Clostridia;o__Clostridiales;f__Clostridiaceae;g__Clostridium_sensu_stricto_1;s__
OTU_89	0	0	0	0	0	0	0	0.00273729	0.00226655	0	0	0	0	0	0	0	6.97399e-05	0	0.000156915	0.00013948	0	3.48699e-05	0	0	0	0	0	0	0	0	0	0	0	0	0	0	k__Bacteria;p__Bacteroidota;c__Bacteroidia;o__Bacteroidales;f__Muribaculaceae;g__;s__
OTU_90	0	0	0	0	0	0	0	0.0024932	0.00282446	0	0	0	6.97399e-05	0	0	0	0	0	5.23049e-05	3.48699e-05	0	6.97399e-05	0	0	0	0	0	0	0	0	0	0	0	0	0	0	k__Bacteria;p__Firmicutes;c__Clostridia;o__Lachnospirales;f__Lachnospiraceae;g__Lachnospiraceae_NK4A136_group;s__Trichinella_pseudospiralis
OTU_91	0	0.00263268	0.00120301	0	0.000122045	0.000278959	3.48699e-05	0	0	0	0.00013948	0.0017958	0	0.00346956	0.00130762	0	0.000714834	0.000836878	0	0.000435874	0.000191785	0	0.000435874	8.71748e-05	0	5.23049e-05	0.000296394	0	0	0.000331264	0	0.000540484	0.000226655	0	0.000191785	0.00160402	k__Bacteria;p__Proteobacteria;c__Gammaproteobacteria;o__Burkholderiales;f__Oxalobacteraceae;g__Massilia;s__Massilia_sp_WG5
OTU_92	3.48699e-05	0	0	5.23049e-05	0	0	0.00120301	0.00010461	6.97399e-05	0.00010461	0	0	0	0	0	0	0	0	0	1.7435e-05	0	0	0	0	0.00158658	0	0	0.00017435	0	0	0.000156915	0	0	0.00013948	0	0	k__Bacteria;p__Firmicutes;c__Clostridia;o__Lachnospirales;f__Lachnospiraceae;g__Dorea;s__
OTU_93	0.000122045	0.00020922	0.000261525	0.00017435	0.00010461	0.00010461	0.00013948	0	0	0.000348699	0	0	0	0	0	0	1.7435e-05	0	0	0	0.000505614	0	3.48699e-05	0	0.00020922	0	0	0.00254551	0.00266755	0.00169119	0.000331264	0.000191785	0.000122045	0.00024409	0.000278959	0.000226655	k__Bacteria;p__Proteobacteria;c__Gammaproteobacteria;o__Pseudomonadales;f__Moraxellaceae;g__Acinetobacter
OTU_94	0	0.000122045	0.000645094	0	0.00013948	6.97399e-05	0	0	0	0	0.000156915	0.000802009	3.48699e-05	8.71748e-05	0.000557919	0	0.000645094	0.000453309	0	0.000278959	0.000836878	0	0.00010461	0.000523049	1.7435e-05	0.00020922	0.00017435	0	5.23049e-05	0.000470744	6.97399e-05	0.00500384	0.00010461	0	8.71748e-05	0.000836878	k__Bacteria;p__Proteobacteria;c__Alphaproteobacteria;o__Rhizobiales;f__Devosiaceae;g__Devosia;s__
OTU_95	0	0	0	0	0	0	0	0.000331264	0.00142967	0	0.000488179	0	0	0	0	0	0	0	1.7435e-05	0	0	0	0	0	0	0	0	0	0	0	0	0	0	0	0.000836878	0	k__Bacteria;p__Bacteroidota;c__Bacteroidia;o__Bacteroidales;f__Prevotellaceae;g__Prevotellaceae_Ga6A1_group;s__
OTU_96	0	0	0	0	0	0	0	0	0	0	1.7435e-05	0	0	0	0	0	0	0	0	0	0	0	0	0	0	0	0	0	0	0	0	0	0	0	0.00247577	0	k__Bacteria
OTU_97	0	6.97399e-05	6.97399e-05	0	0.00017435	0.000261525	0	0	0	0	5.23049e-05	0.000156915	1.7435e-05	0	0	0	0.00020922	0.000784574	0	0.000156915	0	0	0	8.71748e-05	0	6.97399e-05	0.000226655	0	0	5.23049e-05	0	0.00017435	5.23049e-05	0	6.97399e-05	0.000191785	k__Bacteria;p__Proteobacteria;c__Alphaproteobacteria;o__Reyranellales;f__Reyranellaceae;g__Reyranella
OTU_98	0	3.48699e-05	8.71748e-05	0	0.000296394	0.000505614	0	0	0	0	1.7435e-05	8.71748e-05	5.23049e-05	5.23049e-05	1.7435e-05	0	0.000331264	0.00010461	0.000122045	0.000767139	0.000697399	0	6.97399e-05	5.23049e-05	5.23049e-05	0	0.00010461	0	0	6.97399e-05	1.7435e-05	0.000226655	5.23049e-05	0	8.71748e-05	0.00010461	k__Bacteria;p__Proteobacteria;c__Alphaproteobacteria;o__Sphingomonadales;f__Sphingomonadaceae;g__Sphingobium;s__Sphingobium_xenophagum
OTU_99	0	0	0	0	0	0	0	0.00172606	0.00170863	0	8.71748e-05	0	5.23049e-05	0	0	6.97399e-05	0.00013948	0	0.000122045	0	0	0.000226655	0	0	0	0	0	0	0	0	0	0	0	0	0.000191785	0	k__Bacteria;p__Firmicutes;c__Bacilli;o__Lactobacillales;f__Lactobacillaceae;g__Lactobacillus;s__Lactobacillus_murinus
OTU_100	0	3.48699e-05	0.000488179	0	0.000331264	0.00024409	0	0	0	0	0.000191785	0.00020922	8.71748e-05	0	0.000191785	0	0.000488179	0.000313829	0	0.00010461	8.71748e-05	0	0.000191785	5.23049e-05	0	0.000470744	0.000401004	0	3.48699e-05	5.23049e-05	0	0.000418439	8.71748e-05	1.7435e-05	0.000296394	0.000278959	k__Bacteria;p__Proteobacteria;c__Alphaproteobacteria;o__Caulobacterales;f__Hyphomonadaceae;g__Hirschia;s__
OTU_101	0	0.000156915	0.00017435	0	0.000191785	6.97399e-05	0	0	0	0	6.97399e-05	0.000261525	0	0.00017435	0.000122045	0	0.000261525	0.000418439	0	5.23049e-05	0.00017435	0	0.00010461	0.000191785	0	0.00010461	8.71748e-05	0	0	0.00010461	0	0.00169119	6.97399e-05	0	5.23049e-05	0.00020922	k__Bacteria;p__Proteobacteria;c__Alphaproteobacteria;o__Rhizobiales;f__Rhizobiaceae;g__Allorhizobium-Neorhizobium-Pararhizobium-Rhizobium
OTU_102	0	0	0	0	1.7435e-05	0	0	0	0	0	5.23049e-05	1.7435e-05	0	6.97399e-05	3.48699e-05	0	0	5.23049e-05	0	0	0.00155171	0	1.7435e-05	5.23049e-05	0	5.23049e-05	0	0	0	6.97399e-05	0	0	0	0	1.7435e-05	3.48699e-05	k__Bacteria;p__Proteobacteria;c__Alphaproteobacteria;o__Rhizobiales;f__Beijerinckiaceae;g__Methylobacterium-Methylorubrum;s__Methylorubrum_extorquens
OTU_103	0	1.7435e-05	0.000156915	0	0.00013948	0.000348699	0	0	0	0	0.000348699	0.00020922	0	5.23049e-05	0.000122045	0	0.00017435	0.000278959	0	6.97399e-05	1.7435e-05	0	0	5.23049e-05	0	0.00020922	0.000453309	0	3.48699e-05	0	0	0.00013948	0	0	0.000610224	8.71748e-05	k__Bacteria;p__Actinobacteriota;c__Actinobacteria;o__Micromonosporales;f__Micromonosporaceae
OTU_104	0	8.71748e-05	0.000191785	0	0.00024409	0.000226655	0	0	0	0	0.00024409	0.000226655	0	6.97399e-05	8.71748e-05	0	0.000156915	0.00017435	0	0.000191785	0.00013948	0	5.23049e-05	0.000156915	0	0.00013948	0.000191785	0	0	8.71748e-05	0	0.000749704	5.23049e-05	0	0.000296394	0.000261525	k__Bacteria;p__Actinobacteriota;c__Actinobacteria;o__Propionibacteriales;f__Nocardioidaceae;g__Kribbella
OTU_105	0	0	0	0	3.48699e-05	3.48699e-05	0	0	0	0	1.7435e-05	0	0	0	0	0	0.00010461	0.00017435	0	0	0.000156915	0	0	0	0	3.48699e-05	0	0	0	0.000191785	0	0.00205733	0	0	5.23049e-05	0	k__Bacteria;p__Verrucomicrobiota;c__Verrucomicrobiae;o__Pedosphaerales;f__Pedosphaeraceae;g__;s__
OTU_106	0	0.00024409	6.97399e-05	0	0.00017435	0.00013948	0	0	0	3.48699e-05	0.000383569	0.00010461	0	0.000156915	1.7435e-05	0	0.000122045	0.000122045	0	0.00010461	0.00020922	0	3.48699e-05	0.00020922	0	0.000226655	0.000331264	0	0	0.00017435	0	0.000261525	0	0	0.000453309	5.23049e-05	k__Bacteria;p__Gemmatimonadetes;c__unidentified_Gemmatimonadetes;o__Gemmatimonadales;f__Gemmatimonadaceae;g__Gemmatimonas;s__
OTU_107	0.00010461	0	0	0.000226655	0	0	0.000488179	0.000645094	0.000418439	6.97399e-05	0	0	0	0	0	0	0.00024409	0	0	0	0	0	0	0	0	0	0	0	0	0	1.7435e-05	0.00020922	0	1.7435e-05	0	0	k__Bacteria;p__Proteobacteria
OTU_108	0	0.00020922	0	0	0	0	0	0	0	0	8.71748e-05	0.000261525	0	0.00142967	0.000156915	0	5.23049e-05	0.00013948	0	0	0.00010461	0	3.48699e-05	0.000122045	0	8.71748e-05	0.000191785	0	0	0	0	0	0	0	0	0	k__Bacteria;p__Proteobacteria;c__Gammaproteobacteria;o__Pseudomonadales;f__Moraxellaceae;g__Acinetobacter;s__Acinetobacter_baylyi
OTU_109	0	0.00013948	0.00123788	0.000156915	0.000348699	0.000331264	0.000261525	1.7435e-05	0	0.000261525	0.00013948	0.000575354	6.97399e-05	0.000156915	0.00197015	1.7435e-05	0.000191785	0.000226655	0.00245833	0	0.000226655	0.00013948	0.000575354	0.00017435	0.000523049	0.000575354	0.00017435	0.00010461	0	0.000366134	0.00024409	0.000610224	0.00013948	0.00130762	0.000348699	0.00265012	k__Bacteria;p__Proteobacteria;c__Gammaproteobacteria;o__Xanthomonadales;f__Xanthomonadaceae;g__Stenotrophomonas;s__Stenotrophomonas_chelatiphaga
OTU_110	0	3.48699e-05	3.48699e-05	0	8.71748e-05	0	0	0	0	0	0	1.7435e-05	0	0	1.7435e-05	0	0.00013948	1.7435e-05	0	0.00010461	0.000156915	0	0.000122045	0.000191785	0	0	5.23049e-05	0	0	0.000122045	0	0.00425413	8.71748e-05	0	0	1.7435e-05	k__Bacteria;p__Bacteroidota;c__Bacteroidia;o__Chitinophagales;f__Chitinophagaceae;g__Flavisolibacter;s__Flavisolibacter_ginsengisoli
OTU_111	0	8.71748e-05	0.00020922	0	0	5.23049e-05	0	0	0	0	0	6.97399e-05	0	5.23049e-05	6.97399e-05	0	0.000993793	8.71748e-05	0	0.00130762	0	0	0	3.48699e-05	0	5.23049e-05	0.00013948	0	0	0	0	0.00020922	0	0	0	0.00010461	k__Bacteria;p__Bacteroidota;c__Bacteroidia;o__Chitinophagales;f__Chitinophagaceae;g__Aurantisolimonas;s__
OTU_112	0	1.7435e-05	5.23049e-05	0	1.7435e-05	0.000122045	0	0	0	0	3.48699e-05	0.00102866	0	1.7435e-05	6.97399e-05	0	0.000488179	0.000592789	0	6.97399e-05	1.7435e-05	0	0	0	0	0	3.48699e-05	0	0	0	0	0.00020922	0	0	6.97399e-05	0.000732269	k__Bacteria;p__Proteobacteria;c__Gammaproteobacteria;o__Xanthomonadales;f__Xanthomonadaceae
OTU_113	0	1.7435e-05	0	0	0	0	0	0	0	0	0	0	0	0	0	0	0	0	0	0	0	0	0	0	0	0	0	0	0	0	0	0.00322547	0	0	0	0	k__Bacteria
OTU_114	0	0	0	0	0.00294651	0	0	0	0	0	0	0	0	0	0	0	0	0	0	0	0	0	0	0	0	6.97399e-05	0	0	0	3.48699e-05	0	0	3.48699e-05	0	8.71748e-05	0	k__Bacteria;p__Bacteroidota;c__Bacteroidia;o__Bacteroidales;f__Muribaculaceae;g__;s__
OTU_115	8.71748e-05	0	0	0.00013948	0	0	0.00296394	0	0	0.000331264	0	0	0	0	0	0	0	0	0	1.7435e-05	0	0	0	0	0.000383569	0	0	0.000435874	0	0	0.000366134	0	0	0.000122045	0	0	k__Bacteria;p__Firmicutes;c__Clostridia;o__Lachnospirales;f__Lachnospiraceae;g__[Eubacterium]_hallii_group;s__
OTU_116	0	0	0.000156915	0	0	0	0	0.00153428	0.00148197	0	0.00010461	0	0	0	5.23049e-05	6.97399e-05	0.000401004	0	1.7435e-05	0.000261525	0	6.97399e-05	0	1.7435e-05	0	1.7435e-05	0	0	0.000313829	1.7435e-05	0	0	0	0	8.71748e-05	5.23049e-05	k__Bacteria;p__Firmicutes;c__Clostridia;o__Peptostreptococcales-Tissierellales;f__Peptostreptococcaceae;g__Romboutsia;s__Romboutsia_ilealis
OTU_117	0	0	0	0	6.97399e-05	0	0	0	0	0	3.48699e-05	0	0	5.23049e-05	0	0	0	1.7435e-05	0	0	0	0	0	3.48699e-05	0	0.00191785	0	0	0	0	0	0	0	0	0	0	k__Bacteria;p__Proteobacteria;c__Alphaproteobacteria;o__Acetobacterales;f__Acetobacteraceae;g__Rubritepida;s__
OTU_118	0	0	1.7435e-05	0	0	0.000122045	0	0	0	0	0.000331264	5.23049e-05	0	0	0	0	0.000122045	0.00020922	0	3.48699e-05	1.7435e-05	0	1.7435e-05	1.7435e-05	0	1.7435e-05	0.00010461	0	0	6.97399e-05	0	0.00134249	0	0	0.00017435	3.48699e-05	k__Bacteria;p__unidentified_Bacteria;c__Alphaproteobacteria;o__Reyranellales;f__Reyranellaceae;g__;s__
OTU_119	0.000366134	8.71748e-05	5.23049e-05	6.97399e-05	5.23049e-05	0.000505614	0.00010461	0.00013948	0.000156915	6.97399e-05	0.000802009	5.23049e-05	0	6.97399e-05	3.48699e-05	0	6.97399e-05	0.00153428	0	0.000156915	0.00013948	0.000156915	0.000383569	0.00013948	0.00020922	0.00017435	0.00017435	6.97399e-05	0	6.97399e-05	0.00020922	0.000191785	8.71748e-05	5.23049e-05	0.00013948	5.23049e-05	k__Bacteria;p__Cyanobacteria;c__Cyanobacteriia;o__Chloroplast;f__unidentified_Chloroplast;g__unidentified_Chloroplast;s__Citrus_maxima
OTU_120	6.97399e-05	0	0	6.97399e-05	0	0	0.000906618	0	0	0.00020922	0	0	0	0	0	0	0	0	0	0	0	0	0	0	0.000453309	0	0	8.71748e-05	0	0	0.00017435	0	0	5.23049e-05	0	0	k__Bacteria;p__Firmicutes;c__Clostridia;o__unidentified_Clostridia;f__Ruminococcaceae;g__;s__
OTU_121	0	8.71748e-05	0.00010461	0	1.7435e-05	0.00024409	0	0	0	0	6.97399e-05	0.000226655	0	1.7435e-05	5.23049e-05	0	0.000313829	8.71748e-05	0	0.000156915	0.000278959	0	6.97399e-05	6.97399e-05	0	6.97399e-05	0.000488179	0	0	0.000383569	0	0.00127275	3.48699e-05	0	0	0.000191785	k__Bacteria
OTU_122	0	0	0	0	0	0	0	0.00338238	0.00153428	0	0	0	0	0	0	1.7435e-05	1.7435e-05	0	0.000313829	5.23049e-05	0	0	0	0	0	0	0	0	0	0	0	0	0	0	0	0	k__Bacteria;p__Firmicutes;c__Clostridia;o__Lachnospirales;f__Lachnospiraceae;g__Lachnospiraceae_NK4A136_group;s__
OTU_123	8.71748e-05	0	0	0	0	0	0	0	0	1.7435e-05	0	0	0	0	0	0	0	0	0	0.000435874	0	0	0	0	0.000575354	0	0	0.000435874	0	0	0	0.000958923	0	0	0	0	k__Bacteria
OTU_124	0	3.48699e-05	0.000366134	0	6.97399e-05	0.000122045	0	0	0	0	6.97399e-05	0.000470744	1.7435e-05	8.71748e-05	0.000296394	0	0.000627659	0.000156915	0	0.000278959	0.00024409	0	0.00010461	0.000261525	0	1.7435e-05	3.48699e-05	0	3.48699e-05	0.000278959	0	0.00247577	0.00010461	0	0.00010461	0.000505614	k__Bacteria
OTU_125	0	5.23049e-05	0.000261525	0	0.00020922	0.000296394	0	0	0	0	0.000488179	0.000278959	3.48699e-05	0.000122045	0.000348699	0	0.00017435	0.000453309	0	0.00020922	6.97399e-05	0	3.48699e-05	0.000122045	0	0.000348699	0.000592789	0	1.7435e-05	8.71748e-05	0	0.000156915	0	1.7435e-05	0.000836878	0.000278959	k__Bacteria;p__Actinobacteriota;c__Actinobacteria;o__Micromonosporales;f__Micromonosporaceae
OTU_126	0.00020922	0	0	0.00020922	0	0	8.71748e-05	0	0	0.000331264	0	0	0	0	0	0	0	0	0	0	0	0	0	0	0.0010461	0	0	0.000993793	0	0	0.000732269	0	0	0.000418439	0	0	k__Bacteria;p__Firmicutes;c__Bacilli;o__Lactobacillales;f__Carnobacteriaceae;g__Trichococcus;s__
OTU_127	0	0	0	0	0	0	0	0	0	0	0	0	3.48699e-05	0	0	3.48699e-05	0	0	0.00252807	0	0	1.7435e-05	0	0	0	0	0	0	0	0	3.48699e-05	0	0	0	0	0	k__Bacteria;p__Proteobacteria;c__Gammaproteobacteria;o__Burkholderiales;f__Neisseriaceae;g__Neisseria;s__Neisseria_elongata
OTU_128	0	0	0	0	0	0	0	0.00115071	0.00113327	0	0	0	6.97399e-05	0	0	0.000122045	3.48699e-05	0	0.000191785	0	0	0.000122045	0	0	0	0	0	0	0	0	0	0	0	0	0	0	k__Bacteria;p__Actinobacteriota;c__Coriobacteriia;o__Coriobacteriales;f__Atopobiaceae;g__Coriobacteriaceae_UCG-002;s__
OTU_129	0	0.000122045	0.000278959	0	0.00024409	0.00024409	0	0	0	0	0.000156915	0.000488179	0	0.00017435	0.000313829	0	0	0	0	0.000348699	0	0	0	3.48699e-05	0	0.000278959	0.000313829	0	0	1.7435e-05	0	0.00013948	0	0	0.000226655	0.000470744	k__Bacteria;p__unidentified_Bacteria;c__Alphaproteobacteria;o__Acetobacterales;f__Acetobacteraceae;g__;s__
OTU_130	0	0	0.00010461	0	3.48699e-05	0.000122045	0	0	0	0	0.000226655	0.00013948	0	0	8.71748e-05	0	6.97399e-05	0.000453309	0	3.48699e-05	6.97399e-05	0	0	0.000331264	0	0.000122045	0.000156915	0	1.7435e-05	0.000122045	0	0.000645094	0	0	0.000156915	0.000122045	k__Bacteria;p__Proteobacteria;c__Alphaproteobacteria;o__Rhizobiales;f__Xanthobacteraceae;g__Pseudolabrys;s__
OTU_131	0	0	6.97399e-05	5.23049e-05	0	0	0.000366134	0.00141223	0.000836878	0.00010461	3.48699e-05	0.00017435	0.00010461	6.97399e-05	0.00101123	3.48699e-05	6.97399e-05	3.48699e-05	0	0.000627659	1.7435e-05	0	0.000156915	3.48699e-05	0.000122045	6.97399e-05	0.00010461	0	0	0	0	0	0	0	0	0	k__Bacteria;p__Firmicutes;c__Clostridia;o__Oscillospirales;f__[Eubacterium]_coprostanoligenes_group;g__;s__
OTU_132	0.000156915	0	0	0.000557919	0	0	0.00010461	0.00020922	0	3.48699e-05	0	0	0	0	0	0	0	0	0	0.000191785	0	0	0	0	0.000383569	0	0	0.00017435	0	0	1.7435e-05	0	0	0.000679964	0	0	k__Bacteria
OTU_133	6.97399e-05	0	0.000627659	0.00020922	0	0	0.000505614	0	1.7435e-05	3.48699e-05	0	0.00010461	3.48699e-05	1.7435e-05	0.000540484	0	0.00024409	5.23049e-05	0	0	5.23049e-05	0	0	0	0.000122045	3.48699e-05	0	0.000296394	3.48699e-05	6.97399e-05	0.000348699	5.23049e-05	0	0.000627659	0	0.000122045	k__Bacteria;p__Proteobacteria;c__Alphaproteobacteria;o__Caulobacterales;f__Caulobacteraceae;g__Brevundimonas;s__Brevundimonas_terrae
OTU_134	0	0	0	0	0	0	0	3.48699e-05	0.000296394	8.71748e-05	0	0	0	0	0	0	0.000453309	0	0	6.97399e-05	0	0	0	0	0	0	0	0	0	0	0.00013948	0.000697399	1.7435e-05	0	0	0	k__Bacteria
OTU_135	0	0.000488179	0.000557919	0	0.000610224	0.0010984	0	0	0	0	0.000871748	0.000784574	0	0.000557919	0.000819443	0	0.000557919	0.000470744	0	0.000767139	0	0	0	0.000226655	0	0.000802009	0.00135993	0	0.000278959	0	0	0.000819443	0	0	0.000802009	0.000871748	k__Bacteria;p__Proteobacteria;c__Gammaproteobacteria;o__Xanthomonadales;f__Rhodanobacteraceae;g__Rhodanobacter;s__Rhodanobacter_sp
OTU_136	0	0	0	0.00247577	0	0	6.97399e-05	0	0	5.23049e-05	0	0	0	1.7435e-05	0	1.7435e-05	0	0	0	0	5.23049e-05	0	0	0	0.00013948	0	0	0.00017435	0	0	0.00010461	0	0	0.00141223	0	0	k__Bacteria;p__Actinobacteriota;c__Actinobacteria;o__Corynebacteriales;f__Corynebacteriaceae;g__Corynebacterium
OTU_137	0	0	0	1.7435e-05	0	0	0.00123788	0	0	0.000627659	0	0	0	0	0	0	0	0	0	0	0	0	0	0	0.000976358	0	0	5.23049e-05	0	0	0.000122045	0	0	5.23049e-05	0	0	k__Bacteria;p__Bacteroidota;c__Bacteroidia;o__Bacteroidales;f__Bacteroidaceae;g__Bacteroides;s__Bacteroides_stercoris
OTU_138	0	0	1.7435e-05	0	0	0	0	0	0	0	0	0	0	0	0	0	8.71748e-05	0	0	8.71748e-05	0	0	0	0	0	0	0	0	0	1.7435e-05	0	0.00247577	0	0	1.7435e-05	0	k__Bacteria;p__Myxococcota;c__Polyangia;o__Polyangiales;f__Polyangiaceae;g__Pajaroellobacter;s__
OTU_139	0	0	0	3.48699e-05	0	0	0.0017435	0.00010461	0.00010461	0.00024409	0.00013948	0	0	0	0	0	0	0	0	0	0	0	0	0	0.000313829	0	0	6.97399e-05	0	0	8.71748e-05	0	0	3.48699e-05	0.000261525	0	k__Bacteria;p__Firmicutes;c__Clostridia;o__Clostridia_UCG-014;f__;g__;s__
OTU_140	0	0	0	0	0	0	0	0.000191785	0	0	0	0	0	0	0	0	0.000575354	0	0	0.000610224	0	0	0	0	0	0	0	0	0	0	0	0.00020922	0	0	0	0	k__Bacteria
OTU_141	0	0	0	0	0	0	0	3.48699e-05	3.48699e-05	0	0	0	0.00392287	0	0	0	0	0	0	0	0	1.7435e-05	0	0	0	0	0	0	0	0	0	0	0	0	0	0	k__Bacteria;p__Proteobacteria;c__Gammaproteobacteria;o__Oceanospirillales;f__Halomonadaceae;g__Halomonas
OTU_142	0	0	0	0	0	0	0	0	0	0	0	0	0	0	0	0	0	0	0	0	0	0	0.000993793	0	0	0	0	0	0	0	0	0	0.0010984	0	0	0	k__Bacteria;p__Cyanobacteria;c__Cyanobacteriia;o__Cyanobacteriales;f__Phormidiaceae;g__Tychonema_CCAP_1459-11B;s__
OTU_143	5.23049e-05	6.97399e-05	0.000296394	1.7435e-05	0.000156915	0.000226655	0	0	0	0.000156915	5.23049e-05	0.000296394	3.48699e-05	5.23049e-05	0.000313829	0	0.000697399	0.000278959	0	0.00017435	0.000226655	0	5.23049e-05	0.000191785	0.00017435	0.00017435	0.000156915	0.000156915	3.48699e-05	0.000122045	0.000278959	0.000802009	3.48699e-05	0.000401004	8.71748e-05	0.000226655	k__Bacteria;p__Proteobacteria;c__Alphaproteobacteria;o__Rhizobiales;f__Rhizobiaceae;g__Aminobacter;s__Aminobacter_aminovorans
OTU_144	5.23049e-05	0	1.7435e-05	0.000122045	1.7435e-05	8.71748e-05	0	3.48699e-05	0.00017435	3.48699e-05	0	0	0	0	0	0	0.000627659	0	0	0	0	0	0	0	0.000191785	0	1.7435e-05	0	0	0	0	0	0	0	0.000226655	0	k__Bacteria
OTU_145	3.48699e-05	0	0	6.97399e-05	0	0	0.000366134	0.000191785	0.000278959	3.48699e-05	0.00020922	0	0	0	0	0	0.000191785	0	0.000156915	0.000348699	0	3.48699e-05	0	0	6.97399e-05	0	0	3.48699e-05	0	0	0	0	0	3.48699e-05	0.000226655	0	k__Bacteria;p__Proteobacteria;c__Gammaproteobacteria;o__Burkholderiales;f__Sutterellaceae;g__Parasutterella;s__
OTU_146	0	0	0	0	0	0	0	0.000645094	0.000592789	0	0	0	0.000296394	0	0	0	0	0	0	0	0	0	0	0	0	0	0	0	0	0	0	0	0	0	0	0	k__Bacteria;p__Firmicutes;c__Clostridia;o__Lachnospirales;f__Lachnospiraceae;g__Roseburia;s__Roseburia_sp_499
OTU_147	0	0	5.23049e-05	0	0.000122045	0.000156915	0	0	0	0	0.000401004	6.97399e-05	0	0	5.23049e-05	0	3.48699e-05	3.48699e-05	0	0	0	0	0	0	0	0.000156915	0.000191785	0	3.48699e-05	1.7435e-05	0	5.23049e-05	0	0	0.000191785	6.97399e-05	k__Bacteria;p__Actinobacteriota;c__Actinobacteria;o__Streptosporangiales;f__Thermomonosporaceae;g__Actinomadura;s__
OTU_148	0	8.71748e-05	0.000261525	0	0.000226655	8.71748e-05	0	0	0	0	0.000313829	0.000296394	0	5.23049e-05	0.000261525	0	5.23049e-05	0	0	0.000313829	0	0	0	0	0	0.00017435	0.00013948	0	0	0	0	0.0014471	0	0	0.000366134	0.000278959	k__Bacteria;p__Actinobacteriota;c__Actinobacteria;o__Frankiales;f__Acidothermaceae;g__Acidothermus;s__
OTU_149	0	0	0	0	0	0	0	0.00132506	0.000662529	0	0	0	0	0	0	0	0	0	1.7435e-05	0	0	3.48699e-05	0	0	0	0	0	0	0	0	0	0	0	0	0	0	k__Bacteria;p__Bacteroidota;c__Bacteroidia;o__Bacteroidales;f__Muribaculaceae;g__;s__
OTU_150	0.00125532	0	0	0.00299881	0	0	0.00148197	0	0	3.48699e-05	0	1.7435e-05	0	0	1.7435e-05	0	0	8.71748e-05	0	0	0	0	0	0	6.97399e-05	0	0	0.000122045	0	0	0.00160402	0	0	0.00268499	0	5.23049e-05	k__Bacteria;p__Proteobacteria;c__Gammaproteobacteria;o__Burkholderiales;f__Oxalobacteraceae;g__Duganella;s__
OTU_151	0	8.71748e-05	0	0	8.71748e-05	0.00024409	0	0	0	0	8.71748e-05	0	0	0.00013948	1.7435e-05	0	0	0.00013948	0	0	0	0	0.000418439	6.97399e-05	0	8.71748e-05	0.000296394	0	0	0	0	0	0.000313829	0	0.00010461	0	k__Bacteria;p__Actinobacteriota;c__Acidimicrobiia;o__Microtrichales;f__Ilumatobacteraceae;g__Ilumatobacter;s__
OTU_152	0	0	0	0	0	0	1.7435e-05	0.000679964	0.000366134	0	0.000819443	0	0	0	0	3.48699e-05	5.23049e-05	0	0.000226655	0.00013948	0	0.000418439	0	0	0	0	0	0	0	0	0	0	0	0	0.00127275	0	k__Bacteria;p__Firmicutes;c__Bacilli;o__Lactobacillales;f__Lactobacillaceae;g__Lactobacillus;s__Lactobacillus_reuteri
OTU_153	0	0	0	0	0	0	0	0	0	0	0	0	0.00176093	0	0	0	0	0	0	0	0	0	0	0	0	0	0	0	0	0	0	0	0	0	0	0	k__Bacteria;p__Proteobacteria;c__Gammaproteobacteria;o__Alteromonadales;f__Idiomarinaceae;g__Idiomarina
OTU_154	0	0	0	0	0	0	0	0.0017435	0.0010984	0	1.7435e-05	0	0	0	0	0	0	0	0	1.7435e-05	0	3.48699e-05	0	0	0	0	0	0	0	0	0	0	0	0	3.48699e-05	0	k__Bacteria;p__Bacteroidota;c__Bacteroidia;o__Bacteroidales;f__Muribaculaceae;g__;s__
OTU_155	0	0	6.97399e-05	0	5.23049e-05	0.000122045	0	0	0	0	6.97399e-05	0.000122045	0	1.7435e-05	8.71748e-05	0	0	0.000348699	0	0.000296394	0	0	0	0.00010461	0	1.7435e-05	0.000122045	0	8.71748e-05	3.48699e-05	0	0.000383569	0	0	0.00013948	0.00017435	k__Bacteria;p__unidentified_Bacteria;c__Alphaproteobacteria;o__Micropepsales;f__Micropepsaceae;g__;s__
OTU_156	0	0	0	0	0	0	0	0.00125532	0.000802009	0	0	0	1.7435e-05	0	0	8.71748e-05	0	0	3.48699e-05	0	0	1.7435e-05	0	0	0	0	0	0	0	0	0	0	0	0	0	0	k__Bacteria;p__Firmicutes;c__Clostridia;o__Oscillospirales;f__Ruminococcaceae;g__Anaerotruncus;s__
OTU_157	0	0.00010461	0.00013948	3.48699e-05	0.00010461	8.71748e-05	0	0	3.48699e-05	3.48699e-05	0.00013948	0.000226655	0	0.00010461	0.000261525	0	0.000383569	0.000453309	0	0.000191785	0.00024409	0	0.00020922	0.000191785	1.7435e-05	6.97399e-05	0.00017435	0	3.48699e-05	0.000278959	1.7435e-05	0.000401004	0.000156915	0	0.00010461	0.00024409	k__Bacteria;p__Proteobacteria;c__Alphaproteobacteria;o__Rhizobiales;f__Rhizobiaceae;g__Mesorhizobium
OTU_158	8.71748e-05	0.00020922	1.7435e-05	3.48699e-05	0.000156915	6.97399e-05	0	0	0	3.48699e-05	0.00010461	0	0	0.00020922	0.00013948	0	0.00024409	3.48699e-05	0	0.00020922	0.00020922	0	0.00020922	0.000366134	3.48699e-05	8.71748e-05	3.48699e-05	0.000156915	0	0.000383569	8.71748e-05	0.00474231	0.000348699	0.000122045	0.00010461	3.48699e-05	k__Bacteria;p__Actinobacteriota;c__Actinobacteria;o__Micrococcales;f__Intrasporangiaceae;g__Phycicoccus;s__
OTU_159	0.00010461	0	0	0.000156915	0	0	0.00237116	0.000191785	0.00010461	0.00020922	0	0	0	0	0	0	0	0	0	0	0	0	0	0	0.00115071	0	0	0.00020922	0	0	0.00024409	0	0	0.00017435	1.7435e-05	0	k__Bacteria;p__Firmicutes;c__Clostridia;o__Lachnospirales;f__Lachnospiraceae;g__[Ruminococcus]_torques_group;s__
OTU_160	0.00010461	0	0	8.71748e-05	0	0	0.000557919	0	0	0.00010461	0	0	1.7435e-05	0	0	0	0	0	0	0	0	0	0	1.7435e-05	0.000906618	0	0	8.71748e-05	0	0	6.97399e-05	0	0	0.00010461	0	0	k__Bacteria;p__Firmicutes;c__Clostridia;o__Oscillospirales;f__Ruminococcaceae;g__Subdoligranulum;s__
OTU_161	0	0.000261525	0.000366134	0	0.000313829	0.00020922	0	0	0	0	0	0.00010461	5.23049e-05	0.000191785	0.000383569	0	0.000278959	6.97399e-05	0	0.000383569	8.71748e-05	0	0.000156915	0.000122045	0	0.000261525	0.000261525	0	0	5.23049e-05	0	0.000523049	0.00024409	0	0	3.48699e-05	k__Bacteria
OTU_162	1.7435e-05	0.000453309	0.000278959	0.000156915	0.00017435	3.48699e-05	5.23049e-05	0	0	8.71748e-05	6.97399e-05	8.71748e-05	0	0.000819443	0.000470744	0	0.000383569	0.000610224	0	6.97399e-05	0.000156915	0	0.00024409	0.000383569	6.97399e-05	0.000348699	3.48699e-05	0.00010461	0.00013948	0.000122045	0.000122045	0.00013948	0.00024409	0.000122045	0	3.48699e-05	k__Bacteria;p__Proteobacteria;c__Gammaproteobacteria;o__Xanthomonadales;f__Xanthomonadaceae;g__Thermomonas;s__
OTU_163	0.00017435	0.000401004	1.7435e-05	0.00024409	6.97399e-05	0.000488179	0	1.7435e-05	0	0	0	0	0	5.23049e-05	0	0	0	0	0	0.00010461	0	0	0	0	0.000156915	0	0	3.48699e-05	0	0.000122045	3.48699e-05	0.000540484	5.23049e-05	0	5.23049e-05	5.23049e-05	k__Bacteria;p__Firmicutes;c__Bacilli;o__Lactobacillales;f__Lactobacillaceae;g__Lactobacillus;s__Lactobacillus_plantarum
OTU_164	3.48699e-05	0	0	8.71748e-05	0	0	0.00118558	0	0	0.000122045	0	0	0	0	0	0	0	0	0	0	0	0	3.48699e-05	0	0.000540484	1.7435e-05	0	0.000156915	0	0	0.00013948	0	0	0.000156915	0	0	k__Bacteria;p__Firmicutes;c__Clostridia;o__Lachnospirales;f__Lachnospiraceae;g__Anaerostipes;s__Anaerostipes_hadrus
OTU_165	0	0	0	0	1.7435e-05	0.00010461	0.000523049	0.00129019	0.000627659	0	3.48699e-05	0	0	0	0	0	3.48699e-05	0	0	0	0	0	0	0	0	0	0.00013948	0	1.7435e-05	0	0	3.48699e-05	0	0	5.23049e-05	3.48699e-05	k__Bacteria;p__Firmicutes;c__Bacilli;o__Bacillales;f__Bacillaceae;g__Bacillus;s__Bacillus_anthracis
OTU_166	0.00135993	0	0	0	0	0	0	0	0	0.000331264	0	0	0	0	0	0	0	0	0	0	0	0	0	0	0	0	0	6.97399e-05	0	0	0	0	0	0	0	0	Unknown
OTU_167	0	5.23049e-05	0	0	0.00013948	5.23049e-05	0	0	5.23049e-05	0	1.7435e-05	5.23049e-05	0	3.48699e-05	0.00010461	0	0	0.000156915	0	0	0.000697399	0	0	0	0	0.00010461	0	0.00017435	5.23049e-05	0.00017435	0	0	0	0	5.23049e-05	1.7435e-05	k__Bacteria;p__Proteobacteria;c__Gammaproteobacteria;o__Pseudomonadales;f__Moraxellaceae;g__Enhydrobacter;s__Moraxella_osloensis
OTU_168	0	0	0	0	0	0	0	0.00017435	0.00020922	0	0	0	0	0	0	0	0	0	0	3.48699e-05	0	0	0	0	0.000941488	0	0	1.7435e-05	0	0	0	0	0	0	0	0	k__Bacteria
OTU_169	0	0	0	0.00142967	0	0	0	0	0	0	0	0	0	0	0	0	0	0	0	0	0	0	0	0	0	0	0	0.000348699	0	0	0	0	0	0	0	0	k__Bacteria;p__Proteobacteria;c__Alphaproteobacteria;o__Rhodospirillales;f__Rhodospirillaceae;g__Rhodospirillum;s__
OTU_170	0	0	0	8.71748e-05	0	0	0.00102866	0.000697399	0.000313829	5.23049e-05	8.71748e-05	0	3.48699e-05	0	0	5.23049e-05	0	0	0	0	0	0	0	0	0.000191785	0	0	8.71748e-05	0	0	0.000122045	0	0	8.71748e-05	3.48699e-05	0	k__Bacteria;p__Firmicutes;c__Clostridia;o__Oscillospirales;f__[Eubacterium]_coprostanoligenes_group;g__;s__
OTU_171	0	0	0	0	0	0	0	0.00258038	0.00156915	0	0	0	3.48699e-05	0	0	0	0	0	8.71748e-05	0	0	8.71748e-05	0	0	0	0	0	0	0	0	0	0	0	0	0	0	k__Bacteria;p__Firmicutes;c__Clostridia;o__Lachnospirales;f__Lachnospiraceae;g__Lachnospiraceae_NK4A136_group;s__
OTU_172	0	0	0	0	0	0	0	0.000505614	0.000662529	0	0	0	0	0	0	0	0	0	0	0	0	0	0	0	0	0	0	0	0	0	0	0	0	0	0	0	k__Bacteria
OTU_173	0	0	0	0	0	0	0	0.00101123	0.000523049	0	0	0	0	0	0	0	1.7435e-05	0	0.000191785	0	0	0.00017435	0	0	0	0	0	0	0	0	0	0	0	0	1.7435e-05	0	k__Bacteria;p__Firmicutes;c__Bacilli;o__Erysipelotrichales;f__Erysipelotrichaceae;g__Faecalibaculum;s__Faecalibaculum_rodentium
OTU_174	0	0	0	0	0	0	0	0.0013948	0.000470744	0	0	0	0	0	0	0	0	0	0	0	0	3.48699e-05	0	0	0	0	0	0	0	0	0	0	0	0	0	0	k__Bacteria;p__Bacteroidota;c__Bacteroidia;o__Bacteroidales;f__Rikenellaceae;g__Alistipes;s__
OTU_175	0	0	0	0	0	0	0	0.00120301	0.0013948	0	0	0	1.7435e-05	0	0	0	0	0	0.00017435	0	0	5.23049e-05	0	0	0	0	0	0	0	0	0	0	0	0	0	0	k__Bacteria;p__Firmicutes;c__Clostridia;o__Lachnospirales;f__Lachnospiraceae;g__Lachnospiraceae_NK4A136_group;s__
OTU_176	0.000261525	0.00010461	0.000366134	1.7435e-05	0.000383569	0.000401004	0	0	0	0	0	0	0	0	1.7435e-05	0	0.000226655	0	0	0	0	0	0	0	6.97399e-05	5.23049e-05	0	0	0	1.7435e-05	0	0	0.000122045	0	5.23049e-05	8.71748e-05	k__Bacteria;p__Firmicutes;c__Bacilli;o__Lactobacillales;f__Lactobacillaceae;g__Lactobacillus;s__Lactobacillus_brevis
OTU_177	0	0	0	5.23049e-05	0	0.000122045	3.48699e-05	0	0	5.23049e-05	0.000156915	0	0	0	0	0	1.7435e-05	1.7435e-05	0	0	1.7435e-05	0	0	0	5.23049e-05	0	0	6.97399e-05	0	1.7435e-05	0.000418439	1.7435e-05	0	5.23049e-05	0.00017435	0	k__Bacteria;p__Proteobacteria;c__Alphaproteobacteria;o__Rhizobiales;f__Beijerinckiaceae;g__Methylobacterium-Methylorubrum;s__Methylobacterium_brachiatum
OTU_178	0	5.23049e-05	5.23049e-05	0	0.00010461	0.00010461	0	0	0	0	0	0	0	0	3.48699e-05	0	0.000435874	0	0	0.000557919	0	0	0	0	0	6.97399e-05	1.7435e-05	0	0	0	0	0.000278959	0	0	0	3.48699e-05	k__Bacteria;p__Bacteroidota;c__Bacteroidia;o__Chitinophagales;f__Chitinophagaceae;g__Lacibacter;s__
OTU_179	0	0	0	0	0	0	0	0	0	0	0	0	0	0	0	0	6.97399e-05	0	0	8.71748e-05	0	0	0	0	0	0	0	0	0	0	0	0.00165632	0	0	0	0	k__Bacteria;p__unidentified_Bacteria;c__Bacteroidia;o__Chitinophagales;f__Chitinophagaceae;g__;s__
OTU_180	5.23049e-05	1.7435e-05	0.000122045	1.7435e-05	0.000348699	0	0.000523049	0	0.00020922	1.7435e-05	0	3.48699e-05	0	1.7435e-05	0.000122045	0	1.7435e-05	0	0	0	0	0	0	0	0.000348699	0.00020922	5.23049e-05	5.23049e-05	0	0	3.48699e-05	0	1.7435e-05	0.000156915	6.97399e-05	6.97399e-05	k__Bacteria;p__Firmicutes;c__Bacilli;o__Exiguobacterales;f__Exiguobacteraceae;g__Exiguobacterium;s__Exiguobacterium_sp_ZWU0009
OTU_181	0	0	0	0	0	0	0	0.000854313	0.000505614	0	5.23049e-05	0	0	0	0	3.48699e-05	0	0	0.00020922	0	0	0	0	0	0	0	0	0	0	0	0	0	0	0	3.48699e-05	0	k__Bacteria;p__Desulfobacterota;c__Desulfovibrionia;o__Desulfovibrionales;f__Desulfovibrionaceae;g__Desulfovibrio;s__Desulfovibrio_fairfieldensis
OTU_182	0	1.7435e-05	5.23049e-05	0	1.7435e-05	0	0	0	0	0	0	5.23049e-05	0	1.7435e-05	0	0	0.000156915	0	0	1.7435e-05	3.48699e-05	0	0	0	0	0	0	0	0	0.000122045	0	0.00151684	0	0	0	0	k__Bacteria;p__Bacteroidota;c__Bacteroidia;o__Chitinophagales;f__Chitinophagaceae;g__Flavisolibacter;s__
OTU_183	0	1.7435e-05	0.000331264	0	1.7435e-05	0	0	0	0	0	5.23049e-05	0.00017435	0	0	0.000488179	0	0.000261525	1.7435e-05	0	0.00013948	0.000122045	0	6.97399e-05	1.7435e-05	0	3.48699e-05	5.23049e-05	0	0	8.71748e-05	0	0.000523049	3.48699e-05	0	0	0.000261525	k__Bacteria;p__Proteobacteria;c__Gammaproteobacteria;o__Xanthomonadales;f__Rhodanobacteraceae;g__Tahibacter;s__
OTU_184	0	6.97399e-05	0	0	0	1.7435e-05	0	0	0	0	1.7435e-05	5.23049e-05	0	0	1.7435e-05	0	1.7435e-05	5.23049e-05	0	0	0.00017435	0	0	0.000540484	0	5.23049e-05	0	0	0	3.48699e-05	0	0.000523049	0	0	0	5.23049e-05	k__Bacteria;p__Chloroflexi;c__Ktedonobacteria;o__C0119;f__;g__;s__
OTU_185	0	0.000261525	0.000122045	0	6.97399e-05	0.00013948	0	0	0	0	5.23049e-05	8.71748e-05	3.48699e-05	0.000191785	1.7435e-05	0	0.00010461	0.000156915	0	0.00010461	5.23049e-05	0	1.7435e-05	0.000122045	0	0	6.97399e-05	0	0	0.00010461	0	0.000575354	0	0	0.00013948	0.000278959	k__Bacteria;p__Proteobacteria;c__Alphaproteobacteria;o__Caulobacterales;f__Caulobacteraceae;g__Caulobacter
OTU_186	0	0	0	0.00146454	0	0	0.000122045	0	1.7435e-05	0	0	0	0	0	0	0	0	0	0	0	0	0	0	0	0	0	0	1.7435e-05	0	0	0	0	0	0	0	0	k__Bacteria
OTU_187	1.7435e-05	0	0	1.7435e-05	0	0	0	0	0	0.00017435	0	0	0	0	0	0	0	0	0	0	0	0	0	0	0.000313829	0	0	0.000296394	0	0	0.00020922	0	0	0.000348699	0	0	k__Bacteria;p__Proteobacteria;c__Alphaproteobacteria;o__Caulobacterales;f__Hyphomonadaceae;g__UKL13-1;s__
OTU_188	0	0.000261525	8.71748e-05	0	0.00010461	0	0	0	0	0	1.7435e-05	0.000366134	0	0.000331264	6.97399e-05	0	0.000191785	5.23049e-05	0	0.000226655	0	0	5.23049e-05	8.71748e-05	0	6.97399e-05	0	0	0	0	0	0.000313829	0	0	0	0.000418439	k__Bacteria;p__Chloroflexi;c__Chloroflexia;o__Chloroflexales;f__Herpetosiphonaceae;g__Herpetosiphon;s__
OTU_189	0	6.97399e-05	0.00010461	3.48699e-05	6.97399e-05	6.97399e-05	0	0	0	0	0	0.00010461	0	0.000122045	0.000122045	0	0.00010461	0.00013948	0	1.7435e-05	5.23049e-05	0	0.000156915	0.000156915	0	6.97399e-05	3.48699e-05	0	0	0.00010461	0	0.000383569	0.00017435	3.48699e-05	0	5.23049e-05	k__Bacteria;p__unidentified_Bacteria;c__Alphaproteobacteria;o__Rhizobiales;f__;g__;s__
OTU_190	0.00017435	0	3.48699e-05	5.23049e-05	0	0	0.000122045	0	5.23049e-05	0.00013948	1.7435e-05	3.48699e-05	0	6.97399e-05	0.000976358	0	0	0.00010461	0	0	1.7435e-05	0	0.000226655	1.7435e-05	3.48699e-05	6.97399e-05	3.48699e-05	0.00020922	0	0	0.00017435	1.7435e-05	3.48699e-05	5.23049e-05	0	0	k__Bacteria;p__Proteobacteria;c__Alphaproteobacteria;o__Rhodobacterales;f__Rhodobacteraceae;g__Paracoccus
OTU_191	0	6.97399e-05	3.48699e-05	5.23049e-05	0	0.000156915	0	0	0	1.7435e-05	3.48699e-05	0.000313829	0	5.23049e-05	3.48699e-05	0	0.000226655	0	0	6.97399e-05	1.7435e-05	0	0.00013948	0	0.00010461	0	0.000331264	6.97399e-05	0	5.23049e-05	0.00013948	0.000313829	0.000122045	0.000401004	0.00010461	0.00017435	k__Bacteria;p__Proteobacteria;c__Gammaproteobacteria;o__Burkholderiales;f__Comamonadaceae
OTU_192	0.00010461	0	0	0.00013948	0	0	0	0	0	0.00017435	0	0	0	0	0	0	0	0	0	0	0	0	0	0	0.000435874	0	0	0.000383569	0	0	0.000627659	0	0	0.000348699	0	0	k__Bacteria;p__Proteobacteria;c__Gammaproteobacteria;o__Xanthomonadales;f__Rhodanobacteraceae;g__Dokdonella;s__
OTU_193	1.7435e-05	8.71748e-05	0.000122045	8.71748e-05	0.00013948	3.48699e-05	0	0	0	0.000122045	1.7435e-05	8.71748e-05	0	5.23049e-05	0.000122045	1.7435e-05	0.000435874	0.000784574	0	0.00010461	0.00010461	0	5.23049e-05	0.00024409	0.00017435	0	0.000156915	0.000226655	5.23049e-05	6.97399e-05	0.000331264	0.00116814	0.000191785	0.000122045	0.00010461	0.00020922	k__Bacteria;p__Proteobacteria;c__Alphaproteobacteria;o__Sphingomonadales;f__Sphingomonadaceae;g__Novosphingobium;s__
OTU_194	0	0	0	0	0	0	0.00931027	0	0	0	0	0	0	0	0	0	0	0	0	0	0	0	0	0	0	0	0	0	0	0	0	0	0	0	0	0	Unknown
OTU_195	0	0	0	0	0	0	0	0.00149941	6.97399e-05	0	0	0	6.97399e-05	0	0	0	0	0	5.23049e-05	0	0	6.97399e-05	0	0	0	0	0	0	0	0	0	0	0	0	0	0	k__Bacteria;p__Firmicutes;c__Clostridia;o__Monoglobales;f__Monoglobaceae;g__Monoglobus;s__
OTU_196	0	0.00010461	5.23049e-05	0	8.71748e-05	3.48699e-05	0	0	0	0	3.48699e-05	0.00010461	0	0.00024409	3.48699e-05	0	0.00020922	0.000261525	0	8.71748e-05	0.00010461	0	0.00010461	0.00024409	0	0.000226655	0.000191785	0	8.71748e-05	8.71748e-05	0	0.00165632	0.00010461	0	5.23049e-05	0.000122045	k__Bacteria;p__Myxococcota;c__Polyangia;o__Haliangiales;f__Haliangiaceae;g__Haliangium;s__
OTU_197	0	0	0	0	0	0	0	0	0	0	0.00210963	8.71748e-05	0	0.000122045	8.71748e-05	0	0	0	0	0	0.00010461	0	6.97399e-05	1.7435e-05	0	3.48699e-05	0.000122045	0	0	0	0	0	0	0	0.00010461	0	k__Bacteria;p__Firmicutes;c__Bacilli;o__Bacillales;f__Bacillaceae;g__Bacillus;s__Bacillus_coagulans
OTU_198	1.7435e-05	0	0	0	1.7435e-05	0	0	0	0	0	3.48699e-05	6.97399e-05	0	3.48699e-05	1.7435e-05	0	0	0.000261525	0	0	0.000767139	0	3.48699e-05	5.23049e-05	0	6.97399e-05	0.00010461	3.48699e-05	0	0	0	0	0	0	0	0	k__Bacteria;p__Actinobacteriota;c__Actinobacteria;o__Corynebacteriales;f__Corynebacteriaceae;g__Corynebacterium;s__Corynebacterium_tuberculostearicum
OTU_199	0	0	0	0	0	0	0	0.000505614	0.000889183	0	0	0	0	0	0	0	0	0	0	1.7435e-05	0	0	0	0	0	0	0	0	0	0	0	0	0	0	1.7435e-05	0	k__Bacteria;p__Firmicutes;c__Clostridia;o__Oscillospirales;f__Oscillospiraceae;g__NK4A214_group;s__
OTU_200	0	0	0	0	0	0	0	0	0	0	0	0.00010461	0.00010461	0	0	0	0.000802009	0.00142967	0	8.71748e-05	0.000156915	0	1.7435e-05	5.23049e-05	0	0	0	0	0	1.7435e-05	0	0.00010461	0	0	0	5.23049e-05	k__Bacteria;p__Proteobacteria;c__Gammaproteobacteria;o__Cellvibrionales;f__Cellvibrionaceae;g__Cellvibrio;s__
OTU_201	0	0	0	0	0	0	0	0.00113327	0.000627659	0	0	0	0	0	0	0	0	0	3.48699e-05	0	0	0	0	0	0	0	0	0	0	0	0	0	0	0	0	0	k__Bacteria;p__Bacteroidota;c__Bacteroidia;o__Bacteroidales;f__Muribaculaceae;g__;s__
OTU_202	0	0	0	0	0	0	0	0.00149941	0.0014471	0	0	0	6.97399e-05	0	0	6.97399e-05	0	0	0	1.7435e-05	0	3.48699e-05	0	0	0	0	0	0	0	0	0	0	0	0	0	0	k__Bacteria;p__Firmicutes;c__Clostridia;o__Oscillospirales;f__Oscillospiraceae;g__Colidextribacter;s__
OTU_203	0	0	0	0	0	0	0.00191785	0	0	0	0	0	0	0	0	0	0	0	0	0	0	0	0	0	0	0	0	0	0	0	0	0	0	0	0	0	k__Bacteria
OTU_204	0	0.000278959	0	0	0.00010461	1.7435e-05	0	0	0	0	0.000261525	0	1.7435e-05	0.000331264	0	0	1.7435e-05	0	0	0	0	0	0.00013948	5.23049e-05	0	0.000122045	0.00013948	0	0	0	0	0	0.00010461	0	0.000122045	0	k__Bacteria;p__unidentified_Bacteria;c__Gammaproteobacteria;o__Xanthomonadales;f__Rhodanobacteraceae;g__;s__
OTU_205	0.000156915	0	0	0.000122045	0	0	8.71748e-05	0	0	0.00013948	0	0	0	0	0	0	0	0	0	0	0	0	0	0	0.000976358	0	0	0	0	0	0	0	0	0	0	0	k__Bacteria
OTU_206	0	0	0	0	0	0	0	0.00125532	0.000540484	0	0	0	5.23049e-05	0	0	0	0	0	6.97399e-05	0	0	1.7435e-05	0	0	0	0	0	0	0	0	0	0	0	0	0	0	k__Bacteria;p__Actinobacteriota;c__Coriobacteriia;o__Coriobacteriales;f__Eggerthellaceae;g__Enterorhabdus;s__
OTU_207	0	3.48699e-05	0	0	3.48699e-05	0.000435874	0	0	0	0	0	1.7435e-05	0	0	0.000662529	0	6.97399e-05	5.23049e-05	0	0	3.48699e-05	3.48699e-05	0	3.48699e-05	0	0	0.00010461	0	3.48699e-05	5.23049e-05	0	0.00010461	0	0	0	0	k__Bacteria;p__Proteobacteria;c__Alphaproteobacteria;o__Rickettsiales;f__Mitochondria;g__unidentified_Mitochondria
OTU_208	0	0	0	0	0	0	1.7435e-05	0	0	0	0	0	0	0	0	0	0	0	0	0	0	0	0	0	5.23049e-05	0	0	0	0	0	0	0	0	0.0010461	0	0	k__Bacteria
OTU_209	0	0	0	0	0	0	0	0.00219681	0.000540484	0	0	0	1.7435e-05	0	0	0	6.97399e-05	0	3.48699e-05	6.97399e-05	0	0	0	0	0	0	0	0	0	0	0	0	0	0	0	0	k__Bacteria;p__Desulfobacterota;c__Desulfovibrionia;o__Desulfovibrionales;f__Desulfovibrionaceae;g__Desulfovibrio
OTU_210	0	0	0	0	0	0	0	0.000924053	0.000296394	0	0	0	0	0	0	0	0	0	0	0	0	0	0	0	0	0	0	0	0	0	0	0	0	0	0	0	k__Bacteria;p__unidentified_Bacteria;c__Clostridia;o__Oscillospirales;f__Oscillospiraceae;g__;s__
OTU_211	0	0	0	0	0	0	0.00010461	0	0	0	0	0	0	0	0	0	0	0	0	0	0	0	0	0	0	0	0	0	0	0	0	0	0	0.00120301	0	0	k__Bacteria
OTU_212	5.23049e-05	0	0	0	0	0	8.71748e-05	0	0	0	0	0	0	0	3.48699e-05	0	0.00017435	0	0	3.48699e-05	0	0	0	0	0	0	0	8.71748e-05	0	0	0.00010461	0.000540484	0	0	0	0	k__Bacteria;p__Proteobacteria;c__Alphaproteobacteria;o__Rickettsiales;f__Mitochondria
OTU_213	0	0	0	0	0	0	0	0.00170863	0.00271985	0	0	0	0.00010461	0	0	1.7435e-05	3.48699e-05	0	5.23049e-05	3.48699e-05	0	0	0	0	0	0	0	0	0	0	0	0	0	0	0	0	k__Bacteria;p__Firmicutes;c__Clostridia;o__Oscillospirales;f__Oscillospiraceae
OTU_214	0	0	0	0	0	1.7435e-05	0	0	0	0	5.23049e-05	0.00010461	0	0	0	0	0.000122045	0	0	3.48699e-05	0.000122045	0	5.23049e-05	0.000906618	0	6.97399e-05	6.97399e-05	0	0	0.00010461	0	0.000418439	0	0	3.48699e-05	5.23049e-05	k__Bacteria;p__Myxococcota;c__Polyangia;o__mle1-27;f__;g__;s__
OTU_215	3.48699e-05	0	0	0	0	0	0.000296394	0.000366134	0.000313829	0	0	0	0	0	0	0	0	0	0	0	0	0	0	0	0	0	0	5.23049e-05	0	0	0.000122045	0.000313829	0	0	0	0	k__Bacteria
OTU_216	0	0	0.00010461	0	1.7435e-05	0.000401004	0	0	0	0	8.71748e-05	0.00013948	0	0	6.97399e-05	0	3.48699e-05	0.000313829	0	0.00020922	1.7435e-05	0	5.23049e-05	0	0	6.97399e-05	0.000296394	0	0	0	0	8.71748e-05	0	0	0.00010461	0.00024409	k__Bacteria
OTU_217	0	0.00020922	0.000592789	0	0.000453309	0.000557919	0	0	0	0	0.000470744	0.000958923	3.48699e-05	0.000296394	0.000645094	0	0.000313829	0.000453309	0	0.000523049	0.00010461	0	0.00017435	0.00013948	0	0.000470744	0.000662529	0	0	5.23049e-05	0	0.000697399	5.23049e-05	0	0.000610224	0.000906618	k__Bacteria;p__Actinobacteriota;c__Actinobacteria;o__Streptomycetales;f__Streptomycetaceae
OTU_218	0	0	0	0	0	0	0	0.000767139	0.000732269	0	0	0	0	0	0	0	0	0	6.97399e-05	0	0	0	0	0	0	0	0	0	0	0	0	0	0	0	0	0	k__Bacteria;p__Firmicutes;c__Clostridia;o__Oscillospirales;f__[Eubacterium]_coprostanoligenes_group;g__;s__
OTU_219	0	0	0	0	0	0	0	0.000418439	0.00135993	0	0.00010461	0	0	0	0	6.97399e-05	0	0	1.7435e-05	0	0	0	0	0	0	0	0	0	0	0	0	0	0	0	8.71748e-05	0	k__Bacteria;p__Firmicutes;c__Clostridia;o__Oscillospirales;f__Oscillospiraceae;g__Intestinimonas;s__
OTU_220	0	0	0	3.48699e-05	0	0	0.00106353	0	1.7435e-05	8.71748e-05	0	0	0	0	0	0	0	0	0	0	0	0	0	0	0.000226655	0	0	3.48699e-05	0	0	0	0	0	0	3.48699e-05	0	k__Bacteria;p__Bacteroidota;c__Bacteroidia;o__Bacteroidales;f__Bacteroidaceae;g__Bacteroides;s__Bacteroides_thetaiotaomicron
OTU_221	0	0	0	0	0	0	0	0.00258038	0.00142967	0	0	0	3.48699e-05	0	0	1.7435e-05	0	0	0	0	0	0	0	0	0	0	0	0	0	0	0	0	0	0	0	0	k__Bacteria;p__unidentified_Bacteria;c__Saccharimonadia;o__Saccharimonadales;f__Saccharimonadaceae;g__Candidatus_Saccharimonas;s__
OTU_222	0	0.00010461	0.000191785	0	0.000435874	0.00020922	0	0	0	0	5.23049e-05	3.48699e-05	0	0.00013948	0.00020922	0	5.23049e-05	0	0	0	0	0	5.23049e-05	0	5.23049e-05	0.000278959	0.000366134	0	0	0	0	0	6.97399e-05	0	0	0	k__Bacteria;p__Proteobacteria;c__Gammaproteobacteria;o__Xanthomonadales;f__Rhodanobacteraceae;g__Ahniella;s__
OTU_223	1.7435e-05	0	0	8.71748e-05	0	0	0.00230142	0	0	0.000348699	0	0	0	0	0	0	0	0	0	6.97399e-05	0	0	0	0	0.0024409	0	0	0	0	0	0.00013948	0	0	0.000122045	0	0	k__Bacteria;p__Bacteroidota;c__Bacteroidia;o__Bacteroidales;f__Prevotellaceae;g__Prevotella;s__Prevotella_copri
OTU_224	0	0	0	0	0	0	0.00650324	0	0	0	0	0	0	0	0	0	0	0	0	0	0	0	0	0	0	0	0	0	0	0	0	0	0	0	0	0	Unknown
OTU_225	0	3.48699e-05	8.71748e-05	0	0	5.23049e-05	0	0	0	0	8.71748e-05	5.23049e-05	0	3.48699e-05	5.23049e-05	0	0.00013948	8.71748e-05	0	3.48699e-05	6.97399e-05	0	0	3.48699e-05	0	0	3.48699e-05	0	6.97399e-05	0	0	0.00137736	1.7435e-05	0	0	5.23049e-05	k__Bacteria;p__Proteobacteria;c__Gammaproteobacteria;o__Salinisphaerales;f__Solimonadaceae;g__Panacagrimonas;s__
OTU_226	1.7435e-05	0	0	1.7435e-05	0	0	0.0017435	0	0	0.000191785	0	0	0	0	0	0	0	0	0	0	0	0	0	0	0.000261525	0	0	6.97399e-05	0	0	0	0	0	0	0	0	k__Bacteria;p__Firmicutes;c__Bacilli;o__Erysipelotrichales;f__Erysipelatoclostridiaceae;g__Erysipelotrichaceae_UCG-003
OTU_227	0	0	0	0	0	0	0	0.00202246	0.00127275	0	0	0	5.23049e-05	0	0	0	0	0	5.23049e-05	0	0	0	0	0	0	0	0	0	0	0	0	0	0	0	0	0	k__Bacteria;p__Bacteroidota;c__Bacteroidia;o__Bacteroidales;f__Muribaculaceae;g__;s__
OTU_228	0	0.00010461	0.000122045	0	0.000156915	1.7435e-05	0	0	0	0	8.71748e-05	0.00010461	0	0.00010461	0.000331264	0	0.00013948	0.00013948	0	6.97399e-05	0.00010461	0	1.7435e-05	1.7435e-05	3.48699e-05	0.00013948	5.23049e-05	6.97399e-05	1.7435e-05	6.97399e-05	0.00010461	0.00010461	1.7435e-05	0	5.23049e-05	3.48699e-05	k__Bacteria;p__Proteobacteria;c__Gammaproteobacteria;o__Burkholderiales;f__Comamonadaceae;g__Rhizobacter
OTU_229	0	3.48699e-05	0.000540484	0	1.7435e-05	6.97399e-05	0	0	0	0	0	6.97399e-05	0	0	6.97399e-05	0	0	0.00010461	0	0	3.48699e-05	0	0	0	0	0	1.7435e-05	0	0.000261525	6.97399e-05	0	0	0	0	5.23049e-05	6.97399e-05	k__Bacteria;p__Proteobacteria;c__Gammaproteobacteria;o__Xanthomonadales;f__Xanthomonadaceae;g__Vulcaniibacterium;s__
OTU_230	0	0	0	0	0.00010461	0	0	0	0	0	0	0.00010461	0	0	3.48699e-05	0	8.71748e-05	0.000435874	0	0	0	0	0	0.000278959	0	0.000122045	5.23049e-05	0	0.00013948	0	0	1.7435e-05	0	0	0	0.000156915	k__Bacteria;p__Proteobacteria;c__Gammaproteobacteria;o__Burkholderiales;f__Comamonadaceae;g__Paucibacter
OTU_231	0.000453309	0.000679964	0.000331264	0.000819443	6.97399e-05	0.000156915	0.000819443	6.97399e-05	0	3.48699e-05	1.7435e-05	0.00010461	0	0.00116814	0.000383569	0	8.71748e-05	0.000401004	0	0.000296394	0	0	0.000191785	8.71748e-05	0	6.97399e-05	0.000296394	0.000226655	8.71748e-05	3.48699e-05	0.00167376	5.23049e-05	0.000122045	0.000854313	0	0.00017435	k__Bacteria;p__Proteobacteria;c__Gammaproteobacteria;o__Burkholderiales;f__Oxalobacteraceae
OTU_232	0.00020922	0	0	0	0	0	0	0	0	3.48699e-05	0	0	0	0	0	0	3.48699e-05	0	0	0	0	0	0	0	0.000435874	0	0	0	0	0	0.00020922	0.000313829	0	6.97399e-05	0	0	k__Bacteria
OTU_233	0	0	0	6.97399e-05	0	0	3.48699e-05	0.000592789	8.71748e-05	0	0	0	0	0	0	0	0	0	0	0	0	0	0	0	0	0	0	8.71748e-05	0	3.48699e-05	1.7435e-05	5.23049e-05	0	8.71748e-05	0	0	k__Bacteria
OTU_234	0	5.23049e-05	0.000366134	0	3.48699e-05	0	0	0	1.7435e-05	0	6.97399e-05	0.000122045	0	0	0.000261525	0	0.000156915	0.00017435	0	0.000156915	0.000261525	0	1.7435e-05	8.71748e-05	0	1.7435e-05	0	0	0	0.000261525	0	8.71748e-05	0	1.7435e-05	0	3.48699e-05	k__Bacteria;p__Proteobacteria;c__Alphaproteobacteria;o__Rhizobiales;f__Devosiaceae;g__Devosia;s__
OTU_235	0	5.23049e-05	0	0	0	1.7435e-05	0	0	0	0	0	1.7435e-05	0	3.48699e-05	0	0	5.23049e-05	0	0	1.7435e-05	0	0	0	0	0	0	3.48699e-05	0	0	3.48699e-05	0	0.00153428	0	0	0	5.23049e-05	k__Bacteria;p__Bacteroidota;c__Bacteroidia;o__Sphingobacteriales;f__env.OPS_17;g__;s__
OTU_236	0	3.48699e-05	0.000156915	0	0	0.000156915	0	0	0	0	0	0.00010461	0	1.7435e-05	8.71748e-05	0	0.000122045	0.000191785	0	0.000226655	0	0	0	0.00010461	0	8.71748e-05	8.71748e-05	0	0	6.97399e-05	0	0.00020922	0	0	3.48699e-05	0.000122045	k__Bacteria;p__Proteobacteria;c__Alphaproteobacteria;o__Caulobacterales;f__Caulobacteraceae;g__Phenylobacterium;s__
OTU_237	0	0.000156915	0.000366134	0	0	0.00020922	0	0	0	0	3.48699e-05	8.71748e-05	0	8.71748e-05	0.000313829	0	0.000313829	0	0	8.71748e-05	0.000191785	0	5.23049e-05	3.48699e-05	1.7435e-05	3.48699e-05	3.48699e-05	5.23049e-05	0	0.00017435	6.97399e-05	0.00116814	6.97399e-05	0.000156915	1.7435e-05	0	k__Bacteria;p__Proteobacteria;c__Alphaproteobacteria;o__Caulobacterales;f__Caulobacteraceae;g__Brevundimonas
OTU_238	0	0	1.7435e-05	0	0	0	0	0	0	0	0	3.48699e-05	0	0	5.23049e-05	0	5.23049e-05	0	0	0.000122045	0	0	0	0	0	0	0	0	0	1.7435e-05	0	0.000819443	0	0	0	3.48699e-05	k__Bacteria;p__unidentified_Bacteria;c__Alphaproteobacteria;o__Micavibrionales;f__;g__;s__
OTU_239	0	3.48699e-05	0	3.48699e-05	6.97399e-05	5.23049e-05	5.23049e-05	0	5.23049e-05	1.7435e-05	0.00010461	3.48699e-05	0	8.71748e-05	1.7435e-05	0	0.00020922	6.97399e-05	0	0	5.23049e-05	6.97399e-05	1.7435e-05	3.48699e-05	0.000348699	0.000523049	5.23049e-05	1.7435e-05	0	1.7435e-05	0	0	0	0.000313829	0	0	k__Bacteria;p__Firmicutes;c__Bacilli;o__Staphylococcales;f__Staphylococcaceae;g__Staphylococcus
OTU_240	0	0	0	0	0	0	0	0	0	0	0	0	0	0	0	0	0.000366134	0	0	0.000505614	0	0	0	0	8.71748e-05	0	0	0	0	0	0	0	0	0	0	0	Unknown
OTU_241	0	0	0	0	0	0	0	0.000854313	0.000679964	0	0	0	0	0	0	0	0	0	5.23049e-05	0	0	1.7435e-05	0	0	0	0	0	0	0	0	0	0	0	0	0	0	k__Bacteria;p__Firmicutes;c__Clostridia;o__Peptostreptococcales-Tissierellales;f__Anaerovoracaceae;g__[Eubacterium]_brachy_group;s__
OTU_242	0	0	0	0	0	0	0	0.000592789	0.000313829	0	0	0	0	0	0	0	0	0	0	0	0	6.97399e-05	0	0	0	0	0	0	0	0	0	0	0	0	0	0	k__Bacteria;p__Bacteroidota;c__Bacteroidia;o__Bacteroidales;f__Muribaculaceae;g__;s__
OTU_243	1.7435e-05	0	0	3.48699e-05	0	0	0.0010461	0	0	6.97399e-05	0	0	0	0	0	0	0	0	0	0	0	0	0	0	5.23049e-05	0	0	8.71748e-05	0	0	6.97399e-05	0	0	0.000122045	0	0	k__Bacteria;p__Actinobacteriota;c__Coriobacteriia;o__Coriobacteriales;f__Eggerthellaceae;g__Senegalimassilia;s__
OTU_244	0	0	0	0	0	0	0	0.000767139	0.000679964	0	0	0	0	0	0	3.48699e-05	0	0	5.23049e-05	0	0	5.23049e-05	0	0	0	0	0	0	0	0	0	0	0	0	0	0	k__Bacteria;p__Bacteroidota;c__Bacteroidia;o__Bacteroidales;f__Muribaculaceae;g__;s__
OTU_245	1.7435e-05	0	0	0.00013948	0	0	0.000156915	0.000714834	5.23049e-05	0	0	0	0	0	0	0	6.97399e-05	0	0	0.00013948	0	0	1.7435e-05	0	0.00010461	0	0	0.00017435	0	0	0.00013948	0.00013948	0	0.00017435	0	0	k__Bacteria
OTU_246	0	0.000645094	0	0	5.23049e-05	0	0	0	0	0	0	0	0	0.000383569	0	0	0	0	0	0	0	0	0	0	0	0.000156915	0	0	0	0	0	0	0	0	0	0	k__Bacteria;p__unidentified_Bacteria;c__Saccharimonadia;o__Saccharimonadales
OTU_247	0	0	6.97399e-05	0	3.48699e-05	3.48699e-05	0	0	0	0	8.71748e-05	0.000313829	0	6.97399e-05	0.00013948	0	0	6.97399e-05	0	5.23049e-05	1.7435e-05	0	0	6.97399e-05	0	5.23049e-05	8.71748e-05	0	0	0	0	5.23049e-05	0	0	8.71748e-05	0.000261525	k__Bacteria;p__Proteobacteria;c__Gammaproteobacteria;o__Burkholderiales;f__Burkholderiaceae;g__Burkholderia-Caballeronia-Paraburkholderia
OTU_248	3.48699e-05	0	0	0.000941488	0	0	0	0	0	0	0	0	0	0	0	0	0	0	0	0	0	0	0	0	0	0	0	0	0	0	0	0	0	0	0	0	Unknown
OTU_249	0.0472488	0.0422624	0.0417916	0.0400481	0.0362996	0.0354279	0.0103564	0.00312086	0.0035393	0.0099205	0.00788061	0.00920566	0.0213753	0.0220378	0.0205907	0.00162145	0.00549201	0.00697399	0.0239731	0.017156	0.0231885	0.0108969	0.0131634	0.0102343	0.0280354	0.0264837	0.0217937	0.0529326	0.0686066	0.0557222	0.0361253	0.0298487	0.033231	0.0290641	0.0274775	0.0291513	k__Bacteria;p__Proteobacteria;c__Gammaproteobacteria;o__Enterobacterales;f__Erwiniaceae
OTU_250	0	0	0	0	0	0	0	0.00158658	0.00169119	0	0	0	6.97399e-05	0	0	0	0	0	3.48699e-05	0	0	0	0	0	0	0	0	0	0	0	0	0	0	0	0	0	k__Bacteria
OTU_251	0	0	0	0	0	0	0	0.000924053	0.000383569	0	0	0	0	0	0	0	0	0	0	0	0	0	0	0	0	0	0	0	0	0	0	0	0	0	0	0	k__Bacteria;p__Bacteroidota;c__Bacteroidia;o__Bacteroidales;f__Muribaculaceae;g__;s__
OTU_252	3.48699e-05	0	0	0.000122045	0	0	0.000767139	1.7435e-05	6.97399e-05	0.00020922	0	0	0	0	0	0	0	0	0	0	0	0	0	0	0.000348699	0	0	8.71748e-05	0	0	6.97399e-05	0	0	0.00013948	0.000122045	0	k__Bacteria;p__Firmicutes;c__Clostridia;o__Lachnospirales;f__Lachnospiraceae;g__Tyzzerella;s__Anaerotignum_lactatifermentans
OTU_253	0	0	0	0.00013948	0	0	0	0.000645094	0.000941488	0	0	0	0	0	0	0	0	0	0	0	0	0	0	0	0	0	0	0	0	0	0	0	0	0	0	0	Unknown
OTU_254	0	0	3.48699e-05	8.71748e-05	0	0	3.48699e-05	0	0	5.23049e-05	0	0	0	0	0	0	0	0	0	0	0	0	0	0	0.00010461	0	0	1.7435e-05	0	0	1.7435e-05	0	0	0.000802009	0	0	k__Bacteria;p__Proteobacteria;c__Gammaproteobacteria;o__Burkholderiales;f__Neisseriaceae;g__Neisseria
OTU_255	0	0	0	0	0	0	0	0	0	3.48699e-05	0	0	0	3.48699e-05	3.48699e-05	0	8.71748e-05	3.48699e-05	0	1.7435e-05	3.48699e-05	0	0	8.71748e-05	0	1.7435e-05	0	1.7435e-05	0	0	8.71748e-05	0.000610224	0	0	1.7435e-05	5.23049e-05	k__Bacteria;p__Proteobacteria;c__Alphaproteobacteria;o__Rhizobiales;f__Hyphomicrobiaceae;g__Hyphomicrobium
OTU_256	1.7435e-05	0	0	0	0	0	0	0	0	1.7435e-05	0	0	0	0	0	0	0	0	0	0	0	0	0	0	0	0	0	0	0	0	1.7435e-05	0	0	0.00130762	0	0	k__Bacteria;p__Bacteroidota;c__Bacteroidia;o__Bacteroidales;f__Prevotellaceae;g__Alloprevotella;s__
OTU_257	0	0	0	0	0	0	0	6.97399e-05	0	0	0.000401004	0	0	1.7435e-05	0	0	0.00024409	0	5.23049e-05	5.23049e-05	0	0.000226655	1.7435e-05	0	0	0	0	0	0	0	0	0	0	0	0.000488179	0	k__Bacteria;p__Firmicutes;c__Bacilli;o__Lactobacillales;f__Lactobacillaceae;g__Lactobacillus;s__Lactobacillus_intestinalis
OTU_258	0	0	0	0	0	0	0.000366134	0	0	0.00017435	0	0	0	0	0	0	0	0	0	0	0	0	0	0	0.000540484	0	0	1.7435e-05	0	0	8.71748e-05	0	0	3.48699e-05	3.48699e-05	0	k__Bacteria;p__Firmicutes;c__Clostridia;o__Oscillospirales;f__[Eubacterium]_coprostanoligenes_group;g__;s__
OTU_259	0	0	0	0	0	0	0	0.000488179	0.000348699	0	0	0	0	0	0	0	0	0	3.48699e-05	0	0	0.00010461	0	0	0	0	0	0	0	0	0	0	0	0	0	0	k__Bacteria;p__Firmicutes;c__Clostridia;o__Oscillospirales;f__Ruminococcaceae;g__Ruminococcus
OTU_260	1.7435e-05	0	0	0	0	0	0.00301625	0	0	0.000313829	0	0	0	0	0	0	0	0	0	0	0	0	0	0	0.000453309	0	0	6.97399e-05	0	0	8.71748e-05	0	0	0.00010461	0	0	k__Bacteria;p__Bacteroidota;c__Bacteroidia;o__Bacteroidales;f__Bacteroidaceae;g__Bacteroides;s__Bacteroides_dorei
OTU_261	0	0	0	0	0	0	0	0.00134249	0.000627659	0	0	0	0	0	0	0	0	0	5.23049e-05	0	0	3.48699e-05	0	0	0	0	0	0	0	0	0	0	0	0	0	0	k__Bacteria;p__Bacteroidota;c__Bacteroidia;o__Bacteroidales;f__Muribaculaceae;g__;s__
OTU_262	0	8.71748e-05	5.23049e-05	0	0.00017435	0.00017435	0	0	0	0	0.000226655	0.000261525	3.48699e-05	3.48699e-05	0.00013948	0	5.23049e-05	0.000122045	0	0.000296394	1.7435e-05	0	0	6.97399e-05	0	0.00024409	0.00020922	0	5.23049e-05	1.7435e-05	0	0.000331264	0	0	1.7435e-05	0.000313829	k__Bacteria;p__unidentified_Bacteria;c__Alphaproteobacteria;o__Rhizobiales;f__Xanthobacteraceae;g__;s__
OTU_263	0.00216194	0	0	0.00242346	0	1.7435e-05	0.00233629	0	0	0.0017435	0	0	0	0	0	0	0	0.000156915	0	1.7435e-05	0	0	0	0	0.00125532	0	5.23049e-05	0.00277216	0	0	0.0031906	0	0	0.00149941	0	0	k__Bacteria;p__Proteobacteria;c__Gammaproteobacteria;o__Aeromonadales;f__Aeromonadaceae;g__Aeromonas
OTU_264	0.251953	0.261437	0.257898	0.210702	0.228119	0.236436	0.0423844	0.019562	0.0182195	0.0414778	0.0368575	0.0417044	0.0693737	0.0898075	0.0879245	0.00979845	0.0154474	0.0225608	0.0981414	0.0911151	0.120406	0.0535254	0.0692517	0.0450694	0.14131	0.156235	0.12881	0.236976	0.288496	0.239818	0.171229	0.118732	0.190233	0.156915	0.149487	0.154073	k__Bacteria;p__Proteobacteria;c__Gammaproteobacteria;o__Enterobacterales;f__Enterobacteriaceae
OTU_265	0	0	0	0	0	0	0	0	0	0	0	0	0	0	0	0	0	0	0	0	0	0	0	0	0	0	0	0	0	0	0	0	0.000645094	0	0	0	Unknown
OTU_266	0	3.48699e-05	0	0	1.7435e-05	3.48699e-05	0	0	0	0	1.7435e-05	0	0	0	0	0	0.00024409	0	0	5.23049e-05	0	0	0	3.48699e-05	0	1.7435e-05	5.23049e-05	0	3.48699e-05	0	0	0.000819443	0	0	0	1.7435e-05	k__Bacteria;p__unidentified_Bacteria;c__unidentified_Bacteria;o__Gemmatimonadales;f__Gemmatimonadaceae;g__;s__
OTU_267	0	3.48699e-05	1.7435e-05	0	0.00017435	0.00020922	0	0	0	0	0	5.23049e-05	0	5.23049e-05	0	0	0	1.7435e-05	0	0	0	0	0	0	0	0.000122045	0.000226655	0	0	0	0	0	0	0	1.7435e-05	0	k__Bacteria;p__Acidobacteriota;c__Acidobacteriae;o__Bryobacterales;f__Bryobacteraceae;g__Bryobacter;s__Bryobacter_aggregatus
OTU_268	0	0	6.97399e-05	0	0	0	0	0	0	0	0	5.23049e-05	0	0	5.23049e-05	0	8.71748e-05	5.23049e-05	0	6.97399e-05	5.23049e-05	0	3.48699e-05	1.7435e-05	0	0	0	0	0	0.00013948	0	0.000732269	1.7435e-05	0	0	0.00010461	k__Bacteria;p__Actinobacteriota;c__Actinobacteria;o__Propionibacteriales;f__Nocardioidaceae;g__Nocardioides
OTU_269	0	8.71748e-05	5.23049e-05	0	0.000122045	0.00013948	0	0	0	0	6.97399e-05	5.23049e-05	0	8.71748e-05	1.7435e-05	0	5.23049e-05	0.00010461	0	0	0	0	6.97399e-05	5.23049e-05	0	0.000122045	5.23049e-05	0	0	3.48699e-05	0	0	0.00010461	0	8.71748e-05	5.23049e-05	k__Bacteria;p__Chloroflexi;c__Anaerolineae;o__SBR1031;f__A4b;g__;s__
OTU_270	0	0	0	0.000627659	0	0	0	1.7435e-05	0.000278959	0	0	0	0	0	0	0	0	0	0	3.48699e-05	0	0	0	0	1.7435e-05	0	0	0	0	0	0	1.7435e-05	0	0	0	0	k__Bacteria;p__Proteobacteria
OTU_271	1.7435e-05	0	1.7435e-05	0	0	0	0	0	0	5.23049e-05	0	0	0	3.48699e-05	0.000156915	0	0	0	0	0	0	0	0	1.7435e-05	0	0	0	3.48699e-05	0	0	0	0	0	0.000697399	0	0	k__Bacteria;p__Bacteroidota;c__Bacteroidia;o__Flavobacteriales;f__Weeksellaceae;g__Chryseobacterium;s__
OTU_272	0	0	0	0	0	0	0	0.000383569	0.000767139	0	1.7435e-05	0	0	0	0	3.48699e-05	0	0	0	0	0	3.48699e-05	0	0	0	0	0	0	0	0	0	0	0	0	6.97399e-05	0	k__Bacteria;p__unidentified_Bacteria;c__Clostridia;o__Lachnospirales;f__Lachnospiraceae;g__unidentified_Lachnospiraceae;s__Clostridium_sp_Culture-54
OTU_273	0	0	0	0	0	0	0	0.000854313	0.00106353	0	0	0	0	0	0	0	0	0	0	0	0	3.48699e-05	0	0	0	0	0	0	0	0	0	0	1.7435e-05	0	0	0	k__Bacteria;p__Firmicutes;c__Clostridia;o__Clostridia_UCG-014;f__;g__;s__
OTU_274	0	5.23049e-05	0	0	0.000156915	0	0	0	0	0	3.48699e-05	0.00020922	0	0.00017435	1.7435e-05	0	0.000122045	8.71748e-05	0	0	3.48699e-05	0	0.00010461	0.00020922	0	8.71748e-05	0	0	0	0	0	5.23049e-05	0.00017435	0	1.7435e-05	0.00017435	k__Bacteria;p__Myxococcota;c__Polyangia;o__Blfdi19;f__;g__;s__
OTU_275	0	0	0	0	3.48699e-05	0.000156915	0	0	0	0	0	3.48699e-05	0	1.7435e-05	1.7435e-05	0	5.23049e-05	8.71748e-05	0	0	3.48699e-05	0	0	6.97399e-05	0	3.48699e-05	5.23049e-05	0	0	1.7435e-05	0	0.00010461	0	0	1.7435e-05	0.00010461	k__Bacteria
OTU_276	0	5.23049e-05	6.97399e-05	0	0.000191785	6.97399e-05	0	0	0	0	8.71748e-05	0.000191785	1.7435e-05	0.00010461	5.23049e-05	0	0.000383569	0.000366134	0	0.00010461	0.000278959	0	0	0.000278959	0	6.97399e-05	0.000191785	0	0.000122045	0.000470744	0	0.00106353	1.7435e-05	0	0.00010461	0.000191785	k__Bacteria;p__Proteobacteria;c__Gammaproteobacteria;o__Burkholderiales;f__Comamonadaceae;g__Ramlibacter;s__
OTU_277	0	0	5.23049e-05	0	0	0	0	0	0	0	0	0	0	0	1.7435e-05	0	0.000122045	0	0	3.48699e-05	0	0	0	0	0	0	0	0	0	0	0	0.00111584	0	0	0	0	k__Bacteria;p__Verrucomicrobiota;c__Verrucomicrobiae;o__Chthoniobacterales;f__Chthoniobacteraceae;g__Chthoniobacter;s__
OTU_278	0	0	0	0	0	0	0	0.00102866	0.000523049	0	6.97399e-05	0	0	0	0	5.23049e-05	8.71748e-05	0	0	0.000278959	0	0	0	0	0	0	0	0	0	0	0	0	0	0	0.00010461	0	k__Bacteria;p__Bacteroidota;c__Bacteroidia;o__Bacteroidales;f__Muribaculaceae;g__;s__
OTU_279	0	0	6.97399e-05	0	0	0	0	0	0	0	0	0	0	0	0.00013948	0	6.97399e-05	0	0	5.23049e-05	0	0	0	0	0	0	0	0	0	0	0	0.000523049	5.23049e-05	0	3.48699e-05	0	k__Bacteria;p__Proteobacteria;c__Alphaproteobacteria;o__Rhizobiales;f__Kaistiaceae;g__Kaistia;s__
OTU_280	0	0	0	0	0	0	0	0.000540484	0.00020922	0	0	0	1.7435e-05	0	0	6.97399e-05	0	0	0	0	0	0	0	0	0	0	0	0	0	0	0	0	0	0	0	0	k__Bacteria;p__Campilobacterota;c__Campylobacteria;o__Campylobacterales;f__Helicobacteraceae;g__Helicobacter
OTU_281	0	0.000470744	0	0	0	0	0	0	0	0	8.71748e-05	0	0	0.000401004	3.48699e-05	0	0	0	0	0	3.48699e-05	0	6.97399e-05	0	0	0	3.48699e-05	0	0	0	0	0.000802009	5.23049e-05	0	8.71748e-05	0	k__Bacteria;p__Gemmatimonadetes;c__unidentified_Gemmatimonadetes;o__Gemmatimonadales;f__Gemmatimonadaceae;g__Gemmatimonas;s__
OTU_282	0	0	0	0	0	0	0	0.000714834	0.000191785	0	0	0	0	0	0	0	0	0	0	0	0	0	0	0	0	0	0	0	0	0	0	0	0	0	0	0	k__Bacteria;p__Bacteroidota;c__Bacteroidia;o__Bacteroidales;f__Muribaculaceae;g__;s__
OTU_283	0	0.00010461	3.48699e-05	0	0.000505614	3.48699e-05	5.23049e-05	0	0	0	0	0	0	0	0	0	0	0	0	0	0	0	0	0	0	8.71748e-05	0	0	0	0.00010461	0	0	1.7435e-05	0	3.48699e-05	8.71748e-05	k__Bacteria;p__Firmicutes;c__Bacilli;o__Lactobacillales;f__Aerococcaceae;g__Abiotrophia;s__
OTU_284	0	0	8.71748e-05	0	0	5.23049e-05	0	0	0	0	3.48699e-05	1.7435e-05	0	0	6.97399e-05	0	0.000122045	0.000122045	0	3.48699e-05	1.7435e-05	0	8.71748e-05	0	0	0	1.7435e-05	0	0	0	0	0.000523049	1.7435e-05	0	1.7435e-05	0	k__Bacteria;p__Gemmatimonadetes;c__unidentified_Gemmatimonadetes;o__Gemmatimonadales;f__Gemmatimonadaceae;g__Gemmatimonas;s__
OTU_285	0	0	0	0	0	0	0	0.000575354	0.00010461	0	5.23049e-05	0	0	0	0	0	0	0	0	1.7435e-05	0	1.7435e-05	0	0	0	0	0	0	0	0	0	0	0	0	0	0	k__Bacteria;p__Firmicutes;c__Clostridia;o__Oscillospirales;f__UCG-010;g__;s__
OTU_286	0.00020922	0	0	0.000418439	0	0	0.00017435	0	0	0.000226655	0	0	0	0	0	0	0	3.48699e-05	0	0	0	0	0	0	0.000645094	0	0	0.000331264	0	0	0.000383569	0	0	0.000226655	0	0	k__Bacteria;p__Proteobacteria;c__Gammaproteobacteria;o__Burkholderiales;f__Comamonadaceae;g__Simplicispira;s__
OTU_287	0	8.71748e-05	0.000313829	0	1.7435e-05	0.00010461	3.48699e-05	0	0	5.23049e-05	0.00024409	0.000313829	1.7435e-05	5.23049e-05	0.000366134	0	0.000366134	0.000278959	0	0.000156915	0.000226655	0	5.23049e-05	0.000191785	5.23049e-05	8.71748e-05	3.48699e-05	0	1.7435e-05	0.00017435	3.48699e-05	0.000366134	5.23049e-05	0.000122045	0.000418439	0.00020922	k__Bacteria;p__Actinobacteriota;c__Actinobacteria;o__Micrococcales;f__Microbacteriaceae
OTU_288	0	0	0	0	0	0	0	0.000767139	0.000296394	0	0	0	0	0	0	0	0	0	0	0	0	0	0	0	0	0	0	0	0	0	0	0	0	0	0	0	k__Bacteria;p__Bacteroidota;c__Bacteroidia;o__Bacteroidales;f__Tannerellaceae;g__Parabacteroides
OTU_289	0	0	0.000348699	0	0	0	0	0	0	0	1.7435e-05	0	0	0	0.00020922	0	0.00017435	0	0	0	0.00017435	0	0	5.23049e-05	0	0	0	0	0	8.71748e-05	0	0.00013948	0	0	1.7435e-05	0	k__Bacteria;p__Proteobacteria;c__Gammaproteobacteria;o__Xanthomonadales;f__Xanthomonadaceae;g__Pseudoxanthomonas;s__
OTU_290	0	8.71748e-05	0.000156915	0	0.000156915	0.000156915	0	0	0	0	1.7435e-05	0.000488179	0	0.00010461	0.000313829	0	0	1.7435e-05	0	0.000331264	0	0	0	3.48699e-05	0	0.000191785	0.000122045	0	0	1.7435e-05	0	0.00024409	0	0	0.000278959	0.000348699	k__Bacteria;p__Acidobacteriota;c__Acidobacteriae;o__Acidobacteriales;f__Acidobacteriaceae_(Subgroup_1);g__Occallatibacter;s__
OTU_291	1.7435e-05	0	0	0	0	0	0	0.000470744	0.000453309	0	3.48699e-05	0	0	0	0	1.7435e-05	0	0	5.23049e-05	0	0	3.48699e-05	0	0	0	0	0	0	0	0	0	0	0	0	0	0	k__Bacteria;p__Firmicutes;c__Clostridia;o__Peptostreptococcales-Tissierellales;f__Anaerovoracaceae;g__[Eubacterium]_nodatum_group;s__
OTU_292	0	0	0	0	0	0	0	0	0	0	5.23049e-05	1.7435e-05	0	0	5.23049e-05	0	0	0.000366134	0	0	0	0	1.7435e-05	3.48699e-05	0	0.00010461	3.48699e-05	0	0	1.7435e-05	0	0	0	0	0	0	k__Bacteria;p__Actinobacteriota;c__Actinobacteria;o__Corynebacteriales;f__Corynebacteriaceae;g__Lawsonella
OTU_293	0	0	0	0	0	0	0	0.000819443	0.000662529	0	0	0	0	0	0	6.97399e-05	0	0	0.000331264	0	0	3.48699e-05	0	0	0	0	0	0	0	0	0	0	0	0	0	0	k__Bacteria;p__Firmicutes;c__Bacilli;o__Erysipelotrichales;f__Erysipelotrichaceae;g__Allobaculum;s__
OTU_294	0	6.97399e-05	0.000435874	0	0.000261525	0.000261525	0	0	0	0	0.00024409	0.000540484	1.7435e-05	0.00010461	0.000226655	0	0.000470744	0.000662529	0	0.000348699	0.00017435	0	3.48699e-05	0.000261525	0.00010461	0.000278959	0.000453309	0	0.00013948	0.000191785	0	0.000924053	0	0	0.000278959	0.000331264	k__Bacteria;p__unidentified_Bacteria;c__Alphaproteobacteria;o__Micropepsales;f__Micropepsaceae;g__;s__
OTU_295	0	5.23049e-05	0	0	1.7435e-05	5.23049e-05	0	0	0	0	1.7435e-05	0	0	1.7435e-05	0	0	3.48699e-05	0	0	0.000575354	0	0	5.23049e-05	0	0	0	0	0	0	8.71748e-05	0	1.7435e-05	5.23049e-05	0	0	0	k__Bacteria;p__unidentified_Bacteria;c__Bacteroidia;o__Chitinophagales;f__Chitinophagaceae;g__unidentified_Chitinophagaceae;s__Panacibacter_ginsenosidivorans
OTU_296	0	6.97399e-05	0.00013948	0	5.23049e-05	0.000122045	0	0	0	0	3.48699e-05	0.00010461	0	1.7435e-05	6.97399e-05	0	8.71748e-05	0.000122045	0	5.23049e-05	0.00013948	0	0	0	0	1.7435e-05	5.23049e-05	0	3.48699e-05	6.97399e-05	0	0.00013948	0	0	6.97399e-05	6.97399e-05	k__Bacteria;p__Acidobacteriota;c__Acidobacteriae;o__Bryobacterales;f__Bryobacteraceae;g__Bryobacter;s__
OTU_297	3.48699e-05	0	0	0	0	0	0.000836878	0	0	0	0	0	0	0	0	0	0	0	0	0	0	0	0	0	0.000871748	0	0	0	0	0	6.97399e-05	0	0	5.23049e-05	0	0	k__Bacteria;p__Bacteroidota;c__Bacteroidia;o__Bacteroidales;f__Bacteroidaceae;g__Bacteroides;s__Bacteroides_ovatus
OTU_298	0	0	0	0	1.7435e-05	3.48699e-05	0	0	0	0	0.00017435	1.7435e-05	0	0	0	0	0	0.000401004	0	0	1.7435e-05	0	0	1.7435e-05	0	1.7435e-05	1.7435e-05	0	0.00013948	3.48699e-05	0	5.23049e-05	0	0	0.00013948	0	k__Bacteria;p__Proteobacteria;c__Gammaproteobacteria;o__Burkholderiales;f__TRA3-20
OTU_299	0	3.48699e-05	0.000366134	0	0	0	0	0	0	0	1.7435e-05	0.00020922	1.7435e-05	0	0.000505614	0	0.000226655	0.000122045	0	3.48699e-05	8.71748e-05	0	5.23049e-05	0.000122045	0	0	3.48699e-05	0	0	0.00017435	0	5.23049e-05	3.48699e-05	0	1.7435e-05	0.00017435	k__Bacteria;p__Proteobacteria;c__Alphaproteobacteria;o__Rhizobiales;f__Devosiaceae;g__Devosia
OTU_300	0	0	0	0	0	0	0	0	0	0	0	0	0	0	0	0	0	0	0	0	0	0	0	0	0	0	0	0	0.000749704	0	0	0	0	0	0	0	k__Bacteria;p__Proteobacteria;c__Gammaproteobacteria;o__Burkholderiales;f__Comamonadaceae;g__Schlegelella;s__
OTU_301	0	0	0	0	0	0	0	0.000383569	0.000435874	0	0	0	0	0	0	0	0	0	0	0	0	0	0	0	0	0	0	0	0	0	0	0	0	0	0	0	k__Bacteria;p__Firmicutes;c__Clostridia;o__Lachnospirales;f__Lachnospiraceae;g__Lachnospiraceae_NK4A136_group;s__
OTU_302	0	0	0	0	0	0	0	0.000278959	0.000313829	0	0	0	8.71748e-05	0	0	0	0	0	1.7435e-05	0	0	1.7435e-05	0	0	0	0	0	0	0	0	0	0	0	0	0	0	k__Bacteria;p__Proteobacteria;c__Gammaproteobacteria;o__Burkholderiales;f__Sutterellaceae;g__Parasutterella;s__
OTU_303	0	1.7435e-05	8.71748e-05	0	0	3.48699e-05	0	0	0	0	0.00020922	0.000156915	0	6.97399e-05	8.71748e-05	0	1.7435e-05	1.7435e-05	0	0	6.97399e-05	0	8.71748e-05	0.000122045	0	5.23049e-05	8.71748e-05	0	0	8.71748e-05	0	3.48699e-05	0.00010461	0	0.000122045	0.000122045	k__Bacteria;p__Chloroflexi;c__Anaerolineae;o__SBR1031;f__A4b;g__;s__
OTU_304	0	3.48699e-05	6.97399e-05	5.23049e-05	3.48699e-05	0.000156915	3.48699e-05	0	0	3.48699e-05	6.97399e-05	5.23049e-05	3.48699e-05	0.00010461	3.48699e-05	0	0.000383569	0.00020922	0	0.00010461	0.00010461	0	3.48699e-05	6.97399e-05	1.7435e-05	0	0.000156915	5.23049e-05	5.23049e-05	6.97399e-05	6.97399e-05	0.00013948	3.48699e-05	0	8.71748e-05	1.7435e-05	k__Bacteria;p__Proteobacteria;c__Alphaproteobacteria;o__Caulobacterales;f__Caulobacteraceae
OTU_305	0	0	0	0	0	0	0	0	0	0	0	0	0	0	0	0	0	0	0	0	0.000889183	0	0	0	0	1.7435e-05	0	0	0	0	0	0	0	0	0	0	k__Bacteria
OTU_306	0	0	0	3.48699e-05	0	0	0	0	0	0	0	0	0	0	0	0	8.71748e-05	0	0	3.48699e-05	0	0	0	0	0	0	0	0	0	0	0	0.00170863	0	0	0	0	Unknown
OTU_307	0	0	0	0	0	0	0	0	0	0	0.000331264	0	0	0	0	0	0	0	0	0	0	0	0	0	0	0	0	0	0	0	0	0	0	0	0.000278959	0	k__Bacteria;p__Firmicutes;c__Clostridia;o__Lachnospirales;f__Lachnospiraceae;g__Lachnospiraceae_NK4A136_group;s__
OTU_308	0	0	0	0	0	0	0	0.000627659	0.0010984	0	0	0	0	0	0	0	0	0	1.7435e-05	0	0	0	0	0	0	0	0	0	0	0	0	0	0	0	0	0	k__Bacteria
OTU_309	0	0	0	0	0	0	0.00210963	0	0	0	0	0	0	0	0	0	0	0	0	0	0	0	0	0	0	0	0	0	0	0	0	0	0	0	0	0	Unknown
OTU_310	0	0	0	0	0	3.48699e-05	0	0	0	0	0	0	0	0	0	0	0.000296394	0.000191785	0	0	0	0	0	0	0	5.23049e-05	5.23049e-05	0	6.97399e-05	0	0	0	0	0	0	0	k__Bacteria;p__Kapabacteria;c__unidentified_Kapabacteria;o__Kapabacteriales;f__unidentified_Kapabacteriales;g__unidentified_Kapabacteriales;s__Candidatus_Kapabacteria_sp_59-99
OTU_311	0	0	0	5.23049e-05	0	0	0.000749704	0	0	0.00010461	0	0	0	0	0	0	0	0	0	0	0	0	0	0	8.71748e-05	0	0	5.23049e-05	0	0	5.23049e-05	0	0	0	0	0	k__Bacteria
OTU_312	0	0	0.000296394	0	0	0	0	0	0	0	0	1.7435e-05	0	0	0.000401004	0	0	0	0	0	0	0	0	0	0	0	3.48699e-05	0	0	0	0	0	3.48699e-05	0	0	3.48699e-05	k__Bacteria;p__unidentified_Bacteria;c__Gammaproteobacteria;o__Xanthomonadales;f__Rhodanobacteraceae;g__;s__
OTU_313	0	3.48699e-05	3.48699e-05	0	0	0.00017435	0	0	0	0	0.000122045	8.71748e-05	0.00010461	6.97399e-05	1.7435e-05	0	0.00010461	0.000191785	0	6.97399e-05	0	0	5.23049e-05	3.48699e-05	0	8.71748e-05	0.000278959	0	5.23049e-05	0	0	0.00013948	5.23049e-05	0	5.23049e-05	3.48699e-05	k__Bacteria;p__Proteobacteria;c__Alphaproteobacteria;o__Reyranellales;f__Reyranellaceae;g__Reyranella;s__
OTU_314	0	0	0.000156915	0	5.23049e-05	1.7435e-05	0	0	0	0	3.48699e-05	0.000418439	0	1.7435e-05	0.00013948	0	0.00010461	1.7435e-05	0	0.000122045	0.00013948	0	0	0.00010461	0	0	8.71748e-05	0	0	6.97399e-05	0	0.00017435	0	0	6.97399e-05	0.000156915	k__Bacteria;p__Actinobacteriota;c__Acidimicrobiia;o__IMCC26256;f__;g__;s__
OTU_315	0	5.23049e-05	0.00017435	0	8.71748e-05	3.48699e-05	0	0	0	0	1.7435e-05	5.23049e-05	0	0.000122045	0.00013948	0	8.71748e-05	1.7435e-05	0	1.7435e-05	6.97399e-05	0	6.97399e-05	5.23049e-05	0	0.00010461	6.97399e-05	0	0	5.23049e-05	0	5.23049e-05	0.000122045	0	0	0	k__Bacteria;p__Proteobacteria;c__Gammaproteobacteria;o__Oceanospirillales;f__Pseudohongiellaceae;g__BIyi10;s__
OTU_316	0	0	0	0.00111584	0	0	0	0	0	3.48699e-05	0	0	0	0	0	0	0	0	0	0	0	0	0	0	0	0	0	0	0	0	0	0	0	0	0	0	k__Bacteria;p__Firmicutes;c__Thermoanaerobacteria;o__Thermoanaerobacterales;f__SRB2
OTU_317	0.00013948	0	0	1.7435e-05	0	0	5.23049e-05	0.00017435	8.71748e-05	6.97399e-05	0	0	0	0	0	0	3.48699e-05	0	0	6.97399e-05	0	0	1.7435e-05	0	0.000261525	0	0	0.000122045	0	0	0	5.23049e-05	0	0.000122045	0	0	k__Bacteria;p__Proteobacteria;c__Gammaproteobacteria;o__Enterobacterales;f__Enterobacteriaceae
OTU_318	0	0	5.23049e-05	0	6.97399e-05	0	0	0	0	0	0.00013948	8.71748e-05	0	0	1.7435e-05	0	0	0	0	0	0	0	0	0	0	8.71748e-05	8.71748e-05	0	0	1.7435e-05	0	0	0	0	6.97399e-05	8.71748e-05	k__Bacteria;p__Actinobacteriota;c__Actinobacteria;o__Frankiales
OTU_319	0	0	0	0	0	0	0	0.0010984	0	0	0	0	0	0	0	0	0	0	0	0	0	0	0	0	0	0	0	0	0	0	0	0	0	0	0	0	k__Bacteria
OTU_320	0	3.48699e-05	1.7435e-05	0	0	0.00024409	0	0	0	1.7435e-05	0	0	1.7435e-05	0	0	0	6.97399e-05	0	0	1.7435e-05	0	0	5.23049e-05	0	0	0	0.000348699	0	0	0	3.48699e-05	3.48699e-05	3.48699e-05	0	0	1.7435e-05	k__Bacteria;p__Proteobacteria;c__Gammaproteobacteria;o__Burkholderiales;f__Nitrosomonadaceae;g__Ellin6067;s__
OTU_321	0	0	0	0	0	0	0	0.000278959	0.000278959	0	0	0	0	0	0	0	1.7435e-05	0	0	3.48699e-05	0	0	0	0	0	0	0	0	0	0	0	0	0	0	0	0	k__Bacteria;p__unidentified_Bacteria;c__Clostridia;o__Oscillospirales;f__Ruminococcaceae;g__;s__
OTU_322	0	8.71748e-05	0	0	0	0	0	0	0	0	0	5.23049e-05	0	0.00013948	0	0	0	0	0	5.23049e-05	0.000261525	0	0	6.97399e-05	0	0	0	0	0	0.00024409	0	0	0	0	0	3.48699e-05	k__Bacteria;p__Proteobacteria;c__Gammaproteobacteria;o__Enterobacterales
OTU_323	0	0	5.23049e-05	0	6.97399e-05	0.00010461	0	0	0	0	0.00010461	0.00010461	0	5.23049e-05	3.48699e-05	0	3.48699e-05	0.00013948	0	5.23049e-05	0.00010461	0	0	0.00024409	0	5.23049e-05	8.71748e-05	0	1.7435e-05	8.71748e-05	3.48699e-05	6.97399e-05	0	0	6.97399e-05	0.00013948	k__Bacteria;p__unidentified_Bacteria;c__Alphaproteobacteria;o__Acetobacterales;f__Acetobacteraceae;g__;s__
OTU_324	0	0.000418439	0	0	3.48699e-05	0	0	0	0	0	0	0	0	0.000331264	0	0	0	0	0	0	0	0	0	0	0	1.7435e-05	0	0	0	0	0	0	6.97399e-05	0	0	0	k__Bacteria;p__unidentified_Bacteria;c__Saccharimonadia;o__Saccharimonadales;f__;g__;s__
OTU_325	1.7435e-05	0	0	0	0	0	0.00013948	5.23049e-05	5.23049e-05	3.48699e-05	0	0	0	0	0	0	0	0	0	0	0	0	0	0	0.00024409	0	0	0	0	0	1.7435e-05	0.00013948	0	0	0	0	k__Bacteria
OTU_326	0	0	0.00010461	0	0	0	0	0	0	0	0	1.7435e-05	0	0	0.00013948	0	0.00010461	6.97399e-05	0	0	6.97399e-05	0	0	0	0	0	0	0	0	1.7435e-05	0	0.000557919	0	0	0	0	k__Bacteria;p__Actinobacteriota;c__Actinobacteria;o__Micrococcales;f__Microbacteriaceae;g__Agromyces
OTU_327	0	0	0	0	0	0.00013948	0	0	0	0	0.000226655	0	0	0	0	0	0	0	0	0	0	0	0	0	0	0	0.00020922	0	1.7435e-05	0	0	0	0	0	0.000348699	0	k__Bacteria;p__Proteobacteria;c__Gammaproteobacteria;o__Burkholderiales;f__TRA3-20;g__;s__
OTU_328	0	0	0	0	0	0	0	0.000348699	0.00020922	0	0	0	5.23049e-05	0	0	0	0	0	0	0	0	0	0	0	0	0	0	0	0	0	0	0	0	0	0	0	k__Bacteria;p__unidentified_Bacteria;c__Clostridia;o__Christensenellales;f__Christensenellaceae;g__;s__
OTU_329	0	0	0	0	0	0	0	0.00017435	0.000278959	0	0	0	0	0	0	0	0	0	0	0	0	0	0	0	0	0	0	0	0	0	0	0	0	0	0	0	k__Bacteria;p__Firmicutes;c__Clostridia;o__Oscillospirales;f__Butyricicoccaceae;g__Butyricicoccus;s__
OTU_330	0	0	0	0	0	0	0	1.7435e-05	0	0	0.000278959	0	0	0	0	0	0	0	1.7435e-05	3.48699e-05	0	0	0	0	0	0	0	0	0	0	0	0	0	0	0.000313829	0	k__Bacteria;p__Campilobacterota;c__Campylobacteria;o__Campylobacterales;f__Helicobacteraceae;g__Helicobacter
OTU_331	0	0	0	0	0	0	0	0	0	0	0	0	0.000557919	0	0	0	0	0	0	0	0	0	0	0	0	0	0	0	0	0	0	0	0	0	0	0	k__Bacteria;p__Proteobacteria;c__Gammaproteobacteria;o__Alteromonadales;f__Idiomarinaceae;g__Idiomarina
OTU_332	0	0	0	0	0	0	0	0.00308599	0.00197015	0	0	0	3.48699e-05	0	0	0.000191785	0	0	0	5.23049e-05	0	0	0	0	0	0	0	0	0	0	0	0	0	0	0	0	k__Bacteria;p__Firmicutes;c__Clostridia;o__Lachnospirales;f__Lachnospiraceae;g__Lachnospiraceae_NK4A136_group;s__
OTU_333	0	0	0	0	6.97399e-05	0	0	0	0	0	0	0	0	0	0	0	0	0.00010461	0	0	3.48699e-05	0	0	1.7435e-05	0	3.48699e-05	0	0	0	0	0	0.000366134	0	0	0	0	k__Bacteria;p__Gemmatimonadetes;c__unidentified_Gemmatimonadetes;o__Gemmatimonadales;f__Gemmatimonadaceae;g__Gemmatimonas;s__
OTU_334	0	0	0	0	0	0	0	0	0	0	0.00020922	0	0	0	0	0	6.97399e-05	0	0	0.000401004	0	0	0	0	0	0	0	0	0	0	0	0	0	0	0.00024409	0	k__Bacteria;p__Bacteroidota;c__Bacteroidia;o__Bacteroidales;f__Muribaculaceae;g__;s__
OTU_335	0	0	0.00020922	0	0	6.97399e-05	0	0	0	0	1.7435e-05	0	0	0	0.000191785	0	1.7435e-05	0	0	0	0	0	0	0	0	3.48699e-05	6.97399e-05	0	0	0	0	0	3.48699e-05	0	0.00010461	6.97399e-05	k__Bacteria;p__Armatimonadota;c__Fimbriimonadia;o__Fimbriimonadales;f__Fimbriimonadaceae;g__;s__
OTU_336	0	0	0	0	0	0	0	0.000836878	0.000383569	0	0	0	0	0	0	3.48699e-05	0	0	0	0	0	8.71748e-05	0	0	0	0	0	0	0	0	0	0	0	0	1.7435e-05	0	k__Bacteria;p__Firmicutes;c__Clostridia;o__Clostridia_UCG-014;f__;g__;s__
OTU_337	0	0	0	0	0	0	0	0.000313829	0.000226655	0	0	0	0	0	0	0	0	0	1.7435e-05	0	0	0	0	0	0	0	0	0	0	0	0	0	0	0	0	0	k__Bacteria;p__unidentified_Bacteria;c__Coriobacteriia;o__Coriobacteriales;f__;g__;s__
OTU_338	0	6.97399e-05	0	0	8.71748e-05	8.71748e-05	0	0	0	0	3.48699e-05	3.48699e-05	0	0.00017435	8.71748e-05	0.00017435	8.71748e-05	0	0	0.000122045	5.23049e-05	0	0	0.000156915	0	1.7435e-05	6.97399e-05	0	1.7435e-05	6.97399e-05	0	0.000993793	3.48699e-05	0	3.48699e-05	3.48699e-05	k__Bacteria;p__unidentified_Bacteria;c__unidentified_Bacteria;o__Frankiales
OTU_339	0	3.48699e-05	0	0	0	0	0	0	0	0	0	0	0	0	1.7435e-05	0	0.00020922	0	0	1.7435e-05	3.48699e-05	0	0	0	0	0	0	0	0	3.48699e-05	0	0.000592789	0	0	0	0	k__Bacteria;p__unidentified_Bacteria;c__Bacteroidia;o__Cytophagales;f__Microscillaceae;g__;s__
OTU_340	0	0	0	0	0	0	0	0	0	0	0	0	0	0	0	0	0.00020922	0	0	0.000191785	0	0	0	0	0	0	0	0	0	0	0	0.000401004	0	0	0	0	k__Bacteria
OTU_341	0	5.23049e-05	0.000505614	0	6.97399e-05	3.48699e-05	0	0	0	0	0	0	0	0	0.00010461	0	0	0	0	0	0	0	0	0	0	0	0	0	5.23049e-05	0	0	0	5.23049e-05	0	6.97399e-05	0	k__Bacteria;p__Proteobacteria;c__Gammaproteobacteria;o__Salinisphaerales;f__Salinisphaeraceae;g__Salinisphaera
OTU_342	0	0	0	0	0	0	3.48699e-05	0	0	0	0	0	0	0	0	0	0	0	0	0	0	0	0	0	0	0	0	0	0	0	0.000575354	0	0	0	0	0	k__Bacteria
OTU_343	0	0	1.7435e-05	0	0	0	0	0	0	0	0	0.00010461	0	0	1.7435e-05	0	8.71748e-05	1.7435e-05	0	5.23049e-05	0	0	0	0.000122045	0	5.23049e-05	0	0	0	5.23049e-05	0	0.00101123	0	0	5.23049e-05	0	k__Bacteria;p__Actinobacteriota;c__Actinobacteria;o__Propionibacteriales;f__Nocardioidaceae;g__Nocardioides
OTU_344	0	0	0	0	0	0	0	0.000993793	0.000401004	0	0	0	0	0	0	0	0	0	0	0	0	0	0	0	0	0	0	0	0	0	0	0	0	0	0	0	k__Bacteria;p__Bacteroidota;c__Bacteroidia;o__Bacteroidales;f__Muribaculaceae;g__;s__
OTU_345	0	0	0	0	0	0	0	0.00125532	0.00101123	0	0	0	0	0	0	0	0	0	0	0	0	0	0	0	0	0	0	0	0	0	0	0	0	0	0	0	k__Bacteria
OTU_346	0	0	0	0	0	0	0	0	0	0	5.23049e-05	6.97399e-05	0	0	1.7435e-05	0	0	3.48699e-05	0	0	0.000470744	0	1.7435e-05	1.7435e-05	0	5.23049e-05	3.48699e-05	0	0	6.97399e-05	0	0	0	0	0	0	k__Bacteria;p__Proteobacteria;c__Gammaproteobacteria;o__Alteromonadales;f__Alteromonadaceae;g__Alteromonas;s__Alteromonas_mediterranea
OTU_347	0	0	0	0	0	0	0	0.000627659	0.000383569	0	0	0	0	0	0	0	0	0	0	0	0	0	0	0	0	0	0	0	0	0	0	0	0	0	0	0	k__Bacteria;p__Bacteroidota;c__Bacteroidia;o__Bacteroidales;f__Muribaculaceae;g__;s__
OTU_348	0	0	0	0	0	0	0	0.00172606	8.71748e-05	0	0	0	0	0	0	1.7435e-05	0	0	5.23049e-05	0	0	0	0	0	0	0	0	0	0	0	0	0	0	0	0	0	k__Bacteria;p__unidentified_Bacteria;c__Bacilli;o__Erysipelotrichales;f__Erysipelotrichaceae;g__;s__
OTU_349	0	0	1.7435e-05	0	3.48699e-05	3.48699e-05	0	0	0	0	6.97399e-05	8.71748e-05	0	5.23049e-05	5.23049e-05	0	0	5.23049e-05	0	0.000226655	0	0	0	0	0	0	8.71748e-05	0	0	0	0	3.48699e-05	0	0	5.23049e-05	5.23049e-05	k__Bacteria;p__Bacteroidota;c__Bacteroidia;o__Chitinophagales;f__Chitinophagaceae;g__Arachidicoccus;s__Arachidicoccus_sp_KIS59-12
OTU_350	0	0	0	0	0	0	0	0.000453309	0.00020922	0	0	0	0	0	0	0	0	0	0	0	0	0	0	0	0	0	0	0	0	0	0	0	0	0	0	0	k__Bacteria;p__Actinobacteriota;c__Coriobacteriia;o__Coriobacteriales;f__Eggerthellaceae;g__Enterorhabdus;s__
OTU_351	0	0	0	0	0	0	0.000557919	0	0	5.23049e-05	0	0	0	0	0	0	0	0	0	0	0	0	0	0	0.00017435	0	0	0	0	0	1.7435e-05	0	0	0	0	0	k__Bacteria;p__Bacteroidota;c__Bacteroidia;o__Bacteroidales;f__Tannerellaceae;g__Parabacteroides;s__Parabacteroides_merdae
OTU_352	0	0	0	0	0	0	0	0.000976358	0.000488179	0	0	0	0	0	0	1.7435e-05	0	0	0	0	0	0	0	0	0	0	0	0	0	0	0	0	0	0	5.23049e-05	0	k__Bacteria;p__Bacteroidota;c__Bacteroidia;o__Bacteroidales;f__Muribaculaceae;g__;s__
OTU_353	0	0	0	0	0	0	0	0.000924053	0.000156915	0	0	0	0	0	0	0	0	0	0	0	0	0	0	0	0	0	0	0	0	0	0	0	0	0	0	0	k__Bacteria;p__Firmicutes;c__Clostridia;o__Clostridia_UCG-014;f__;g__;s__
OTU_354	0	0	0	0	0	0	0	0	0	0	0	0	0	0	0	0	0	0	0	0	0	0	0	0	0	0	0	0	0	0	0.00013948	0.000645094	0	0	0	0	k__Bacteria
OTU_355	0	0	0	0	0	0	0	0.00129019	0.000540484	0	0	0	0	0	0	5.23049e-05	0	0	0.000226655	0	0	0	0	0	0	0	0	0	0	0	0	0	0	0	0	0	k__Bacteria;p__Firmicutes;c__Clostridia;o__Lachnospirales;f__Lachnospiraceae
OTU_356	0	0	0	0	0	0	0	0.000854313	0.000662529	0	0	0	0	0	0	0	0	0	0	0	0	0	0	0	0	0	0	0	0	0	0	0	0	0	0	0	k__Bacteria;p__Firmicutes;c__Clostridia;o__Lachnospirales;f__Lachnospiraceae
OTU_357	0	0	0	0	0	0	0	0.000418439	0.00020922	0	0	0	0	0	0	0	0	0	0	0	0	0.000122045	0	0	0	0	0	0	0	0	0	0	0	0	0	0	k__Bacteria;p__Firmicutes;c__Clostridia;o__Oscillospirales;f__Ruminococcaceae;g__Ruminococcus
OTU_358	0	0	0	0	0	0	0	0.000313829	1.7435e-05	0	0	0	0	0	0	0	0	0	0	0	0	0	0	0	0	0	0	0	0	0	0	0	0	0	0	0	k__Bacteria;p__Bacteroidota;c__Bacteroidia;o__Bacteroidales;f__Bacteroidaceae;g__Bacteroides
OTU_359	0	0	0	0	0	0	0	0.000505614	0.000156915	0	0.00017435	0	0	0	0	0	3.48699e-05	0	0	0	0	1.7435e-05	0	0	0	0	0	0	0	0	0	0	0	0	0.00013948	0	k__Bacteria;p__Bacteroidota;c__Bacteroidia;o__Bacteroidales;f__Muribaculaceae;g__;s__
OTU_360	0	1.7435e-05	8.71748e-05	0	1.7435e-05	0	0	0	0	0	1.7435e-05	3.48699e-05	0	8.71748e-05	6.97399e-05	0	0	0	0	3.48699e-05	0	0	0	3.48699e-05	0	0	0	0	0	0.00010461	0	0	0	0	3.48699e-05	5.23049e-05	k__Bacteria;p__Actinobacteriota;c__Actinobacteria;o__Corynebacteriales;f__Nocardiaceae;g__Rhodococcus;s__Rhodococcus_fascians
OTU_361	0	1.7435e-05	8.71748e-05	0	3.48699e-05	8.71748e-05	0	0	0	0	1.7435e-05	8.71748e-05	0	6.97399e-05	0	0	0	1.7435e-05	0	5.23049e-05	0	0	0	0	0	6.97399e-05	1.7435e-05	0	0	0	0	5.23049e-05	0	0	6.97399e-05	0.000191785	k__Bacteria;p__WPS-2;c__;o__;f__;g__;s__
OTU_362	0	0	0	0	0	5.23049e-05	0	0	0	0	0.000488179	0	0	0	1.7435e-05	0	0	3.48699e-05	0	0	0	0	0	0	0	5.23049e-05	6.97399e-05	0	0	0	0	0	0	0	0.000313829	0	k__Bacteria;p__unidentified_Bacteria;c__unidentified_Bacteria;o__Gemmatimonadales;f__Gemmatimonadaceae;g__;s__
OTU_363	0	0	8.71748e-05	8.71748e-05	0	0	0.00010461	0	0	3.48699e-05	0	0	0	0	0	0	0	0	0	0	0	0	0	0	0	0	0	0	0	0	0	0	0	0.000278959	0	0	k__Bacteria
OTU_364	0	3.48699e-05	6.97399e-05	0	1.7435e-05	0	0	0	0	0	0	0.000331264	0	1.7435e-05	8.71748e-05	0	8.71748e-05	0.000278959	0	3.48699e-05	0.000191785	0	5.23049e-05	6.97399e-05	0	5.23049e-05	0	0	0	0.000191785	0	0.000156915	3.48699e-05	0	1.7435e-05	0.000296394	k__Bacteria;p__Proteobacteria;c__Alphaproteobacteria;o__Caulobacterales;f__Caulobacteraceae;g__Asticcacaulis;s__
OTU_365	0	0	0	0	0	0	0	8.71748e-05	0	0	0	0	0	0	0	0	1.7435e-05	0	0	0.000191785	0	0	0	0	8.71748e-05	0	0	0	0	0	0	0.000348699	0	0	0	0	k__Bacteria
OTU_366	0	0	0.00010461	0	0	1.7435e-05	0	0	0	0	0	3.48699e-05	0	1.7435e-05	0.000156915	0	1.7435e-05	0	0	0.000226655	0	0	0	0	0	1.7435e-05	0	0	0	0	0	1.7435e-05	0	0	5.23049e-05	3.48699e-05	k__Bacteria;p__Myxococcota;c__Polyangia;o__Haliangiales;f__Haliangiaceae;g__Haliangium;s__
OTU_367	0	0	0	0	0	0	0	0.000732269	0.000261525	0	0	0	0	0	0	0	0	0	0	0	0	0	0	0	0	0	0	0	0	0	0	0	0	0	0	0	k__Bacteria;p__Firmicutes;c__Clostridia;o__Lachnospirales;f__Lachnospiraceae;g__Lachnospiraceae_NK4A136_group;s__
OTU_368	0	1.7435e-05	1.7435e-05	0	1.7435e-05	0	0	0	0	0	6.97399e-05	0.00010461	0	0	1.7435e-05	0	0	0.000296394	0	8.71748e-05	0	0	0	0.00020922	0	0	0	0	1.7435e-05	1.7435e-05	0	1.7435e-05	0	0	0	5.23049e-05	k__Bacteria
OTU_369	0	0	0.000261525	0	0	0	0	0	0	0	0	0	0	0	0.000191785	0	8.71748e-05	3.48699e-05	0	0	1.7435e-05	0	1.7435e-05	0	0	0	0	1.7435e-05	0	5.23049e-05	0	0	0	3.48699e-05	0	1.7435e-05	k__Bacteria;p__Actinobacteriota;c__Actinobacteria;o__Corynebacteriales;f__Nocardiaceae;g__Rhodococcus;s__Rhodococcus_erythropolis
OTU_370	0	0	0	0	0	0	0	0	0	0	0	0	0	0	0	0	6.97399e-05	0	0	0	0	0	0	0	0	0	0	0	0	0	0	0.000993793	0	0	0	0	k__Bacteria;p__Bacteroidota;c__Bacteroidia;o__Sphingobacteriales;f__env.OPS_17;g__;s__
OTU_371	1.7435e-05	1.7435e-05	0	0	5.23049e-05	0.00010461	0	3.48699e-05	0	3.48699e-05	0	1.7435e-05	0	3.48699e-05	0	0	6.97399e-05	3.48699e-05	0	6.97399e-05	5.23049e-05	0	1.7435e-05	0.00010461	0.000191785	0.00010461	8.71748e-05	0	1.7435e-05	3.48699e-05	3.48699e-05	0	1.7435e-05	1.7435e-05	0	5.23049e-05	k__Bacteria;p__Proteobacteria;c__Alphaproteobacteria;o__Sphingomonadales;f__Sphingomonadaceae;g__Sphingomonas;s__
OTU_372	1.7435e-05	0	0	3.48699e-05	0	0	0.0013948	0	0	0.00010461	0	0	0	0	0	0	0	0	0	0	0	0	0	0	0.00024409	0	0	5.23049e-05	0	0	6.97399e-05	0	0	5.23049e-05	0	0	k__Bacteria;p__Bacteroidota;c__Bacteroidia;o__Bacteroidales;f__Bacteroidaceae;g__Bacteroides;s__Bacteroides_massiliensis
OTU_373	0	0	0	0	0	0	0	0	0	0	0	0	0.000627659	0	0	0	0	0	0	0	0	0	0	0	0	0	0	0	0	0	0	0	0	0	0	0	k__Bacteria;p__Proteobacteria;c__Gammaproteobacteria;o__Aeromonadales;f__Aeromonadaceae;g__Zobellella;s__Zobellella_denitrificans
OTU_374	0	0	3.48699e-05	0	5.23049e-05	5.23049e-05	0	0	0	0	0.00010461	0.000122045	0	0	5.23049e-05	0	8.71748e-05	0.00010461	0	0	0	0	5.23049e-05	6.97399e-05	0	0.00010461	3.48699e-05	0	6.97399e-05	1.7435e-05	0	8.71748e-05	0	0	0.00024409	3.48699e-05	k__Bacteria;p__unidentified_Bacteria;c__Alphaproteobacteria;o__Defluviicoccales;f__;g__;s__
OTU_375	0	0	3.48699e-05	0	0	0	0	0	0	0	3.48699e-05	5.23049e-05	0	0	8.71748e-05	0	6.97399e-05	0	0	0.00010461	3.48699e-05	0	0	0	0	0	0	0	0	1.7435e-05	0	0.000749704	0	0	0	0	k__Bacteria;p__Proteobacteria;c__Gammaproteobacteria;o__Burkholderiales;f__Methylophilaceae;g__Methylotenera;s__
OTU_376	0	0	0	8.71748e-05	1.7435e-05	1.7435e-05	1.7435e-05	0	0	5.23049e-05	0	0	0	3.48699e-05	0	0	5.23049e-05	0	0	3.48699e-05	0	0	0	0	5.23049e-05	0	0	8.71748e-05	0	0	0.00017435	1.7435e-05	1.7435e-05	0.000854313	0	6.97399e-05	k__Bacteria;p__Proteobacteria;c__Alphaproteobacteria;o__Rhodobacterales;f__Rhodobacteraceae
OTU_377	0	0	0	0	0	0	0	0.000313829	0.000470744	0	0	0	0	0	0	0	3.48699e-05	0	5.23049e-05	3.48699e-05	0	1.7435e-05	0	0	0	0	0	0	0	0	0	0	0	0	0	0	k__Bacteria;p__Firmicutes;c__Clostridia;o__Oscillospirales;f__Oscillospiraceae;g__Oscillibacter;s__
OTU_378	5.23049e-05	0	0	0.000366134	0	0	1.7435e-05	0	0	3.48699e-05	0	0	0	0	0	0	0	0	0	0	0	0	0	0	0	0	0	0	0	0	1.7435e-05	0	0	5.23049e-05	0	0	k__Bacteria;p__Proteobacteria;c__Gammaproteobacteria;o__Burkholderiales;f__Alcaligenaceae;g__Oligella
OTU_379	0	0	0	0	0	0	0	0.000540484	0.000191785	0	0	0	0	0	0	0	6.97399e-05	0	0	1.7435e-05	0	0	0	0	0	0	0	0	0	0	0	0	0	0	0	0	k__Bacteria;p__Bacteroidota;c__Bacteroidia;o__Bacteroidales;f__Prevotellaceae;g__Alloprevotella;s__
OTU_380	0	0	0	1.7435e-05	0	0	0.000662529	0	0	3.48699e-05	0	0	0	0	0	0	0	0	0	0	0	0	0	0	0.00017435	0	0	0	0	0	0	0	0	0	0	0	k__Bacteria;p__Firmicutes;c__Bacilli;o__Erysipelotrichales;f__Erysipelotrichaceae;g__Faecalitalea;s__Absiella_dolichum
OTU_381	0	0	0	0	0	0	0	0.000156915	6.97399e-05	0	0.000313829	0	0	0	0	0	0	0	1.7435e-05	0	0	3.48699e-05	0	0	0	0	0	0	0	0	0	0	0	0	0.00024409	0	k__Bacteria;p__Firmicutes;c__Clostridia;o__Oscillospirales;f__Ruminococcaceae;g__Ruminococcus
OTU_382	0	0	0	1.7435e-05	5.23049e-05	0	0	0	0	0	3.48699e-05	5.23049e-05	0	0	0	0	8.71748e-05	0.000453309	0	0	0	0	0	0.00017435	0	0	0	0	0	0	0	0.000435874	0	0	5.23049e-05	6.97399e-05	k__Bacteria;p__Proteobacteria;c__Gammaproteobacteria;o__Burkholderiales;f__Methylophilaceae;g__Methylotenera;s__
OTU_383	0	0	0	0	0	0	0	0	0	0	0	0	0	0	0	0	3.48699e-05	0	0	3.48699e-05	0	0	0	0	0	0	0	0	0	0	0	0.000435874	0	0	0	0	k__Bacteria;p__Armatimonadota;c__Armatimonadia;o__Armatimonadales;f__;g__;s__
OTU_384	0	0	0	0	0	6.97399e-05	0	0	0	0	0.000226655	0	0	1.7435e-05	0	0	0	0	0	0	0	0	0	1.7435e-05	0	0	1.7435e-05	0	0	0	0	0	1.7435e-05	0	0.00024409	0	k__Bacteria;p__Gemmatimonadetes;c__unidentified_Gemmatimonadetes;o__Gemmatimonadales;f__Gemmatimonadaceae;g__Gemmatimonas;s__
OTU_385	0	0	0	0	0	0	0	0.000226655	0.000261525	0	0	0	0	0	0	0	0	0	0	0	0	6.97399e-05	0	0	0	0	0	0	0	0	0	0	0	0	0	0	k__Bacteria;p__Firmicutes;c__Clostridia;o__Lachnospirales;f__Lachnospiraceae
OTU_386	8.71748e-05	0.000122045	1.7435e-05	0	5.23049e-05	5.23049e-05	3.48699e-05	0	0	0	0	1.7435e-05	0	0.000296394	0	8.71748e-05	1.7435e-05	0	0	0	0.00013948	0	3.48699e-05	3.48699e-05	0	0.00010461	1.7435e-05	5.23049e-05	0	5.23049e-05	1.7435e-05	0	0	0	0	0	k__Bacteria;p__Actinobacteriota;c__Actinobacteria;o__Propionibacteriales;f__Nocardioidaceae;g__Nocardioides
OTU_387	6.97399e-05	0	0	0.00013948	0	0	8.71748e-05	0	0	0	0	0	0	0	0	0	0	0	0	0	0	0	0	0	0	0	0	3.48699e-05	0	0	0	0	0	3.48699e-05	0	0	k__Bacteria
OTU_388	0	1.7435e-05	0	0	8.71748e-05	0.00013948	0	0	0	0	0	5.23049e-05	0	3.48699e-05	5.23049e-05	0	0	0	0	0	0	0	0	0	0	0	0.00013948	0	0	0	0	0	3.48699e-05	0	6.97399e-05	5.23049e-05	k__Bacteria;p__Acidobacteriota;c__Acidobacteriae;o__Bryobacterales;f__Bryobacteraceae;g__Bryobacter;s__Acidobacteria_bacterium_IGE-015
OTU_389	0	0	0	0	0	0	0	0.000296394	0.000575354	0	0	0	0	0	0	0	0	0	0	0	0	0	0	0	0	0	0	0	0	0	0	0	0	0	0	0	k__Bacteria;p__Firmicutes;c__Clostridia;o__Lachnospirales;f__Lachnospiraceae;g__[Eubacterium]_xylanophilum_group;s__
OTU_390	0	0	0	0	0	0	0	0	0	0	0	0	0	0	1.7435e-05	0	0.00017435	1.7435e-05	0	0.00013948	0	0	0	1.7435e-05	0	0	0	0	0	0	0	0.000714834	0	0	0	0	k__Bacteria;p__Bacteroidota;c__Bacteroidia;o__Cytophagales;f__Spirosomaceae;g__Dyadobacter;s__
OTU_391	0	0	0	0	0	0	0	0.00184811	0.00341725	0	3.48699e-05	0	0.000261525	0	0	3.48699e-05	0	0	0.00017435	3.48699e-05	0	3.48699e-05	0	0	0	0	0	0	0	0	0	0	0	0	6.97399e-05	0	k__Bacteria;p__Firmicutes;c__Clostridia;o__Lachnospirales;f__Lachnospiraceae;g__Lachnospiraceae_NK4A136_group;s__Clostridiales_bacterium_CIEAF_020
OTU_392	0	5.23049e-05	0.000156915	0	5.23049e-05	0.000226655	0	0	0	0	0.000156915	0.000122045	0	6.97399e-05	1.7435e-05	0	0	3.48699e-05	0	6.97399e-05	0	0	1.7435e-05	0	0	8.71748e-05	0.00013948	0	0	0	0	6.97399e-05	0	0	8.71748e-05	0.000122045	k__Bacteria;p__Actinobacteriota;c__Actinobacteria;o__Catenulisporales;f__Actinospicaceae;g__Actinospica
OTU_393	0	5.23049e-05	0.00024409	0	0	3.48699e-05	0	0	0	0	0	3.48699e-05	0	5.23049e-05	0.000331264	0	0	0	0	0	0	0	3.48699e-05	3.48699e-05	0	1.7435e-05	3.48699e-05	0	0	0	0	0	0	0	0	0.00010461	k__Bacteria;p__Myxococcota;c__Polyangia;o__Haliangiales;f__Haliangiaceae;g__Haliangium;s__
OTU_394	0	0	0	0	0	0	0	0.000453309	0.000366134	0	0	0	0	0	0	0	0	0	1.7435e-05	0	0	1.7435e-05	0	0	0	0	0	0	0	0	0	0	0	0	0	0	k__Bacteria;p__unidentified_Bacteria;c__Clostridia;o__Peptococcales;f__Peptococcaceae;g__;s__
OTU_395	0	0	5.23049e-05	0	6.97399e-05	0.00017435	0	0	0	3.48699e-05	0	5.23049e-05	0	1.7435e-05	3.48699e-05	0	5.23049e-05	0.000226655	0	8.71748e-05	0	0	0	0	1.7435e-05	0.00010461	8.71748e-05	0	0	1.7435e-05	0	5.23049e-05	0	0	0	3.48699e-05	k__Bacteria;p__Acidobacteriota;c__Acidobacteriae;o__unidentified_Acidobacteriae;f__unidentified_Acidobacteriae;g__Paludibaculum;s__
OTU_396	0	5.23049e-05	1.7435e-05	0	1.7435e-05	6.97399e-05	0	0	0	0	0.00010461	0.000122045	0	1.7435e-05	0	0	0	0.00010461	0	5.23049e-05	3.48699e-05	0	0	0.000278959	0	0	0.00013948	0	0	0	0	5.23049e-05	0	0	3.48699e-05	5.23049e-05	k__Bacteria;p__Proteobacteria;c__Gammaproteobacteria;o__Burkholderiales
OTU_397	0	0	0	0	0	0	0	0	0	0	0	0	0	0	0	0	5.23049e-05	0	0	1.7435e-05	0	0	0	0	0	0	0	0	0	0	0	0.000749704	0	0	0	0	k__Bacteria
OTU_398	0	0	0	0	0	0	0	0.000470744	0.000976358	0	0	0	0	0	0	3.48699e-05	0	0	0	0	0	0	0	0	0	0	0	0	0	0	0	0	0	0	0	0	k__Bacteria;p__unidentified_Bacteria;c__Clostridia;o__Lachnospirales;f__Lachnospiraceae;g__unidentified_Lachnospiraceae;s__Clostridium_sp_Clone-49
OTU_399	0	0	0	0	0	0	0	0	0	0	0	0	0.0010984	0	0	0	0	0	0	0	0	0	0	0	0	0	0	0	0	0	0	0	0	0	0	0	k__Bacteria;p__Proteobacteria;c__Gammaproteobacteria;o__Oceanospirillales;f__Halomonadaceae;g__Halomonas;s__Halomonas_alkaliphila
OTU_400	0	0	1.7435e-05	0	0	0.00017435	0	0	0	0	0.000296394	0	0.00010461	0	3.48699e-05	0	3.48699e-05	1.7435e-05	0	0	0	0	0	0	0	5.23049e-05	0.000191785	0	0	0	0	3.48699e-05	0	0	0.000278959	0	k__Bacteria;p__Proteobacteria;c__Gammaproteobacteria;o__Burkholderiales;f__Nitrosomonadaceae;g__IS-44;s__
OTU_401	0	0	0	0	0	0	0	0.00020922	0.00024409	0	0	0	0	0	0	0	0	0	0	0	0	0	0	0	0	0	0	0	0	0	0	0	0	0	0	0	k__Bacteria;p__Bacteroidota;c__Bacteroidia;o__Bacteroidales;f__Marinifilaceae;g__Odoribacter;s__
OTU_402	0	1.7435e-05	0	0	0	0.00020922	0	0	0	0	1.7435e-05	0	0	6.97399e-05	1.7435e-05	0	3.48699e-05	0	0	0	0	0	5.23049e-05	3.48699e-05	1.7435e-05	0	0.000348699	0	0	0	0	0	1.7435e-05	0	0	0	k__Bacteria;p__Proteobacteria;c__Gammaproteobacteria;o__Burkholderiales;f__Nitrosomonadaceae;g__Ellin6067;s__
OTU_403	0	0	0	0	0	0	0	0	0	0	0	0	0	0	0	0	0	0	0	1.7435e-05	5.23049e-05	0	0	3.48699e-05	0	1.7435e-05	0	0	0	1.7435e-05	0	0.000313829	0	0	0	0	k__Bacteria;p__Armatimonadota;c__Fimbriimonadia;o__Fimbriimonadales;f__Fimbriimonadaceae
OTU_404	0	3.48699e-05	0	5.23049e-05	0	0	3.48699e-05	0	0	3.48699e-05	0	0	0	5.23049e-05	0	0	0	0	0	0	8.71748e-05	0	0	0	0	0	0	0.000662529	0.00024409	0.000191785	0	0	0	0	5.23049e-05	0	k__Bacteria;p__Proteobacteria;c__Gammaproteobacteria;o__Enterobacterales;f__Morganellaceae;g__Proteus;s__Proteus_mirabilis
OTU_405	5.23049e-05	0	0	0	0	0	5.23049e-05	0	0	3.48699e-05	0	0	0	0	0	0	0	0	0	0	0	0	0	0	3.48699e-05	0	0	0	0	0	0.000122045	0	0	0.000348699	0	0	k__Bacteria;p__Proteobacteria;c__Gammaproteobacteria;o__Xanthomonadales;f__Xanthomonadaceae;g__Arenimonas
OTU_406	0	3.48699e-05	8.71748e-05	0	0.00024409	5.23049e-05	0	0	0	0	0.00020922	0.000226655	0	8.71748e-05	0.000156915	0	0	5.23049e-05	0	0.000226655	0	0	0	5.23049e-05	0	0.00020922	0.00024409	0	0	0	0	6.97399e-05	0	0	0.000156915	0.000348699	k__Bacteria;p__Acidobacteriota;c__Acidobacteriae;o__Acidobacteriales;f__Acidobacteriaceae_(Subgroup_1)
OTU_407	0	0	0	0.000679964	0	0	3.48699e-05	0	0	0	0	0	0	0	0	0	0	0	0	0	0	0	0	0	3.48699e-05	0	0	0	0	0	0	0	0	0	0	0	k__Bacteria;p__Firmicutes;c__Clostridia;o__Peptostreptococcales-Tissierellales;f__unidentified_Peptostreptococcales-Tissierellales;g__Guggenheimella;s__
OTU_408	0	0	0	0	0	0	0	0	0	0	0	0	0	0	0	0	3.48699e-05	0	0	3.48699e-05	0	0	0	0	0	0	0	0	0	0	0	0.000749704	0	0	0	0	k__Bacteria;p__Bacteroidota;c__Bacteroidia;o__Cytophagales;f__Microscillaceae;g__Ohtaekwangia
OTU_409	0	0	0	0	0	0	0	0	0	0	0	5.23049e-05	0	0	0	0	0	0	0	0	0	0	0	0	0	0	0	0	0	0	0	0.000540484	0	0	1.7435e-05	0	k__Bacteria;p__Bacteroidota;c__Bacteroidia;o__Chitinophagales;f__Chitinophagaceae;g__Parafilimonas;s__
OTU_410	0	0	0	0	0	0	0	0.000557919	0.000191785	0	0	0	1.7435e-05	0	0	3.48699e-05	5.23049e-05	0	3.48699e-05	0.00010461	0	0	0	0	0	0	0	0	0	0	0	0	0	0	5.23049e-05	0	k__Bacteria;p__Bacteroidota;c__Bacteroidia;o__Bacteroidales;f__Muribaculaceae;g__;s__
OTU_411	0	0	0	0	0	8.71748e-05	0	0	0	0	5.23049e-05	6.97399e-05	0	1.7435e-05	0	0	3.48699e-05	1.7435e-05	0	0.000191785	0	0	0	0.00010461	0	0	8.71748e-05	0	0	0	0	0	0	0	0	0	k__Bacteria;p__unidentified_Bacteria;c__unidentified_Bacteria;o__Gemmatimonadales;f__Gemmatimonadaceae;g__unidentified_Gemmatimonadaceae;s__Gemmatimonadetes_bacterium_WY71
OTU_412	0	0	0	0	0	0	0	0.00020922	0.00020922	0	0	0	0	0	0	0	0	0	0	0	0	5.23049e-05	0	0	0	0	0	0	0	0	0	0	0	0	0	0	k__Bacteria;p__unidentified_Bacteria;c__Clostridia;o__Lachnospirales;f__Lachnospiraceae;g__;s__
OTU_413	0	0	0	0	0	0	0	0	0	0	0	0	0	0	0	0	0	0	0	0	0	0	0	6.97399e-05	0	3.48699e-05	0	0	0	0	0	0.000435874	0	0	0	0	k__Bacteria;p__unidentified_Bacteria;c__Saccharimonadia;o__Saccharimonadales;f__LWQ8;g__;s__
OTU_414	0	0	0	0	0	0	0	0.000453309	6.97399e-05	0	0	0	0	0	0	0	0	0	0	0	0	0	0	0	0	0	0	0	0	0	0	0	0	0	0	0	k__Bacteria;p__Firmicutes;c__Clostridia;o__Clostridia_UCG-014;f__;g__;s__
OTU_415	0	0.00010461	0	0	0	0	0	0	0	0	1.7435e-05	0.000122045	0	0	0	0	0.000122045	1.7435e-05	0	0.00010461	0	0	1.7435e-05	3.48699e-05	0	5.23049e-05	3.48699e-05	0	0	0	0	0	0	0	0.000122045	0.00017435	k__Bacteria;p__Gemmatimonadetes;c__unidentified_Gemmatimonadetes;o__Gemmatimonadales;f__Gemmatimonadaceae;g__Gemmatimonas;s__
OTU_416	0	0.00010461	0	0	0.000122045	0.00017435	0	0	0	0	1.7435e-05	3.48699e-05	0	5.23049e-05	0	0	0.00024409	5.23049e-05	0	0.000418439	0	0	3.48699e-05	0	0	6.97399e-05	8.71748e-05	0	0	0	0	1.7435e-05	0	0	0	5.23049e-05	k__Bacteria;p__Bacteroidota;c__Bacteroidia;o__Cytophagales;f__Microscillaceae;g__Ohtaekwangia;s__
OTU_417	0	0.00020922	0.000435874	0	6.97399e-05	0.000313829	0	0	0	0	0.000156915	0.000191785	0	5.23049e-05	0.000383569	0	0.00024409	0.000156915	0	0.000261525	5.23049e-05	0	0	0.000122045	0	8.71748e-05	0.00024409	0	5.23049e-05	3.48699e-05	0	0.00010461	5.23049e-05	0	0.000191785	0.000366134	k__Bacteria;p__Actinobacteriota;c__Actinobacteria;o__Streptomycetales;f__Streptomycetaceae;g__Streptomyces
OTU_418	0	6.97399e-05	5.23049e-05	0	5.23049e-05	3.48699e-05	0	0	0	0	6.97399e-05	0.00010461	0	0	8.71748e-05	0	0.000226655	0.000278959	0	0.00010461	8.71748e-05	0	0	5.23049e-05	0	8.71748e-05	0.00010461	1.7435e-05	0	3.48699e-05	0	0.00020922	0	0	8.71748e-05	0.000191785	k__Bacteria;p__unidentified_Bacteria;c__Alphaproteobacteria;o__Micropepsales;f__Micropepsaceae;g__;s__
OTU_419	0	0	0	0	0	0	0	0.000435874	3.48699e-05	0	0	0	0	0	0	0	0	0	0	0	0	3.48699e-05	0	0	0	0	0	0	0	0	0	0	0	0	0	0	k__Bacteria;p__Actinobacteriota;c__Coriobacteriia;o__Coriobacteriales;f__Eggerthellaceae;g__Gordonibacter;s__
OTU_420	0	0	0	0	0	0	0	0	0	0	0	0	0	0	0	0	0.00020922	0.00010461	0	0	0	0	0	0	0	0	0	0	5.23049e-05	1.7435e-05	0	0.00020922	0	0	1.7435e-05	0	k__Bacteria;p__unidentified_Bacteria;c__Polyangia;o__Polyangiales;f__Sandaracinaceae;g__;s__
OTU_421	0	0	0	0	0	0	0	0.00017435	0.0010461	0	0	0	0	0	0	0	0	0	0	0	0	0	0	0	0	0	0	0	0	0	0	0	0	0	0	0	k__Bacteria;p__unidentified_Bacteria;c__Clostridia;o__Lachnospirales;f__Lachnospiraceae;g__;s__
OTU_422	0	0	0	0	0	0	0	0	0	0	0	0	0.000313829	0	0	8.71748e-05	0	0	0	0	0	0	0	0	3.48699e-05	0	0	0	0	0	0	0	8.71748e-05	0	0	0	k__Bacteria
OTU_423	5.23049e-05	0	0	0	0	0	0.000296394	0	0	0.00013948	0	0	0	0	0	0	0	0	0	0	0	0	0	0	8.71748e-05	0	0	0	0	0	0	0	0	0	0	0	k__Bacteria;p__Firmicutes;c__Negativicutes;o__Veillonellales-Selenomonadales;f__Veillonellaceae;g__Dialister;s__Dialister_sp_Marseille-P5638
OTU_424	0	0	0	6.97399e-05	0	0	1.7435e-05	0	0	3.48699e-05	0	0	0	0	0	0	0	0	0	0	0	0	0	0	0.000348699	0	0	0.000191785	0	0	0.000191785	0	0	0.000122045	0	0	k__Bacteria
OTU_425	0	0	0.000191785	8.71748e-05	3.48699e-05	0	1.7435e-05	0	3.48699e-05	0	5.23049e-05	0	1.7435e-05	5.23049e-05	0.000313829	0	0.000122045	5.23049e-05	0	0	0.000226655	6.97399e-05	0.00017435	8.71748e-05	6.97399e-05	6.97399e-05	0.000156915	0	0	0.00013948	0	5.23049e-05	3.48699e-05	1.7435e-05	0	0	k__Bacteria;p__Proteobacteria;c__Gammaproteobacteria;o__Xanthomonadales;f__Xanthomonadaceae;g__Stenotrophomonas;s__Stenotrophomonas_rhizophila
OTU_426	0.00017435	0	0	0	0	0	1.7435e-05	0	1.7435e-05	0	0	0	0	0	0	0	1.7435e-05	0	0	0	0	0	0	0	0	0	0	8.71748e-05	0	0	0	0	0	0.000470744	0	0	Unknown
OTU_427	0.0222121	0.0108969	0.0115071	0.0306507	0.0236069	0.0309296	0.0561755	0.0569426	0.0434131	0.0042367	0.00906618	0.00871748	0.0192482	0.0123788	0.00754934	0.0313132	0.0481903	0.0309819	0.000523049	0.00116814	0.00442848	0.0414952	0.0450171	0.0276693	0.0324639	0.019039	0.0239033	0.00477718	8.71748e-05	0.00451566	0.0074796	0.00181324	0.0193528	0.0596276	0.0247751	0.0245659	k__Bacteria;p__Firmicutes;c__Bacilli;o__Lactobacillales;f__Enterococcaceae;g__Enterococcus;s__Enterococcus_wangshanyuanii
OTU_428	0	6.97399e-05	0	1.7435e-05	0	0	0	0	0	0	0	0	0	6.97399e-05	6.97399e-05	0	1.7435e-05	1.7435e-05	0	0	0	0	6.97399e-05	0	0	0	1.7435e-05	0.000191785	0	0	6.97399e-05	5.23049e-05	0.00010461	5.23049e-05	0	0	k__Bacteria;p__unidentified_Bacteria;c__unidentified_Bacteria;o__Gemmatimonadales;f__Gemmatimonadaceae;g__;s__
OTU_429	0	1.7435e-05	0	0	3.48699e-05	0	0	0	0	0	0	0	0	0	0	0	1.7435e-05	0.000156915	0	0.000261525	0	0	3.48699e-05	0	0	8.71748e-05	0	0	0	0	0	0	0	0	0	0	k__Bacteria;p__Bacteroidota;c__Bacteroidia;o__Cytophagales;f__Cyclobacteriaceae;g__Algoriphagus;s__
OTU_430	0	0	0	0	0	0	0	0.000156915	0.000296394	0	0	0	0	0	0	0	0	0	0	0	0	0	0	0	0	0	0	0	0	0	0	0	0	0	0	0	k__Bacteria;p__Firmicutes;c__Clostridia;o__Clostridia_UCG-014;f__;g__;s__
OTU_431	0	0	0	0	0	0	0	0.000383569	0.000261525	0	5.23049e-05	0	1.7435e-05	0	3.48699e-05	0	0	0	3.48699e-05	0	0	6.97399e-05	0	0	0	0	0	0	0	0	0	0	0	0	0	0	k__Bacteria;p__Firmicutes;c__Clostridia;o__unidentified_Clostridia;f__Ruminococcaceae;g__;s__
OTU_432	0	0	0	0	0	0	0	0.000610224	0.00017435	0	0	0	0	0	0	0	0	0	0	0	0	0	0	0	0	0	0	0	0	0	0	0	0	0	0	0	k__Bacteria;p__Bacteroidota;c__Bacteroidia;o__Bacteroidales;f__Muribaculaceae;g__;s__
OTU_433	0	3.48699e-05	0.000122045	0	0	0	0	0	0	0	6.97399e-05	0	0	0	1.7435e-05	0	0	1.7435e-05	0	5.23049e-05	3.48699e-05	0	0	0	0	6.97399e-05	0.00010461	0	0	0	0	3.48699e-05	0	0	0.00013948	0.00013948	k__Bacteria
OTU_434	0	0	0	0	0	0	0	0.000401004	0.00017435	0	0	0	0	0	0	1.7435e-05	0	5.23049e-05	0	0	0	5.23049e-05	0	0	0	0	0	0	0	0	0	0	0	0	0	0	k__Bacteria;p__Firmicutes;c__Clostridia;o__Oscillospirales;f__Ruminococcaceae;g__UBA1819;s__
OTU_435	0	0	0	0	0	0.000122045	0	0	0	0	8.71748e-05	3.48699e-05	0	0	0	0	0	0.00013948	0	1.7435e-05	0	0	0	0	0	1.7435e-05	0.000122045	0	0	0	0	0	0	0	0	3.48699e-05	k__Bacteria;p__unidentified_Bacteria;c__Alphaproteobacteria
OTU_436	0	0	0	0	0	0	0.000313829	0	0	3.48699e-05	0	0	0	0	0	0	0	0	0	0	0	0	0	0	0.000122045	0	0	3.48699e-05	0	0	0	0	0	0	0	0	k__Bacteria;p__Firmicutes;c__Clostridia;o__Clostridia_UCG-014;f__;g__;s__
OTU_437	0	0.00017435	0	0	6.97399e-05	0.000122045	0	0	0	0	0	6.97399e-05	0	8.71748e-05	0	0	0.000122045	0.000488179	0	0	0	0	0	3.48699e-05	0	0.000156915	0.00020922	0	0	0	0	0	0	0	0	6.97399e-05	k__Bacteria;p__Acidobacteriota;c__Vicinamibacteria;o__Vicinamibacterales;f__Vicinamibacteraceae;g__;s__
OTU_438	0	3.48699e-05	3.48699e-05	0	0	6.97399e-05	0	0	0	0	3.48699e-05	0.000156915	0	1.7435e-05	6.97399e-05	0	1.7435e-05	3.48699e-05	0	5.23049e-05	0	0	0	1.7435e-05	0	3.48699e-05	0.00013948	0	1.7435e-05	0	0	0.00010461	0	0	0.000122045	0.00010461	k__Bacteria;p__Actinobacteriota;c__Actinobacteria;o__Corynebacteriales;f__Nocardiaceae;g__Nocardia
OTU_439	0	0	0	0	0	0	0	0	0	0	0.000156915	0	0	0	0	0	0	0	0	0	0	0	1.7435e-05	0	0	0	0	0	0	0	0	0	1.7435e-05	0	0.000261525	0	k__Bacteria;p__Proteobacteria;c__Gammaproteobacteria;o__Salinisphaerales;f__Solimonadaceae;g__Polycyclovorans;s__
OTU_440	0	6.97399e-05	3.48699e-05	0	5.23049e-05	5.23049e-05	0	0	0	0	5.23049e-05	0.00013948	0	3.48699e-05	5.23049e-05	0	0	0	0	5.23049e-05	5.23049e-05	0	0	0	0	3.48699e-05	6.97399e-05	0	0	0	0	0.00010461	0	0	6.97399e-05	8.71748e-05	k__Bacteria;p__unidentified_Bacteria;c__Alphaproteobacteria;o__Elsterales;f__;g__;s__
OTU_441	0	3.48699e-05	0.000191785	0	6.97399e-05	5.23049e-05	0	0	0	0	8.71748e-05	0.00010461	0	0	0.000156915	0	1.7435e-05	0.000122045	0	3.48699e-05	0.00020922	0	0	8.71748e-05	0	5.23049e-05	8.71748e-05	0	0	0.000191785	0	5.23049e-05	0	0	0.000156915	0.000191785	k__Bacteria;p__Verrucomicrobiota;c__Verrucomicrobiae;o__Opitutales;f__Opitutaceae;g__Opitutus;s__
OTU_442	0	0	0	0	0	0	0	0	0	0	0	0	0	0	0	0	0.000470744	0.000348699	0	0	0	0	0	0	0	0	0	0	0	0	0	0	0	0	0	0	k__Bacteria;p__Proteobacteria;c__Gammaproteobacteria;o__Alteromonadales;f__Alteromonadaceae;g__Rheinheimera
OTU_443	0	0	1.7435e-05	0	0	0	0	0	0	0	1.7435e-05	5.23049e-05	0	1.7435e-05	1.7435e-05	0	0.000122045	8.71748e-05	0	0.00013948	0.00013948	0	0	8.71748e-05	0	0	0	0	0	8.71748e-05	0	0.000610224	0	0	1.7435e-05	5.23049e-05	k__Bacteria;p__Bacteroidota;c__Bacteroidia;o__Chitinophagales;f__Chitinophagaceae;g__Flavisolibacter;s__
OTU_444	0	0	0	0	0	0	0	0.000296394	0.00020922	0	0	0	5.23049e-05	0	0	5.23049e-05	0	0	0	0	0	0	0	0	0	0	0	0	0	0	0	0	0	0	0	0	k__Bacteria;p__Actinobacteriota;c__Coriobacteriia;o__Coriobacteriales;f__Eggerthellaceae;g__Enterorhabdus;s__
OTU_445	0	0	0	0	0	0	0	0	0	0	0	0.00020922	0	0	0	0	0.00013948	0	0	5.23049e-05	0	0	0	0	0	0	0	0	0	0	0	6.97399e-05	0	0	0	0.00010461	k__Bacteria;p__unidentified_Bacteria;c__Polyangia;o__Polyangiales;f__Sandaracinaceae;g__unidentified_Sandaracinaceae;s__delta_proteobacterium_LX33
OTU_446	3.48699e-05	0	0	1.7435e-05	0	0	1.7435e-05	0	0	8.71748e-05	0	0	0	0	0	0	0	0	0	0	0	0	0	0	0.000313829	0	0	0.00013948	0	0	6.97399e-05	0	0	8.71748e-05	0	0	k__Bacteria;p__Proteobacteria;c__Gammaproteobacteria;o__Run-SP154;f__;g__;s__
OTU_447	0	0	0	8.71748e-05	0	0	0.000122045	0	0	0	0	0	0	0	0	0	0	0	0	0	0	0	0	0	0.000226655	0	0	0	0	0	0	0	0	0	0	0	k__Bacteria
OTU_448	0	0	0	0	0	0	0	0.00024409	0.000261525	0	0	0	0	0	0	0	0	0	0	0	0	0	0	0	0	0	0	0	0	0	0	0	0	0	0	0	k__Bacteria;p__Firmicutes;c__Clostridia;o__unidentified_Clostridia;f__Ruminococcaceae;g__;s__
OTU_449	0	0	0	0	0	0	0	0.000261525	0.000122045	0	0	0	0	0	0	0	0	0	0	0	0	0	0	0	0	0	0	0	0	0	0	0	0	0	0	0	k__Bacteria
OTU_450	0	0	8.71748e-05	0	0.00013948	0	0	0	0	0	0	0.000122045	0	0	3.48699e-05	0	3.48699e-05	1.7435e-05	0	8.71748e-05	0	0	0	3.48699e-05	0	0.000122045	1.7435e-05	0	0	0	0	5.23049e-05	0	0	3.48699e-05	0.00010461	k__Bacteria;p__Acidobacteriota;c__Acidobacteriae;o__Bryobacterales;f__Bryobacteraceae;g__Bryobacter;s__
OTU_451	0	0	0	0	0	0	0	0	0	0	0	1.7435e-05	0	0	0	0	1.7435e-05	0	0	0	0	0	1.7435e-05	5.23049e-05	0	0	0	0	0	0	0	0.00020922	0.00010461	0	0	0	k__Bacteria;p__unidentified_Bacteria;c__Saccharimonadia;o__Saccharimonadales
OTU_452	3.48699e-05	0	0	0	5.23049e-05	0	0	0	0	0	0	5.23049e-05	0	0	0	0	0.000261525	0.000191785	0	0	0	0	0	0	8.71748e-05	6.97399e-05	0	0	0	0	0	0	0	1.7435e-05	0	0	k__Bacteria;p__unidentified_Bacteria;c__Bacteroidia;o__Chitinophagales;f__Saprospiraceae;g__;s__
OTU_453	0	0	1.7435e-05	0	0	0	0	0	0	0	0	0	0	0	0	0	1.7435e-05	0	0	0	1.7435e-05	0	0	0	0	0	0	0	0	0	0	0.000278959	0	0	0	0	k__Bacteria;p__Bacteroidota;c__Bacteroidia;o__Chitinophagales;f__Chitinophagaceae;g__Pseudoflavitalea;s__Flavitalea_soli
OTU_454	0	0	0	0	0	0	0	0	0	5.23049e-05	0	0	0	0	0	0	0	0	0	0	0	0	0	0	3.48699e-05	0	0	0.000191785	0	0	0.00010461	0	0	0.00010461	0	0	k__Bacteria;p__Proteobacteria;c__Gammaproteobacteria;o__Alteromonadales;f__Alteromonadaceae;g__Rheinheimera;s__Pararheinheimera_chironomi
OTU_455	0	0.00017435	0	0	0	0	0	0	0	0	0	0	0	0.00024409	0	0	0	0	0	0	0	0	0	0	0	0	0	0	0	0	0	0	0	0	0	0	k__Bacteria;p__Proteobacteria;c__Gammaproteobacteria;o__Enterobacterales;f__Morganellaceae;g__Buchnera;s__
OTU_456	0	0	0	0	0	0	0	0	0	0	1.7435e-05	0	0	0	0	0	5.23049e-05	1.7435e-05	0	5.23049e-05	3.48699e-05	0	0	1.7435e-05	0	0	0	0	0	0	0	0.000435874	0	0	0	0	k__Bacteria;p__Verrucomicrobiota;c__Verrucomicrobiae;o__Chthoniobacterales;f__Chthoniobacteraceae;g__Chthoniobacter;s__
OTU_457	0	0	0	0	0	0	0	0.000313829	0.000278959	0	0	0	0	0	0	0	0	0	0	0	0	0	0	0	0	0	0	0	0	0	0	0	0	0	0	0	k__Bacteria;p__Firmicutes;c__Clostridia;o__Peptostreptococcales-Tissierellales;f__Anaerovoracaceae;g__Family_XIII_UCG-001;s__
OTU_458	0	5.23049e-05	0.00017435	6.97399e-05	0	0	0	0	0	0	5.23049e-05	5.23049e-05	1.7435e-05	0	0.000122045	0	0.000313829	8.71748e-05	0	5.23049e-05	1.7435e-05	0	0	8.71748e-05	8.71748e-05	1.7435e-05	6.97399e-05	8.71748e-05	0	0.000156915	5.23049e-05	0.000156915	6.97399e-05	0.00010461	0	3.48699e-05	k__Bacteria;p__Proteobacteria;c__Alphaproteobacteria;o__Rhizobiales;f__Beijerinckiaceae;g__Bosea;s__
OTU_459	0	0	0	0	0	0	0	0.000802009	0.000523049	0	0	0	0	0	0	0	0	0	0	0	0	1.7435e-05	0	0	0	0	0	0	0	0	0	0	0	0	0	0	k__Bacteria;p__Bacteroidota;c__Bacteroidia;o__Bacteroidales;f__Muribaculaceae;g__;s__
OTU_460	0	0	0	0	0	0	0	0.00024409	5.23049e-05	0	0	0	0	0	0	0	0	0	0	0	0	0	0	0	0	0	0	0	0	0	0	0	0	0	0	0	k__Bacteria
OTU_461	3.48699e-05	0	0	1.7435e-05	0	0	5.23049e-05	0.000122045	8.71748e-05	0	0	0	0	0	0	0	0	0	0	0	0	0	0	0	0	0	0	0	0	0	0	0	0	0	0	0	k__Bacteria
OTU_462	0	0	0	0	0	0	0	0	0	0	0	0	0	0	0	0	0	3.48699e-05	0	0	0	0	0	0	0	0	0	0	0.000645094	0	0	3.48699e-05	0	0	0	0	k__Bacteria;p__Cyanobacteria;c__Cyanobacteriia;o__Chloroplast;f__unidentified_Chloroplast;g__unidentified_Chloroplast
OTU_463	0	0	0	0	0	0	0	0	0	0	0	0	0	0	0	0	0	1.7435e-05	0	0	0	0	0	0	0	0	0	0	0	0	0	0.000313829	0	0	0	0	k__Bacteria;p__Planctomycetes;c__unidentified_Planctomycetes;o__Isosphaerales;f__Isosphaeraceae;g__Singulisphaera;s__
OTU_464	0	0	0	0.000296394	0	0	0	0	0	0	0	0	0	0	0	0	0	0	0	0	0	0	0	0	6.97399e-05	0	0	0	0	0	0	6.97399e-05	0	0	0	0	k__Bacteria
OTU_465	0	0	0	0	0	0	0	0.000348699	0.000122045	0	8.71748e-05	0	0	0	0	0	5.23049e-05	0	1.7435e-05	0	0	0	0	0	0	0	0	0	0	0	0	0	0	0	0.000191785	0	k__Bacteria;p__Bacteroidota;c__Bacteroidia;o__Bacteroidales;f__Muribaculaceae;g__;s__
OTU_466	0	3.48699e-05	1.7435e-05	0	3.48699e-05	0	0	0	0	0	1.7435e-05	3.48699e-05	0	1.7435e-05	5.23049e-05	0	0.000348699	8.71748e-05	0	0.000366134	1.7435e-05	0	6.97399e-05	5.23049e-05	0	5.23049e-05	1.7435e-05	0	0	0	0	0.00010461	0	0	1.7435e-05	6.97399e-05	k__Bacteria;p__Bacteroidota;c__Bacteroidia;o__Chitinophagales;f__Chitinophagaceae;g__Terrimonas;s__
OTU_467	0	0	0	0	0	0	0	0.00020922	0.00020922	0	0	0	0	0	0	3.48699e-05	0	0	0	0	0	0	0	0	0	0	0	0	0	0	0	0	0	0	0	0	k__Bacteria;p__Actinobacteriota;c__Coriobacteriia;o__Coriobacteriales;f__Eggerthellaceae;g__Parvibacter;s__
OTU_468	0	0	0	0	0	0	0	0	0	0	0	5.23049e-05	0	0	0	0	0	0	0	0	8.71748e-05	0	0	8.71748e-05	0	0	0	0	0	6.97399e-05	0	0	0	0	0	3.48699e-05	k__Bacteria;p__Acidobacteriota;c__Acidobacteriae;o__Solibacterales;f__Solibacteraceae;g__Candidatus_Solibacter;s__
OTU_469	0	0	0	0	0	0	0	0	0	0	0	3.48699e-05	1.7435e-05	0	0	0	0	0.000261525	0	0	0	0	0	0	0	0	0	0	0	0	0	0	0	0	0	3.48699e-05	k__Bacteria;p__Proteobacteria;c__Gammaproteobacteria
OTU_470	0	0	0	0	0	0	0	0	0	0	0	0	0	0	0	0	0	0	0	0	0	0	0	0	0	0	0	0	0.000313829	0	0	0	0	0	0	0	k__Bacteria;p__Proteobacteria;c__Alphaproteobacteria;o__Rhizobiales;f__Beijerinckiaceae;g__1174-901-12;s__
OTU_471	0	0	0.00017435	0	0	0	0	0	0	0	3.48699e-05	0	0	0	0.00013948	0	0.00010461	0.000122045	0	0	0.00010461	0	0	6.97399e-05	0	0	3.48699e-05	0	0	0.000156915	0	0.000313829	0	0	1.7435e-05	1.7435e-05	k__Bacteria;p__Proteobacteria;c__Alphaproteobacteria;o__Caulobacterales;f__Caulobacteraceae;g__Asticcacaulis
OTU_472	0	0	0	0	0	0	3.48699e-05	0.000523049	0.000383569	0	0	0	0	0	0	0	0	0	0	0	0	1.7435e-05	0	0	0	0	0	0	0	0	0	0	0	0	0	0	k__Bacteria;p__Firmicutes;c__Clostridia;o__Clostridia_UCG-014;f__;g__;s__
OTU_473	0	0	0	0	0	0	0	0	0.000348699	0	0	0	0	0	0	0	0	0	1.7435e-05	0	0	0	0	0	0	0	0	0	0	0	0	0	0	0	0	0	k__Bacteria;p__Firmicutes;c__Clostridia;o__Peptococcales;f__Peptococcaceae;g__Peptococcus;s__
OTU_474	1.7435e-05	0	0	6.97399e-05	0	0	3.48699e-05	0	0	0.000122045	0	0	0	0	0	0	0	0	0	0	0	0	8.71748e-05	0	0.000732269	0	0	0.000191785	0	0	0.000226655	0	0	0.000226655	0	0	k__Bacteria;p__Proteobacteria;c__Gammaproteobacteria;o__Burkholderiales;f__Rhodocyclaceae;g__Sulfuritalea;s__
OTU_475	0	0	0	0	5.23049e-05	0	0	0	0	0	0.000156915	3.48699e-05	0	0	0	0	1.7435e-05	6.97399e-05	0	0	3.48699e-05	0	0	6.97399e-05	0	0	5.23049e-05	0	0	3.48699e-05	0	0	0	0	5.23049e-05	5.23049e-05	k__Bacteria;p__unidentified_Bacteria;c__Alphaproteobacteria;o__Rhizobiales;f__;g__;s__
OTU_476	0	3.48699e-05	0	0	5.23049e-05	0.00013948	0	0	0	0	0.000122045	0	0	0	0.000122045	0	0.00024409	0.000331264	0	1.7435e-05	1.7435e-05	0	0	6.97399e-05	0	1.7435e-05	3.48699e-05	0	3.48699e-05	6.97399e-05	0	5.23049e-05	0	0	0	3.48699e-05	k__Bacteria;p__unidentified_Bacteria;c__Alphaproteobacteria;o__Rhodospirillales;f__Rhodospirillaceae;g__;s__
OTU_477	0	1.7435e-05	1.7435e-05	0	0	0	0	0	0	0	1.7435e-05	0.00013948	0	0	3.48699e-05	0	0	0	0	1.7435e-05	0	0	0	0	0	1.7435e-05	1.7435e-05	0	0	0	0	0	0	0	0	1.7435e-05	k__Bacteria;p__unidentified_Bacteria;c__Acidimicrobiia;o__;f__;g__;s__
OTU_478	1.7435e-05	0	0	3.48699e-05	0	0	3.48699e-05	0	0	3.48699e-05	0	0	0	0	0	0	0	0	0	0	0	0	0	0	0.000435874	0	0	1.7435e-05	0	0	0.00010461	0	0	1.7435e-05	0	0	k__Bacteria;p__Proteobacteria;c__Gammaproteobacteria;o__Cellvibrionales;f__Spongiibacteraceae;g__;s__
OTU_479	0	0	0	0	0	0	0	0.000732269	0.000278959	0	0	0	0	0	0	0	0	0	0	0	0	0	0	0	0	0	0	0	0	0	0	0	0	0	0	0	k__Bacteria;p__Firmicutes;c__Clostridia;o__Clostridia_UCG-014;f__;g__;s__
OTU_480	0	0	0	0.000296394	0	0	8.71748e-05	0	1.7435e-05	0	0	0	0	0	0	0	0	0	0	0	0	0	0	0	3.48699e-05	0	0	0	0	0	0	0	0	0	0	0	k__Bacteria
OTU_481	0	1.7435e-05	0	0	0.00010461	3.48699e-05	0	0	0	0	6.97399e-05	3.48699e-05	0	0	8.71748e-05	0	0	0	0	0	0	0	0	0	0	1.7435e-05	0	0	0	0	0	3.48699e-05	0	0	1.7435e-05	5.23049e-05	k__Bacteria
OTU_482	0	0	0	0	0	0	0	0.00017435	6.97399e-05	0	0	0	0	0	0	0	0	0	0	0	0	3.48699e-05	0	0	0	0	0	0	0	0	0	0	0	0	0	0	k__Bacteria;p__Actinobacteriota;c__Coriobacteriia;o__Coriobacteriales;f__Eggerthellaceae
OTU_483	0	0.000122045	0.00013948	0	0.000191785	0.000156915	0	0	0	0	0.00017435	0.00017435	0	0.00010461	0.000191785	0	1.7435e-05	0.00013948	0	5.23049e-05	3.48699e-05	0	0	1.7435e-05	0	0.000122045	8.71748e-05	0	0	0	0	6.97399e-05	0	0	0.000226655	0.000122045	k__Bacteria;p__Firmicutes;c__Bacilli;o__Bacillales;f__Planococcaceae;g__Sporosarcina;s__
OTU_484	0	0	0	0	0	0	0	0	0	0	0	0	0	0	0	0	0	0	0	0.000122045	0	0	0	0	8.71748e-05	0	0	6.97399e-05	0	0	0	0	0	0	0	0	Unknown
OTU_485	0	3.48699e-05	0	0	0	0	0	0	0	0	3.48699e-05	3.48699e-05	0	0	0	0	0	0	0	0	0	0	0	0	0	1.7435e-05	0	0	0	0	0	0.00010461	0	0	0	1.7435e-05	k__Bacteria;p__Proteobacteria;c__Gammaproteobacteria;o__Burkholderiales;f__Burkholderiaceae;g__Ralstonia;s__
OTU_486	0	0	0	0	0	0	0	0	0	0	0	6.97399e-05	0	0	0	0	8.71748e-05	0	0	0	0	0	0	0	0	1.7435e-05	0	0	0	0	0	6.97399e-05	0	0	3.48699e-05	0	k__Bacteria;p__Kapabacteria;c__unidentified_Kapabacteria;o__Kapabacteriales;f__;g__;s__
OTU_487	0	0	0	0	0	0	0	0	0	0	0	0	0	0	0	0	3.48699e-05	0	0	1.7435e-05	0	0	0	0	0	0	0	0	0	0	0	0.000575354	0	0	0	1.7435e-05	k__Bacteria;p__Bacteroidota;c__Bacteroidia;o__Chitinophagales;f__Chitinophagaceae;g__Edaphobaculum;s__
OTU_488	0	0	0	0	0	0	0	0.000191785	0.000331264	0	0	0	0	0	0	1.7435e-05	0	0	0	0	0	0	0	0	0	0	0	0	0	0	0	0	0	0	0	0	k__Bacteria;p__Firmicutes;c__Clostridia;o__Clostridia_UCG-014;f__;g__;s__
OTU_489	0	0	0	0	0	0	0	0.000523049	0.000296394	0	0	0	0	0	0	0	0	0	3.48699e-05	0	0	0	0	0	0	0	0	0	0	0	0	0	0	0	0	0	k__Bacteria;p__Bacteroidota;c__Bacteroidia;o__Bacteroidales;f__Rikenellaceae;g__Alistipes;s__
OTU_490	0	0	0	0	0	0	0	0	0	0	0	0	0.000348699	0	0	0	0	0	0	0	0	0	0	0	0	0	0	0	0	0	0	0	0	0	0	0	k__Bacteria;p__unidentified_Bacteria;c__Gammaproteobacteria;o__unidentified_Gammaproteobacteria;f__unidentified_Gammaproteobacteria;g__;s__
OTU_491	0	1.7435e-05	0	0	0.000331264	1.7435e-05	0	0	0	0	0	0	0	0	0	0	0	0	0	6.97399e-05	0	0	0	0	0	0.00020922	6.97399e-05	0	0	0	0	0	0	0	0	0	k__Bacteria;p__Verrucomicrobiota;c__Verrucomicrobiae;o__Verrucomicrobiales;f__Rubritaleaceae;g__Luteolibacter;s__
OTU_492	0	0	0	0	0	0	3.48699e-05	0	0	0	0	0	0	0	0	0	0	0	0	0	0	0	0	0	3.48699e-05	0	0	0	0	0	0	0	0	0.00013948	0	0	k__Bacteria
OTU_493	0	0	0	0	3.48699e-05	8.71748e-05	5.23049e-05	0	0	0	1.7435e-05	8.71748e-05	0	5.23049e-05	3.48699e-05	0	0	3.48699e-05	0	0	0	1.7435e-05	0.00010461	1.7435e-05	0	5.23049e-05	0	0	0	0	0	0	3.48699e-05	0	0	6.97399e-05	k__Bacteria;p__unidentified_Bacteria;c__Acidobacteriae;o__Acidobacteriales;f__;g__;s__
OTU_494	0	0	0	0	0	0	0	0.00017435	0.000261525	0	0	0	0	0	0	0	0	0	0	0	0	0	0	0	0	0	0	0	0	0	0	0	0	0	0	0	k__Bacteria;p__unidentified_Bacteria;c__Clostridia;o__Lachnospirales;f__Lachnospiraceae;g__;s__
OTU_495	0	0	3.48699e-05	0	0	0	0	0	0	0	0	0	0	0	0	0	0	0	0	0.000226655	0	0	1.7435e-05	0	0	1.7435e-05	1.7435e-05	0	0	0	5.23049e-05	0	5.23049e-05	5.23049e-05	0	0	k__Bacteria;p__Bacteroidota;c__Bacteroidia;o__Chitinophagales;f__Chitinophagaceae;g__Ferruginibacter;s__
OTU_496	0	0	0	0	0	0	0	0	0	0	0.000296394	3.48699e-05	0	0	0	0	0	0	0	0	5.23049e-05	0	0	5.23049e-05	0	0	0	0	0	0	0	0	0	0	1.7435e-05	0	k__Bacteria;p__Bacteroidota;c__Bacteroidia;o__Bacteroidales;f__Prevotellaceae;g__Prevotella;s__Prevotella_sp_oral_clone_DA058
OTU_497	0	0	0	0	0	1.7435e-05	0	0	0	0	0.00017435	3.48699e-05	0	0	0	0	0	3.48699e-05	0	0	8.71748e-05	0	0	0	0	1.7435e-05	3.48699e-05	0	0	0	0	0	0	0	0.000278959	0	k__Bacteria;p__Verrucomicrobiota;c__Verrucomicrobiae;o__Pedosphaerales;f__Pedosphaeraceae;g__Ellin517;s__
OTU_498	0	0	0	0	0	0	0.000505614	0	0	3.48699e-05	0	0	0	0	0	0	0	0	0	0	0	0	0	0	0.000296394	0	0	0	0	0	0	0	0	1.7435e-05	0	0	k__Bacteria;p__Firmicutes;c__Bacilli;o__Erysipelotrichales;f__Erysipelotrichaceae;g__Holdemanella;s__
OTU_499	0	0	0	0.000191785	0	0	0	5.23049e-05	0	0	0	0	0	0	0	0	0	0	0	0	0	0	0	0	0	0	0	0	0	0	0	0	0	0	0	0	k__Bacteria
OTU_500	0	0	0	0	0	6.97399e-05	0	0	0	0	0	3.48699e-05	0	0	3.48699e-05	0	0	0	0	0.00010461	0	0	0	0.000122045	0	3.48699e-05	5.23049e-05	0	0	0	0	0.000627659	3.48699e-05	0	6.97399e-05	3.48699e-05	k__Bacteria;p__unidentified_Bacteria;c__Bacteroidia;o__Chitinophagales;f__Chitinophagaceae
OTU_501	0	0	0	0	0	0	0	0	0	0	0	0.00020922	0	1.7435e-05	0	0	0	3.48699e-05	0	0	0	0	0	8.71748e-05	0	0	0	0	0	0	0	0	0	0	0	3.48699e-05	k__Bacteria
OTU_502	0	0	0	0	0	0	0	0.000296394	0.00013948	0	0	0	0	0	0	0	0	0	0	0	0	0	0	0	0	0	0	0	0	0	0	0	0	0	0	0	k__Bacteria;p__Bacteroidota;c__Bacteroidia;o__Bacteroidales;f__Muribaculaceae;g__;s__
OTU_503	0	0	0	0	0	0	0	0.000697399	0.000331264	0	0	0	0	0	0	0	0	0	0	0	0	0	0	0	0	0	0	0	0	0	0	0	0	0	0	0	k__Bacteria;p__Firmicutes;c__Clostridia;o__Lachnospirales;f__Lachnospiraceae
OTU_504	1.7435e-05	0	0	0	0	0	0.000313829	0	0	3.48699e-05	0.000156915	0	0	0	3.48699e-05	0	0	0	0	0	0	0	0	0	5.23049e-05	3.48699e-05	0	3.48699e-05	0	0	5.23049e-05	0	0	0	0	0	k__Bacteria;p__unidentified_Bacteria;c__Clostridia;o__Oscillospirales;f__Ruminococcaceae;g__;s__
OTU_505	0	0	0	0	0	0	6.97399e-05	0	0	0	0	0	0	0	0	0	0	0	0	0.00013948	0	0	0	0	0	0	0	0	0	0	0	0	0	0	0	0	k__Bacteria
OTU_506	0	0	0	6.97399e-05	0	0	0	0	0	0	0	0	0	0	0	0	0	0	0	0	0	0	0	0	8.71748e-05	0	0	0.000122045	0	0	8.71748e-05	0	0	1.7435e-05	0	0	k__Bacteria;p__Actinobacteriota;c__Actinobacteria;o__PeM15;f__;g__;s__
OTU_507	0	0	0	0	0	0	0	8.71748e-05	0.000191785	0	0	0	0	0	0	0	0	0	3.48699e-05	0	0	1.7435e-05	0	0	0	0	0	0	0	0	0	0	0	0	0	0	k__Bacteria
OTU_508	0	1.7435e-05	1.7435e-05	0	0	0	0	3.48699e-05	0	0	0	0.000122045	0	0	6.97399e-05	0	8.71748e-05	0	0	0	0	0	0	0	0	1.7435e-05	0	0	0	0	0	0	0	0	1.7435e-05	0	k__Bacteria;p__unidentified_Bacteria;c__Acidimicrobiia;o__Microtrichales;f__;g__;s__
OTU_509	0	0	0	0	0	0	0	0.000226655	0	0	0	0	0	0	0	0	0	0	0	0	0	0	0	0	0	0	0	0	0	0	0	0	0	0	0	0	k__Bacteria;p__Firmicutes;c__Clostridia;o__Lachnospirales;f__Lachnospiraceae;g__Roseburia;s__
OTU_510	0	0	0	0	0	0	0	0.00010461	0.00010461	0	1.7435e-05	0	0	0	0	0	0	0	0	0	0	0	0	0	0	0	0	0	0	0	0	0	0	0	5.23049e-05	0	k__Bacteria;p__Firmicutes;c__Clostridia;o__Peptostreptococcales-Tissierellales;f__Anaerovoracaceae;g__Family_XIII_AD3011_group;s__
OTU_511	0	0	0	0	0	0	0	0.000278959	0.000505614	0	0	0	0	0	0	0	0	0	1.7435e-05	0	0	0	0	0	0	0	0	0	0	0	0	0	0	0	0	0	k__Bacteria;p__unidentified_Bacteria;c__Clostridia;o__Lachnospirales;f__Lachnospiraceae;g__;s__
OTU_512	1.7435e-05	0	0	0	0	0	0.00013948	0	0	0	0	0	0	0	0	0	0	0	0	0	0	0	0	0	0	0	0	0	0	0	3.48699e-05	0	0	0	0	0	k__Bacteria;p__Firmicutes;c__Clostridia;o__Lachnospirales;f__Lachnospiraceae;g__Agathobacter;s__Eubacterium_ramulus
OTU_513	0	0	0	0	0	0	0	0.000924053	0.000401004	0	0	0	0	0	0	0	0	0	0	0	0	1.7435e-05	0	0	0	0	0	0	0	0	0	0	0	0	0	0	k__Bacteria;p__Actinobacteriota;c__Coriobacteriia;o__Coriobacteriales;f__Eggerthellaceae;g__Enterorhabdus;s__
OTU_514	1.7435e-05	0	0	3.48699e-05	0	0	0.00013948	0	0	5.23049e-05	0	0	0	0	0	0	0	0	0	0	0	0	0	0	0	0	0	3.48699e-05	0	0	3.48699e-05	0	0	3.48699e-05	0	0	k__Bacteria;p__Proteobacteria;c__Gammaproteobacteria;o__Burkholderiales;f__Oxalobacteraceae;g__Herbaspirillum;s__Herbaspirillum_huttiense
OTU_515	0	0	0	0	0	0	0.000383569	0	0	0	0	0	0	0	0	0	0	0	0	0	0	0	0	0	0	0	0	0	0	0	0	0	0	0	0	0	k__Bacteria
OTU_516	0	0	0	1.7435e-05	5.23049e-05	6.97399e-05	0	0	0	0	6.97399e-05	3.48699e-05	0	3.48699e-05	6.97399e-05	0	0.00017435	0.000261525	0	0	0	0	0	1.7435e-05	0	0	6.97399e-05	0	3.48699e-05	0	0	6.97399e-05	0	0	0.00010461	1.7435e-05	k__Bacteria;p__Myxococcota;c__Myxococcia;o__Myxococcales;f__Myxococcaceae;g__P3OB-42;s__
OTU_517	0	0	0	0	0	0	0	3.48699e-05	3.48699e-05	0	0	0	0	0	0	0	0	0	0	0	0	0	0	0	0	0	0	3.48699e-05	0	0	0	0.000366134	0	0	0	0	Unknown
OTU_518	0	0	0	0	3.48699e-05	0	0	0	0	0	0	0	0	1.7435e-05	0	0	0	0	0	0	3.48699e-05	0	8.71748e-05	0	0	5.23049e-05	0	0	0	0	0	0	6.97399e-05	0	0	0	k__Bacteria;p__Bacteroidota;c__Bacteroidia;o__Chitinophagales;f__Chitinophagaceae;g__Edaphobaculum;s__
OTU_519	0	0	0	3.48699e-05	0	0	0	0	6.97399e-05	0	0	0	0	0	0	0	3.48699e-05	0	0	3.48699e-05	0	0	0	0	0	0	0	0	0	0	0	0	0	0.00020922	0	0	k__Bacteria
OTU_520	0	0	0	0	0	0	0	0	0	0	0	0	0	0	0	0	0	0	0	0	0	0	0	0	0	0	0	0	0	0	0	0.000592789	0	0	0	0	k__Bacteria
OTU_521	0	0	0.00017435	0	0	0	0	0	0	0	0	0	0	0	1.7435e-05	0	0	0	0	0	0	0	0	0	0	0	0	0	0	5.23049e-05	0	0	0	0	3.48699e-05	0	k__Bacteria;p__Actinobacteriota;c__Actinobacteria;o__Micrococcales;f__Micrococcaceae;g__Rothia;s__
OTU_522	0	0	6.97399e-05	0	3.48699e-05	0	0	0	0	0	5.23049e-05	8.71748e-05	0	1.7435e-05	5.23049e-05	0	0	0	0	6.97399e-05	0	0	0	0	0	1.7435e-05	6.97399e-05	0	0	0	0	0.000366134	0	0	1.7435e-05	8.71748e-05	k__Bacteria;p__Proteobacteria;c__Alphaproteobacteria;o__Micropepsales;f__Micropepsaceae
OTU_523	0	0	0	0	0	3.48699e-05	0	0	0	0	0	0	0	0	0	0	1.7435e-05	8.71748e-05	0	0.000156915	0	0	0	0	0	0	0	0	0	0	0	3.48699e-05	0	0	0	0	k__Bacteria;p__Bacteroidota;c__Bacteroidia;o__Chitinophagales;f__Chitinophagaceae;g__Flavihumibacter;s__
OTU_524	0	0	0	0	0	0	0	0	0	0	1.7435e-05	0	0	0	0	0	0	0	0	0	0	0	0	0	0	0	0	0	0	0	0	0	0	0	0.00013948	0	k__Bacteria;p__unidentified_Bacteria;c__Alphaproteobacteria;o__Kiloniellales;f__Fodinicurvataceae;g__;s__
OTU_525	0	5.23049e-05	5.23049e-05	0	1.7435e-05	0	0	0	0	0	3.48699e-05	0	0	1.7435e-05	3.48699e-05	0	0	0	0	0	0	0	0	0	0	0	0	0	0	0	0	3.48699e-05	3.48699e-05	0	0	0	k__Bacteria;p__Myxococcota;c__Polyangia;o__Haliangiales;f__Haliangiaceae;g__Haliangium;s__
OTU_526	0	5.23049e-05	0.00010461	0	0	0	0	0	0	0	0	0	0	3.48699e-05	0.00013948	0	0.00020922	6.97399e-05	0	6.97399e-05	3.48699e-05	0	0	0	0	1.7435e-05	0	0	0	0	0	0.00013948	0	0	0	1.7435e-05	k__Bacteria;p__Bacteroidota;c__Bacteroidia;o__Sphingobacteriales;f__Sphingobacteriaceae;g__Pedobacter;s__
OTU_527	0	0	0	0	0	0	0	0	0	0	0	0	0	0	0	0.000278959	1.7435e-05	0	0	0	0	0	0	0	0	0	0	0	0	0	0	0	0	0	5.23049e-05	0	k__Bacteria;p__Actinobacteriota;c__Actinobacteria;o__Pseudonocardiales;f__Pseudonocardiaceae;g__Pseudonocardia
OTU_528	0	5.23049e-05	0	0	0.000261525	1.7435e-05	0	0	0	0	0	0	0	0.00010461	0	0	3.48699e-05	8.71748e-05	0	0.000278959	0	0	1.7435e-05	0	0	0.000348699	0	0	0	0	0	6.97399e-05	0	0	0	5.23049e-05	k__Bacteria;p__Bacteroidota;c__Bacteroidia;o__Chitinophagales;f__Chitinophagaceae;g__Parasegetibacter;s__
OTU_529	0	0	0	0	0	0	0	0.000278959	0.00017435	0	0	0	5.23049e-05	0	0	0	0	0	1.7435e-05	0	0	0	0	0	0	0	0	0	0	0	0	0	0	0	0	0	k__Bacteria;p__Actinobacteriota;c__Coriobacteriia;o__Coriobacteriales;f__Eggerthellaceae
OTU_530	0	0	0	0	0	0	0	0	0	0	0	0	0	0	0	0	0	0	0	0	0	0	0	0	0	0	0	0	0	0	0.000278959	0	0	0	0	0	k__Bacteria
OTU_531	0.100495	0.102831	0.0898598	0.0844027	0.0765918	0.0803926	0.0175919	0.00655555	0.00859544	0.0167201	0.0116989	0.0197887	0.0237464	0.0313132	0.0298138	0.00137736	0.00666016	0.00690425	0.0298487	0.0360206	0.0439536	0.0116291	0.0284887	0.0174873	0.0541181	0.047981	0.0492189	0.10175	0.122969	0.10243	0.0863205	0.0589651	0.0706814	0.0610398	0.0576226	0.0575877	k__Bacteria;p__Proteobacteria;c__Gammaproteobacteria;o__Enterobacterales;f__Enterobacteriaceae;g__Enterobacter
OTU_532	0	3.48699e-05	5.23049e-05	0	0	6.97399e-05	0	0	0	0	8.71748e-05	5.23049e-05	0	3.48699e-05	8.71748e-05	0	1.7435e-05	0	0	1.7435e-05	0	0	3.48699e-05	0	0	1.7435e-05	6.97399e-05	0	0	0	0	1.7435e-05	0	0	5.23049e-05	5.23049e-05	k__Bacteria;p__Actinobacteriota;c__Actinobacteria;o__Propionibacteriales;f__Nocardioidaceae;g__Nocardioides;s__Nocardioides_sp
OTU_533	0	0	0	0	0	0	0	0.00017435	3.48699e-05	0	0	0	0	0	0	0	0	0	3.48699e-05	0	0	0	0	0	0	0	0	0	0	0	0	0	0	0	0	0	k__Bacteria;p__unidentified_Bacteria;c__Clostridia;o__;f__;g__;s__
OTU_534	0	0	0	0	1.7435e-05	3.48699e-05	0	0	0	0	0	3.48699e-05	0	0	0	0	0	0	0	0	1.7435e-05	0	0	0	0	0	0	0	0.000453309	0	0	0	0	0	0	0	k__Bacteria;p__Firmicutes;c__Bacilli;o__Bacillales;f__Bacillaceae;g__Anoxybacillus;s__Anoxybacillus_flavithermus
OTU_535	0	3.48699e-05	3.48699e-05	0	0	0	0	0	0	0	0	0	0	5.23049e-05	8.71748e-05	0	0	3.48699e-05	0	0	5.23049e-05	0	1.7435e-05	3.48699e-05	3.48699e-05	0	3.48699e-05	0	0	3.48699e-05	3.48699e-05	6.97399e-05	0	0	6.97399e-05	0	k__Bacteria;p__Actinobacteriota;c__Acidimicrobiia;o__Microtrichales;f__Iamiaceae;g__Iamia
OTU_536	0	0	0	0	0	0	0	0	0	0	0	0	0	0	1.7435e-05	0	0	3.48699e-05	0	0	0	0	0.00010461	0	0	1.7435e-05	0	0	0	0	0	0	0	0	0	0	k__Bacteria;p__Proteobacteria;c__Gammaproteobacteria;o__Burkholderiales;f__SC-I-84;g__;s__
OTU_537	0	0	0	0	0	0	0	0	0	0	0	0	0	0	0	0	0	0	0	0	0	0	0.00020922	0	0	0	0	0	0	0	0	0	0.000296394	0	0	0	k__Bacteria;p__Acidobacteriota;c__Holophagae;o__Subgroup_7;f__;g__;s__
OTU_538	1.7435e-05	0	0	0	0	0	0.000226655	0	0	3.48699e-05	0	0	0	0	0	0	0	0	0	0	0	0	0	0	8.71748e-05	0	0	1.7435e-05	0	0	0	0	0	1.7435e-05	0	0	k__Bacteria;p__Bacteroidota;c__Bacteroidia;o__Bacteroidales;f__Rikenellaceae;g__Alistipes
OTU_539	0	0	3.48699e-05	0	0	0	0	0	0	0	0.00010461	1.7435e-05	0	0	3.48699e-05	0	0	0	0	0	0.00010461	0	0	8.71748e-05	0	0	0	0	0	5.23049e-05	0	1.7435e-05	0	0	0	0	k__Bacteria;p__Actinobacteriota;c__Thermoleophilia;o__Solirubrobacterales;f__Solirubrobacteraceae;g__Patulibacter;s__
OTU_540	0	0	0	0	0	6.97399e-05	0	0	0	0	3.48699e-05	0	0	3.48699e-05	0	0	1.7435e-05	0	0	3.48699e-05	0	0	0	0	0	0	6.97399e-05	0	0	0	0	5.23049e-05	0	0	3.48699e-05	0	k__Bacteria;p__Proteobacteria;c__Gammaproteobacteria;o__Burkholderiales;f__Nitrosomonadaceae;g__MND1;s__
OTU_541	0	1.7435e-05	0	0	6.97399e-05	0.00010461	0	0	0	0	0	6.97399e-05	0	0	0	0	0	3.48699e-05	0	0	0	0	0	3.48699e-05	0	1.7435e-05	0.00020922	0	0	0	0	0	0	0	0	0.00010461	k__Bacteria;p__unidentified_Bacteria;c__Gammaproteobacteria;o__Diplorickettsiales;f__Diplorickettsiaceae;g__;s__
OTU_542	0	0	0	0	3.48699e-05	0	0	0	0	0	0	3.48699e-05	0	0	1.7435e-05	0	0	0	0	0	0	0	0	0	0	3.48699e-05	1.7435e-05	0	0	0	0	6.97399e-05	0	0	0	0.000156915	k__Bacteria;p__unidentified_Bacteria;c__Alphaproteobacteria;o__Elsterales;f__;g__;s__
OTU_543	0	0	0	0	0	0	0	0	0	0	0	0	0	0	0	0	3.48699e-05	0	0	0.00010461	3.48699e-05	0	0	0	0	0	0	0	0	5.23049e-05	0	3.48699e-05	0	0	0	6.97399e-05	k__Bacteria
OTU_544	0	0	0	0	0	0	0	0.00013948	0.000156915	0	0	0	0	0	0	0	0	0	5.23049e-05	0	0	0	0	0	0	0	0	0	0	0	0	0	0	0	0	0	k__Bacteria;p__Firmicutes;c__Clostridia;o__Peptostreptococcales-Tissierellales;f__Anaerovoracaceae;g__Family_XIII_AD3011_group;s__
OTU_545	0	8.71748e-05	0	0	3.48699e-05	1.7435e-05	0	0	0	0	0	0	0	0.00010461	0	0	0	0	0	0	0	0	0	0	0	3.48699e-05	5.23049e-05	0	0	0	0	0	5.23049e-05	0	0	0	k__Bacteria;p__unidentified_Bacteria;c__Polyangia;o__Polyangiales;f__Sandaracinaceae;g__;s__
OTU_546	6.97399e-05	3.48699e-05	0	0.000296394	1.7435e-05	3.48699e-05	1.7435e-05	3.48699e-05	0	6.97399e-05	5.23049e-05	0	0	0.00010461	8.71748e-05	1.7435e-05	1.7435e-05	5.23049e-05	1.7435e-05	0	8.71748e-05	0.00017435	0	0.00013948	1.7435e-05	0.000122045	0.000156915	8.71748e-05	0.000156915	0.00010461	6.97399e-05	0	5.23049e-05	1.7435e-05	8.71748e-05	3.48699e-05	k__Bacteria;p__Proteobacteria;c__Gammaproteobacteria;o__Enterobacterales;f__Enterobacteriaceae
OTU_547	0	0	0	0	0	0	0	0	0	0	0	0	0	0	0	0	0.00010461	0	0	1.7435e-05	0	0	0	1.7435e-05	0	0	0	0	0	0	0	0.000366134	0	0	0	0	k__Bacteria;p__Bacteroidota;c__Bacteroidia;o__Chitinophagales;f__Chitinophagaceae;g__Taibaiella;s__
OTU_548	0	0	0	0	0	6.97399e-05	0	0	0	0	0	0	0	0	0	0	0	0	0	0	0	0	0.000645094	0	0	0	0	0	0	0	0	0	0.000784574	0	0	0	k__Bacteria;p__Acidobacteriota;c__Holophagae;o__Subgroup_7;f__;g__;s__
OTU_549	0	0	0	3.48699e-05	0	0	1.7435e-05	0	0	3.48699e-05	0	0	0	0	0	0	0	0	0	0	0	0	0	0	0.000191785	0	0	5.23049e-05	0	0	3.48699e-05	0	0	6.97399e-05	0	0	k__Bacteria;p__Proteobacteria;c__Gammaproteobacteria;o__Xanthomonadales;f__Rhodanobacteraceae;g__Dokdonella;s__
OTU_550	0.0240428	6.97399e-05	0.00013948	0.0398738	8.71748e-05	0.000313829	0.0360032	1.7435e-05	0	0.0233803	0.000784574	0.000383569	1.7435e-05	5.23049e-05	0.00013948	0.000540484	0.000749704	0.00020922	5.23049e-05	3.48699e-05	0.00010461	3.48699e-05	0.00020922	8.71748e-05	0.0141572	0.00010461	0.000226655	0.00245833	3.48699e-05	3.48699e-05	0.00240603	3.48699e-05	6.97399e-05	0.00207476	0.000557919	0.00017435	k__Bacteria;p__Proteobacteria;c__Gammaproteobacteria;o__Enterobacterales;f__Enterobacteriaceae;g__Escherichia-Shigella
OTU_551	0	0	0	0	0	0	0	0.000401004	0.00013948	0	0	0	0	0	0	0	0	0	0	0	0	0	0	0	0	0	0	0	0	0	0	0	0	0	0	0	k__Bacteria;p__Bacteroidota;c__Bacteroidia;o__Bacteroidales;f__Muribaculaceae;g__;s__
OTU_552	0	0	0	0.00010461	0	0	0	0.00122045	8.71748e-05	0	0	0	1.7435e-05	0	0	0	0.000191785	0	1.7435e-05	0	0	0	0	1.7435e-05	5.23049e-05	0	0	0	0	0	3.48699e-05	8.71748e-05	0	0	0	0	k__Bacteria
OTU_553	0	0	3.48699e-05	0	0	0	0	0	0	8.71748e-05	0	0.000191785	0	3.48699e-05	6.97399e-05	0	6.97399e-05	0	0	3.48699e-05	3.48699e-05	0	3.48699e-05	0	6.97399e-05	0	0	5.23049e-05	0	0	0.00024409	5.23049e-05	1.7435e-05	0.000627659	1.7435e-05	0.00020922	k__Bacteria;p__Proteobacteria;c__Gammaproteobacteria;o__Burkholderiales;f__Comamonadaceae;g__Rubrivivax;s__
OTU_554	0	0	0	0	0	0	6.97399e-05	5.23049e-05	3.48699e-05	0	0	0	0	0	0	0	0	0	0	8.71748e-05	0	0	0	0	0	0	0	0	0	0	0	0	0	0	0	0	Unknown
OTU_555	1.7435e-05	0	0	0	0	0	0	0	0	0	0	0	0	0.00010461	0	0	0	0	0	0	0	0	0	0	5.23049e-05	0	0	1.7435e-05	0	0	0	0	0	0	0	0	k__Bacteria
OTU_556	0	0	0	0	1.7435e-05	3.48699e-05	0	0	0	0	5.23049e-05	1.7435e-05	0	0	0	0	0	0.000383569	0	0	0	0	0	8.71748e-05	0	1.7435e-05	0	0	3.48699e-05	1.7435e-05	0	5.23049e-05	0	0	8.71748e-05	0	k__Bacteria
OTU_557	0.000592789	0.00125532	0.0013948	0.000732269	0.0010984	0.00160402	0.00155171	0.000470744	0.000435874	0.00183067	0.000714834	0.000278959	0.00024409	6.97399e-05	0.00017435	6.97399e-05	0.0017435	0.00409722	0	0.000313829	0.00153428	0	0.000889183	3.48699e-05	0.000889183	0.000296394	0.00020922	0.0103912	0.00941488	0.00931027	0.00406235	0.00322547	0.00479462	0.0017958	0.00320803	0.00148197	k__Bacteria;p__Proteobacteria;c__Gammaproteobacteria;o__Pseudomonadales;f__Pseudomonadaceae;g__Pseudomonas
OTU_558	0	0	0	0	0	1.7435e-05	0	0	0	0	1.7435e-05	0	0	0	0	0	1.7435e-05	0	0	0	0	0	3.48699e-05	0	0	1.7435e-05	3.48699e-05	0	0	0	0	0	5.23049e-05	0	1.7435e-05	3.48699e-05	k__Bacteria;p__Chloroflexi;c__Anaerolineae;o__SBR1031;f__A4b;g__;s__
OTU_559	0	0	0	0	0	0	0	0.000226655	0.000366134	0	0	0	0	0	0	6.97399e-05	3.48699e-05	0	0	0	0	3.48699e-05	0	0	0	0	0	0	0	0	0	0	0	0	6.97399e-05	0	k__Bacteria;p__unidentified_Bacteria;c__Clostridia;o__Oscillospirales;f__Oscillospiraceae;g__;s__
OTU_560	0	0	0	0	0	0	0	0.00013948	1.7435e-05	0	0	0	0	0	0	0	0	0	0	0	0	0	0	0	0	0	0	1.7435e-05	0	0	0	0	0	0	0	0	k__Bacteria
OTU_561	0	0	0	0	0	0	0	0	3.48699e-05	0	0	0	0.000488179	0	0	0	0	0	0	0	0	0	0	0	0	0	0	0	0	0	0	0	0	0	0	0	k__Bacteria;p__Proteobacteria;c__Gammaproteobacteria;o__Burkholderiales;f__Nitrosomonadaceae;g__MND1;s__
OTU_562	0	0	0	0	0	0	0	0	0	0	0	0	0	0	0	0	1.7435e-05	0	0	1.7435e-05	0	0	0	0	0	0	0	0	0	1.7435e-05	0	0.00017435	0	0	0	1.7435e-05	k__Bacteria;p__Armatimonadota;c__Chthonomonadetes;o__Chthonomonadales;f__Chthonomonadaceae;g__Chthonomonas;s__
OTU_563	0	0	0	0	0	0	0	0.000261525	6.97399e-05	0	5.23049e-05	0	0	0	0	0.00010461	0.00013948	0	6.97399e-05	1.7435e-05	0	3.48699e-05	0	0	0	0	0	0	0	0	0	0	0	0	8.71748e-05	0	k__Bacteria;p__Actinobacteriota;c__Actinobacteria;o__Bifidobacteriales;f__Bifidobacteriaceae;g__Bifidobacterium;s__Bifidobacterium_pseudolongum
OTU_564	0	0	8.71748e-05	0	0	0	0	0	0	0	5.23049e-05	1.7435e-05	0	0	0	0	0	1.7435e-05	0	0	0	0	0	0	0	3.48699e-05	0	0	0	0	0	0	0	0	8.71748e-05	5.23049e-05	k__Bacteria;p__unidentified_Bacteria;c__Vicinamibacteria;o__Vicinamibacterales
OTU_565	0	0	0	0	0	3.48699e-05	0	0	0	0	0	0	0	3.48699e-05	3.48699e-05	0	6.97399e-05	0.00020922	0	3.48699e-05	0	0	0	0	0	0	0	0	5.23049e-05	0	0	0.000993793	0	0	0	0	k__Bacteria;p__Proteobacteria;c__Gammaproteobacteria;o__Salinisphaerales;f__Solimonadaceae;g__Alkanibacter
OTU_566	0	0	0	0	0	0	5.23049e-05	0.000226655	0	0	0	0	0	0	0	0	0	0	0	0	0	0	0	0	0	0	0	1.7435e-05	0	0	0	0.000191785	0	0	0	0	k__Bacteria
OTU_567	0	0	0	0	0	0	0	0	0	0	8.71748e-05	1.7435e-05	1.7435e-05	0	0	0	0	5.23049e-05	0	0	0	0	0	0	0	0	0	0	0	0	0	0	0	0	8.71748e-05	0	k__Bacteria;p__Proteobacteria;c__Alphaproteobacteria;o__Caulobacterales;f__Hyphomonadaceae;g__SWB02;s__
OTU_568	0	6.97399e-05	0	0	0	0	0	0	0	0	3.48699e-05	0	0	0.00013948	0	0	0	0	0	0	0	0	5.23049e-05	0	0	0	0	5.23049e-05	0	0	0	0	8.71748e-05	0	6.97399e-05	0	k__Bacteria;p__unidentified_Bacteria;c__Anaerolineae;o__Caldilineales;f__Caldilineaceae;g__;s__
OTU_569	1.7435e-05	0	0	5.23049e-05	0	0	3.48699e-05	0.0014471	0	0	0	0	1.7435e-05	0	0	0	0.00017435	1.7435e-05	0	5.23049e-05	0	0	0	1.7435e-05	1.7435e-05	0	0	0	0	0	3.48699e-05	0.00010461	0	0	0	0	k__Bacteria
OTU_570	0	0	0	0	0	0	0	0.000296394	0.000156915	0	0	0	0	0	0	0	0	0	0	0	0	0	0	0	0	0	0	0	0	0	0	0	0	0	0	0	k__Bacteria;p__Bacteroidota;c__Bacteroidia;o__Bacteroidales;f__Muribaculaceae;g__;s__
OTU_571	5.23049e-05	8.71748e-05	5.23049e-05	8.71748e-05	3.48699e-05	5.23049e-05	0	0	3.48699e-05	3.48699e-05	8.71748e-05	8.71748e-05	8.71748e-05	0.00020922	0.00010461	0	8.71748e-05	0	3.48699e-05	1.7435e-05	6.97399e-05	1.7435e-05	8.71748e-05	5.23049e-05	1.7435e-05	3.48699e-05	0.00010461	0.00010461	0.00013948	8.71748e-05	0.000191785	0.00010461	6.97399e-05	8.71748e-05	0.000156915	0.000191785	k__Bacteria;p__Proteobacteria;c__Gammaproteobacteria;o__Enterobacterales;f__Enterobacteriaceae
OTU_572	1.7435e-05	0	0	5.23049e-05	0	0	0.00024409	0	0	1.7435e-05	0	0	0	0	0	0	0	0	0	0	0	0	0	0	1.7435e-05	0	0	0	0	0	0	0	0	6.97399e-05	0	0	k__Bacteria;p__Firmicutes;c__Clostridia;o__Oscillospirales;f__Oscillospiraceae;g__UCG-002;s__
OTU_573	0	0	0	0	0	0	0	0	0	0	0	0	0	0	0	0	0	0	0	0	0	0	0	0	0.000278959	0	0	0	0	0	0	0	0	0	0	0	k__Bacteria
OTU_574	0	0	5.23049e-05	0	6.97399e-05	0	0	0	0	0	0	0	0	0	1.7435e-05	0	3.48699e-05	1.7435e-05	0	5.23049e-05	1.7435e-05	0	0	0	0	5.23049e-05	3.48699e-05	0	0	0	0	0	0	0	0	3.48699e-05	k__Bacteria;p__unidentified_Bacteria;c__Verrucomicrobiae;o__Verrucomicrobiales;f__Verrucomicrobiaceae;g__;s__
OTU_575	1.7435e-05	0	8.71748e-05	0	0	0	0	0	0	0	5.23049e-05	5.23049e-05	3.48699e-05	0	0.00010461	0	0.000226655	8.71748e-05	0	0	3.48699e-05	0	0	1.7435e-05	0.000122045	0	0	0.00010461	0	1.7435e-05	0.000122045	0	1.7435e-05	3.48699e-05	0.00013948	6.97399e-05	k__Bacteria;p__Proteobacteria;c__Gammaproteobacteria;o__Burkholderiales;f__Comamonadaceae;g__Hydrogenophaga
OTU_576	0	0	0	0	0	0	0	8.71748e-05	0.000191785	0	0	0	0	0	0	0	0	0	0	0	0	0	0	0	0	0	0	0	0	0	0	0	0	0	0	0	k__Bacteria;p__Firmicutes;c__Clostridia;o__Lachnospirales;f__Lachnospiraceae;g__Lachnospiraceae_NK4A136_group;s__
OTU_577	5.23049e-05	0.00010461	0	0.000122045	5.23049e-05	1.7435e-05	1.7435e-05	0	0	0	0	0	0	3.48699e-05	0	0	0	3.48699e-05	0.00013948	3.48699e-05	0	0.000261525	6.97399e-05	8.71748e-05	1.7435e-05	0	3.48699e-05	0.00010461	3.48699e-05	3.48699e-05	0.00020922	8.71748e-05	0.000226655	0.000122045	0	6.97399e-05	k__Bacteria;p__Proteobacteria;c__Gammaproteobacteria;o__Enterobacterales;f__Enterobacteriaceae
OTU_578	0	0	0	0	1.7435e-05	0	0	0	0	0	0	0	0	0	0	0	0	0.00024409	0	0	3.48699e-05	0	0	1.7435e-05	0	3.48699e-05	3.48699e-05	0	0	0	0	0	0	0	0	5.23049e-05	k__Bacteria;p__Verrucomicrobiota;c__Verrucomicrobiae;o__Verrucomicrobiales;f__Rubritaleaceae;g__Luteolibacter;s__
OTU_579	0	0	0	0	0	0	0	0	0	0	0	0	0	0	0	0	1.7435e-05	0	0	0	0	0	0	0	0	0	0	0	0	0	0	0.000278959	0	0	0	0	k__Bacteria;p__Abditibacteriota;c__Abditibacteria;o__Abditibacteriales;f__Abditibacteriaceae;g__Abditibacterium;s__bacterium_LY17
OTU_580	0	0	0	0	0	0	1.7435e-05	0	0	0	0	0	0	0	0	0	8.71748e-05	0	0	0.000191785	0	0	0	3.48699e-05	0	0	0	0	0	0	0	0	0	0	0	0	k__Bacteria;p__Proteobacteria;c__Alphaproteobacteria;o__Rickettsiales;f__Mitochondria
OTU_581	0	0	0	0	0	0	0.00010461	0	8.71748e-05	0	0	0	0	0	0	0	0	0	0	0	0	0	0	0	0	0	0	0	0	0	0	0	0	0	0	0	k__Bacteria
OTU_582	0	8.71748e-05	0	0	0	1.7435e-05	0	0	0	0	0	0	0.00024409	3.48699e-05	0	0	0.000122045	5.23049e-05	0	0	0	0	0	0	0	0	0	0	0	0	0	0	0	0	0	0	k__Bacteria;p__Proteobacteria;c__Gammaproteobacteria;o__Xanthomonadales;f__Xanthomonadaceae;g__Arenimonas;s__Arenimonas_donghaensis
OTU_583	0	0.000261525	3.48699e-05	0	0	1.7435e-05	0	0	0	0	0	0	0	0.000226655	3.48699e-05	0	1.7435e-05	0	0	0	0	0	6.97399e-05	5.23049e-05	0	1.7435e-05	0	0	0	0	0	0	0.00013948	0	0	0	k__Bacteria;p__Gemmatimonadetes;c__unidentified_Gemmatimonadetes;o__Gemmatimonadales;f__Gemmatimonadaceae;g__Gemmatimonas;s__
OTU_584	0	0	0	0	0	0	0	0.000191785	5.23049e-05	0	0	0	0	0	0	0	0	0	0	0	0	0	0	0	0	0	0	0	0	0	0	0	0	0	0	0	k__Bacteria
OTU_585	0	0	0	0	0	0	0	0	0	0	0	0	0	0	0	0	0	0	0	0	0	0	0	0	0	0	0	0	0	0	0	0	0	0.00024409	0	0	Unknown
OTU_586	0	1.7435e-05	0	0	1.7435e-05	6.97399e-05	0	0	0	0	0	1.7435e-05	0	0	1.7435e-05	0	0	0	0	1.7435e-05	0	3.48699e-05	0	1.7435e-05	0	0.000470744	6.97399e-05	0	0	0.000122045	0	0	0	0	0	0	k__Bacteria;p__Firmicutes;c__Negativicutes;o__Veillonellales-Selenomonadales;f__Veillonellaceae;g__Veillonella;s__Veillonella_parvula
OTU_587	0	0	0.000191785	0	0	0	0	0	0	0	1.7435e-05	8.71748e-05	0	0	0.000331264	0	0.000122045	0.000156915	0	6.97399e-05	1.7435e-05	0	3.48699e-05	0	0	0	0	3.48699e-05	0	0	1.7435e-05	0.000645094	0	0	0	6.97399e-05	k__Bacteria;p__Proteobacteria;c__Gammaproteobacteria;o__Burkholderiales;f__Comamonadaceae;g__Pseudorhodoferax;s__
OTU_588	3.48699e-05	0	0	5.23049e-05	0	0	0	0	0	1.7435e-05	0	0	0	0	0	0	0	0	0	0	0	0	0	0	0.000156915	0	0	0	0	0	1.7435e-05	0	0	0.000122045	0	1.7435e-05	k__Bacteria;p__Nitrospirota;c__Nitrospira;o__Nitrospirales;f__Nitrospiraceae;g__unidentified_Nitrospiraceae;s__Nitrospira_sp
OTU_589	0	5.23049e-05	0	0	1.7435e-05	6.97399e-05	0	0	0	0	3.48699e-05	0	0	0	0	0	0	0	0	0	0	0	0	0	1.7435e-05	0	0	0	0	0	1.7435e-05	3.48699e-05	0	0	5.23049e-05	0	k__Bacteria;p__Firmicutes;c__Clostridia;o__Clostridiales;f__Clostridiaceae;g__Clostridium_sensu_stricto_13;s__Clostridium_estertheticum
OTU_590	0	0	0	0	0	0	0	0	0	0	0	0	0	0	0	0	0	0	0	0	0.000401004	0	0	0	0	0	0	0	0	0	0	0	0	0	0	0	k__Bacteria;p__Actinobacteriota;c__Actinobacteria;o__Actinomycetales;f__Actinomycetaceae;g__Actinomyces;s__Actinomyces_dentalis
OTU_591	0	0	0	0	0	0	0	0.000488179	6.97399e-05	0	0	0	0	0	0	0	0	0	0	0	0	0	0	0	0	0	0	0	0	0	0	0	0	0	0	0	k__Bacteria;p__Bacteroidota;c__Bacteroidia;o__Bacteroidales;f__Muribaculaceae;g__;s__
OTU_592	0	0	0	0	0	0	6.97399e-05	0.000331264	3.48699e-05	0	0	0	0	0	0	0	0	0	0	0	0	0	0	0	5.23049e-05	0	0	0	0	0	0	0	0	0	0	0	k__Bacteria;p__Firmicutes;c__Clostridia;o__Monoglobales;f__Monoglobaceae;g__Monoglobus;s__
OTU_593	0	0.000296394	0.00010461	0	3.48699e-05	3.48699e-05	0	0	0	0	3.48699e-05	3.48699e-05	1.7435e-05	0.00017435	0	0	5.23049e-05	5.23049e-05	0	1.7435e-05	0	0	0.00017435	5.23049e-05	0	0	0.00010461	3.48699e-05	1.7435e-05	0	0	5.23049e-05	0.00017435	0	0.00010461	5.23049e-05	k__Bacteria;p__Proteobacteria;c__Gammaproteobacteria;o__Burkholderiales;f__Comamonadaceae;g__Caenimonas;s__
OTU_594	0	0	3.48699e-05	0	1.7435e-05	3.48699e-05	0	0	0	0	0	1.7435e-05	0	0	0	0	6.97399e-05	3.48699e-05	0	0.000191785	0	0	0	0	0	0	0.000122045	0	0	0	0	5.23049e-05	0	0	0	3.48699e-05	k__Bacteria;p__unidentified_Bacteria;c__Verrucomicrobiae;o__Verrucomicrobiales;f__Verrucomicrobiaceae;g__;s__
OTU_595	0	0	0	0	0	0	0	0.00017435	0.000348699	0	0	0	0	0	0	0	0	0	0	0	0	0	0	0	0	0	0	0	0	0	0	0	0	0	3.48699e-05	0	k__Bacteria;p__unidentified_Bacteria;c__Clostridia;o__Oscillospirales;f__Ruminococcaceae;g__;s__
OTU_596	0	0	0	0	0	0	0	0.000366134	0.00017435	0	0	0	0	0	0	0	0	0	1.7435e-05	3.48699e-05	0	0	0	0	0	0	0	0	0	0	0	0	0	0	0	0	k__Bacteria;p__unidentified_Bacteria;c__Clostridia;o__Lachnospirales;f__Lachnospiraceae;g__;s__
OTU_597	3.48699e-05	0	0	3.48699e-05	0	0	0	0	0	0	0	0	0	0	0	0	0	0	0	0	0	0	0	0	0.00010461	0	0	0.00020922	0	0	5.23049e-05	0	0	5.23049e-05	0	0	k__Bacteria
OTU_598	0	5.23049e-05	0.00010461	0	0	5.23049e-05	0	0	0	0	1.7435e-05	0.000122045	0	5.23049e-05	6.97399e-05	0	3.48699e-05	0	0	3.48699e-05	0	0	0	0	0	0	5.23049e-05	0	0	0	0	1.7435e-05	0	0	6.97399e-05	3.48699e-05	k__Bacteria;p__Actinobacteriota;c__Actinobacteria;o__Micrococcales;f__Microbacteriaceae;g__Gryllotalpicola
OTU_599	0	0	0	0	0	0	0	0	3.48699e-05	0	0	0	0	0	0	0	0	0	0	0	0	0	0	0	0	0	0	0	0	0	0	0	0	0.00013948	0	0	k__Bacteria
OTU_600	0	0	0	0	0	0	0	1.7435e-05	3.48699e-05	5.23049e-05	0	0	0	0	0	0	0	0	3.48699e-05	0	0	0	0	0	3.48699e-05	0	0	0	0	0	1.7435e-05	0	0	0	0	0	k__Bacteria;p__Verrucomicrobiota;c__Verrucomicrobiae;o__Verrucomicrobiales;f__Akkermansiaceae;g__Akkermansia;s__Akkermansia_muciniphila
OTU_601	0	0	0	0	0	0	0	0	0	0	1.7435e-05	0	0	0	0	3.48699e-05	8.71748e-05	0	0	0	0	0	0	0	0	0	0	0	0	0	0	0	0	0	0.00013948	0	k__Bacteria;p__Bacteroidota;c__Bacteroidia;o__Bacteroidales;f__Muribaculaceae;g__;s__
OTU_602	0	1.7435e-05	0	0	0	1.7435e-05	0	0	0	0	0	0	0	3.48699e-05	0	0	0	0	0	1.7435e-05	0	0	1.7435e-05	0	0	0	1.7435e-05	0	0	0	0	0	0	0	6.97399e-05	0	k__Bacteria;p__Bacteroidota;c__Bacteroidia;o__Sphingobacteriales;f__Sphingobacteriaceae;g__Mucilaginibacter
OTU_603	0	0	3.48699e-05	0	0	0	0	0	0	0	5.23049e-05	1.7435e-05	0	0	0	0	3.48699e-05	0	0	3.48699e-05	1.7435e-05	0	0	0.000122045	0	0	0	0	0	0	0	1.7435e-05	0	0	0	0	k__Bacteria;p__Proteobacteria;c__Alphaproteobacteria;o__Micropepsales;f__Micropepsaceae;g__Micropepsis;s__
OTU_604	0	0	0	0	3.48699e-05	1.7435e-05	0	0	0	0	8.71748e-05	0	0	0	0	0	0	0	0	5.23049e-05	0	0	0	0	0	1.7435e-05	0	0	1.7435e-05	0	0	5.23049e-05	0	0	3.48699e-05	6.97399e-05	k__Bacteria;p__unidentified_Bacteria;c__Alphaproteobacteria;o__Elsterales;f__;g__;s__
OTU_605	0	1.7435e-05	0	0	0	0	0	0	0	0	5.23049e-05	0	0	0	0	0	0.00010461	0	0	5.23049e-05	0	0	0.00024409	0	0	0	0	0	0	0	0	6.97399e-05	0.000191785	0	0	0	k__Bacteria
OTU_606	0	3.48699e-05	6.97399e-05	0	0	0	5.23049e-05	0	0	0	0	0	0	0	0	0	0	0	0	0	0	0	0	0	3.48699e-05	0	0	1.7435e-05	0	3.48699e-05	1.7435e-05	0	0	5.23049e-05	0	3.48699e-05	k__Bacteria;p__Actinobacteriota;c__Actinobacteria;o__Bifidobacteriales;f__Bifidobacteriaceae;g__Bifidobacterium;s__Bifidobacterium_adolescentis
OTU_607	0.0286108	0.0112456	0.00958923	0.00345212	0.00625915	0.00650324	0.00322547	0.00219681	0.00263268	0.0172955	0.0117163	0.00188298	0.00298138	0.00306855	0.0028419	0.000662529	0.00453309	0.00231885	0.0157786	0.0542053	0.0103215	0.00123788	0.00326034	0.00176093	0.00298138	0.00221424	0.00217937	0.00216194	0.000401004	0.00427157	0.00439361	0.00287677	0.00491666	0.00219681	0.00594532	0.00301625	k__Bacteria;p__Firmicutes;c__Bacilli;o__Lactobacillales;f__Enterococcaceae;g__Enterococcus
OTU_608	0	0	0	0	0	3.48699e-05	0	0	0	0	6.97399e-05	3.48699e-05	0	0	0	0	0	0	0	0	0	0	0	0	0	0	1.7435e-05	0	0	0	0	0	0	0	3.48699e-05	1.7435e-05	k__Bacteria;p__Proteobacteria;c__Alphaproteobacteria;o__Dongiales;f__Dongiaceae;g__Dongia;s__
OTU_609	5.23049e-05	3.48699e-05	3.48699e-05	0.00013948	3.48699e-05	3.48699e-05	8.71748e-05	1.7435e-05	0	0.000749704	8.71748e-05	0	0	0	0	0	8.71748e-05	1.7435e-05	0	3.48699e-05	8.71748e-05	3.48699e-05	5.23049e-05	1.7435e-05	0.00010461	0	0	0.000488179	0.000226655	0.00020922	0.00167376	0.000592789	0.00010461	0.00383569	0.00013948	0.000470744	k__Bacteria;p__Bacteroidota;c__Bacteroidia;o__Sphingobacteriales;f__Sphingobacteriaceae;g__Sphingobacterium;s__Sphingobacterium_sp_G1-14
OTU_610	0	0	0	0	0	0	0	0.00010461	8.71748e-05	0	0	0	1.7435e-05	0	0	0	0	0	1.7435e-05	0	0	0	0	0	0	0	0	0	0	0	0	0	0	0	0	0	k__Bacteria;p__Firmicutes;c__Clostridia;o__Lachnospirales;f__Lachnospiraceae;g__GCA-900066575;s__
OTU_611	0	0.000191785	3.48699e-05	0	1.7435e-05	0.000122045	0	0	0	0	0.00024409	0.000331264	0	8.71748e-05	0.00010461	0	5.23049e-05	0.000191785	0	6.97399e-05	1.7435e-05	0	0	5.23049e-05	0	0.00013948	0.00017435	0	3.48699e-05	0	0	5.23049e-05	0	0	0.000226655	0.000156915	k__Bacteria;p__Firmicutes;c__Bacilli;o__Bacillales;f__Bacillaceae;g__Fictibacillus;s__Fictibacillus_barbaricus
OTU_612	0	0	0	0	0	0	0	0.000226655	0	0	0	0	0	0	0	0	0	0	0	0	0	0	0	0	0	0	0	0	0	0	0	0	0	0	0	0	Unknown
OTU_613	0	0	0	0	0	0	6.97399e-05	5.23049e-05	1.7435e-05	0	0	0	0	0	0	0	0	0	3.48699e-05	0	0	0	0.000156915	0	0	0	0	0	0	0	0	0	0	1.7435e-05	0	0	k__Bacteria
OTU_614	0	0	0	0	0	0	0	0	0	0	5.23049e-05	6.97399e-05	0	0	5.23049e-05	0	6.97399e-05	1.7435e-05	0	1.7435e-05	0	0	0	0	0	5.23049e-05	1.7435e-05	0	0	0	0	5.23049e-05	0	0	0	1.7435e-05	k__Bacteria;p__unidentified_Bacteria;c__Bacteroidia;o__Cytophagales;f__Microscillaceae;g__;s__
OTU_615	0	0	0	8.71748e-05	0	0	0	0	0	0	0	0	0	0	0	0	5.23049e-05	0	0	0	0	0	0	0	0	0	0	0	0	0	0	0	0	8.71748e-05	0	0	Unknown
OTU_616	0	0	0	0	0	0	0.000261525	0	0	0	0	0	0	0	0	0	0	0	0	0	0	0	0	0	0	0	0	0	0	0	0	0	0	0	0	0	Unknown
OTU_617	0	0	0	0	1.7435e-05	0	0	0	0	0	5.23049e-05	0	0	0	0	0	0	3.48699e-05	0	0	3.48699e-05	0	3.48699e-05	8.71748e-05	0	0	0	0	0	0	0	0	0	0	8.71748e-05	1.7435e-05	k__Bacteria;p__unidentified_Bacteria;c__unidentified_Bacteria;o__Gemmatimonadales;f__Gemmatimonadaceae;g__;s__
OTU_618	0	0	0	0	6.97399e-05	5.23049e-05	0	0	0	3.48699e-05	1.7435e-05	3.48699e-05	0	3.48699e-05	3.48699e-05	0	5.23049e-05	1.7435e-05	0	5.23049e-05	3.48699e-05	0	0	0	5.23049e-05	0	6.97399e-05	0.00013948	0	0	0	5.23049e-05	0	5.23049e-05	6.97399e-05	6.97399e-05	k__Bacteria;p__Firmicutes;c__Bacilli;o__Bacillales;f__Planococcaceae;g__Lysinibacillus
OTU_619	0	0	0	0	3.48699e-05	3.48699e-05	0	0	0	0	0	1.7435e-05	0	0	0	0	6.97399e-05	3.48699e-05	0	0	1.7435e-05	0	0	5.23049e-05	0	1.7435e-05	3.48699e-05	0	0	1.7435e-05	0	0	0	0	8.71748e-05	0	k__Bacteria;p__Gemmatimonadetes;c__unidentified_Gemmatimonadetes;o__Gemmatimonadales;f__Gemmatimonadaceae;g__Gemmatimonas;s__
OTU_620	0	8.71748e-05	0	0	3.48699e-05	5.23049e-05	0	0	0	0	3.48699e-05	0	0.000156915	5.23049e-05	5.23049e-05	0	0	6.97399e-05	0	0	3.48699e-05	0	6.97399e-05	3.48699e-05	0	1.7435e-05	6.97399e-05	0	0	0	0	6.97399e-05	0	0	5.23049e-05	0	k__Bacteria;p__Proteobacteria;c__Alphaproteobacteria;o__Sphingomonadales;f__Sphingomonadaceae;g__Altererythrobacter;s__
OTU_621	0	0	0	0	1.7435e-05	0	0	0	0	0	0	1.7435e-05	0	1.7435e-05	1.7435e-05	0	0	0	0	5.23049e-05	0	0	0	0	0	3.48699e-05	0	0	0	0	0	0	0	0	0	0	k__Bacteria;p__Proteobacteria;c__Gammaproteobacteria;o__KF-JG30-C25;f__;g__;s__
OTU_622	0	0	0	0	0	0	0	5.23049e-05	3.48699e-05	0	0.00010461	0	0	0	0	0	0	0	0	0	0	0	0	0	0	0	0	0	0	0	0	0	0	0	0.000296394	0	k__Bacteria;p__Bacteroidota;c__Bacteroidia;o__Bacteroidales;f__Bacteroidaceae;g__Bacteroides;s__Bacteroides_sartorii
OTU_623	0	0	0	0	0	0	0	0	0	1.7435e-05	0	0	0	0	0	0	0.000156915	0	0	0	0	0	0	0	0	0	0	0	0	0	0	0	0	0	0	0	k__Bacteria
OTU_624	0	0	0	0	3.48699e-05	0	0	0	0	0	0	0.00013948	0	3.48699e-05	0	0	0	0.000191785	0	1.7435e-05	0	0	0	5.23049e-05	0	5.23049e-05	6.97399e-05	0	0	1.7435e-05	0	0.00017435	0	0	1.7435e-05	0.00013948	k__Bacteria;p__Acidobacteriota;c__Acidobacteriae;o__Solibacterales;f__Solibacteraceae;g__Candidatus_Solibacter;s__
OTU_625	0	0	0	0	0	0	0	0.000226655	0.00024409	0	3.48699e-05	0	0	0	0	0	0	0	1.7435e-05	1.7435e-05	0	0	0	0	0	0	0	0	0	0	0	0	0	0	3.48699e-05	0	k__Bacteria;p__Firmicutes;c__Clostridia;o__Oscillospirales;f__Oscillospiraceae;g__Oscillibacter;s__
OTU_626	0	3.48699e-05	0	0	1.7435e-05	5.23049e-05	0	0	0	0	5.23049e-05	0	0	6.97399e-05	0	0	3.48699e-05	0	0	0	0	0	5.23049e-05	0	0	6.97399e-05	3.48699e-05	0	0	0	0	8.71748e-05	6.97399e-05	0	3.48699e-05	0	k__Bacteria;p__Myxococcota;c__Polyangia;o__Haliangiales;f__Haliangiaceae;g__Haliangium;s__
OTU_627	0	0	0	0	0	0	0	0.00017435	0.000156915	0	0	0	0	0	0	0	0	0	0	0	0	0	0	0	0	0	0	0	0	0	0	0	0	0	0	0	k__Bacteria;p__Firmicutes;c__Clostridia;o__Lachnospirales;f__Lachnospiraceae
OTU_628	0	0	1.7435e-05	0	0	0	0	0	0	0	0	0	0	0	0	0	0	0	0	0	0	0	0	0	0	0	0	0	0	0.000226655	0	0	1.7435e-05	0	0	0	k__Bacteria;p__Firmicutes;c__Clostridia;o__Oscillospirales;f__Ruminococcaceae;g__Ruminococcus
OTU_629	0	0	0	0	0	0	0	0.00013948	0.000122045	0	0	0	0	0	0	0	0	0	5.23049e-05	0	0	0	0	0	0	0	0	0	0	0	0	0	0	0	0	0	k__Bacteria;p__Actinobacteriota;c__Coriobacteriia;o__Coriobacteriales;f__Eggerthellaceae;g__Enterorhabdus;s__
OTU_630	0	0	0	8.71748e-05	0	0	3.48699e-05	5.23049e-05	0	0	0	0	0	0	0	0	0	0	0	0	0	0	0	0	8.71748e-05	0	0	0	0	0	0	0	0	0	0	0	k__Bacteria
OTU_631	0	0	0	0	0	0	0	6.97399e-05	0.00010461	0	0	0	0	0	0	0	0	0	0	1.7435e-05	0	0	0	0	0	0	0	0	0	0	0	0	0	0	0	0	k__Bacteria;p__Firmicutes;c__Clostridia;o__Christensenellales;f__Christensenellaceae;g__Christensenellaceae_R-7_group;s__
OTU_632	0	3.48699e-05	3.48699e-05	0	5.23049e-05	0.000156915	0	0	0	0	0	0	0	0	0	0	0	0	0	0	0	0	0	0	0	0	0	0	0	1.7435e-05	0	0	1.7435e-05	0	5.23049e-05	0	k__Bacteria;p__Firmicutes;c__Clostridia;o__Oscillospirales;f__Ruminococcaceae;g__Ruminococcus;s__Ruminococcus_callidus
OTU_633	0	0	0	0	0	0	0	0	0	0	0	0.00013948	0	0	0	0	0	3.48699e-05	0	0	3.48699e-05	0	0	8.71748e-05	0	0	0	0	0	1.7435e-05	0	0	0	0	0	0	k__Bacteria;p__Gemmatimonadetes;c__unidentified_Gemmatimonadetes;o__Gemmatimonadales;f__Gemmatimonadaceae;g__Gemmatimonas
OTU_634	0	0	0	0	0	0	0	0	0	0	0.00010461	6.97399e-05	0	0	0	0	0	3.48699e-05	0	0	0	0	0	3.48699e-05	0	0	0	0	0	3.48699e-05	0	0.000278959	0	0	0.00013948	1.7435e-05	k__Bacteria;p__Gemmatimonadetes;c__unidentified_Gemmatimonadetes;o__Gemmatimonadales;f__Gemmatimonadaceae;g__Gemmatimonas;s__
OTU_635	0	0	0	0	0	0	0	0	0	0	0.000122045	0	0	0	0	0	1.7435e-05	0	0	6.97399e-05	0	0	0	0	0	0	0	0	0	0	0	0	0	0	0.000122045	0	k__Bacteria;p__Firmicutes;c__Clostridia;o__Oscillospirales;f__Ruminococcaceae;g__Ruminococcus;s__
OTU_636	0	3.48699e-05	0	0	1.7435e-05	0	0	0	0	0	0	0	0	0	0	0	0	0	0	0	0	0	0	8.71748e-05	0	0	0	0	0	0	0	0.000261525	0	0	0	1.7435e-05	k__Bacteria;p__Bacteroidota;c__Bacteroidia;o__Chitinophagales;f__Chitinophagaceae;g__Ferruginibacter;s__
OTU_637	0	0	1.7435e-05	0	0	0	0	0	0	0	3.48699e-05	1.7435e-05	0	5.23049e-05	0	0	0	0	0	6.97399e-05	0	0	0	0	0	1.7435e-05	0	0	0	0	0	0	0	0	8.71748e-05	0	k__Bacteria;p__Acidobacteriota;c__Vicinamibacteria;o__Vicinamibacterales;f__Vicinamibacteraceae;g__;s__
OTU_638	0	0	5.23049e-05	0	3.48699e-05	0	0	0	0	0	0	3.48699e-05	0	0	0	0	0	0	0	6.97399e-05	0	0	0	0	0	3.48699e-05	3.48699e-05	0	0	0	0	0	0	0	1.7435e-05	5.23049e-05	k__Bacteria;p__Proteobacteria;c__Gammaproteobacteria;o__Burkholderiales;f__Alcaligenaceae;g__Bordetella;s__
OTU_639	0	0	0	0	0	0	0	0	0	0	0.00010461	0	0	3.48699e-05	0	0	0	0	0	0	0	0	0	0	0	0	1.7435e-05	0	0	0	0	0	0	0	5.23049e-05	0	k__Bacteria;p__Myxococcota;c__Polyangia;o__Blfdi19;f__;g__;s__
OTU_640	0	0	0	0	0	1.7435e-05	0	0	0	0	5.23049e-05	0	0	0	3.48699e-05	0	5.23049e-05	1.7435e-05	0	0	0	0	0	0	0	0	6.97399e-05	0	3.48699e-05	0	0	0	0	0	0	0	k__Bacteria;p__Acidobacteriota;c__Acidobacteriae;o__unidentified_Acidobacteriae;f__unidentified_Acidobacteriae;g__Paludibaculum;s__
OTU_641	0	0	0	0	0	1.7435e-05	0	0	0	0	8.71748e-05	0	0	0	0	0	3.48699e-05	0	0	1.7435e-05	0	0	0	0	0	0	0	0	0	0	0	0	0	0	6.97399e-05	0	k__Bacteria;p__unidentified_Bacteria;c__Vicinamibacteria;o__Vicinamibacterales
OTU_642	0	0	0	0	0	0	0	0.000226655	0.000348699	0	0	0	0	0	0	0	0	0	0	0	0	0	0	0	0	0	0	0	0	0	0	0	0	0	0	0	k__Bacteria;p__Firmicutes;c__Clostridia;o__Lachnospirales;f__Lachnospiraceae;g__Lachnospiraceae_NK4A136_group;s__
OTU_643	0	5.23049e-05	8.71748e-05	0	5.23049e-05	0.00017435	0	0	0	0	0.000226655	0.000226655	0	8.71748e-05	0.00013948	0	8.71748e-05	0.000191785	0	8.71748e-05	3.48699e-05	3.48699e-05	5.23049e-05	8.71748e-05	8.71748e-05	0.000122045	0.00010461	1.7435e-05	1.7435e-05	6.97399e-05	0	0.000366134	0	3.48699e-05	0.00020922	0.000226655	k__Bacteria;p__Proteobacteria;c__Alphaproteobacteria;o__Rhizobiales;f__Xanthobacteraceae;g__Pseudolabrys;s__
OTU_644	0	0	0	0	0	0	0	0	0	0	6.97399e-05	0	0	0	0	0	0	0.000156915	0	0	0	0	0	0	0	0	0	0	0	0	0	0.00010461	0	0	1.7435e-05	0	k__Bacteria;p__Proteobacteria;c__Gammaproteobacteria;o__Burkholderiales;f__Methylophilaceae;g__Methylobacillus;s__
OTU_645	0	3.48699e-05	5.23049e-05	0	0	0	0	0	0	3.48699e-05	0	5.23049e-05	0	0	6.97399e-05	0	3.48699e-05	0	0	3.48699e-05	1.7435e-05	0	0	0	6.97399e-05	0	3.48699e-05	5.23049e-05	0	0	1.7435e-05	1.7435e-05	0	1.7435e-05	3.48699e-05	1.7435e-05	k__Bacteria;p__unidentified_Bacteria;c__Acidimicrobiia;o__Microtrichales;f__Microtrichaceae;g__;s__
OTU_646	0	0	0	0	0	1.7435e-05	0	0	0	0	0	5.23049e-05	0	0	1.7435e-05	0	0	0	0	0	0	0	0	0	0	1.7435e-05	0	0	0	0	0	6.97399e-05	0	0	3.48699e-05	0	k__Bacteria;p__Actinobacteriota;c__Actinobacteria;o__Corynebacteriales;f__Nocardiaceae;g__Nocardia
OTU_647	0	0	0.00017435	0	0	0	0	0	0	0	0	0	0	6.97399e-05	5.23049e-05	0	0	0	0	0	5.23049e-05	0	0.00010461	0	0	0	3.48699e-05	0	0	0	0	5.23049e-05	8.71748e-05	0	1.7435e-05	0	k__Bacteria;p__Actinobacteriota;c__Actinobacteria;o__Propionibacteriales;f__Nocardioidaceae;g__Nocardioides;s__Nocardioides_sp
OTU_648	0	0	6.97399e-05	0	0	0	0	0	0	1.7435e-05	0	0	0	0	6.97399e-05	0	5.23049e-05	0	0	0	0	0	0	0	0.000191785	0	0	1.7435e-05	0	0	0.00010461	1.7435e-05	8.71748e-05	0	0	0	k__Bacteria;p__Myxococcota;c__Polyangia;o__Nannocystales;f__Nannocystaceae;g__Nannocystis;s__
OTU_649	0	0	0	0	1.7435e-05	6.97399e-05	0	0	0	0	3.48699e-05	5.23049e-05	0	0	0	0	0	0.000122045	0	0	0	0	3.48699e-05	0	0	0	5.23049e-05	0	0	0	0	1.7435e-05	3.48699e-05	3.48699e-05	3.48699e-05	3.48699e-05	k__Bacteria;p__Proteobacteria;c__Alphaproteobacteria;o__Acetobacterales;f__Acetobacteraceae;g__Rhodovastum;s__
OTU_650	0	5.23049e-05	1.7435e-05	0	8.71748e-05	0.00017435	0	0	0	0	8.71748e-05	0.00017435	0	8.71748e-05	5.23049e-05	0	0	0	0	6.97399e-05	0	0	0	0	0	5.23049e-05	6.97399e-05	0	0	1.7435e-05	0	1.7435e-05	0	0	3.48699e-05	0.000122045	k__Bacteria;p__Acidobacteriota;c__Acidobacteriae;o__Acidobacteriales;f__Acidobacteriaceae_(Subgroup_1);g__Edaphobacter;s__
OTU_651	0	0	0	0	0	6.97399e-05	0	0	0	0	0	0.000122045	0	0	0	0	0	0	0	0	0	0	0	0	0	0	3.48699e-05	0	0	0	0	0	0	0	0	0	k__Bacteria;p__Gemmatimonadetes;c__unidentified_Gemmatimonadetes;o__Gemmatimonadales;f__Gemmatimonadaceae;g__Gemmatimonas;s__
OTU_652	0	0.00010461	0	0	0	1.7435e-05	0	0	0	0	0	1.7435e-05	0	0.00013948	0	0	1.7435e-05	0	0	0	0	0	0	0	0	0	0	0	0	0	0	0	3.48699e-05	0	0	0	k__Bacteria;p__Gemmatimonadetes;c__unidentified_Gemmatimonadetes;o__Gemmatimonadales;f__Gemmatimonadaceae;g__Gemmatimonas;s__
OTU_653	0	1.7435e-05	5.23049e-05	0	0	0	0	0	0	0	0	3.48699e-05	0	0	0.00017435	0	5.23049e-05	0	0	0	0	0	0	1.7435e-05	0	0	0	0	0	1.7435e-05	0	0	0	0	0	3.48699e-05	k__Bacteria;p__Proteobacteria;c__Gammaproteobacteria
OTU_654	0	5.23049e-05	6.97399e-05	1.7435e-05	0.000122045	3.48699e-05	0	0	0	3.48699e-05	0	5.23049e-05	0	3.48699e-05	0.000156915	0	6.97399e-05	5.23049e-05	0	6.97399e-05	5.23049e-05	0	0	8.71748e-05	3.48699e-05	0.000156915	1.7435e-05	3.48699e-05	1.7435e-05	0	6.97399e-05	5.23049e-05	0	3.48699e-05	6.97399e-05	0.00010461	k__Bacteria
OTU_655	0	0	0	0	0	0	0	0	0	0	3.48699e-05	0	0	0	0	0	6.97399e-05	0	0	6.97399e-05	0	0	0	0	0	0	0	0	0	0	0	0	0	0	8.71748e-05	0	k__Bacteria;p__Firmicutes;c__Negativicutes;o__Veillonellales-Selenomonadales;f__Selenomonadaceae;g__Quinella;s__
OTU_656	0	0	0	0	0	0	0	0.000296394	0.000191785	0	0	0	0	0	0	0	0	0	0	0	0	0	0	0	0	0	0	0	0	0	0	0	0	0	0	0	k__Bacteria;p__Bacteroidota;c__Bacteroidia;o__Bacteroidales;f__Muribaculaceae;g__;s__
OTU_657	0	1.7435e-05	0	0	5.23049e-05	1.7435e-05	0	0	0	0	0	0	0	5.23049e-05	0	0	1.7435e-05	0	0	0	0	0	8.71748e-05	0	0	6.97399e-05	5.23049e-05	5.23049e-05	0	6.97399e-05	0	1.7435e-05	5.23049e-05	0	0	1.7435e-05	k__Bacteria;p__Chloroflexi;c__Chloroflexia;o__Thermomicrobiales;f__JG30-KF-CM45;g__;s__
OTU_658	0	8.71748e-05	3.48699e-05	0	0	0	0	0	0	0	0	1.7435e-05	0	0.00013948	1.7435e-05	0	0	0	0	0	0	0	1.7435e-05	0	5.23049e-05	0	0	0	0	0	0	0	3.48699e-05	0	0	0	k__Bacteria;p__Cyanobacteria;c__Sericytochromatia;o__;f__;g__;s__
OTU_659	0	0	1.7435e-05	0	0	0	0	0	0	0	0	0	0	0	6.97399e-05	0	3.48699e-05	0	0	0	0	0	0	1.7435e-05	0	0	0	0	0	3.48699e-05	0	0	0	0	0	1.7435e-05	k__Bacteria;p__Bdellovibrionota;c__Oligoflexia;o__Oligoflexales;f__unidentified_Oligoflexales;g__Oligoflexus;s__
OTU_660	0	0	0	0	0	0	0	0.000366134	0.000191785	0	0	0	0	0	0	0	0	0	0	0	0	0	0	0	0	0	0	0	0	0	0	0	0	0	3.48699e-05	0	k__Bacteria;p__Firmicutes;c__Clostridia;o__Clostridia_UCG-014;f__;g__;s__
OTU_661	0	0	0	0	0	0	0	0.000191785	0.00010461	0	0	0	0	0	0	3.48699e-05	0	0	1.7435e-05	0	0	0	0	0	0	0	0	0	0	0	0	0	0	0	0	0	k__Bacteria;p__Firmicutes;c__Clostridia;o__Lachnospirales;f__Lachnospiraceae;g__Roseburia;s__
OTU_662	0	0	0	0	0	0	0	0.00013948	5.23049e-05	0	0	0	0	0	0	0	0	0	0	0	0	0	0	0	0	0	0	0	0	0	0	0	0	0	0	0	k__Bacteria;p__Firmicutes;c__Clostridia;o__Lachnospirales;f__Lachnospiraceae
OTU_663	5.23049e-05	3.48699e-05	0	0	0	0	0	0	0	3.48699e-05	3.48699e-05	0	0	0	5.23049e-05	0	3.48699e-05	0	0	0	0	0	0	0	3.48699e-05	0	3.48699e-05	1.7435e-05	0	0	0	0	0	1.7435e-05	8.71748e-05	3.48699e-05	k__Bacteria;p__Proteobacteria;c__Alphaproteobacteria;o__Sphingomonadales;f__Sphingomonadaceae;g__Rhizorhapis;s__
OTU_664	0	0	0	0	0	0	0	0.000122045	0	0	0	0	0	0	0	0	0	0	0	0	0	0	0	0	0	0	0	0	0	0	0	0	0	0	0	0	k__Bacteria;p__Bacteroidota;c__Bacteroidia;o__Chitinophagales;f__Chitinophagaceae;g__Segetibacter;s__
OTU_665	0	0	3.48699e-05	0	0	0	0	0	0	0	0	0	0	0	3.48699e-05	0	0	0	0	0	0	0	0	0	0	0	8.71748e-05	0	0	1.7435e-05	0	0	0	0	0	0	k__Bacteria;p__unidentified_Bacteria;c__Polyangia;o__Polyangiales;f__Sandaracinaceae;g__;s__
OTU_666	0	0.00020922	0.00024409	0	0.00013948	0.00020922	0	3.48699e-05	0	0	6.97399e-05	5.23049e-05	0	0.00017435	0.000296394	0	0.000226655	0.000261525	0	0.00013948	0.000261525	0	8.71748e-05	0.00123788	3.48699e-05	0.000226655	0.000156915	0	6.97399e-05	0.000278959	0	0.00013948	0	0	0.000122045	0.00020922	k__Bacteria;p__Proteobacteria;c__Alphaproteobacteria;o__Sphingomonadales;f__Sphingomonadaceae
OTU_667	0	0	0	6.97399e-05	0	0	0	0	1.7435e-05	0	0	0	0	0	0	0	8.71748e-05	0	0	0	0	0	0	0	0	0	0	0	0	0	0	0	0	1.7435e-05	0	0	k__Bacteria
OTU_668	0	0	0	0	6.97399e-05	0	0	0	0	0	0	0	0	1.7435e-05	0	0	0	0	0	0	0	0	0	0	0	3.48699e-05	0	0	0	0	0	0	0	0	0	0	k__Bacteria;p__Actinobacteriota;c__Actinobacteria;o__Frankiales;f__Nakamurellaceae;g__Nakamurella
OTU_669	0	0	8.71748e-05	0	0	0	0	0	0	0	0	3.48699e-05	0	0	0.000156915	0	0.000226655	8.71748e-05	0	0	0	0	0	0	0	0	6.97399e-05	0	0	1.7435e-05	0	1.7435e-05	0	0	0	3.48699e-05	k__Bacteria;p__Verrucomicrobiota;c__Verrucomicrobiae;o__Verrucomicrobiales;f__Rubritaleaceae;g__Luteolibacter
OTU_670	0	0	0	0	0	0	0	0	0	0	0	1.7435e-05	0	0	0	0	0	0	0	0	0	0	8.71748e-05	5.23049e-05	0	3.48699e-05	0	0	0	0	0	0	0	0	0	0	k__Bacteria;p__Proteobacteria;c__Gammaproteobacteria;o__Legionellales;f__Legionellaceae;g__Legionella
OTU_671	0	0	0	0	0	0	0	0	0	0	0	0	0	0	0	0	1.7435e-05	0	0	0	0	0	0	0	0	0	0	0	0	0	0	0.00024409	0	0	0	0	k__Bacteria;p__Bacteroidota;c__Bacteroidia;o__Sphingobacteriales;f__Sphingobacteriaceae;g__Pedobacter
OTU_672	0	0	1.7435e-05	0	0	3.48699e-05	0	0	0	0	0	0	0	0	1.7435e-05	0	3.48699e-05	0	0	0	0	0	5.23049e-05	0	0	3.48699e-05	0	0	0	0	0	1.7435e-05	8.71748e-05	0	0	0	k__Bacteria;p__Myxococcota;c__Polyangia;o__Haliangiales;f__Haliangiaceae;g__Haliangium;s__
OTU_673	0	0	0	0	0	0	0	3.48699e-05	0.000191785	0	0	0	0	0	0	1.7435e-05	0	0	0	0	0	0	0	0	0	0	0	0	0	0	0	0	0	0	0	0	k__Bacteria
OTU_674	0	0	0	0	0	0	1.7435e-05	0.000122045	0	0	0	0	0	0	0	0	0	0	0	0.00010461	0	0	0	0	0	0	0	0	0	0	0	0	0	0	0	0	k__Bacteria
OTU_675	0	0	0	0	0	0	0	0.000191785	0.00010461	0	0	0	0	0	0	0	0	0	0	0	0	0	0	0	0	0	0	0	0	0	0	0	0	0	0	0	k__Bacteria;p__Firmicutes;c__Bacilli;o__Erysipelotrichales;f__Erysipelatoclostridiaceae;g__Erysipelatoclostridium;s__
OTU_676	0	1.7435e-05	0	0	0	0	0	0	0	0	0	0	0	0.000156915	0	0	0	0	0	0	0	0	6.97399e-05	0	0	0	0	0	0	0	0	0	0	0	0	0	k__Bacteria
OTU_677	0	0	0.000401004	0	0	3.48699e-05	0	0	6.97399e-05	0	0.000122045	0.000156915	1.7435e-05	6.97399e-05	0.000348699	0	3.48699e-05	6.97399e-05	0	3.48699e-05	3.48699e-05	0	0	3.48699e-05	0	1.7435e-05	1.7435e-05	0	0	1.7435e-05	1.7435e-05	6.97399e-05	0	0	0.00010461	0.000226655	k__Bacteria;p__Actinobacteriota;c__Actinobacteria;o__Micrococcales;f__Microbacteriaceae;g__Leucobacter;s__
OTU_678	0	0	0	0	0	0	0	0	0	0	0	0	0	0	0	0	0	0	0	0	3.48699e-05	0	0	0	0	0	0	0	0	0	0	0.00017435	0	0	0	0	k__Bacteria;p__Kapabacteria;c__unidentified_Kapabacteria;o__Kapabacteriales;f__;g__;s__
OTU_679	0	0	0	0	0	0	0.00024409	0	0	0	0	0	0	0	0	0	0	0	0	0	0	0	0	0	0	0	0	8.71748e-05	0	0	0	0	0	0	0	0	k__Bacteria
OTU_680	0	0	0	0	0	0	0	0	0	0	0	0	0	0	0	0	1.7435e-05	0	0	3.48699e-05	0	0	0	0	0	0	0	0	0	0	0	0.000122045	0	0	0	0	k__Bacteria;p__Proteobacteria;c__Alphaproteobacteria;o__Rickettsiales;f__Mitochondria
OTU_681	0	0	0	0	0	0	0	0.000226655	1.7435e-05	0	0	0	0	0	0	0	0	0	0	0	0	1.7435e-05	0	0	0	0	0	0	0	0	0	0	0	0	0	0	k__Bacteria;p__Firmicutes;c__Bacilli;o__RF39;f__;g__;s__
OTU_682	0	6.97399e-05	1.7435e-05	0	3.48699e-05	3.48699e-05	0	0	0	0	0.00024409	0	0	1.7435e-05	3.48699e-05	0	3.48699e-05	1.7435e-05	0	0	0	0	0	3.48699e-05	0	5.23049e-05	0	0	3.48699e-05	0	0	5.23049e-05	0	0	0.000191785	0	k__Bacteria;p__Verrucomicrobiota;c__Verrucomicrobiae;o__Opitutales;f__Opitutaceae;g__Opitutus;s__
OTU_683	5.23049e-05	0.00010461	0.00010461	3.48699e-05	0	1.7435e-05	3.48699e-05	0	0	0	1.7435e-05	1.7435e-05	3.48699e-05	5.23049e-05	8.71748e-05	0	0.00024409	0.00024409	0	6.97399e-05	5.23049e-05	0	0	3.48699e-05	0	3.48699e-05	5.23049e-05	5.23049e-05	0	0.00010461	3.48699e-05	0.000383569	1.7435e-05	0.000122045	5.23049e-05	5.23049e-05	k__Bacteria;p__Proteobacteria;c__Alphaproteobacteria;o__Caulobacterales;f__Caulobacteraceae;g__Caulobacter;s__
OTU_684	0	0	0	1.7435e-05	0	0	3.48699e-05	0.000383569	0.00013948	0	0	0	0	1.7435e-05	0	0	0	0	0	0	0	0	0	0	0	6.97399e-05	0	0	0	0	0	1.7435e-05	0	0	0	0	k__Bacteria
OTU_685	0	0	0	0	0	0	0	0	0	0	0	1.7435e-05	0	0	0	0	0	0.000278959	0	0	0	0	0	5.23049e-05	0	0	0	0	3.48699e-05	0	0	0.000156915	0	0	0	0	k__Bacteria;p__Bdellovibrionota;c__Bdellovibrionia;o__Bdellovibrionales;f__Bdellovibrionaceae;g__;s__
OTU_686	0	0	0	0	0	0	0	0.00013948	6.97399e-05	0	0	0	0	0	0	0	0	0	0	0	0	0	0	0	0	0	0	0	0	0	0	0	0	0	0	0	k__Bacteria;p__Firmicutes;c__Clostridia;o__Lachnospirales;f__Lachnospiraceae
OTU_687	5.23049e-05	0	0	0	0	0	0	0	0	1.7435e-05	0	0	0	0	0	0	0	0	0	0	0	0	0	0	0	0	0	0	0	0	0.00010461	0	0	0	0	0	k__Bacteria;p__Myxococcota;c__Polyangia;o__Polyangiales;f__Phaselicystidaceae;g__Phaselicystis
OTU_688	0	0	0	0	0	0	0	0.000122045	6.97399e-05	0	3.48699e-05	0	3.48699e-05	0	0	0	0	0	0	0	0	0	0	0	0	0	0	0	0	0	0	0	0	0	1.7435e-05	0	k__Bacteria;p__Firmicutes;c__Clostridia;o__Lachnospirales;f__Lachnospiraceae;g__Lachnospiraceae_NK4A136_group;s__Lachnospiraceae_bacterium_COE1
OTU_689	0.00020922	0	0	0	0	0	0	0	0	0	0	0	0	0	0	0	0	0	0	0	0	0	0	0	3.48699e-05	0	0	0	0	0	0	0	0	0	0	0	k__Bacteria
OTU_690	0	0	0	0	0	3.48699e-05	0	0	0	0	0	0	0	0	0	0	0	0	0	1.7435e-05	0	0	0	0	0	3.48699e-05	1.7435e-05	0	0	0	0	0	0	0	1.7435e-05	5.23049e-05	k__Bacteria;p__Chloroflexi;c__OLB14;o__;f__;g__;s__
OTU_691	1.7435e-05	0	0	5.23049e-05	0	0	0.000383569	0	0	0.000122045	0	0	0	0	0	0	0	0	0	0	0	0	0	0	6.97399e-05	0	0	1.7435e-05	0	0	0	0	0	3.48699e-05	0	0	k__Bacteria;p__Firmicutes;c__Clostridia;o__Oscillospirales;f__Butyricicoccaceae;g__Butyricicoccus;s__
OTU_692	0	0	3.48699e-05	0	0	0	0	0	0	0	1.7435e-05	3.48699e-05	0	0	8.71748e-05	0	0	0	0	3.48699e-05	0	0	0	0	0	1.7435e-05	0	0	1.7435e-05	0	0	0	0	0	1.7435e-05	8.71748e-05	k__Bacteria;p__unidentified_Bacteria;c__Alphaproteobacteria
OTU_693	0	0	0	0	0	0	0.00024409	0	0	0	0	0	0	0	0	0	0	0	0	0	0	0	0	0	0	0	0	0	0	0	0	0	0	1.7435e-05	0.000122045	0	k__Bacteria;p__Bacteroidota;c__Bacteroidia;o__Bacteroidales;f__Barnesiellaceae;g__Barnesiella;s__
OTU_694	0	0	0	0	0	0	5.23049e-05	0	0	0	0	3.48699e-05	0	0	3.48699e-05	0	0	0	0	0	0	0.000122045	0	0	0	1.7435e-05	0	0	0	0	3.48699e-05	0	0	0	3.48699e-05	0	k__Bacteria;p__Firmicutes;c__Bacilli;o__Lactobacillales;f__Lactobacillaceae;g__Lactobacillus;s__Lactobacillus_mucosae
OTU_695	0	0	0	0	0	0	0	0	0	0	0	1.7435e-05	0	1.7435e-05	0	0	0	0	0	0.00010461	6.97399e-05	0	0	0	0	0	1.7435e-05	0	0	0	0	5.23049e-05	0	0	0	0	k__Bacteria;p__Proteobacteria;c__Alphaproteobacteria;o__Azospirillales;f__Inquilinaceae;g__Inquilinus;s__
OTU_696	0	0	0	0	0	0	0	0	0	0	0	0	0	0	0	0	5.23049e-05	0	0	1.7435e-05	0	0	0	0	0	0	0	0	0	0	0	0	0	0	0.000122045	0	k__Bacteria;p__Bacteroidota;c__Bacteroidia;o__Bacteroidales;f__Muribaculaceae;g__;s__
OTU_697	0	0	0	0	0	0	0	0	0	0	0	0	0	1.7435e-05	0	0	6.97399e-05	0	0	3.48699e-05	5.23049e-05	0	0	0	0	0	0	0	0	6.97399e-05	0	0.000156915	0	0	0	0	k__Bacteria;p__Chloroflexi;c__Chloroflexia;o__Chloroflexales;f__Herpetosiphonaceae;g__Herpetosiphon;s__
OTU_698	0	0	0	0	0	0	0	0.00024409	0.000278959	0	0	0	0	0	0	0	0	0	0	0	0	0	0	0	0	0	0	0	0	0	0	0	0	0	0	0	k__Bacteria;p__Bacteroidota;c__Bacteroidia;o__Bacteroidales;f__Muribaculaceae;g__;s__
OTU_699	1.7435e-05	0	0	0	0	0	1.7435e-05	0	3.48699e-05	1.7435e-05	0	0	0	0	0	0	0	0	0	0	0	0	0	0	6.97399e-05	0	0	0	0	0	0	0	0	0	0	0	k__Bacteria
OTU_700	0	0	0	0	3.48699e-05	3.48699e-05	0	0	0	0	0	3.48699e-05	0	0	0	0	0	0	0	0	0	0	0	0	8.71748e-05	0	0	0	0	0	5.23049e-05	1.7435e-05	0	5.23049e-05	0	6.97399e-05	k__Bacteria;p__Myxococcota;c__Polyangia;o__mle1-27;f__;g__;s__
OTU_701	0	3.48699e-05	0	0	0	0.000122045	0	0	0	0	0	0	0	0	0	0	0	0	0	0	0	0	0	0	0	0	3.48699e-05	0	0	0	0	0	0	3.48699e-05	5.23049e-05	3.48699e-05	k__Bacteria;p__Firmicutes;c__Clostridia;o__Clostridiales;f__Clostridiaceae;g__Clostridium_sensu_stricto_1;s__Clostridium_butyricum
OTU_702	0	0	0	0	0	0	0.000122045	0	0	0	0	0	0	0	0	0	0	0	0	0	0	0	0	0	0	0	0	0	0	0	0	0	0	0	0	0	k__Bacteria
OTU_703	0	0	0	0	0	0	0	8.71748e-05	6.97399e-05	0	5.23049e-05	0	0	0	0	0	0	0	0	6.97399e-05	0	0	0	0	0	0	0	0	0	0	0	0	0	0	6.97399e-05	0	k__Bacteria;p__Firmicutes;c__Clostridia;o__Lachnospirales;f__Lachnospiraceae;g__[Eubacterium]_ventriosum_group;s__
OTU_704	0	0.00010461	0	0	0.000122045	0	0	0	0	0	0	0	0	8.71748e-05	0	0	5.23049e-05	0	0	0	0	0	0	0	0	5.23049e-05	5.23049e-05	0	0	0	0	0	0	0	0	0	k__Bacteria;p__Actinobacteriota;c__Actinobacteria;o__Frankiales;f__Nakamurellaceae;g__Nakamurella;s__
OTU_705	0	0	1.7435e-05	0	0	0	0	0	0	0	0	0	0	0	3.48699e-05	0	0	0	0	3.48699e-05	1.7435e-05	0	0	0	0	5.23049e-05	0	0	0	0	0	0	0	0	6.97399e-05	6.97399e-05	k__Bacteria;p__Acidobacteriota;c__Acidobacteriae;o__Bryobacterales;f__Bryobacteraceae;g__Bryobacter;s__
OTU_706	0	0	0	0.000575354	0	0	0	0	0	0	0	0	0	0	0	0	0	0	0	0	0	0	0	0	0	0	0	0	0	0	0	0	0	0	0	0	k__Bacteria;p__Firmicutes;c__Clostridia;o__Peptostreptococcales-Tissierellales;f__unidentified_Peptostreptococcales-Tissierellales
OTU_707	0	0	0	0	0	0	0	5.23049e-05	6.97399e-05	0	0	0	0	0	0	0	0	0	0	0	0	0	0	0	0	0	0	0	0	0	0	0	0	0	0	0	k__Bacteria;p__unidentified_Bacteria;c__Clostridia;o__Oscillospirales;f__Ruminococcaceae;g__;s__
OTU_708	0	0.000122045	3.48699e-05	0	0.000156915	8.71748e-05	0	0	0	0	5.23049e-05	1.7435e-05	0	0.000156915	0	0	5.23049e-05	0	0	0	0.00017435	0	0	1.7435e-05	0	0.00010461	0.000156915	0	0	8.71748e-05	0	0	0	0	0	0	k__Bacteria;p__Proteobacteria;c__Gammaproteobacteria;o__Xanthomonadales;f__Xanthomonadaceae;g__Lysobacter;s__Lysobacter_capsici
OTU_709	0	0	0	0	0	0	0	0.000226655	0.00010461	0	0	0	0	0	0	0	0	0	0	0	0	0	0	0	0	0	0	0	0	0	0	0	0	0	0	0	k__Bacteria;p__unidentified_Bacteria;c__Bacilli;o__Erysipelotrichales;f__Erysipelotrichaceae;g__;s__
OTU_710	0	0	1.7435e-05	0	0	8.71748e-05	0	0	0	0	3.48699e-05	0	0	0	0	0	0	0	0	0	0	0	0	0	0	1.7435e-05	5.23049e-05	0	0	0	0	0	0	0	5.23049e-05	3.48699e-05	k__Bacteria;p__Proteobacteria;c__Gammaproteobacteria;o__KF-JG30-C25;f__;g__;s__
OTU_711	0	0	0	0	0	0	0	0.000488179	0.000261525	0	0.00013948	0	5.23049e-05	0	0	0	0	0	1.7435e-05	0	0	1.7435e-05	0	0	0	0	0	0	0	0	0	0	0	0	0.00010461	0	k__Bacteria;p__Firmicutes;c__Clostridia;o__Clostridia_UCG-014;f__;g__;s__
OTU_712	0	0	0	0	0	0	0	0	0	0	1.7435e-05	0	0	0	0	0	5.23049e-05	0	0	3.48699e-05	0	0	0	0	0	0	0	0	0	0	0	0	0	0	8.71748e-05	0	k__Bacteria;p__Bacteroidota;c__Bacteroidia;o__Bacteroidales;f__Muribaculaceae;g__;s__
OTU_713	0	0	0	0	0	0	0	1.7435e-05	0	1.7435e-05	0	0	0	0	0	0	0.000296394	0	0	0.000313829	0	0	0	0	0	0	0	0	0	0	0	0.00010461	0	0	0	0	Unknown
OTU_714	0	0	0	0	8.71748e-05	1.7435e-05	0	0	0	0	0	6.97399e-05	0	0	0	0	0	0	0	6.97399e-05	0	0	0	0	0	0	0	0	0	1.7435e-05	0	0	3.48699e-05	0	8.71748e-05	6.97399e-05	k__Bacteria;p__Actinobacteriota;c__Acidimicrobiia;o__Microtrichales;f__Microtrichaceae;g__IMCC26207;s__
OTU_715	0	0	0	0	0	0	0	0.000122045	0.000331264	0	0	0	0	0	0	0	0	0	5.23049e-05	0	0	0	0	0	0	0	0	0	0	0	0	0	0	0	0	0	k__Bacteria;p__unidentified_Bacteria;c__Clostridia;o__Peptococcales;f__Peptococcaceae;g__;s__
OTU_716	0	0	0	0	0	0	0	0	0	0	0	0	0	3.48699e-05	0	0	0.00020922	0	0	6.97399e-05	0	0	0	0	0	3.48699e-05	0	0	0	0	0	0.00013948	0	0	0	0	k__Bacteria;p__Bacteroidota;c__Bacteroidia;o__Chitinophagales;f__Chitinophagaceae;g__Ferruginibacter;s__
OTU_717	0	0	0	0	0	0	0	0	0	0	0	0	0	0	0	0	0	0	0	0	0	0	0	3.48699e-05	0	0	3.48699e-05	0	0	0	0	5.23049e-05	0	0	0	3.48699e-05	k__Bacteria;p__Firmicutes;c__Bacilli;o__Thermoactinomycetales;f__Thermoactinomycetaceae;g__Shimazuella;s__
OTU_718	0	0	5.23049e-05	0	1.7435e-05	0	0	0	0	0	3.48699e-05	8.71748e-05	0	1.7435e-05	0	0	0	0	0	3.48699e-05	0	0	0	0	0	0	5.23049e-05	0	0	0	0	6.97399e-05	0	0	3.48699e-05	5.23049e-05	k__Bacteria;p__unidentified_Bacteria;c__Thermoleophilia;o__Gaiellales;f__;g__;s__
OTU_719	0	0	0	0	0	0	0	0.00010461	8.71748e-05	0	0	0	0	0	0	0	0	0	0	0	0	0	0	0	0	0	0	0	0	0	0	0	0	0	0	0	k__Bacteria;p__Firmicutes;c__Clostridia;o__Oscillospirales;f__Ruminococcaceae;g__Negativibacillus;s__
OTU_720	0	0	0	1.7435e-05	0	0	0.00013948	0	0	1.7435e-05	0	0	0	0	0	0	0	0	0	0	0	0	0	0	0.000453309	0	0	6.97399e-05	0	0	0	0	0	0	0	0	k__Bacteria;p__Bacteroidota;c__Bacteroidia;o__Bacteroidales;f__Rikenellaceae;g__Alistipes;s__Alistipes_finegoldii
OTU_721	0	0	0	0	0	0	0	0.000331264	0.000226655	0	0	0	0	0	0	0	3.48699e-05	0	3.48699e-05	0	0	3.48699e-05	0	0	0	0	0	0	0	0	0	0	0	0	6.97399e-05	0	k__Bacteria;p__unidentified_Bacteria;c__Clostridia;o__Oscillospirales;f__Oscillospiraceae;g__;s__
OTU_722	0	0	0	0	0	0	0	0	0	0	0	8.71748e-05	0	0	0	0	0	8.71748e-05	0	1.7435e-05	0	0	0	0	0	0	0	0	0	0	0	1.7435e-05	0	0	0	0	k__Bacteria;p__unidentified_Bacteria;c__Polyangia;o__Polyangiales;f__Sandaracinaceae;g__;s__
OTU_723	0	0	0	0	0	0	0	0.000191785	0.000226655	0	0	0	0	0	0	0	0	0	0	0	0	3.48699e-05	0	0	0	0	0	0	0	0	0	0	0	0	0	0	k__Bacteria;p__Bacteroidota;c__Bacteroidia;o__Bacteroidales;f__Muribaculaceae;g__Muribaculum;s__
OTU_724	0	0	0	0	0	0	0	0	0	0	1.7435e-05	0	0	0	0	3.48699e-05	0	0	0	8.71748e-05	0	0	0	0	0	0	0	0	0	0	0	0	0	0	5.23049e-05	0	k__Bacteria;p__Bacteroidota;c__Bacteroidia;o__Bacteroidales;f__Muribaculaceae;g__;s__
OTU_725	1.7435e-05	0	0	0	0	0	0	5.23049e-05	0.000156915	0	0	0	0	0	0	0	0	0	0	0	0	0	0	0	0	0	0	5.23049e-05	0	0	0	0	0	0	0	0	k__Bacteria
OTU_726	0	0	0	0	0	0	0	8.71748e-05	3.48699e-05	0	0	0	0	0	0	0	0	0	0	0	0	0	0	0	0	0	0	0	0	0	0	0	0	0	0	0	k__Bacteria;p__Desulfobacterota;c__Desulfovibrionia;o__Desulfovibrionales;f__Desulfovibrionaceae;g__Bilophila;s__
OTU_727	0	0	0	0	0	0	0	0	0	0	0	0	0	0	0	0	0	0	0	0	0	0	0	0	8.71748e-05	0	0	0	0	0	0	0	0	5.23049e-05	0	0	k__Bacteria;p__Firmicutes;c__Clostridia;o__Lachnospirales;f__Lachnospiraceae;g__[Eubacterium]_ruminantium_group;s__
OTU_728	0	0	0	0	0	0	0	3.48699e-05	8.71748e-05	0	0	0	0	0	0	0	5.23049e-05	0	0	0	0	0	0	0	0	0	0	0	0	0	0	0	0	0	0	0	k__Bacteria;p__Firmicutes;c__Clostridia;o__Oscillospirales;f__Ruminococcaceae;g__Pygmaiobacter;s__
OTU_729	0	0	0	0	0	0	0	3.48699e-05	0	0	0	0	0.000122045	0	0	0	0	0	0	0	0	0	0	0	0	0	0	0	0	0	0	0	0	0	0	0	k__Bacteria;p__Proteobacteria;c__Alphaproteobacteria;o__Rhodobacterales;f__Rhodobacteraceae
OTU_730	0	0	0	0	0	0	0	0	0	0	0	3.48699e-05	0	0	0	0	0.000122045	0	0	0	0	0	0	0	0	0	0	0	0	0	0	0	0	0	0	6.97399e-05	k__Bacteria;p__Proteobacteria;c__Gammaproteobacteria;o__Xanthomonadales;f__Rhodanobacteraceae;g__Dokdonella;s__
OTU_731	0	0	0	0	0	0	0	0	0	0	0.000156915	0	0	0	0	0	0	0	0	0	0	0	0	0	0	0	0	0	0	0	0	0	0	0	0.00010461	0	k__Bacteria;p__unidentified_Bacteria;c__Alphaproteobacteria;o__unidentified_Alphaproteobacteria;f__unidentified_Alphaproteobacteria;g__unidentified_Alphaproteobacteria;s__Rhodospirillaceae_bacterium
OTU_732	0	8.71748e-05	0.00013948	0	0	5.23049e-05	0	0	0	0	3.48699e-05	0	0	6.97399e-05	0.000261525	0	1.7435e-05	0	0	0.00010461	0	0	1.7435e-05	0	0	0	3.48699e-05	0	0	0	0	6.97399e-05	8.71748e-05	0	3.48699e-05	0	k__Bacteria;p__unidentified_Bacteria;c__Vicinamibacteria;o__Vicinamibacterales
OTU_733	0	0	5.23049e-05	0	0	3.48699e-05	0	0	0	0	0	3.48699e-05	0	0	3.48699e-05	0	5.23049e-05	1.7435e-05	0	0.00013948	5.23049e-05	0	0	0	5.23049e-05	0	6.97399e-05	0.00024409	8.71748e-05	0.00010461	1.7435e-05	0	0	5.23049e-05	0	1.7435e-05	k__Bacteria;p__Proteobacteria;c__Gammaproteobacteria;o__Burkholderiales;f__Alcaligenaceae
OTU_734	5.23049e-05	0	0	0	0	0	0	0	0	0	0	0	0	0	0	0	0	0	0	0	0	0	0	0	0	0	0	8.71748e-05	0	0	0	0	0	0	0	0	k__Bacteria
OTU_735	0	5.23049e-05	0.000122045	0	0	1.7435e-05	0	0	0	0	0	0	0	0	0	0	0	0	0	0	0	0	0	0	0	0	0	0	0	1.7435e-05	0	0	0	0	0	0	k__Bacteria;p__Proteobacteria;c__Gammaproteobacteria;o__Pseudomonadales;f__Moraxellaceae;g__Moraxella
OTU_736	0	0	0	0	0	0	0	0	0.000122045	0	0	0	0	0	0	0	1.7435e-05	0	0	1.7435e-05	0	0	0	0	0	0	0	0	0	0	0	0	0	0	0	0	k__Bacteria
OTU_737	0	0	0	0	0	0	0	0	0	0	0	0	0	0	0	0	0	0	0	0.00010461	0	0	0	0	0	0	0	0	0	0	0	0	0	0	0	0	Unknown
OTU_738	0	5.23049e-05	0	0	0	0	0	0	0	0	6.97399e-05	0	0	0	0	0	0	0	0	0	0	0	0	0	0	0	0	0	0	0	0	0	0	0	8.71748e-05	0	k__Bacteria;p__unidentified_Bacteria;c__Verrucomicrobiae;o__Pedosphaerales;f__Pedosphaeraceae;g__;s__
OTU_739	0	0	0	0	0	0	5.23049e-05	0	0	0	0	0	0	0	0	0	8.71748e-05	0	0	0	0	0	0	0	0	0	0	0	0	0	0	6.97399e-05	0	5.23049e-05	0	0	k__Bacteria;p__Proteobacteria
OTU_740	0	0	0	0	0	0	0	0	0	0	0	0	0	0	0	0	0	0	0	0.000122045	0	0	0	0	0	0	0	0	0	0	0	0	0	0	0	0	k__Bacteria;p__Acidobacteriota;c__Thermoanaerobaculia;o__Thermoanaerobaculales;f__Thermoanaerobaculaceae;g__Subgroup_10;s__
OTU_741	0	0	0	0	0	0	1.7435e-05	0.000401004	0.000784574	0	5.23049e-05	0	0	0	0	0	0	0	0	0	0	1.7435e-05	0	0	0	0	0	0	0	0	0	0	0	0	5.23049e-05	0	k__Bacteria;p__Firmicutes;c__Clostridia;o__Clostridia_UCG-014;f__;g__;s__
OTU_742	0	0	0	0	0	0	0	0.000348699	0.000226655	5.23049e-05	0	0	0	0	0	0	0	0	0	0	0	5.23049e-05	0	0	0	0	0	0	0	0	0	0	0	0	0	0	k__Bacteria;p__Bacteroidota;c__Bacteroidia;o__Bacteroidales;f__Muribaculaceae;g__;s__
OTU_743	0	0	0	0	0	5.23049e-05	0	0	0	0	0	0	0	0	0	0	0	0.000156915	0	0	0	0	0	0	0	0	5.23049e-05	0	0	0	0	0	0	0	0	1.7435e-05	k__Bacteria;p__unidentified_Bacteria;c__Polyangia;o__Polyangiales;f__Sandaracinaceae;g__;s__
OTU_744	0.000767139	0.000122045	0.000156915	8.71748e-05	3.48699e-05	8.71748e-05	3.48699e-05	0	0	0.00102866	0.000296394	0.000348699	0	0.00010461	3.48699e-05	0	0	1.7435e-05	0	0	5.23049e-05	0	8.71748e-05	0	6.97399e-05	0	1.7435e-05	0.000366134	3.48699e-05	0.000122045	0.000122045	0	0	0.000156915	0.000122045	0	k__Bacteria;p__Bacteroidota;c__Bacteroidia;o__Flavobacteriales;f__Weeksellaceae;g__Chryseobacterium
OTU_745	0	0	0	0	1.7435e-05	0	0	0.000348699	0.00013948	0	3.48699e-05	0	0	0	0	0	0	0	0	0	0	0	0	0	0	0	0	0	0	0	0	0	0	0	6.97399e-05	0	k__Bacteria;p__Firmicutes;c__Clostridia;o__Christensenellales;f__Christensenellaceae;g__Christensenellaceae_R-7_group;s__
OTU_746	0	0	0	0	0	0	5.23049e-05	0	0	1.7435e-05	0	0	0	0	0	0	0	0	0	0	0	0	0	0	3.48699e-05	0	0	0.00010461	0	0	1.7435e-05	0	0	3.48699e-05	0	0	k__Bacteria;p__Proteobacteria;c__Gammaproteobacteria;o__Burkholderiales;f__Rhodocyclaceae;g__Sterolibacterium;s__
OTU_747	0	0	0	0	0	1.7435e-05	0	1.7435e-05	0	0	0	0	0	0	0	0	0	0	0	0	0	0	0	0	1.7435e-05	8.71748e-05	0	0	0	0	0	3.48699e-05	0.00017435	6.97399e-05	0.00017435	3.48699e-05	Unknown
OTU_748	0	0	1.7435e-05	0	0	0	0	3.48699e-05	0	0	0	5.23049e-05	0	0	8.71748e-05	0	8.71748e-05	6.97399e-05	0	0	0	0	0	3.48699e-05	0	1.7435e-05	5.23049e-05	0	0	3.48699e-05	0	8.71748e-05	0	0	0	0	k__Bacteria;p__unidentified_Bacteria;c__Alphaproteobacteria;o__Caulobacterales;f__Caulobacteraceae;g__;s__
OTU_749	0	0	0	0	0	0	0	0	0	0	0	8.71748e-05	0	0	0	0	0	0	0	0	0	0	0	0	0	0	5.23049e-05	0	0	0	0	0	0	0	0	0	k__Bacteria;p__Actinobacteriota;c__Acidimicrobiia;o__IMCC26256;f__;g__;s__
OTU_750	0	0	0	0	0	0	0	0	0	0	0	0	0	0	0	0	0	0	0	0	0	0	0	0	0	0	0	0	0	0	0	0	0	0.000156915	0	0	k__Bacteria
OTU_751	0	0	0	0	0	0	0	8.71748e-05	0.00010461	0	0	0	0	0	0	0	0	0	0	0	0	0	0	0	0	0	0	0	0	0	0	0	0	0	0	0	k__Bacteria
OTU_752	0	0	0	1.7435e-05	0	0	0	0	0	0	0	0	0	0	0	0	0	0	0	0	0	0	0	0	0	0	0	0	0	0	0	0.000156915	0	0	0	0	k__Bacteria
OTU_753	1.7435e-05	0	0	0	0	0	8.71748e-05	0	1.7435e-05	0	0	0	0	0	0	0	0	0	0	0	0	0	0	0	0	0	0	0	0	0	0	0	0	0	0	0	k__Bacteria
OTU_754	0	0	0	1.7435e-05	0	0	0	0	0	0	0	0	0	5.23049e-05	0	0	0	0	0	0	0	0	0	0	6.97399e-05	0	0	5.23049e-05	0	0	0	0	0	1.7435e-05	3.48699e-05	5.23049e-05	k__Bacteria;p__unidentified_Bacteria;c__unidentified_Bacteria;o__Gemmatimonadales;f__Gemmatimonadaceae
OTU_755	0	0	0	0	0	0	0	0	0.000278959	0	0	0	0	0	0	0	0	0	0	0	0	0	0	0	0	0	0	0	0	0	0	0	0	0	0	0	k__Bacteria
OTU_756	0	0	5.23049e-05	0	0	0	0	0	0	0	0	0	0	0	8.71748e-05	0	0.00017435	3.48699e-05	0	1.7435e-05	0	0	0	0	0	0	0	0	0	0	0	0	0	0	5.23049e-05	0	k__Bacteria;p__Desulfobacterota;c__Desulfuromonadia;o__;f__;g__;s__
OTU_757	0	0	0	1.7435e-05	0	0	0	0	0	3.48699e-05	0	0	0	0	0	0	0	0	0	0	0	0	0	0	1.7435e-05	0	0	0.00010461	0	0	0.00024409	0	0	1.7435e-05	0	0	k__Bacteria;p__Bacteroidota;c__Bacteroidia;o__Flavobacteriales;f__Weeksellaceae;g__Chryseobacterium;s__Chryseobacterium_sp_A1-ST2
OTU_758	0	0	0	0	0	0	0.00020922	0	0	0	0	0	0	0	0	0	0	0	0	0	0	0	0	0	0	0	0	0	0	0	0	0	0	0	0	0	k__Bacteria
OTU_759	0	0	0	0	0	0	0	0	0	0	0	0	0	3.48699e-05	0	0	3.48699e-05	1.7435e-05	0	0	8.71748e-05	0	0	1.7435e-05	0	0	0	0	0	0.000122045	0	0.000226655	0	0	0	0	k__Bacteria;p__Cyanobacteria;c__Sericytochromatia;o__;f__;g__;s__
OTU_760	0	0	0	0	0	0	0	8.71748e-05	0.000156915	0	0	0	0	0	0	0	0	0	0	0	0	0	0	0	0	0	0	0	0	0	0	0	0	0	0	0	k__Bacteria;p__Firmicutes;c__Clostridia;o__Monoglobales;f__Monoglobaceae;g__Monoglobus;s__
OTU_761	0	0	0	0	0	0	0	0.000296394	3.48699e-05	0	0	0	0	0	0	0	0	0	0	0	0	3.48699e-05	0	0	0	0	0	0	0	0	0	0	0	0	0	0	k__Bacteria;p__Firmicutes;c__Clostridia;o__Clostridia_UCG-014;f__;g__;s__
OTU_762	3.48699e-05	0	0	5.23049e-05	0	0	6.97399e-05	0.00017435	3.48699e-05	0	0	0	1.7435e-05	0	0	0	0	0	0	1.7435e-05	3.48699e-05	0	0	0	0	0	0	0	0	0	0	1.7435e-05	0	0	0	0	k__Bacteria
OTU_763	6.97399e-05	0	0	0	0	0	3.48699e-05	0	0	1.7435e-05	0	0	0	0	0	0	0	0	0	0	0	0	0	0	0.00013948	0	0	8.71748e-05	0	0	0	0	0	1.7435e-05	0	0	k__Bacteria;p__Proteobacteria;c__Gammaproteobacteria;o__Pseudomonadales;f__Moraxellaceae;g__[Agitococcus]_lubricus_group;s__
OTU_764	0	0	3.48699e-05	3.48699e-05	0	3.48699e-05	0	0	0	0	0	0	0	0	0	0	1.7435e-05	0	0	0	0	0	0	0	0	0	0	1.7435e-05	0	0	0	0	0	0	0	0	k__Bacteria;p__Actinobacteriota;c__Actinobacteria;o__PeM15;f__;g__;s__
OTU_765	0	0	3.48699e-05	0	0	5.23049e-05	0	0	0	0	6.97399e-05	0	0	0	1.7435e-05	0	0	0	0	0	0	0	1.7435e-05	0	0	0	0	0	0	0	0	0	0	0	6.97399e-05	1.7435e-05	k__Bacteria;p__Proteobacteria;c__Gammaproteobacteria;o__Salinisphaerales;f__Solimonadaceae;g__Panacagrimonas;s__
OTU_766	0	3.48699e-05	0	0	3.48699e-05	5.23049e-05	0	0	0	0	1.7435e-05	0	1.7435e-05	0	0	0	0	1.7435e-05	0	0	0	0	5.23049e-05	0	0	3.48699e-05	6.97399e-05	0	0	0	0	6.97399e-05	0	0	5.23049e-05	5.23049e-05	k__Bacteria;p__Proteobacteria;c__Alphaproteobacteria;o__Rhizobiales;f__KF-JG30-B3;g__;s__
OTU_767	0	0	0	0	0	0	0	0	0	0	3.48699e-05	0	0	0	0	0	0	0	0	3.48699e-05	0	0	0	0	0	0	0	0	0	0	0	0	0	0	0.00017435	0	k__Bacteria;p__Bacteroidota;c__Bacteroidia;o__Bacteroidales;f__Muribaculaceae;g__;s__
OTU_768	0	3.48699e-05	3.48699e-05	0	0	0	0	0	0	0	0	6.97399e-05	0	0.00010461	0	0	3.48699e-05	0.000191785	0	0	0	0	0	8.71748e-05	0	3.48699e-05	1.7435e-05	0	3.48699e-05	6.97399e-05	0	1.7435e-05	0	0	0	0	k__Bacteria;p__Proteobacteria;c__Gammaproteobacteria;o__Xanthomonadales;f__Xanthomonadaceae;g__Luteimonas
OTU_769	0	0	0	0	0	0	0	8.71748e-05	6.97399e-05	0	0	0	0	0	0	0	0	0	0	0	0	0	0	0	0	0	0	0	0	0	0	0	0	0	0	0	Unknown
OTU_770	0	0	0	0	0	0	0	0	0	0	1.7435e-05	0	0	0	0	0	0	0	0	0	0	0	0	0	0	0	0	0	0	0	0	0	0	0	8.71748e-05	0	k__Bacteria;p__Proteobacteria;c__Alphaproteobacteria;o__Rickettsiales;f__Mitochondria;g__unidentified_Mitochondria
OTU_771	0	0	0	1.7435e-05	0	0	0	0	0	1.7435e-05	0	0	0	0	0	0	0	0	0	0	0	0	0	0	0.00010461	0	0	1.7435e-05	0	0	0.00017435	0	0	0.000122045	0	0	k__Bacteria;p__Proteobacteria;c__Gammaproteobacteria;o__Burkholderiales;f__Comamonadaceae
OTU_772	0	0	0	0	0	0	0	0.000313829	0.00024409	0	0	0	0	0	0	0	0	0	0	0	0	0	0	0	0	0	0	0	0	0	0	0	0	0	0	0	k__Bacteria;p__Firmicutes;c__Clostridia;o__Lachnospirales;f__Lachnospiraceae;g__Roseburia;s__
OTU_773	0	1.7435e-05	0	0	0	8.71748e-05	0	0	0	0	0.00010461	0	0	6.97399e-05	0	0	3.48699e-05	0	0	0	0	0	0	0	0	0	0	0	3.48699e-05	0	0	0	1.7435e-05	0	3.48699e-05	0	k__Bacteria;p__unidentified_Bacteria;c__unidentified_Bacteria;o__Gemmatimonadales;f__Gemmatimonadaceae;g__;s__
OTU_774	0.00010461	1.7435e-05	0.000122045	0	0	3.48699e-05	0.00013948	0	1.7435e-05	0	0	0	0	0	3.48699e-05	0	0	0	5.23049e-05	0	0	1.7435e-05	0	0	0.00010461	0	6.97399e-05	3.48699e-05	0	3.48699e-05	0	0	0	3.48699e-05	1.7435e-05	1.7435e-05	k__Bacteria;p__Firmicutes;c__Bacilli;o__Lactobacillales;f__Streptococcaceae;g__Streptococcus
OTU_775	0	3.48699e-05	5.23049e-05	0	1.7435e-05	0.00013948	0	0	0	0	0	5.23049e-05	3.48699e-05	5.23049e-05	1.7435e-05	0	0.00010461	0	0	3.48699e-05	3.48699e-05	0	0	0	0	0	0	0	0	0	0	3.48699e-05	1.7435e-05	0	0	0	k__Bacteria;p__Proteobacteria;c__Gammaproteobacteria
OTU_776	0	0	0	0	0	0	0	0	0	0	0	8.71748e-05	0	0	0	0	0	0	0	1.7435e-05	0	0	0	0	0	0	0	0	0	0	0	0	0	0	0	0.00010461	k__Bacteria;p__Acidobacteriota;c__Blastocatellia;o__Blastocatellales;f__Blastocatellaceae;g__JGI_0001001-H03;s__
OTU_777	0	3.48699e-05	0.00017435	0	0	6.97399e-05	0	0	0	0	0	3.48699e-05	0	5.23049e-05	1.7435e-05	0	0.00010461	0	0	0	1.7435e-05	0	6.97399e-05	0	0	0	5.23049e-05	0	0	0	0	6.97399e-05	5.23049e-05	0	1.7435e-05	0	k__Bacteria;p__unidentified_Bacteria;c__Anaerolineae;o__Caldilineales;f__Caldilineaceae;g__;s__
OTU_778	0	6.97399e-05	3.48699e-05	0	0	0	0	0	0	0	0	0	0	5.23049e-05	0	0	1.7435e-05	1.7435e-05	0	0	0	0	3.48699e-05	0	0	0	0	1.7435e-05	0	0	0	0	0	0	0	0	k__Bacteria;p__Chloroflexi;c__Chloroflexia;o__Thermomicrobiales;f__JG30-KF-CM45;g__;s__
OTU_779	0	0	0	0	0	0	0	0	0	0	1.7435e-05	0	0	0	0	0	0.00010461	0.00024409	0	1.7435e-05	0	0	0	1.7435e-05	0	0	5.23049e-05	0	0	0	0	0.000470744	0	0	0	0	k__Bacteria;p__Proteobacteria;c__Gammaproteobacteria;o__Burkholderiales;f__Methylophilaceae;g__Methylophilus;s__
OTU_780	0	0	0	0	0	0	0	0	0	0	0	0	0.000383569	0	0	0	0	0	0	0	0	0	0	0	0	0	0	0	0	0	0	0	0	0	0	0	k__Bacteria;p__Proteobacteria;c__Gammaproteobacteria;o__Alteromonadales;f__Marinobacteraceae;g__Marinobacter
OTU_781	5.23049e-05	0	0	0	0	0	0	0.000366134	0.00017435	0	0	0	0	0	0	0	0	0	0	0	0	0	0	0	0.000156915	0	0	0	0	0	0	0	0	0	0	0	k__Bacteria
OTU_782	0	0	0	0	0	0	0	0	0	0	0	5.23049e-05	0	0	0	0	5.23049e-05	1.7435e-05	0	3.48699e-05	0	0	0	0	0	0	0	0	0	0	0	0	0	0	0	8.71748e-05	k__Bacteria;p__unidentified_Bacteria;c__Polyangia;o__Polyangiales;f__Sandaracinaceae;g__;s__
OTU_783	0	0	0	0	1.7435e-05	0	0	0	0	1.7435e-05	3.48699e-05	1.7435e-05	0	1.7435e-05	0	0	0	5.23049e-05	0	0	0	0	0	3.48699e-05	0	0	3.48699e-05	0	0	0	0	0	0	0	0	0	k__Bacteria;p__Proteobacteria;c__Alphaproteobacteria;o__Rhizobiales;f__Amb-16S-1323;g__;s__
OTU_784	0	5.23049e-05	0	0	0	0	0	0	0	0	0	0	0	0.00010461	3.48699e-05	0	0	5.23049e-05	0	0	0	0	0	0	0	1.7435e-05	3.48699e-05	0	0	0	0	0	3.48699e-05	0	0	0	k__Bacteria;p__Acidobacteriota;c__Vicinamibacteria;o__Vicinamibacterales;f__Vicinamibacteraceae;g__;s__
OTU_785	0	0	0	0	0	0	3.48699e-05	0	0	0	5.23049e-05	3.48699e-05	0	0.00013948	3.48699e-05	0	0	1.7435e-05	0	0	0	0	3.48699e-05	0	0	0	1.7435e-05	0	0	0	1.7435e-05	0	0	0	0	0	k__Bacteria;p__Firmicutes;c__Bacilli;o__Staphylococcales;f__Gemellaceae;g__Gemella;s__
OTU_786	0	0	1.7435e-05	0	0	0	0	0	0	0	0	0	0	0	5.23049e-05	0	3.48699e-05	0	0	5.23049e-05	0	0	0	8.71748e-05	0	0	0	0	0	0	0	1.7435e-05	0	0	0	1.7435e-05	k__Bacteria;p__Myxococcota;c__Polyangia;o__Polyangiales;f__BIrii41;g__;s__
OTU_787	0	0	0	0	0	0	0.000366134	0	0	0	0	0	0	0	0	0	0	0	0	0	0	0	0	0	0	0	0	0	0	0	0	0	0	1.7435e-05	0	0	k__Bacteria;p__Firmicutes;c__Bacilli;o__RF39;f__;g__;s__
OTU_788	0	0	3.48699e-05	0	0	0	0	0	0	0	0	1.7435e-05	0	0	0	3.48699e-05	3.48699e-05	5.23049e-05	0	0	3.48699e-05	0	0	0	0	0	0	0	0	0	0	0	0	0	0	0	k__Bacteria;p__unidentified_Bacteria;c__Thermoleophilia;o__Solirubrobacterales;f__Solirubrobacteraceae
OTU_789	0	0	0	0	0	0	0	0	0	0	0	0	0	0	0.00013948	0	0	0	0	0	0	0	0	0	0	0	0	0	0	0	0	0	0	0	0	0	k__Bacteria;p__Verrucomicrobiota;c__Verrucomicrobiae;o__Opitutales;f__Opitutaceae;g__Lacunisphaera;s__
OTU_790	0	0	3.48699e-05	1.7435e-05	0	0	0	0	0	0	3.48699e-05	0	1.7435e-05	0	0	0	5.23049e-05	0	0	0	1.7435e-05	0	1.7435e-05	0	0	0	0	0	0	1.7435e-05	0	0	0	1.7435e-05	0	0	k__Bacteria;p__Proteobacteria;c__Alphaproteobacteria;o__Azospirillales;f__unidentified_Azospirillales;g__Stella;s__
OTU_791	0.00010461	0	0	0.000191785	0	0	0.000156915	0	0	1.7435e-05	0	0	0	0	0	0	0	0.00010461	0	0	0	0	0	0	8.71748e-05	0	0	5.23049e-05	0	0	8.71748e-05	0	0	5.23049e-05	0	0	k__Bacteria;p__Bacteroidota;c__Bacteroidia;o__Flavobacteriales;f__Flavobacteriaceae;g__Flavobacterium
OTU_792	0	3.48699e-05	0	0	0	6.97399e-05	0	0	0	0	0	1.7435e-05	1.7435e-05	5.23049e-05	0	0	3.48699e-05	0	0	0	0	0	0	0	0	0	8.71748e-05	0	0	0	0	0	0	0	0	0	k__Bacteria;p__unidentified_Bacteria;c__Alphaproteobacteria;o__Elsterales;f__;g__;s__
OTU_793	0	0	0	0	0	0	0	0.000348699	0.00013948	0	0	0	0	0	0	0	0	0	0	0	0	0	0	0	0	0	0	0	0	0	0	0	0	0	0	0	k__Bacteria;p__Bacteroidota;c__Bacteroidia;o__Bacteroidales;f__Muribaculaceae;g__;s__
OTU_794	0	0	0	0	1.7435e-05	0	0	0	0	0	1.7435e-05	0	0	5.23049e-05	3.48699e-05	0	1.7435e-05	0	0	0	0	0	0	0	0	3.48699e-05	1.7435e-05	0	0	0	0	0	0	0	0	0	k__Bacteria;p__Acidobacteriota;c__Acidobacteriae;o__Bryobacterales;f__Bryobacteraceae;g__Bryobacter;s__
OTU_795	0	3.48699e-05	0	0	0	0	0	0	0	0	0	0	0	1.7435e-05	0	0	0	0	0	0	0	0	0	0	6.97399e-05	0	0	3.48699e-05	0	0	1.7435e-05	0	0	3.48699e-05	0	0	k__Bacteria;p__unidentified_Bacteria;c__Gammaproteobacteria;o__Xanthomonadales;f__Rhodanobacteraceae;g__;s__
OTU_796	0	0	0	0	0	0	0	0.000122045	0	0	0	0	0	0	0	0	0	0	0	0	0	0	0	0	0	0	0	0	0	0	0	0	0	0	0	0	k__Bacteria;p__Campilobacterota;c__Campylobacteria;o__Campylobacterales;f__Helicobacteraceae;g__Helicobacter;s__Helicobacter_hepaticus
OTU_797	0	0	0	0	0	3.48699e-05	0	0	0	0	0	0	0	3.48699e-05	0	0	0	0	0	0	0	0	0	0	0	3.48699e-05	0.00010461	0	0	0	0	0	1.7435e-05	0	0	0	k__Bacteria;p__Myxococcota;c__Polyangia;o__Polyangiales;f__Polyangiaceae;g__Pajaroellobacter;s__
OTU_798	0	0	0	0	0	0	0	0	0	0	0	0	0	0	0	0	0	0	0	0	0	0	0	0	0	0	0	0	0	0	0	0.000156915	0	0	0	0	k__Bacteria
OTU_799	0	0	0	0	0	0	0	0.000226655	0.000122045	0	0	0	0	0	0	0	0	0	0	0	0	0	0	0	0	0	0	0	0	0	0	0	0	0	0	0	k__Bacteria;p__Firmicutes;c__Clostridia;o__Lachnospirales;f__Lachnospiraceae;g__A2;s__
OTU_800	0	0	0	0	0	5.23049e-05	0	0	0	0	0	3.48699e-05	0	0	1.7435e-05	0	0	0	0	1.7435e-05	0	0	0	0	0	0	0	0	0	0	0	0	0	0	0	0	k__Bacteria;p__Acidobacteriota;c__Acidobacteriae;o__Subgroup_2;f__;g__;s__
OTU_801	0	0	1.7435e-05	0	0	5.23049e-05	0	0	0	0	5.23049e-05	3.48699e-05	0	0	1.7435e-05	0	0	5.23049e-05	0	1.7435e-05	0	0	0	1.7435e-05	0	0	8.71748e-05	0	0	0	0	6.97399e-05	0	0	0	6.97399e-05	k__Bacteria;p__Firmicutes;c__Bacilli;o__Bacillales;f__Bacillaceae;g__Bacillus;s__Bacillus_lentus
OTU_802	0	6.97399e-05	1.7435e-05	0	0	0	0	0	0	0	0	0	0	0	6.97399e-05	0	0	0	0	0	0	0	0	0	0	0	0	0	0	0	0	0	0	0	0	0	k__Bacteria;p__Myxococcota;c__Polyangia;o__Polyangiales;f__Polyangiaceae;g__Pajaroellobacter;s__
OTU_803	0	0	0	0	0	0	0	0.000156915	0.000226655	0	0	0	0	0	0	0	0	0	0	0	0	0	0	0	0	0	0	0	0	0	0	0	0	0	0	0	k__Bacteria;p__Firmicutes;c__Clostridia;o__Lachnospirales;f__Lachnospiraceae
OTU_804	0	0	6.97399e-05	0	1.7435e-05	0	0	0	0	0	0	3.48699e-05	0	0	0.000156915	0	6.97399e-05	0	0	3.48699e-05	0	0	0	0	0	0	3.48699e-05	0	0	0	0	0	0	0	0	0	k__Bacteria;p__Actinobacteriota;c__Actinobacteria;o__Corynebacteriales;f__Mycobacteriaceae;g__Mycobacterium
OTU_805	3.48699e-05	0	0	3.48699e-05	0	0	0	0	0	0	0	0	0	0	0	0	0	0	0	0	0	0	0	0	0.000122045	0	0	0	0	0	0	0	0	0	0	0	k__Bacteria;p__Actinobacteriota;c__Coriobacteriia;o__Coriobacteriales;f__unidentified_Coriobacteriales;g__Raoultibacter
OTU_806	0	0	0	0	0	0	0	0	0	0	0	0	8.71748e-05	0	0	0	0	0	0	0	0	0	0	0	0	0	0	0	0	0	0	0	0	0	0	0	k__Bacteria;p__Proteobacteria;c__Gammaproteobacteria;o__Cellvibrionales;f__Halieaceae;g__OM60(NOR5)_clade;s__
OTU_807	0	0	0	0	0	0	0	0	5.23049e-05	3.48699e-05	0	0	0	0	0	0	0	5.23049e-05	0	0	0	0	0	3.48699e-05	0	0	3.48699e-05	3.48699e-05	0	0	0	0	0	0	0	0	k__Bacteria;p__unidentified_Bacteria;c__unidentified_Bacteria;o__Gemmatimonadales;f__Gemmatimonadaceae;g__;s__
OTU_808	0	0	0	1.7435e-05	0	0	0	0	0	5.23049e-05	0	0	0	0	0	0	0	0	0	0	0	0	0	0	0.000191785	0	0	3.48699e-05	0	0	0	0	0	0	0	0	k__Bacteria;p__Myxococcota;c__Polyangia;o__Haliangiales;f__Haliangiaceae;g__Haliangium;s__
OTU_809	0.000226655	0.000331264	0.000331264	0.000366134	0.000470744	0.000331264	0.000505614	0.000418439	0.000453309	0.00020922	0.000662529	0.000313829	0.000313829	0.000557919	0.000679964	0.00024409	0.000557919	0.000331264	0.000627659	0.000592789	0.000540484	0.000557919	0.000523049	0.000645094	0.000575354	0.000749704	0.000540484	0.00024409	6.97399e-05	0.000261525	8.71748e-05	0.000156915	0.000278959	0.000679964	0.000435874	0.000488179	k__Bacteria;p__Proteobacteria;c__Gammaproteobacteria;o__Enterobacterales;f__Enterobacteriaceae
OTU_810	0	0	0	0	0	0	0	0	0	0	0	0	0	0	0	0	0	0	0	0	0	0	0	0	0	0	0	5.23049e-05	0	0	0	0	0	8.71748e-05	0	0	k__Bacteria;p__Bacteroidota;c__Bacteroidia;o__Chitinophagales;f__Chitinophagaceae;g__Sediminibacterium;s__
OTU_811	0	0	0	0	0	0	0	0	0	0	0	0.00010461	0	0	0	0	0	0	0	0	0	0	0	6.97399e-05	0	0	0	0	0	1.7435e-05	0	0	0	0	0	3.48699e-05	k__Bacteria;p__Proteobacteria;c__Gammaproteobacteria;o__Xanthomonadales;f__Rhodanobacteraceae;g__Rudaea;s__
OTU_812	0	0	0	0	0	0	0	0	0	0	0	0	0	0	0	0	1.7435e-05	0	0	0	0	0	0	0	0	0	0	0	0	0	0	0.000156915	0	0	0	0	k__Bacteria
OTU_813	0	0	0	0	1.7435e-05	1.7435e-05	0	0	0	0	0	0	0	0	0	0	0	0	0	0	0	0	0	0	0	0	5.23049e-05	0	0	0	0	0	0	0	0	0	k__Bacteria;p__unidentified_Bacteria;c__unidentified_Bacteria;o__Gemmatimonadales;f__Gemmatimonadaceae;g__;s__
OTU_814	0	0	0	0	0	0	0	0	0	1.7435e-05	0	0	0	0	0	0	0	0	0	0	0	0	0	0	0.00013948	0	0	0	0	0	8.71748e-05	0	0	6.97399e-05	0	0	k__Bacteria;p__Actinobacteriota;c__Actinobacteria;o__PeM15;f__;g__;s__
OTU_815	0	1.7435e-05	0	0	0	3.48699e-05	0	0	0	0	0.00020922	0	0	0	0	0	6.97399e-05	0	0	0	0	0	0	0	0	0	1.7435e-05	0	0	3.48699e-05	0	1.7435e-05	0	0	0.00017435	1.7435e-05	k__Bacteria
OTU_816	0	0	0	0	1.7435e-05	6.97399e-05	0	0	0	0	5.23049e-05	0	0	0	0	0	0	0	0	0	0	0	0	0	0	0	1.7435e-05	0	0	0	0	0	0	0	3.48699e-05	0	k__Bacteria;p__Armatimonadota;c__Fimbriimonadia;o__Fimbriimonadales;f__Fimbriimonadaceae;g__;s__
OTU_817	0	0	0	0	0	0	0	0	0	0	3.48699e-05	0	0	0	0	0	0	0	0	3.48699e-05	0	0	0	0	0	0	0	0	0	0	0	0	0	0	0.00017435	0	k__Bacteria;p__Bacteroidota;c__Bacteroidia;o__Bacteroidales;f__Muribaculaceae;g__;s__
OTU_818	0	0	0	0	0	0	0	1.7435e-05	0.00010461	0	0	0	0	0	0	0	0	0	0	0	0	8.71748e-05	0	0	0	0	0	0	0	0	0	0	0	0	0	0	k__Bacteria;p__Firmicutes;c__Clostridia;o__Clostridiales;f__Clostridiaceae;g__Candidatus_Arthromitus
OTU_819	0	0	0	0	1.7435e-05	0	0	0	0	0	0	3.48699e-05	0	0	0	0	1.7435e-05	6.97399e-05	0	1.7435e-05	1.7435e-05	0	0	3.48699e-05	0	3.48699e-05	0.00010461	0	1.7435e-05	1.7435e-05	0	8.71748e-05	0	0	0	0	k__Bacteria;p__unidentified_Bacteria;c__Alphaproteobacteria;o__Rhodospirillales;f__Rhodospirillaceae;g__;s__
OTU_820	0	0	0	0	0	0	0	0	0	0	0	0	8.71748e-05	0	0	0	0	0	0	0	0	0	0	0	0	0	0	0	0	0	0	0	0	0	0	0	k__Bacteria;p__unidentified_Bacteria;c__unidentified_Bacteria;o__Gemmatimonadales;f__Gemmatimonadaceae;g__;s__
OTU_821	0	0	0	0	0	0	0	0	0	1.7435e-05	0	0	0	0	0	0	0	0	0	0	0	0	0	0	0.00013948	0	0	0.00017435	0	0	1.7435e-05	0	0	1.7435e-05	0	0	k__Bacteria;p__Proteobacteria;c__Gammaproteobacteria;o__Competibacterales;f__Competibacteraceae;g__Candidatus_Competibacter;s__
OTU_822	0	0	0	0	0	0	0	8.71748e-05	0.00013948	0	6.97399e-05	0	0	0	0	0	0	0	0	0	0	0	0	0	0	0	0	0	0	0	0	0	0	0	1.7435e-05	0	k__Bacteria;p__Bacteroidota;c__Bacteroidia;o__Bacteroidales;f__Tannerellaceae;g__Parabacteroides
OTU_823	0	0	0	0	0	0	0	8.71748e-05	0.00010461	0	0	0	0	0	0	0	0	0	0	0	0	0	0	0	0	0	0	0	0	0	0	0	0	0	0	0	k__Bacteria;p__unidentified_Bacteria;c__Clostridia;o__Lachnospirales;f__Lachnospiraceae;g__unidentified_Lachnospiraceae;s__Clostridium_sp_Culture-27
OTU_824	0	1.7435e-05	0	0	0	6.97399e-05	0	0	0	0	0	0	0	1.7435e-05	0	0	0	0	0	0	0	0	0	0	0	0	0.00013948	0	0	0	0	0	0	0	0	0	k__Bacteria;p__Proteobacteria;c__Gammaproteobacteria;o__Xanthomonadales;f__Xanthomonadaceae;g__Arenimonas
OTU_825	0	0	0	0	0	0	0	3.48699e-05	0.00017435	0	1.7435e-05	0	0	0	0	0	0	0	0	0	0	0	0	0	0	0	0	0	0	0	1.7435e-05	0	0	0	3.48699e-05	0	k__Bacteria;p__Firmicutes;c__Clostridia;o__Lachnospirales;f__Lachnospiraceae;g__Blautia;s__Lachnospiraceae_bacterium_28-4
OTU_826	0	0	0	0	0	0	0	0.000156915	0.000191785	0	0	0	0	0	0	0	0	0	0	0	0	0	0	0	0	0	0	0	0	0	0	0	3.48699e-05	0	0	0	k__Bacteria;p__Firmicutes;c__Clostridia;o__Oscillospirales;f__Ruminococcaceae;g__;s__
OTU_827	0	0	0	0	0	0	0	0.000122045	3.48699e-05	0	0	0	0	0	0	5.23049e-05	0	0	0	0	0	0	0	0	0	0	0	0	0	0	0	0	0	0	0	0	k__Bacteria;p__Firmicutes;c__Bacilli;o__Erysipelotrichales;f__Erysipelotrichaceae
OTU_828	0	0.00010461	1.7435e-05	0	0	0	0	0	0	0	0	0	0	5.23049e-05	0	0	1.7435e-05	0	0	0	0	0	0	0	0	0	0	0	0	0	0	1.7435e-05	5.23049e-05	0	0	0	k__Bacteria;p__Bdellovibrionota;c__Oligoflexia;o__0319-6G20;f__;g__;s__
OTU_829	0	0	0	0	0	0	0	0	0	0	0	0	0	0	0	0	0	0	0	1.7435e-05	0	0	0	0	0	0	0	0	0	1.7435e-05	0	0.00020922	0	0	0	0	k__Bacteria;p__Bacteroidota;c__Bacteroidia;o__Sphingobacteriales;f__Sphingobacteriaceae;g__Pedobacter
OTU_830	0	1.7435e-05	0	0	3.48699e-05	3.48699e-05	0	0	0	0	3.48699e-05	0	0.00024409	0	0	0	0	3.48699e-05	0	0	0	0	0	1.7435e-05	0	0	0	0	0	0	0	0	0	0	3.48699e-05	0	k__Bacteria;p__Proteobacteria;c__Gammaproteobacteria;o__CCD24;f__;g__;s__
OTU_831	0	0	1.7435e-05	0	0	0	0	0	0	3.48699e-05	0	0	0	0	3.48699e-05	0	0.000122045	1.7435e-05	0	1.7435e-05	0	0	0	8.71748e-05	1.7435e-05	5.23049e-05	1.7435e-05	0	0	0	0	0	0	0	0	0	k__Bacteria;p__Actinobacteriota;c__Actinobacteria;o__Micrococcales;f__Dermabacteraceae;g__Brachybacterium;s__Brachybacterium_paraconglomeratum
OTU_832	0	0	0	0	0	0	0	0	0	3.48699e-05	6.97399e-05	0	3.48699e-05	0	0	0	0	0	0	0	0	0	0	5.23049e-05	0	0	0	0	0	0	0	0	1.7435e-05	0	1.7435e-05	0	k__Bacteria;p__Proteobacteria;c__Alphaproteobacteria;o__Rhizobiales;f__Hyphomicrobiaceae;g__Hyphomicrobium;s__
OTU_833	0	0	0	0	0	0	0	0	0	0	0	1.7435e-05	0	0	0	0	0	0	0	0	0	0	0	0.000191785	0	0	1.7435e-05	0	0	0	0	0	0	0	0	0	k__Bacteria;p__unidentified_Bacteria;c__Saccharimonadia;o__Saccharimonadales;f__LWQ8;g__;s__
OTU_834	0	0	0	0	0	0	0	1.7435e-05	0	0	6.97399e-05	0	0	0	0	0	0	0	0	8.71748e-05	0	0	0	0	0	0	0	0	0	0	0	0	0	0	8.71748e-05	0	k__Bacteria;p__unidentified_Bacteria;c__Desulfovibrionia;o__Desulfovibrionales;f__Desulfovibrionaceae;g__;s__
OTU_835	0	0	0	0	0	0	0	0	0	0	0	0	0	0	0	0	1.7435e-05	0.00013948	0	0	0	0	0	0	0	0	0	0	0	0	0	0	0	0	0	0	k__Bacteria;p__Myxococcota;c__Polyangia;o__Blfdi19;f__;g__;s__
OTU_836	0	3.48699e-05	1.7435e-05	0	1.7435e-05	6.97399e-05	0	0	0	0	0	5.23049e-05	0	1.7435e-05	1.7435e-05	0	0	0	0	5.23049e-05	0	0	0	0	0	6.97399e-05	5.23049e-05	0	0	0	0	1.7435e-05	0	0	0.00010461	8.71748e-05	k__Bacteria;p__unidentified_Bacteria;c__Acidimicrobiia;o__;f__;g__;s__
OTU_837	0	0	0	6.97399e-05	0	0	0	0	0	0	0	0	0	0	0	0	0	0	0	0	0	0	0	0	0	0	0	0	0	0	0	0	0	0	0	0	k__Bacteria
OTU_838	0	0	0	0	0	0	0	0	0	0	0	0	0	0	0	0	0	0	0	0.000122045	0	0	0	0	0	0	0	0	0	0	0	0	0	0	0	0	k__Bacteria;p__Bacteroidota;c__Bacteroidia;o__Chitinophagales;f__Chitinophagaceae;g__Aurantisolimonas;s__
OTU_839	0	1.7435e-05	0	0	0	0	0	0	0	0	8.71748e-05	1.7435e-05	0	0	0	0	0	0	0	0	5.23049e-05	0	0	1.7435e-05	0	0	0	0	0	0	0	3.48699e-05	0	0	1.7435e-05	0	k__Bacteria;p__Proteobacteria;c__Alphaproteobacteria;o__Rhizobiales;f__unidentified_Rhizobiales;g__Bauldia;s__
OTU_840	0	0	0.000122045	0	0	0	0	0	0	0	0	0	0	0	5.23049e-05	0	0	0	0	0	0	0	0	0	3.48699e-05	0	0	0	3.48699e-05	0	0	0	0	0	0	1.7435e-05	k__Bacteria;p__Proteobacteria;c__Gammaproteobacteria;o__R7C24;f__;g__;s__
OTU_841	0	0	0	0	0	0	0	0.000122045	0	0	0	0	0	0	0	0	0	0	0	0	0	0	0	0	0	0	0	5.23049e-05	0	0	0	0	0	0	0	0	k__Bacteria;p__Firmicutes;c__Clostridia;o__Lachnospirales;f__Lachnospiraceae
OTU_842	0	0	0	0	0	0	0	0	0	0	0	0	0	0	5.23049e-05	0	5.23049e-05	0	0	0	1.7435e-05	0	0	0	0	0	0	0	0	1.7435e-05	0	0	0	0	0	0	k__Bacteria;p__Proteobacteria;c__Gammaproteobacteria;o__Legionellales;f__Legionellaceae;g__Legionella
OTU_843	0	0	0	0	0	0	0	0	0	0	0	0	0	0	0	0	0	0	0	0	0	0	0	0	0.000156915	0	0	0	0	0	0	0	0	0	0	0	k__Bacteria;p__Firmicutes;c__Clostridia;o__Oscillospirales;f__UCG-010;g__;s__
OTU_844	0	0	0	0	0	0	0	0	0	0	3.48699e-05	0	0	0	0	0	3.48699e-05	0	0	0	0	0	1.7435e-05	0	0	0	8.71748e-05	0	0	0	0	0	0	0	1.7435e-05	0	k__Bacteria;p__Proteobacteria;c__Alphaproteobacteria;o__Rhizobiales;f__unidentified_Rhizobiales;g__Nordella;s__Nordella_oligomobilis
OTU_845	0	0	0	0	0	0	0	0	0	0	0	0	0	0	0	0	0	0	0	0.000122045	0	0	0	0	0	0	0	0	0	0	0	0	0	0	0	0	k__Bacteria;p__Chloroflexi
OTU_846	1.7435e-05	0	0	0	0	0	6.97399e-05	0	0	0	0	0	0	0	0	0	0	0	0	0	0	0	0	0	8.71748e-05	0	0	0	0	0	0	0	0	0	0	0	Unknown
OTU_847	0	6.97399e-05	0	0	0	6.97399e-05	0	0	0	0	5.23049e-05	1.7435e-05	1.7435e-05	0	0	0	0	0	0	0	0	0	0	0	0	0	5.23049e-05	0	0	0	0	0	1.7435e-05	0	1.7435e-05	1.7435e-05	k__Bacteria;p__Acidobacteriota;c__Vicinamibacteria;o__Vicinamibacterales;f__Vicinamibacteraceae;g__;s__
OTU_848	0	0	0	0	0	0	0	0	0	0	3.48699e-05	0.000122045	0	0	0	0	0	0	0	0	0	0	0	0	0	3.48699e-05	0	0	0	0	0	1.7435e-05	0	0	0	0	k__Bacteria;p__Proteobacteria;c__Gammaproteobacteria;o__unidentified_Gammaproteobacteria;f__unidentified_Gammaproteobacteria;g__Acidibacter
OTU_849	0	0	1.7435e-05	0	0	0	0	0	0	0	0	0	0	0	8.71748e-05	0	0	0	0	0	0	0	0	0	0	0	0	0	0	0	0	0	0	0	0	0	k__Bacteria;p__Proteobacteria;c__Gammaproteobacteria;o__Xanthomonadales;f__Rhodanobacteraceae;g__Chiayiivirga;s__
OTU_850	0	0	0	0	0	1.7435e-05	0	0	0	3.48699e-05	0	0.000156915	0	0	8.71748e-05	0	0	0	0	0	0	5.23049e-05	0	5.23049e-05	0	0	3.48699e-05	0	0	0	1.7435e-05	0	0	0	1.7435e-05	5.23049e-05	k__Bacteria;p__unidentified_Bacteria;c__Thermoleophilia;o__Gaiellales;f__;g__;s__
OTU_851	0	0	0	0	0	0	0	0	0	0	0	0	0	0	0.00010461	0	0	0	0	0	0	0	0	0	0	0	0	0	0	0	0	0	0	0	0	0	k__Bacteria;p__Chloroflexi;c__Chloroflexia;o__Thermomicrobiales;f__Thermomicrobiaceae;g__Nitrolancea;s__
OTU_852	0	0	0	0	0	0	0	0	0	0	0	0	0	0	0	0	5.23049e-05	0.00017435	0	1.7435e-05	0	0	0	0	3.48699e-05	0	0	5.23049e-05	0	0	3.48699e-05	6.97399e-05	0	1.7435e-05	0	0	k__Bacteria;p__Myxococcota;c__Polyangia;o__Haliangiales;f__Haliangiaceae;g__Haliangium;s__
OTU_853	0	0	0	0	0	0	0	0	0	0	0	0	8.71748e-05	0	0	0	0	0	0	0	0	0	0	0	0	0	0	0	0	0	0	0	0	0	0	0	k__Bacteria;p__Proteobacteria;c__Gammaproteobacteria;o__Nitrosococcales;f__Methylophagaceae;g__Methylophaga
OTU_854	0	0.000226655	0	0	0	1.7435e-05	0	0	0	0	3.48699e-05	0.000156915	0	0.000226655	1.7435e-05	0	0	0	0	8.71748e-05	0	0	0	0	0	0	6.97399e-05	0	0	5.23049e-05	0	0	1.7435e-05	0	0	0.000122045	k__Bacteria;p__Proteobacteria;c__Gammaproteobacteria;o__Burkholderiales;f__Oxalobacteraceae;g__Massilia
OTU_855	0	0	0	0	0	0	0	5.23049e-05	5.23049e-05	0	0	0	0	0	0	0	8.71748e-05	0	1.7435e-05	0	0	0	0	0	0	0	0	0	0	0	0	0	0	0	0	0	k__Bacteria;p__unidentified_Bacteria;c__Clostridia;o__Oscillospirales;f__Oscillospiraceae;g__;s__
OTU_856	0	0	0	0	0	3.48699e-05	0	0	0	0	0	3.48699e-05	0	6.97399e-05	0	0	0	0	0	0	0	0	0	0	0	1.7435e-05	1.7435e-05	0	0	0	0	6.97399e-05	0	0	0	0	k__Bacteria;p__Acidobacteriota;c__Vicinamibacteria;o__Vicinamibacterales;f__Vicinamibacteraceae;g__;s__
OTU_857	0	0	0	0	0	1.7435e-05	0	0	0	0	0	0	0	0	0	0	0	0	0	0	0	0	0	0	0	0	0	0	5.23049e-05	0	0	8.71748e-05	3.48699e-05	0	0	0	k__Bacteria;p__unidentified_Bacteria;c__Alphaproteobacteria;o__Rhodospirillales;f__;g__;s__
OTU_858	0	0	0	0	0	0	0	0	0	0	3.48699e-05	0	0	0	0	0	0	0	0	0	0	0	0	0	0	0	0	0	0	0	0	0	0	0	0.00010461	0	k__Bacteria;p__Firmicutes;c__Clostridia;o__Oscillospirales;f__[Eubacterium]_coprostanoligenes_group;g__;s__
OTU_859	0	0	0	0	0	0	0	5.23049e-05	6.97399e-05	0	0	0	0	0	0	0	0	0	5.23049e-05	0	0	0	0	0	0	0	0	0	0	0	0	0	0	0	0	0	k__Bacteria
OTU_860	0	0.00013948	0	0	0	0	0	0	0	0	0	0	0	5.23049e-05	0	0	0	0	0	0	0	0	0	0	0	0	0	0	0	0	0	0	0	0	0	0	k__Bacteria;p__Chloroflexi;c__Chloroflexia;o__Chloroflexales;f__Herpetosiphonaceae;g__Herpetosiphon;s__
OTU_861	0	0	0	0	0	0	0	0	0	0	8.71748e-05	0	1.7435e-05	0	1.7435e-05	0	8.71748e-05	0	0	0	0	0	0	0	0	0	0	0	0	0	0	0	0	0	3.48699e-05	0	k__Bacteria;p__Proteobacteria;c__Alphaproteobacteria;o__Caulobacterales;f__Hyphomonadaceae;g__SWB02;s__
OTU_862	0	0	0	0.00013948	0	0	1.7435e-05	0	0	0	0	0	0	0	0	0	0	0	0	0	0	0	0	0	0	0	0	0	0	0	0	0	0	0	0	0	k__Bacteria;p__Proteobacteria
OTU_863	0	0	5.23049e-05	0	5.23049e-05	0	0	0	0	0	0	0	0	1.7435e-05	0	0	0	0	0	0.000122045	0	0	0	1.7435e-05	0	5.23049e-05	0	0	0	0	0	5.23049e-05	0	0	6.97399e-05	0	k__Bacteria;p__Bacteroidota;c__Bacteroidia;o__Chitinophagales;f__Chitinophagaceae;g__Puia;s__
OTU_864	0	0	0	5.23049e-05	0	0	0	0	0	0	0	0	0	0	0	0	0	0	0	0	0	0	0	0	8.71748e-05	0	0	8.71748e-05	0	0	0	0	0	0	0	0	k__Bacteria;p__Chloroflexi;c__Chloroflexia;o__Thermomicrobiales;f__AKYG1722;g__;s__
OTU_865	0	0	0	0	6.97399e-05	0	0	0	0	0	0	0	0	0	0	0	0	0	0	0	0	0	0	5.23049e-05	0	3.48699e-05	0	0	0	0	0	0	0	0	0	0	k__Bacteria;p__Proteobacteria;c__Gammaproteobacteria;o__Xanthomonadales;f__Rhodanobacteraceae
OTU_866	0	3.48699e-05	0	0	1.7435e-05	0	0	0	0	0	0	0	0	0.000191785	0	0	3.48699e-05	0.000156915	0	0	0	0	0	0	0	1.7435e-05	0	0	0	0	0	0	0	0	0	1.7435e-05	k__Bacteria;p__Proteobacteria;c__Gammaproteobacteria;o__Xanthomonadales;f__Xanthomonadaceae;g__Arenimonas
OTU_867	0	1.7435e-05	0	0	0	0	0	0	0	0	1.7435e-05	1.7435e-05	3.48699e-05	0	0	0	0	1.7435e-05	0	0	3.48699e-05	0	0	5.23049e-05	0	0	0	0	0	0	0	0	1.7435e-05	0	0	0	k__Bacteria;p__Proteobacteria;c__Alphaproteobacteria;o__Rhizobiales;f__Hyphomicrobiaceae;g__Hyphomicrobium;s__
OTU_868	0	0	0	0	0	0	0	0	0	0	0	0	0	0	0	0	0	0	0	0	0.00013948	0	0	0	1.7435e-05	0	0	0	0	0	0	0	0	0	0	0	k__Bacteria;p__Chloroflexi;c__Chloroflexia;o__Thermomicrobiales;f__JG30-KF-CM45;g__;s__
OTU_869	0	0	0	0	0	0	0	0	0	0	0	0	0	0	0	0	0	6.97399e-05	0	0	0	0	0	0	0	0	0	0	0	0	0	0	0	0	0	0	k__Bacteria
OTU_870	0	0	0	0	0	0	0	0	0	0	3.48699e-05	0	0	0	0	0	3.48699e-05	6.97399e-05	0	1.7435e-05	0	0	0	0	0	3.48699e-05	5.23049e-05	0	0	0	0	0	0	6.97399e-05	0	0	k__Bacteria;p__Bacteroidota;c__Bacteroidia;o__Cytophagales;f__Spirosomaceae;g__Emticicia
OTU_871	0	0	0	1.7435e-05	0	0	0	1.7435e-05	0	0	0	0	0	0	0	0	0	0	0	0	0	0	0	0	5.23049e-05	0	0	0	0	0	0	0	0	5.23049e-05	0	0	k__Bacteria
OTU_872	0	0	0	0	0	0	0	8.71748e-05	0	0	0	0	0	0	0	0	0	0	0	0	0	0	0	0	0	0	0	0	0	0	0	0	0	0	0	0	k__Bacteria;p__Desulfobacterota;c__Desulfovibrionia;o__Desulfovibrionales;f__Desulfovibrionaceae;g__Desulfovibrio;s__Desulfovibrio_sp_enrichment_culture_clone_Jdgsrb034
OTU_873	0	0	0	0	0	0	0	0	0	0	0	0	0	0	0	0	5.23049e-05	0	0	0.00010461	0	0	0	0	0	0	0	0	0	0	0	0	0	0	0	0	k__Bacteria
OTU_874	0	3.48699e-05	5.23049e-05	0	0	3.48699e-05	0	0	0	0	0	0	0	1.7435e-05	3.48699e-05	0	3.48699e-05	0.000122045	0	1.7435e-05	5.23049e-05	0	0	3.48699e-05	0	1.7435e-05	0	0	0	1.7435e-05	0	5.23049e-05	0	0	8.71748e-05	1.7435e-05	k__Bacteria;p__Verrucomicrobiota;c__Verrucomicrobiae;o__Opitutales;f__Opitutaceae;g__Lacunisphaera;s__
OTU_875	3.48699e-05	0	0	0	0	0	0	0	0	0	0	0	0	0	0	0	0	0	0	0	0	0	0	0	5.23049e-05	0	0	0	0	0	0	0	0	0	0	0	k__Bacteria;p__Acidobacteriota;c__Acidobacteriae;o__unidentified_Acidobacteriae;f__unidentified_Acidobacteriae;g__Paludibaculum;s__
OTU_876	0	1.7435e-05	1.7435e-05	0	3.48699e-05	0	0	0	0	0	0	0	0	1.7435e-05	0	0	0	0	0	0	0	0	0	0	0	0	0	0	0	0.000226655	0	0	0	0	0	0	k__Bacteria;p__Actinobacteriota;c__Actinobacteria;o__Frankiales;f__Geodermatophilaceae;g__Klenkia;s__
OTU_877	0	0	0	0	0	1.7435e-05	0	0	0	0	0	0	0	0	0	0	0	0	0	0	8.71748e-05	0	0	0	0	0	0	0	0	6.97399e-05	0	0	0	0	0	0	k__Bacteria;p__Planctomycetota;c__Phycisphaerae;o__Tepidisphaerales;f__WD2101_soil_group;g__;s__
OTU_878	0	0	0	0	0	0	0	8.71748e-05	5.23049e-05	0	0	0	0	0	0	0	0	0	5.23049e-05	0	0	0	0	0	0	0	0	0	0	0	0	0	0	0	0	0	k__Bacteria
OTU_879	0	6.97399e-05	1.7435e-05	0	0	0	0	0	0	0	6.97399e-05	5.23049e-05	0	5.23049e-05	0	0	1.7435e-05	0	0	0	0	0	0	0	0	0	1.7435e-05	0	0	0	0	0	0	0	3.48699e-05	0	k__Bacteria;p__Actinobacteriota;c__Actinobacteria;o__Pseudonocardiales;f__Pseudonocardiaceae;g__Saccharopolyspora;s__Saccharopolyspora_sp
OTU_880	0	0	0	0	0	0	0	0.00010461	0	0	0	0	0	0	0	0	0	0	0	0	0	0	0	0	0	0	0	0	0	0	0	0	0	0	0	0	k__Bacteria;p__Firmicutes;c__Bacilli;o__Staphylococcales;f__Staphylococcaceae;g__Salinicoccus;s__
OTU_881	0	0	0	0	0	0	0	0	0	0	0	0	0	0	0	0	0	0	0	0	0	0	0	0	5.23049e-05	0	0	1.7435e-05	0	0	0	0	0	0	0	0	k__Bacteria;p__Proteobacteria;c__Gammaproteobacteria;o__Competibacterales;f__Competibacteraceae;g__Candidatus_Competibacter;s__
OTU_882	0	3.48699e-05	0	0	0	0	0	0	0	0	0	0	0	0	0	0	3.48699e-05	1.7435e-05	0	0	0	0	0	0	0	0	0	0	0	0	0	0	0	0	0	0	k__Bacteria;p__unidentified_Bacteria;c__Alphaproteobacteria;o__Azospirillales;f__Azospirillaceae;g__;s__
OTU_883	0	3.48699e-05	3.48699e-05	0	5.23049e-05	0	0	0	0	0	0	0	0	0.00013948	6.97399e-05	0	6.97399e-05	1.7435e-05	0	3.48699e-05	0	0	8.71748e-05	0	0	0	5.23049e-05	0	0	0	0	0	0	0	5.23049e-05	0	k__Bacteria;p__Proteobacteria;c__Gammaproteobacteria;o__Xanthomonadales;f__Xanthomonadaceae;g__Arenimonas;s__
OTU_884	0	0	0	0	0	0	1.7435e-05	0	0	3.48699e-05	0	0	0	0	0	0	0	0	0	0	0	0	0	0	1.7435e-05	0	0	0	0	0	0	0	0	0	0	0	k__Bacteria;p__Firmicutes;c__Clostridia;o__Oscillospirales;f__[Eubacterium]_coprostanoligenes_group;g__;s__
OTU_885	0	0	0	0	0	0	0	0.000122045	0	0	0	0	0	0	0	0	0	0	0	0	0	0	0	0	0	0	0	0	0	0	0	0	0	0	0	0	k__Bacteria
OTU_886	0	0	0	0	5.23049e-05	0	0	0	0	0	0	0	0	0	0	0	5.23049e-05	0	0	1.7435e-05	0	0	0	0	0	5.23049e-05	0	0	0	0	0	0	0	0	0	0	k__Bacteria;p__Proteobacteria;c__Gammaproteobacteria;o__Burkholderiales;f__A21b;g__;s__
OTU_887	0	0	0	0	0	0	0	0	0	0	5.23049e-05	0	0	0	0	0	0	1.7435e-05	0	0	0	0	0	0	0	0	0	0	0	0	0	3.48699e-05	0	0	3.48699e-05	0	k__Bacteria;p__Proteobacteria;c__Alphaproteobacteria;o__Caulobacterales;f__Hyphomonadaceae;g__SWB02;s__
OTU_888	0	0	0	0	0	0	0	0.00010461	0.000226655	0	0	0	0	0	0	1.7435e-05	0	0	3.48699e-05	0	0	0	0	0	0	0	0	0	0	0	0	0	0	0	0	0	k__Bacteria
OTU_889	0	0	0	0	0	0	0	0	0	0	0	0	0	0	0	0	0	0	0	0	0	0	0	0	0	0	0	6.97399e-05	0	0	0	0	0	0	0	0	k__Bacteria
OTU_890	0	0	0	0	0	0	0	0	0	0	0	0	0	0	0	0	0	0	0	0	0	0	0	0	0	0	0	0	0	0	0	0	0	0.000156915	0	0	k__Bacteria
OTU_891	0	0	0	0	0	0	0	8.71748e-05	0.000261525	0	0	0	0	0	0	0	0	0	0	0	0	3.48699e-05	0	0	0	0	0	0	0	0	0	0	0	0	0	0	k__Bacteria;p__Firmicutes;c__Clostridia;o__Clostridia_UCG-014;f__;g__;s__
OTU_892	0	1.7435e-05	0	0	0	0	0	0	0	0	0	0	0	0	0	0	3.48699e-05	1.7435e-05	0	1.7435e-05	1.7435e-05	0	3.48699e-05	5.23049e-05	0	0	0	0	1.7435e-05	6.97399e-05	0	0.000261525	0	0	1.7435e-05	0	k__Bacteria;p__unidentified_Bacteria;c__Bacteroidia;o__Chitinophagales;f__Chitinophagaceae;g__;s__
OTU_893	0	0	0	0	0	0	0	0	6.97399e-05	0	0	0	0	0	0	0	0	0	0	0	0	0	0	0	0	0	0	0	0	0	0	0	0	0	0	0	Unknown
OTU_894	3.48699e-05	0	0	0	0	0	0	0	0	0	0	0	0	0	0	1.7435e-05	0.00010461	6.97399e-05	0	6.97399e-05	1.7435e-05	0	0	3.48699e-05	0	0	0	1.7435e-05	0	0	0	0	0	0	0	0	k__Bacteria;p__Actinobacteriota;c__Actinobacteria;o__Micrococcales;f__Demequinaceae;g__Demequina;s__
OTU_895	0	0	0	0	0	3.48699e-05	0	0	0	0	0	0	5.23049e-05	0	0	0	8.71748e-05	6.97399e-05	0	0	0	0	1.7435e-05	0	0	1.7435e-05	3.48699e-05	0	0	0	0	0	0	0	1.7435e-05	0	k__Bacteria;p__Cyanobacteria;c__Cyanobacteriia;o__Chloroplast;f__unidentified_Chloroplast;g__unidentified_Chloroplast
OTU_896	0	0	0	0	0	0	0	0	0	0	0	0	5.23049e-05	0	0	0	5.23049e-05	5.23049e-05	0	0	1.7435e-05	0	0	0	0	0	6.97399e-05	0	0	0	0	0	0	0	0	0	k__Bacteria;p__unidentified_Bacteria;c__Alphaproteobacteria;o__Reyranellales;f__Reyranellaceae;g__;s__
OTU_897	0	0	3.48699e-05	0	0	0	0	0	0	0	1.7435e-05	1.7435e-05	0	1.7435e-05	0	0	1.7435e-05	0.00010461	0	3.48699e-05	1.7435e-05	0	0	6.97399e-05	0	3.48699e-05	0	0	3.48699e-05	0	0	0	0	0	0	1.7435e-05	k__Bacteria;p__Proteobacteria;c__Alphaproteobacteria;o__Rhizobiales;f__Beijerinckiaceae
OTU_898	0	0	0	0	1.7435e-05	0	0	0	0	0	5.23049e-05	0	0	3.48699e-05	0	0	0	0	0	0	0	0	0	0	0	1.7435e-05	0	0	0	0	0	0	1.7435e-05	0	6.97399e-05	0	k__Bacteria;p__Myxococcota;c__Polyangia;o__Haliangiales;f__Haliangiaceae;g__Haliangium;s__
OTU_899	0	0	0	0	0	0	0	0	0	0	0	0	0	1.7435e-05	3.48699e-05	0	0	0	0	0	0	0	0	5.23049e-05	0	0	0	0	0	0	0	0.000156915	0	0	0	0	k__Bacteria;p__Bacteroidota;c__Bacteroidia;o__Chitinophagales;f__Chitinophagaceae;g__Segetibacter;s__
OTU_900	0	0	0	0	0	0	0	0	0	0	0	0	0	0	0	0	0.00020922	8.71748e-05	0	0	0	0	0	0	0	0	0	0	0	0	0	0	0	0	0	0	k__Bacteria;p__Proteobacteria;c__Gammaproteobacteria;o__Cellvibrionales;f__Cellvibrionaceae;g__Cellvibrio;s__
OTU_901	0	0	0	0	0	0	0	0	0	0	5.23049e-05	0	0	0	0	0	0	8.71748e-05	0	0	6.97399e-05	0	0	6.97399e-05	0	3.48699e-05	0	0	0	3.48699e-05	0	6.97399e-05	0	0	1.7435e-05	1.7435e-05	k__Bacteria;p__Myxococcota;c__Polyangia;o__Polyangiales;f__Polyangiaceae;g__Pajaroellobacter;s__
OTU_902	0	0	0	0	0	0	0	0	0	6.97399e-05	0	0	0	0	0	0	8.71748e-05	0	0	0	0	0	0	0	0	0	0	6.97399e-05	0	0	0	3.48699e-05	0	0	0	0	k__Bacteria
OTU_903	0	0	0	0	0	0	0	0	0	0	0	6.97399e-05	0	0	0	0	3.48699e-05	3.48699e-05	0	0	1.7435e-05	0	0	0	0	0	0	0	0	0	0	5.23049e-05	0	0	0	0	k__Bacteria;p__unidentified_Bacteria;c__Gammaproteobacteria;o__Diplorickettsiales;f__Diplorickettsiaceae;g__;s__
OTU_904	0	0	0	3.48699e-05	0	0	0	0	0	0	0	0	0	0	0	0	0	0	0	0	0	0	0	0	0	0	0	1.7435e-05	0	0	3.48699e-05	0	0	3.48699e-05	0	0	k__Bacteria;p__Bacteroidota;c__Bacteroidia;o__Chitinophagales;f__Chitinophagaceae;g__Sediminibacterium;s__
OTU_905	0.000122045	0	0	0.00010461	0	0	0.00017435	0	0	8.71748e-05	0	0	0	0	0	0	0	0	0	0	0	0	0	0	0.00017435	0	0	0.00013948	0	0	0.00020922	0	0	0.00024409	0	0	k__Bacteria;p__Proteobacteria;c__Gammaproteobacteria;o__Alteromonadales;f__Shewanellaceae;g__Shewanella;s__Shewanella_baltica
OTU_906	0	0	0	0	0	0	0	0.000191785	6.97399e-05	0	0	0	0	0	0	0	0	0	0	0	0	0	0	0	0	0	0	0	0	0	0	0	0	0	0	0	k__Bacteria;p__Bacteroidota;c__Bacteroidia;o__Bacteroidales;f__Muribaculaceae;g__;s__
OTU_907	0	6.97399e-05	5.23049e-05	0	5.23049e-05	0	0	0	0	0	0.000122045	8.71748e-05	0	5.23049e-05	5.23049e-05	0	0.000261525	0.000261525	0	1.7435e-05	1.7435e-05	0	0	0.00020922	0	3.48699e-05	0	0	0	1.7435e-05	0	0.000470744	0	0	6.97399e-05	1.7435e-05	k__Bacteria;p__Proteobacteria;c__Gammaproteobacteria;o__Xanthomonadales;f__Xanthomonadaceae;g__Arenimonas;s__
OTU_908	0	0	0	0	0	0	1.7435e-05	0	0	6.97399e-05	0	0	0	0	0	0	0	0	0	0	0	0	0	0	1.7435e-05	0	0	3.48699e-05	0	0	1.7435e-05	0	0	0	0	0	k__Bacteria
OTU_909	0	0	0	0	0	0	0	0	0	0	0	0	0	0	0	0	0	0	0	0	0	0	0	0	0	0	0	0.00010461	0	0	0	0	0	0	0	0	Unknown
OTU_910	0	0	0	0	0	0	0	5.23049e-05	5.23049e-05	0	0	0	0	0	0	0	0	0	0	0	0	0	0	0	0	0	0	0	0	0	0	0	0	0	0	0	k__Bacteria
OTU_911	0	6.97399e-05	3.48699e-05	0	5.23049e-05	5.23049e-05	0	0	0	0	3.48699e-05	1.7435e-05	0	0	1.7435e-05	0	5.23049e-05	1.7435e-05	0	3.48699e-05	0	0	0	0	0	1.7435e-05	5.23049e-05	0	0	0	0	0	0	0	0.00010461	5.23049e-05	k__Bacteria;p__Firmicutes;c__Bacilli;o__Bacillales;f__Planococcaceae;g__Lysinibacillus;s__
OTU_912	0	0	0	0	0	0	0	0	0	0	0	0	0	6.97399e-05	0	0	3.48699e-05	0.00013948	0	0	3.48699e-05	0	0	0	0	0	0	0	0	0	0	0	0	0	0	0	k__Bacteria;p__Proteobacteria;c__Gammaproteobacteria;o__Burkholderiales;f__Comamonadaceae;g__Comamonas;s__Comamonas_koreensis
OTU_913	0	0	0	0.00013948	0	0	0	0	0	0	0	0	0	0	0	0	0	0	0	0	0	0	0	0	0	0	0	5.23049e-05	0	0	0	0	0	0	0	0	k__Bacteria
OTU_914	0	3.48699e-05	3.48699e-05	0	3.48699e-05	5.23049e-05	0	0	0	0	0	8.71748e-05	0	6.97399e-05	3.48699e-05	0	0	5.23049e-05	0	3.48699e-05	1.7435e-05	0	1.7435e-05	3.48699e-05	0	0	1.7435e-05	0	1.7435e-05	1.7435e-05	0	0.00010461	0	0	0	0.00010461	k__Bacteria;p__Proteobacteria;c__Alphaproteobacteria;o__Rhizobiales;f__Beijerinckiaceae;g__Methylovirgula;s__
OTU_915	1.7435e-05	0	0	1.7435e-05	0	0	0	0	0	1.7435e-05	0	0	0	0	1.7435e-05	0	0.00017435	0	0	0	0	0	0	0	0	0	5.23049e-05	0	0	0	0	0	0	3.48699e-05	0	0	k__Bacteria;p__Gemmatimonadetes;c__unidentified_Gemmatimonadetes;o__Gemmatimonadales;f__Gemmatimonadaceae;g__Gemmatimonas;s__
OTU_916	0	0	0	0.00017435	0	0	0	0	0	0	0	0	0	0	0	0	0	0	0	0	0	0	0	0	0	0	0	0	0	0	0	0	0	0	0	0	Unknown
OTU_917	0	0	0	0	0	0	0	0	0	3.48699e-05	0	0	0	0	0	0	0	0	0	0	0	0	0	0	6.97399e-05	0	0	0	0	0	3.48699e-05	0	0	0	0	0	k__Bacteria;p__Myxococcota;c__Polyangia;o__Polyangiales;f__Polyangiaceae
OTU_918	0	1.7435e-05	0	0	0	0	0	0	0	0	0	0	0	0	1.7435e-05	0	0	0	0	0	0	0	5.23049e-05	0	0	0	0	0	0	0	0	1.7435e-05	6.97399e-05	0	0	0	k__Bacteria;p__Myxococcota;c__Polyangia;o__Polyangiales;f__Polyangiaceae;g__Pajaroellobacter;s__
OTU_919	0	1.7435e-05	0	0	0	0	0	0	0	0	1.7435e-05	3.48699e-05	0	0	0	0	0	0.000122045	0	0	0	0	0	0	0	0	0	0	0	0	0	0	0	0	0	0	k__Bacteria;p__Gemmatimonadetes;c__unidentified_Gemmatimonadetes;o__Gemmatimonadales;f__Gemmatimonadaceae;g__Gemmatimonas;s__bacterium_Ellin5290
OTU_920	0	0	0	5.23049e-05	0	0	0	0	0	0	0	0	0	0	0	0	0	0	0	1.7435e-05	0	0	0	0	0.00010461	0	0	0	0	0	0	0	0	0	0	0	k__Bacteria
OTU_921	0	0	0	0	0	0	0	0	0	0	3.48699e-05	3.48699e-05	0	0	0	0	1.7435e-05	0	0	0	0	0	0	0	0	0	0	0	0	0	0	5.23049e-05	0	0	0	1.7435e-05	k__Bacteria;p__Myxococcota;c__Polyangia;o__mle1-27;f__;g__;s__
OTU_922	0	0	0	0	0	0	0	0	0	0	0	0	1.7435e-05	0	0	0	0	0	0	0	1.7435e-05	0	0	0	0	0	0	0	0	3.48699e-05	0	0	0	0	0	0	k__Bacteria;p__Actinobacteriota;c__Acidimicrobiia;o__Microtrichales;f__Iamiaceae;g__Iamia;s__
OTU_923	0	0	1.7435e-05	0	0	0	0	0	0	0	0	8.71748e-05	0	0	1.7435e-05	0	0	0	0	0	0	0	0	0	0	0	0	0	0	0	0	0	0	0	0	0	k__Bacteria
OTU_924	0	6.97399e-05	0	0	0	1.7435e-05	0	0	0	0	0	0	0	0	0	0	1.7435e-05	3.48699e-05	0	8.71748e-05	0	0	0	5.23049e-05	0	0	0	0	0	0	0	0	0	0	0	0	k__Bacteria;p__Proteobacteria;c__Gammaproteobacteria;o__Burkholderiales;f__SC-I-84;g__;s__
OTU_925	1.7435e-05	0	0	0	0	0	0.000575354	0	0	0.00010461	0	0	0	0	0	0	0	0	0	0	0	0	0	0	0.00010461	0	0	0	0	0	3.48699e-05	0	0	0	0	0	k__Bacteria;p__Firmicutes;c__Clostridia;o__Oscillospirales;f__Ruminococcaceae;g__Subdoligranulum;s__
OTU_926	0	3.48699e-05	0	0	0	0	0	0	0	0	0	0	0	3.48699e-05	0	0	0	0	0	3.48699e-05	0	0	0	3.48699e-05	0	0	0	0	0	0	0	0.000156915	0	0	0	0	k__Bacteria;p__unidentified_Bacteria;c__Saccharimonadia;o__Saccharimonadales;f__Saccharimonadaceae;g__TM7a;s__
OTU_927	0	0	0	0	0	0	0	0.000488179	5.23049e-05	0	0	0	0	0	0	0	0	0	0	0	0	1.7435e-05	0	0	0	0	0	0	0	0	0	0	0	0	0	0	k__Bacteria;p__Bacteroidota;c__Bacteroidia;o__Bacteroidales;f__Muribaculaceae;g__;s__
OTU_928	0	0	0	0	0	0	0	0	0	0	0	0	0	0	0	0	0	5.23049e-05	0	0	0	0	0	0.00010461	0	0	0	0	0	1.7435e-05	0	0	0	0	0	1.7435e-05	k__Bacteria;p__Myxococcota;c__Polyangia;o__mle1-27
OTU_929	0	0	0	0	0	0	0	0	0	0	0	0	0	0	0	0.00010461	0	0	0	0	0	0	0	0	0	0	0	0	0	0	0	0	0	0	0	0	k__Bacteria;p__Actinobacteriota;c__Actinobacteria;o__Propionibacteriales;f__Nocardioidaceae;g__Nocardioides
OTU_930	0	0	1.7435e-05	0	3.48699e-05	8.71748e-05	0	0	0	0	1.7435e-05	6.97399e-05	0	1.7435e-05	0.00010461	0	0	0	0	5.23049e-05	0	0	0	0	0	0	1.7435e-05	0	0	0	0	0	0	0	0.00017435	5.23049e-05	k__Bacteria;p__unidentified_Bacteria;c__Alphaproteobacteria;o__Elsterales;f__;g__;s__
OTU_931	0	0	0	5.23049e-05	0	0	3.48699e-05	0	0	0	0	0	0	0	0	0	0	0.00020922	0	0	0	0	0	0	0	0	0	0	0	0	5.23049e-05	6.97399e-05	0	0	0	0	k__Bacteria;p__Proteobacteria;c__Gammaproteobacteria;o__Burkholderiales;f__Comamonadaceae;g__Aquabacterium;s__Aquabacterium_citratiphilum
OTU_932	0	0	0	0	0	0	0	3.48699e-05	0	0	0	0	0	0	0	0	0	0	0	0	0	0	0	0	0.000122045	0	0	0	0	0	0	0	0	0	0	0	k__Bacteria
OTU_933	0	0	0	0	0	0	0	0.000191785	3.48699e-05	0	0	0	0	0	0	0	0	0	1.7435e-05	0	0	0	0	0	0	0	0	0	0	0	0	0	0	0	0	0	k__Bacteria;p__Bacteroidota;c__Bacteroidia;o__Bacteroidales;f__Muribaculaceae;g__;s__
OTU_934	0	0	0	0	0	0	0.000435874	0	5.23049e-05	6.97399e-05	0	0	0	0	0	0	0	0	0	0	0	0	0	0	1.7435e-05	0	0	0	0	0	6.97399e-05	0	0	0	0	0	k__Bacteria;p__Bacteroidota;c__Bacteroidia;o__Bacteroidales;f__Bacteroidaceae;g__Bacteroides;s__Bacteroides_uniformis
OTU_935	0	0	0	0.000122045	0	0	0	0	0	0	0	0	0	0	0	0	0	0	0	0	0	0	0	0	0	0	0	0	0	0	0	0	0	0	0	0	k__Bacteria
OTU_936	0	0	1.7435e-05	0	1.7435e-05	1.7435e-05	0	0	0	0	1.7435e-05	0.00010461	0	0	1.7435e-05	0	0	0	0	0	0	0	0	0	0	0	0	1.7435e-05	0	0	0	6.97399e-05	0	0	1.7435e-05	0.00010461	k__Bacteria;p__Actinobacteriota;c__Thermoleophilia;o__Solirubrobacterales;f__Solirubrobacteraceae;g__Conexibacter;s__
OTU_937	0	0	3.48699e-05	0	0	0	0	0	0	0	0	0	0	0	0	0	3.48699e-05	0	0	0	0	0	0	0	0	0	0	0	0	0	0	0.00017435	0	0	0	0	k__Bacteria;p__Acidobacteriota;c__Thermoanaerobaculia;o__Thermoanaerobaculales;f__Thermoanaerobaculaceae;g__Subgroup_10;s__
OTU_938	0	0	0	0	0	0	0	0	0	0	0	0	3.48699e-05	0	0	0	0	0	0	5.23049e-05	0	0	0	0	0	0	0	0	0	0	0	0	0	0	1.7435e-05	0	k__Bacteria;p__unidentified_Bacteria;c__Alphaproteobacteria;o__Rhizobiales;f__;g__;s__
OTU_939	0	0	1.7435e-05	0	0	0	0	0	0	0	0	0	0	1.7435e-05	0	0	0	0	0	0	3.48699e-05	0	0	0	0	0	0	0	0	0	0	0	0	0	0	3.48699e-05	k__Bacteria;p__Chloroflexi;c__Anaerolineae;o__SBR1031;f__A4b;g__;s__
OTU_940	0	0	0	0	3.48699e-05	3.48699e-05	0	0	0	0	5.23049e-05	0	0	5.23049e-05	6.97399e-05	0	0	0	0	0	0	0	0	1.7435e-05	0	0	8.71748e-05	0	1.7435e-05	0	0	0	0	0	3.48699e-05	3.48699e-05	k__Bacteria;p__Firmicutes;c__Bacilli;o__Paenibacillales;f__Paenibacillaceae;g__Ammoniphilus;s__
OTU_941	0	0	0	0	1.7435e-05	0	0	0	0	0	0	0	0	0	0	0	0	1.7435e-05	0	8.71748e-05	0	0	0	0	0	1.7435e-05	3.48699e-05	0	0	0	0	0	0	0	5.23049e-05	0	k__Bacteria;p__Bacteroidota;c__Bacteroidia;o__Sphingobacteriales;f__Sphingobacteriaceae;g__Mucilaginibacter;s__Mucilaginibacter_sp
OTU_942	0	0	0	0	0	0	0	0	0	0	1.7435e-05	0	0	0	0	0	5.23049e-05	0	0	0	0	0	0	0	0	0	0	0	0	0	0	0	1.7435e-05	0	0	0	k__Bacteria
OTU_943	0	0	0	1.7435e-05	0	0	0.00010461	0	0	0	0	0	0	0	0	0	0	0	0	0	0	0	0	0	1.7435e-05	0	3.48699e-05	0	0	0	0	0	0	0	0	0	k__Bacteria;p__Actinobacteriota;c__Coriobacteriia;o__Coriobacteriales;f__Coriobacteriaceae;g__Collinsella;s__Collinsella_aerofaciens
OTU_944	0	0	0	0	1.7435e-05	0	0	0	0	0	0	0	0	1.7435e-05	0	0	0	0	0	0	0	0	0	0	0	0	6.97399e-05	0	0	0	0	0	3.48699e-05	0	0	0	k__Bacteria;p__Myxococcota;c__Polyangia;o__mle1-27
OTU_945	0	0	0	0	0	0	0	0	0	1.7435e-05	0	0	0	0	0	0	0	0	0	0	0	0	0	0	0.00010461	0	0	0	0	0	0	0	0	0	0	0	k__Bacteria;p__Proteobacteria;c__Alphaproteobacteria;o__Azospirillales;f__unidentified_Azospirillales;g__Stella;s__
OTU_946	0	0	0	0	0	0	0	0.00013948	1.7435e-05	0	0	0	0	0	0	0	0	0	0	0	0	0	0	0	0	0	0	0	0	0	0	0	0	0	0	0	k__Bacteria
OTU_947	0	0	0	0	0	0	0	0	0	0	5.23049e-05	0	0	0	0	0	0	0	0	0	0	0	0	0	0	0	0	0	0	0	0	0	3.48699e-05	0	0	0	k__Bacteria;p__Chloroflexi;c__Anaerolineae;o__SBR1031;f__A4b;g__;s__
OTU_948	0	0.000226655	0.000122045	0	0	0.00017435	0	0	0	0	0.00024409	6.97399e-05	0	0.00010461	0.000122045	0	8.71748e-05	0.00017435	0	1.7435e-05	3.48699e-05	0	0	0	0	1.7435e-05	0.00024409	0	0	0	0	3.48699e-05	6.97399e-05	0	0.000435874	1.7435e-05	k__Bacteria;p__Firmicutes;c__Bacilli;o__Bacillales;f__Bacillaceae;g__Bacillus
OTU_949	0	0	0	0	0	1.7435e-05	0	0	0	0	1.7435e-05	3.48699e-05	0	0	0	0	0	0	0	0	0	0	0	3.48699e-05	0	0	0	0	0	3.48699e-05	0	0	0	0	6.97399e-05	0	k__Bacteria;p__Acidobacteriota;c__Acidobacteriae;o__Bryobacterales;f__Bryobacteraceae;g__Bryobacter;s__
OTU_950	0	0	0	6.97399e-05	0	0	0	0	0	1.7435e-05	0	0	0	0	0	0	0	0	0	0	0	0	0	0	6.97399e-05	0	0	0	0	0	1.7435e-05	0	0	3.48699e-05	0	0	k__Bacteria;p__Proteobacteria;c__Gammaproteobacteria;o__Alteromonadales;f__Alteromonadaceae;g__Rheinheimera;s__
OTU_951	0	0	1.7435e-05	0	0	0	0	0	0	0	1.7435e-05	0	0	0	5.23049e-05	0	5.23049e-05	0	0	0	3.48699e-05	0	1.7435e-05	0	0	5.23049e-05	1.7435e-05	0	0	0	0	1.7435e-05	1.7435e-05	0	3.48699e-05	0	k__Bacteria;p__Actinobacteriota;c__Acidimicrobiia;o__Microtrichales;f__Ilumatobacteraceae;g__CL500-29_marine_group;s__
OTU_952	0	0	0	0	0	0	3.48699e-05	3.48699e-05	0	0	0	0	0	0	0	0	0	0	0	0	0	0	0	0	0	0	0	0	0	0	0	0	0	0	0	0	k__Bacteria
OTU_953	0	0	0	0	0	0	0	3.48699e-05	0.000122045	0	0	0	0	0	0	0	0	0	0	0	0	0	0	0	0	0	0	0	0	0	0	0	0	0	0	0	k__Bacteria;p__Bacteroidota;c__Bacteroidia;o__Bacteroidales;f__Rikenellaceae;g__Alistipes;s__
OTU_954	0	0	0	0	1.7435e-05	1.7435e-05	0	0	0	0	0	0	0	3.48699e-05	0	0	5.23049e-05	5.23049e-05	0	0	0	0	0	0	0	3.48699e-05	5.23049e-05	0	0	0	0	0	0	0	3.48699e-05	0	k__Bacteria;p__unidentified_Bacteria;c__Bacteroidia;o__Cytophagales;f__Microscillaceae;g__;s__
OTU_955	0	5.23049e-05	0	0	0	0	0	0	0	0	0	0	0	0	0	0	5.23049e-05	0	0	0	6.97399e-05	0	0	0	0	1.7435e-05	0	0	0	0	0	0	0	0	0	0	k__Bacteria;p__Bdellovibrionota;c__Oligoflexia;o__0319-6G20;f__;g__;s__
OTU_956	0	0	0	0	3.48699e-05	0	0	0	0	0	0	0	0	0	0	0	0	0	0	0	0	0	0	0	0	0	0	0	0	0	0	0	3.48699e-05	0	0	0	k__Bacteria;p__Acidobacteriota;c__Blastocatellia;o__Pyrinomonadales;f__Pyrinomonadaceae;g__RB41
OTU_957	0	0	0	0	0	0	0	0	0	0	0	0	0	6.97399e-05	0	0	0	0	0	0	0	0	0	0	0	0	0	0	0	0	0	0	0	0	0	0	k__Bacteria;p__Kapabacteria;c__unidentified_Kapabacteria;o__Kapabacteriales;f__;g__;s__
OTU_958	0	0	0	0	0	0	0	0	0	0	0	0	0.000122045	0	0	0	0	0	0	0	0	0	0	0	0	0	0	0	0	0	0	0	0	0	0	0	k__Bacteria;p__Proteobacteria;c__Gammaproteobacteria;o__unidentified_Gammaproteobacteria;f__unidentified_Gammaproteobacteria;g__Marinicella;s__
OTU_959	0	0	0	0	0	0	0	0	0	0	0	0	0	0	0	0	0	0	0	0	0	0	0	0	8.71748e-05	0	0	0	0	0	0	0	0	0	0	0	k__Bacteria
OTU_960	0	0	0	0	0	0	0	0	0	0	0	0	6.97399e-05	0	0	0	0	0	0	0	0	0	0	0	0	0	0	0	0	0	0	0	0	0	0	0	k__Bacteria;p__Chloroflexi;c__TK10;o__;f__;g__;s__
OTU_961	0	0	0	0	0	0	0	0	6.97399e-05	0	0	0	0	0	0	0	0	0	0	0	0	0	0	0	0	0	0	0	0	0	0	0	0	0	0	0	k__Bacteria
OTU_962	0	0	0	0	0	0	0	0	0	0	0	0	0	0	0	0	0	0	0	0	0	0	0	0	6.97399e-05	0	0	0	0	0	0	0	0	0	0	0	k__Bacteria
OTU_963	0	0	0	0	0	0	0	0	0	0	0	0	0	0	0	0	0	0	0	0	0	0	0	3.48699e-05	0	0	0	0	0	0	0	0	0	0	3.48699e-05	0	k__Bacteria;p__unidentified_Bacteria;c__Alphaproteobacteria;o__Zavarziniales;f__;g__;s__
OTU_964	0	0	0	0	0	0	0	0	0	0	0	0	0	0	0	0	0	0	0	0	0	0	0	0	0	0	0	0	0	0	0	0	0	0	5.23049e-05	0	k__Bacteria
OTU_965	0	0	0	0	0	0	0	0.000435874	0.00024409	0	5.23049e-05	0	0	0	0	0	0	0	0	0	0	0	0	0	0	0	0	0	0	0	0	0	0	0	3.48699e-05	0	k__Bacteria;p__Firmicutes;c__Clostridia;o__Lachnospirales;f__Lachnospiraceae;g__GCA-900066575;s__
OTU_966	0	0	0	0	0	0	0	0	0	0	0	0	0	3.48699e-05	0	0	0	0	0	0	1.7435e-05	0	0	0	0	0	0	0	0	0	0	0	0	0	0	0	k__Bacteria;p__Planctomycetota;c__Phycisphaerae;o__Tepidisphaerales;f__WD2101_soil_group;g__;s__
OTU_967	0	0	0	0	0	0	0	1.7435e-05	5.23049e-05	0	5.23049e-05	0	0	0	0	0	0	0	0	0	0	0	0	0	0	0	0	0	0	0	0	0	0	0	0	0	k__Bacteria;p__Bacteroidota;c__Bacteroidia;o__Bacteroidales;f__Prevotellaceae;g__Alloprevotella;s__
OTU_968	0	0	0	0	0	0	0	0	0	0	0	0	0	0	0	0	0	0	0	0	0	0	0	0	0	0	0	0	0	0	0	0.00010461	0	0	0	0	k__Bacteria;p__Planctomycetes;c__unidentified_Planctomycetes;o__Gemmatales;f__Gemmataceae;g__Gemmata;s__
OTU_969	0	0	0	0	0	0	0	5.23049e-05	5.23049e-05	0	0	0	0	0	0	0	0	0	0	0	0	0	0	0	0	0	0	0	0	0	0	0	0	0	0	0	k__Bacteria;p__Bacteroidota;c__Bacteroidia;o__Bacteroidales;f__Rikenellaceae
OTU_970	0	0	0	0	0	0	0	0.000122045	1.7435e-05	0	0	0	3.48699e-05	0	0	0	0	0	0	0	0	0	0	0	0	0	0	0	0	0	0	0	0	0	0	0	k__Bacteria;p__Firmicutes;c__Bacilli;o__Erysipelotrichales;f__Erysipelatoclostridiaceae;g__Erysipelatoclostridium;s__
OTU_971	0	0	0	0	0	0	0	0	0	0	3.48699e-05	0	0	0	0	0	0	0	0	6.97399e-05	0	0	0	0	0	0	0	0	0	0	0	0	0	0	0	0	k__Bacteria;p__Firmicutes;c__Clostridia;o__Oscillospirales;f__Ruminococcaceae;g__Ruminococcus
OTU_972	0	0	0	0	0	0	0	0	0	0	6.97399e-05	0	0	0	0	0	0	0	0	5.23049e-05	0	0	0	0	0	0	0	0	0	0	0	0	0	0	0.00010461	0	k__Bacteria;p__Bacteroidota;c__Bacteroidia;o__Bacteroidales;f__Muribaculaceae;g__;s__
OTU_973	0	0	0	0	0	0	0	5.23049e-05	0.00017435	0	0	0	0	0	0	0	0	0	5.23049e-05	0	0	0	0	0	0	0	0	0	0	0	0	0	0	0	0	0	k__Bacteria;p__Firmicutes;c__Clostridia;o__Oscillospirales;f__Oscillospiraceae;g__Oscillibacter;s__
OTU_974	0	0	0	0	0	0	0	0	0	0	0	0	0	0	0	0	0	0	0	0	0	0	0	0	6.97399e-05	0	0	0	0	0	0	0	0	1.7435e-05	0	0	k__Bacteria;p__unidentified_Bacteria;c__Acidimicrobiia;o__Microtrichales;f__;g__;s__
OTU_975	0	0	0	1.7435e-05	0	0	0	0	5.23049e-05	0	0	0	0	0	0	0	0	0	0	0	0	0	0	0	0	0	0	0	0	0	0	0	0	0	0	0	k__Bacteria;p__Firmicutes;c__Clostridia;o__Peptostreptococcales-Tissierellales;f__Peptostreptococcaceae;g__Peptostreptococcus;s__
OTU_976	0	0	0	0	0	0	0	0	0	0	0	0	0	0	1.7435e-05	0	0	0	0	0	0.000156915	0	0	0	0	0	0	0	0	0	0	0	0	0	0	0	k__Bacteria;p__Actinobacteriota;c__MB-A2-108;o__;f__;g__;s__
OTU_977	0	3.48699e-05	0	0	0	0	0	0	0	0	1.7435e-05	3.48699e-05	0	1.7435e-05	0	0	0	0	0	0	0	0	0	0	0	1.7435e-05	0	0	0	0	0	0	0	0	0	0	k__Bacteria;p__Chloroflexi;c__Anaerolineae;o__SBR1031;f__A4b;g__;s__
OTU_978	0	0	0	0	0	0	0	0	0	5.23049e-05	0	0	0	0	0	0	0	0	0	0	0	0	0	0	0	0	0	3.48699e-05	0	0	1.7435e-05	0	0	0	0	0	k__Bacteria;p__Chloroflexi;c__Chloroflexia;o__Chloroflexales;f__Roseiflexaceae;g__Kouleothrix;s__
OTU_979	0	0	0	0	0	0	0	0	0	0	0	1.7435e-05	0	1.7435e-05	0	0	0	3.48699e-05	0	0	0	0	0	6.97399e-05	0	0	0	0	0	0	0	1.7435e-05	0	0	0	0	k__Bacteria;p__unidentified_Bacteria;c__Gammaproteobacteria;o__Burkholderiales;f__Comamonadaceae;g__unidentified_Comamonadaceae;s__Ideonella_sp
OTU_980	0	0	0	0	0	0	0	0	0	0	0	0	0	0	0	0	0	0	0	0	0	0	0	0	5.23049e-05	0	0	1.7435e-05	0	0	0	0	0	0	0	0	k__Bacteria;p__Chloroflexi;c__Anaerolineae;o__SBR1031;f__A4b;g__;s__
OTU_981	0	0	0	0	0	0	0	0	0	0	0	3.48699e-05	0	0	0	0	0	0.000156915	0	0	0	0	0	0	0	0	1.7435e-05	0	0	0	0	0	0	0	0	0	k__Bacteria;p__Proteobacteria;c__Gammaproteobacteria;o__Cellvibrionales;f__Halieaceae;g__OM60(NOR5)_clade;s__
OTU_982	0	0	0	0	0	0	0	0.00010461	6.97399e-05	0	0	0	3.48699e-05	0	0	0	0	0	0	0	0	0	0	0	0	0	0	0	0	0	0	0	0	0	0	0	k__Bacteria;p__Firmicutes;c__Clostridia;o__Oscillospirales;f__UCG-010;g__;s__
OTU_983	0	1.7435e-05	3.48699e-05	0	0	0	0	0	0	0	0	6.97399e-05	0	5.23049e-05	0	0	0	0	0	0	0	0	0	0	0	0	0	0	0	0	0	0	0	0	0	3.48699e-05	k__Bacteria;p__WPS-2;c__;o__;f__;g__;s__
OTU_984	0	0	0	0	0	0	0	0.00010461	0.00017435	0	0	0	0	0	0	6.97399e-05	0	0	0	0	0	0	0	0	0	0	0	0	0	0	0	0	0	0	0	0	k__Bacteria;p__Firmicutes;c__Clostridia;o__Lachnospirales;f__Lachnospiraceae;g__Lachnospiraceae_NK4A136_group;s__
OTU_985	0	0	0	0	0	0	0	5.23049e-05	5.23049e-05	0	0	0	0	0	0	0	0	0	0	0	0	0	0	0	0	0	0	0	0	0	0	0	0	0	0	0	k__Bacteria;p__Bacteroidota;c__Bacteroidia;o__Bacteroidales;f__Prevotellaceae
OTU_986	0	3.48699e-05	0	0	3.48699e-05	0	0	0	0	0	0	0	0	0	1.7435e-05	0	0	0	0	0	0	0	0	0	0	1.7435e-05	3.48699e-05	0	0	0	0	0	0	0	0	0	k__Bacteria;p__Acidobacteriota;c__Acidobacteriae;o__Acidobacteriales;f__Acidobacteriaceae_(Subgroup_1)
OTU_987	0	0	0	0	0	0	0	0	0	1.7435e-05	0	1.7435e-05	0	0	1.7435e-05	0	5.23049e-05	0	0	0	0	0	0	3.48699e-05	0	0	0	5.23049e-05	0	1.7435e-05	3.48699e-05	1.7435e-05	0	0	0	0	k__Bacteria;p__unidentified_Bacteria;c__Acidimicrobiia;o__Microtrichales;f__Microtrichaceae;g__;s__
OTU_988	0	0	0	0	0	0	0	6.97399e-05	6.97399e-05	0	0	0	0	0	0	0	0	0	0	0	0	0	0	0	8.71748e-05	0	0	0	0	0	0	0	0	0	0	0	Unknown
OTU_989	0	0	1.7435e-05	0	0	0	0	0	0	0	0	0	0	0	0	0	0.000278959	5.23049e-05	0	0	0	0	0	0	0	0	0	0	0	0	0	0	0	0	0	0	k__Bacteria;p__unidentified_Bacteria;c__Gammaproteobacteria;o__Pseudomonadales;f__Moraxellaceae;g__;s__
OTU_990	0	3.48699e-05	0	0	0	0	0	0	0	0	0	6.97399e-05	0	8.71748e-05	1.7435e-05	0	3.48699e-05	0	0	0	0	0	6.97399e-05	1.7435e-05	0	5.23049e-05	0	0	0	1.7435e-05	0	3.48699e-05	5.23049e-05	0	0	0	k__Bacteria;p__Myxococcota;c__Polyangia;o__Polyangiales
OTU_991	0	0	0	0.00010461	0	0	0	0	0	5.23049e-05	0	0	0	0	0	0	0	0	0	0	0	0	0	0	1.7435e-05	0	0	0	0	0	0	0	0	0	0	0	k__Bacteria
OTU_992	0	0	0	0	0	0	0	0	3.48699e-05	0	0	0	0	0	0	0	3.48699e-05	0	0	0	0	0	0	0	6.97399e-05	0	0	0	0	0	0	0	0	0	0	0	k__Bacteria
OTU_993	0	0	0	0	0	0	0	0	6.97399e-05	0	0	0	0	0	0	0	0	0	0	0	0	0	0	0	0	0	0	0	0	0	0	0	0	0	0	0	k__Bacteria
OTU_994	0	0	0	0	0	0	0	0	0	0	0	0	0	0	0	0	0	0	0	0	0	0	0	0	5.23049e-05	0	0	0	0	0	0	0	0	3.48699e-05	0	0	k__Bacteria;p__Proteobacteria;c__Gammaproteobacteria;o__Burkholderiales;f__Nitrosomonadaceae;g__oc32;s__
OTU_995	0	0	0	0	0	0	0	5.23049e-05	5.23049e-05	0	0	0	0	0	0	0	0	0	0	0	0	0	0	0	0	0	0	0	0	0	0	0	0	0	0	0	k__Bacteria
OTU_996	0	0	0	0	0	0	0	0	0	0	0	0	0	0	0	0	0	0	0	0	0	0	0	0	0.00010461	0	0	0	0	0	1.7435e-05	0	0	0	0	0	k__Bacteria;p__Firmicutes;c__Bacilli;o__Erysipelotrichales;f__Erysipelatoclostridiaceae;g__Erysipelatoclostridium;s__[Clostridium]_spiroforme
OTU_997	0	0	0	6.97399e-05	0	0	0	0	0	0	0	0	0	0	0	0	0	0	0	0	0	0	0	0	5.23049e-05	0	0	0	0	0	0	0	0	0	0	0	k__Bacteria;p__Proteobacteria;c__Alphaproteobacteria;o__Rhizobiales;f__unidentified_Rhizobiales;g__Phreatobacter;s__
OTU_998	0	0	0	3.48699e-05	0	0	0	0	0	0	0	0	0	0	0	0	0	0	0	0	0	0	0	0	6.97399e-05	0	0	0	0	0	0	0	0	0	0	0	k__Bacteria;p__unidentified_Bacteria;c__Anaerolineae;o__Caldilineales;f__Caldilineaceae;g__;s__
OTU_999	0	0	0	0	0	0	0	0	0	0	0	0	0	0	0	0	0	0	0	3.48699e-05	0	0	0	0	0	0	0	0	0	0	0	5.23049e-05	0	0	0	0	k__Bacteria;p__Verrucomicrobiota;c__Verrucomicrobiae;o__Opitutales;f__Opitutaceae
OTU_1000	0	0	0	0	0	0	0	0	0	0	0	0	0	0	0	0	0.00013948	0	0	0	0	0	0	0	0	0	0	0	0	0	0	0	0	0	0	0	Unknown
OTU_1001	0	0	0	0	0	0	0	0	0	0	0	0	0	0	0	0	0	0	0	0	0	0	0	0	0	0	0	0	0	0	0	0	0	8.71748e-05	0	0	k__Bacteria
OTU_1002	0	0	0	0	0	0	0	0.00010461	0.00010461	0	0	0	0	0	0	0	0	0	0	0	0	0	0	0	0	0	0	0	0	0	0	0	0	0	0	0	k__Bacteria;p__unidentified_Bacteria;c__Clostridia;o__Lachnospirales;f__Lachnospiraceae;g__;s__
OTU_1003	0	0	0	0	0	0	0	0.00010461	0	0	0	0	0	0	0	0	0	0	0	0	0	0	0	0	0	0	0	0	0	0	0	0	0	0	1.7435e-05	0	k__Bacteria;p__Bacteroidota;c__Bacteroidia;o__Bacteroidales;f__Muribaculaceae;g__;s__
OTU_1004	1.7435e-05	0.000296394	0	1.7435e-05	0	0.000156915	1.7435e-05	0	0	3.48699e-05	1.7435e-05	3.48699e-05	0.00010461	0.00020922	0	0	0	0	0	0	0	0	3.48699e-05	1.7435e-05	5.23049e-05	0	0.000296394	3.48699e-05	0	0	0.00010461	0	5.23049e-05	5.23049e-05	8.71748e-05	0	k__Bacteria;p__Proteobacteria;c__Alphaproteobacteria;o__Rhodobacterales;f__Rhodobacteraceae;g__Rhodobacter;s__
OTU_1005	0	0	0	0	0	0	0	0	0	0	0	0	0	0	0	0	3.48699e-05	0	0	8.71748e-05	0	0	0	0	5.23049e-05	0	0	1.7435e-05	0	0	3.48699e-05	6.97399e-05	0	3.48699e-05	0	0	k__Bacteria;p__Bacteroidota;c__Bacteroidia;o__Sphingobacteriales;f__Sphingobacteriaceae;g__Pedobacter
OTU_1006	0	0	3.48699e-05	0	0	0	0	0	0	0	3.48699e-05	1.7435e-05	0	0	5.23049e-05	0	0	1.7435e-05	0	0	0	0	5.23049e-05	1.7435e-05	0	0	0	0	0	0	0	0	0	0	6.97399e-05	3.48699e-05	k__Bacteria;p__Actinobacteriota;c__Actinobacteria;o__Streptosporangiales;f__Thermomonosporaceae;g__Actinoallomurus;s__Actinoallomurus_sp
OTU_1007	0	0	0	0	0	0	0	6.97399e-05	0	0	0	0	0	0	0	0	0	0	0	0	0	0	0	0	0	0	0	0	0	0	0	0	0	0	0	0	k__Bacteria
OTU_1008	0	0	0	0	0	0	0	0	0	0	0	0	0	0	0	0	0	0	0	0	0	0	0	0	0	0	5.23049e-05	0	0	0	0	0	0	0	0	0	k__Bacteria;p__Chloroflexi;c__Chloroflexia;o__Thermomicrobiales;f__JG30-KF-CM45;g__;s__
OTU_1009	0	0	0	0	0	0	0	0.000122045	8.71748e-05	0	0	0	0	0	0	0	0	0	0	0	0	0	0	0	0	0	0	0	0	0	0	0	0	0	0	0	k__Bacteria;p__Bacteroidota;c__Bacteroidia;o__Bacteroidales;f__Muribaculaceae;g__;s__
OTU_1010	0	0	1.7435e-05	0	8.71748e-05	3.48699e-05	0	0	0	0	3.48699e-05	5.23049e-05	0	1.7435e-05	3.48699e-05	0	0	0	0	8.71748e-05	0	0	0	0	0	1.7435e-05	8.71748e-05	0	0	0	0	0.00010461	0	0	0	6.97399e-05	k__Bacteria;p__Acidobacteriota;c__Acidobacteriae;o__Acidobacteriales;f__Acidobacteriaceae_(Subgroup_1);g__Terracidiphilus;s__
OTU_1011	0	0	0	0	0	0	0.00017435	0	0	0	0	0	0	0	0	0	0	0	0	0	0	0	0	0	0.00020922	0	0	0	0	0	0	0	0	0	0	0	k__Bacteria;p__Firmicutes;c__Clostridia;o__Clostridia_UCG-014;f__;g__;s__
OTU_1012	0	0	0	6.97399e-05	0	0	0	0	0	6.97399e-05	6.97399e-05	0	0	0	0	0	0	0	0	0	0	0	0	0	0	0	0	0	0	0	0	0	0	0	0	0	k__Bacteria;p__Firmicutes;c__Clostridia;o__Oscillospirales;f__Oscillospiraceae;g__NK4A214_group;s__
OTU_1013	0	0	0	0	0	0	0	0	0	0	3.48699e-05	0	0	0	0	0	0	0	0	0	0	0	0	0	0	0	0	0	0	0	0	1.7435e-05	0	0	6.97399e-05	0	k__Bacteria;p__unidentified_Bacteria;c__Alphaproteobacteria;o__Rhodospirillales;f__;g__;s__
OTU_1014	0	0	0	0	0	0	0	8.71748e-05	1.7435e-05	0	0	0	0	0	0	0	0	0	0	0	0	0	0	0	0	0	0	0	0	0	0	0	0	0	0	0	k__Bacteria;p__Firmicutes;c__Clostridia;o__Oscillospirales;f__Ruminococcaceae;g__Anaerotruncus;s__
OTU_1015	0	0	0	5.23049e-05	0	0	0	0	0	3.48699e-05	0	0	0	0	0	0	0	0	0	0	0	0	0	0	6.97399e-05	0	0	0	0	0	0	0	0	0	0	0	k__Bacteria
OTU_1016	0	0	0	0	0	0	0	0	0	0	0	0	0	0	0	0	0	0	0	0	0	0	0	0	0	0	0	0	0	0	0	0.000191785	0	0	0	0	k__Bacteria;p__Proteobacteria;c__Alphaproteobacteria;o__Rickettsiales;f__Mitochondria
OTU_1017	0	3.48699e-05	0	0	0	0	0	0	0	0	0	0	0	0	0	0	3.48699e-05	0	0	0	0	0	0	0	0	0	0	0	0	0	0	1.7435e-05	0	0	5.23049e-05	0	k__Bacteria;p__Myxococcota;c__Polyangia;o__Polyangiales;f__Phaselicystidaceae;g__Phaselicystis;s__
OTU_1018	0	0	0	0	0	0	0	0	0	0	1.7435e-05	0	0	0	0	0	0	1.7435e-05	0	0	0	0	0	0	0	0	0	0	0	0	0	0	0	0	0	6.97399e-05	k__Bacteria;p__Acidobacteriota;c__Acidobacteriae;o__Bryobacterales;f__Bryobacteraceae;g__Bryobacter;s__
OTU_1019	0	0	0	0	0	0	0	0	0	0	0	0	0	0	1.7435e-05	0	0	1.7435e-05	0	0	1.7435e-05	0	0	0	0	1.7435e-05	0	0	0	6.97399e-05	0	1.7435e-05	0	0	0	0	k__Bacteria;p__Bdellovibrionota;c__Bdellovibrionia;o__Bdellovibrionales;f__Bdellovibrionaceae;g__Bdellovibrio
OTU_1020	3.48699e-05	0	0	0	0	0	6.97399e-05	0	0	5.23049e-05	0	0	0	0	0	0	0	0	0	0	0	0	0	0	0	0	0	0	0	0	0	0	0	0	0	0	k__Bacteria
OTU_1021	0	0	0	0	0	0	0	0	0	0	0	1.7435e-05	0	0	0	0	5.23049e-05	0	0	1.7435e-05	0	0	0	0	0	0	3.48699e-05	0	0	0	0	3.48699e-05	0	0	0	0	k__Bacteria;p__unidentified_Bacteria;c__Bacteroidia;o__Chitinophagales;f__Chitinophagaceae;g__;s__
OTU_1022	0	0	0	0	0	0	0	0.00010461	0	0	0	0	0	0	0	0	0	0	0	0	0	0	0	0	1.7435e-05	0	0	0	0	0	0	0	0	0	0	0	k__Bacteria
OTU_1023	0	0	0	0	0	0	0	0	0	0	0	0	0	0	0	0	0	0	0	0	0	0	3.48699e-05	5.23049e-05	0	0	3.48699e-05	0	0	0	0	0	8.71748e-05	0	0	0	k__Bacteria;p__Actinobacteriota;c__Acidimicrobiia;o__Microtrichales;f__Ilumatobacteraceae;g__Ilumatobacter;s__
OTU_1024	0	0	0	0	0	0	0	0	0	0	0	0	0	0	0	0	0	1.7435e-05	0	0	0	0	0	1.7435e-05	0	0	0	0	0	1.7435e-05	0	0	0	0	0	0	k__Bacteria;p__Gemmatimonadetes;c__unidentified_Gemmatimonadetes;o__Gemmatimonadales;f__Gemmatimonadaceae;g__Gemmatimonas;s__
OTU_1025	0	0	0	0	0	0	0	0	0	5.23049e-05	0	0	0	0	0	0	0	0	0	0	0	0	0	0	0.000122045	0	0	0	0	0	1.7435e-05	0	0	5.23049e-05	0	0	k__Bacteria;p__Proteobacteria;c__Gammaproteobacteria;o__Burkholderiales;f__Rhodocyclaceae;g__Sulfuritalea;s__
OTU_1026	0	0	0	0	0	0	0	1.7435e-05	0	0	1.7435e-05	0	0	0	0	0	0	0	0	5.23049e-05	0	0	0	0	0	0	3.48699e-05	0	0	0	0	0	0	0	0	0	k__Bacteria;p__Firmicutes;c__Clostridia;o__Oscillospirales;f__Oscillospiraceae;g__NK4A214_group;s__
OTU_1027	0	0	0	0	0	0	0	0	0	0	0	0.00024409	0	0	0	0	0	0	0	0	1.7435e-05	0	3.48699e-05	0	0	0	0	0	0	0	0	0	0	0	0	0	k__Bacteria;p__Actinobacteriota;c__Coriobacteriia;o__Coriobacteriales;f__Atopobiaceae;g__Olsenella;s__
OTU_1028	0	0	0	0	0	0	0	0	0	0	3.48699e-05	0	0	0	0	0	0	0	0	3.48699e-05	0	0	0	0	0	0	0	0	0	0	0	0	0	0	8.71748e-05	0	k__Bacteria;p__Bacteroidota;c__Bacteroidia;o__Bacteroidales;f__Muribaculaceae;g__;s__
OTU_1029	0	5.23049e-05	0	0	0	0	0	0	0	0	0	1.7435e-05	0	0	3.48699e-05	0	0	6.97399e-05	0	0	0	0	0	1.7435e-05	0	0	5.23049e-05	0	0	0	0	0	0	0	0	0	k__Bacteria;p__Firmicutes;c__Bacilli;o__Bacillales;f__Bacillaceae;g__Bacillus
OTU_1030	0	0.000122045	0	0	0	0	0	0	0	0	0	0	0	0.000156915	0	0	0	0	0	0	0	0	0	0	0	1.7435e-05	0	0	0	0	0	0	0	0	0	0	k__Bacteria;p__Bdellovibrionota;c__Oligoflexia;o__Oligoflexales;f__unidentified_Oligoflexales;g__Oligoflexus
OTU_1031	0	0.00010461	0	0	0	5.23049e-05	0	0	0	0	0	1.7435e-05	0	3.48699e-05	8.71748e-05	0	6.97399e-05	3.48699e-05	0	0	0	0	0	0	0	6.97399e-05	6.97399e-05	0	0	0	0	1.7435e-05	3.48699e-05	0	0	1.7435e-05	k__Bacteria;p__Acidobacteriota;c__Vicinamibacteria;o__Vicinamibacterales;f__Vicinamibacteraceae;g__Luteitalea;s__
OTU_1032	0	0	0	0	0	0	0	0	0	0	0	0	0	0	0	0	0	0	0	0	0	0	0	0	1.7435e-05	0	0	0	0	0	6.97399e-05	0	0	0	0	0	k__Bacteria;p__unidentified_Bacteria;c__Gammaproteobacteria;o__Pseudomonadales;f__Moraxellaceae;g__;s__
OTU_1033	0	0	0	3.48699e-05	0	0	1.7435e-05	0	0	1.7435e-05	0	0	0	0	0	0	0	0	0	0	0	0	0	0	0	0	0	3.48699e-05	0	0	0	6.97399e-05	0	1.7435e-05	0	0	k__Bacteria
OTU_1034	0	0	0	0	0	0	0	0	0	0	0	0	0	0	3.48699e-05	0	0	0	0	6.97399e-05	0	0	0	0	0	0	6.97399e-05	0	0	0	0	0	0	0	0	0	k__Bacteria;p__Proteobacteria;c__Alphaproteobacteria;o__Sphingomonadales;f__Sphingomonadaceae;g__Sphingobium
OTU_1035	0	0	0	0	0	0	0	0	0	0	0	0	0	0	0	0	0	0	0	0	0	0	0	0	0	0	0	0	0	0	0	0.000122045	0	0	0	0	k__Bacteria;p__unidentified_Bacteria;c__unidentified_Bacteria;o__Gemmatales;f__Gemmataceae;g__;s__
OTU_1036	0	1.7435e-05	0	0	0	0	0	0	0	0	0	0	0	0	1.7435e-05	0	5.23049e-05	0	0	0	5.23049e-05	0	0	5.23049e-05	0	0	0	0	0	3.48699e-05	0	0	0	0	0	5.23049e-05	k__Bacteria;p__Actinobacteriota;c__Actinobacteria;o__Pseudonocardiales;f__Pseudonocardiaceae;g__Pseudonocardia
OTU_1037	0	0	0	0	0	0	0	0.00013948	6.97399e-05	0	0	0	0	0	0	0	0	0	0	0	0	0	0	0	0	0	0	0	0	0	0	0	0	0	3.48699e-05	0	k__Bacteria;p__Bacteroidota;c__Bacteroidia;o__Bacteroidales;f__Muribaculaceae;g__;s__
OTU_1038	0	0	3.48699e-05	0	0	0	0	0	0	0	0	0	0	0	0	0	3.48699e-05	1.7435e-05	0	0	0	0	0	0	0	0	0	0	0	0.00010461	0	0	0	0	0	0	k__Bacteria;p__unidentified_Bacteria;c__Acidimicrobiia;o__;f__;g__;s__
OTU_1039	0	1.7435e-05	0	0	0	0	0	0	0	0	0	0	0	3.48699e-05	5.23049e-05	0	0	5.23049e-05	0	5.23049e-05	0	0	1.7435e-05	0	0	0	0	0	0	0	0	0	0	0	0	0	k__Bacteria;p__unidentified_Bacteria;c__Vicinamibacteria;o__Vicinamibacterales;f__unidentified_Vicinamibacterales;g__unidentified_Vicinamibacterales;s__Acidobacteria_bacterium_SCN_69-37
OTU_1040	0	0	3.48699e-05	0	0	0	0	0	0	0	0	0	0	0	0	0	0	0	0	6.97399e-05	0	0	0	0	0	0	0	0	0	0	0	0	0	0	0	0	k__Bacteria;p__unidentified_Bacteria;c__Acidimicrobiia;o__Microtrichales;f__;g__;s__
OTU_1041	1.7435e-05	0	0	0	0	0	0	0	6.97399e-05	0	0	0	0	0	0	0	0	0	0	0	0	0	0	0	0	0	0	0	0	0	0	0	0	0	0	0	k__Bacteria
OTU_1042	0	8.71748e-05	0	0	0	0	0	0	0	0	0	1.7435e-05	0	0	0	0	0	0	0	0	0	0	0	0	0	0	0	0	0	0	0	0	0	0	0	1.7435e-05	k__Bacteria
OTU_1043	0	0	0.00010461	0	0	6.97399e-05	0	0	0	5.23049e-05	0	1.7435e-05	0	0	8.71748e-05	0	1.7435e-05	3.48699e-05	0	0	0	0	1.7435e-05	0	3.48699e-05	0	0	0	0	0	0	0	1.7435e-05	1.7435e-05	0	5.23049e-05	k__Bacteria;p__Proteobacteria;c__Alphaproteobacteria;o__Acetobacterales;f__Acetobacteraceae;g__Roseomonas
OTU_1044	0	8.71748e-05	0	0	0	0	0	0	0	0	1.7435e-05	0	0	0	0	0	5.23049e-05	0	0	0	0	0	0	0	0	0	1.7435e-05	0	0	1.7435e-05	0	0	0	0	6.97399e-05	0	k__Bacteria;p__Myxococcota;c__Polyangia;o__Haliangiales;f__Haliangiaceae;g__Haliangium;s__
OTU_1045	0	0	0	0	0	0	0	0	0	0	0	0	0	0	0	0	0	0	0	0	0	0	0	0	3.48699e-05	0	8.71748e-05	0	0	0	0	0	0	0	0	0	k__Bacteria;p__Chloroflexi;c__Chloroflexia;o__Kallotenuales;f__AKIW781;g__;s__
OTU_1046	0	0	0	3.48699e-05	0	0	0	0	0	0	0	0	0	0	0	0	0	5.23049e-05	0	0	0	0	0	0	5.23049e-05	0	0	0	0	0	1.7435e-05	0	0	0	0	0	k__Bacteria;p__Proteobacteria;c__Gammaproteobacteria;o__Ga0077536;f__;g__;s__
OTU_1047	0	0	0	0	0	0	0	0	0	0	3.48699e-05	3.48699e-05	0	0	0	0	0	1.7435e-05	0	0	0	0	0	1.7435e-05	0	0	0	0	0	0	0	1.7435e-05	0	0	6.97399e-05	0	k__Bacteria;p__Proteobacteria;c__Gammaproteobacteria;o__Burkholderiales;f__Burkholderiaceae;g__Burkholderia-Caballeronia-Paraburkholderia
OTU_1048	0	0	0	0	0	0	0	0	0	0	0	0	0.000122045	0	0	0	0	0	0	0	0	0	0	0	0	0	0	0	0	0	0	0	0	0	0	0	k__Bacteria;p__unidentified_Bacteria;c__Acidimicrobiia;o__Actinomarinales;f__;g__;s__
OTU_1049	0	0	0	0	0	0	0	0	0	0	0	8.71748e-05	0	0	1.7435e-05	0	0	0	0	0	0	0	0	0	0	3.48699e-05	0	0	0	0	0	0	0	0	0	0	k__Bacteria;p__Planctomycetes;c__unidentified_Planctomycetes;o__Isosphaerales;f__Isosphaeraceae;g__Aquisphaera;s__
OTU_1050	0	0	0	0	0	0	0	0	0	0	0	0.000122045	0	0	0	0	0	0	0	0	0	0	0	0	0	0	3.48699e-05	0	0	0	0	0	0	0	0	0	k__Bacteria;p__unidentified_Bacteria;c__Acidobacteriae;o__Acidobacteriales;f__;g__;s__
OTU_1051	0	0	0	0	0	0	0	0	0	0	0	5.23049e-05	0	0	0	0	0	0	0	0	0	0	0	0	0	0	0	0	0	1.7435e-05	0	6.97399e-05	0	0	5.23049e-05	0	k__Bacteria;p__Actinobacteriota;c__Actinobacteria;o__Propionibacteriales;f__Nocardioidaceae;g__Nocardioides
OTU_1052	0	0	0	1.7435e-05	0	0	0	0	0	1.7435e-05	0	0	0	0	0	0	0	0	0	0	0	0	0	0	0	0	0	3.48699e-05	0	0	0	0	0	1.7435e-05	0	0	k__Bacteria
OTU_1053	0	0	0	0	0	0	0	0	0	0	0	0	0	0	0	0	0	3.48699e-05	0	0	0	0	0	0	0	0	0	0	0	5.23049e-05	0	1.7435e-05	0	0	0	0	k__Bacteria;p__Chlamydiae;c__unidentified_Chlamydiae;o__Chlamydiales
OTU_1054	0	0	0	0	0	0	0	0	0	5.23049e-05	0	0	0	0	0	0	0	0	0	0	0	0	0	0	0	0	0	0	0	0	0	0	0	0	0	0	k__Bacteria
OTU_1055	0	0	0	3.48699e-05	0	0	0.000348699	0	0	6.97399e-05	0	0	0	0	0	0	0	0	0	0	0	0	0	0	0.000296394	0	0	3.48699e-05	0	0	6.97399e-05	0	0	6.97399e-05	0	0	k__Bacteria;p__Firmicutes;c__Clostridia;o__Lachnospirales;f__Lachnospiraceae;g__Blautia
OTU_1056	0	0	0	0	0	0	0	0	0	0	3.48699e-05	0	0	0	0	0	0	0	0	0	0	0	0	8.71748e-05	0	5.23049e-05	0	0	0	0	0	0	0	0	3.48699e-05	0	k__Bacteria;p__Verrucomicrobiota;c__Verrucomicrobiae;o__Pedosphaerales;f__Pedosphaeraceae;g__;s__
OTU_1057	0.00212707	0.00584071	0.00587558	0.00301625	0.00495153	0.00631146	0.00530023	0.00111584	0.000435874	0.00976358	0.00020922	0.000331264	3.48699e-05	0.000122045	0.00024409	0.000523049	0.00132506	0.000261525	0	0.000366134	0.00758421	1.7435e-05	0.00329521	5.23049e-05	0.00352186	0.0013948	0.00020922	0.0680487	0.0519213	0.050945	0.0224737	0.0117512	0.0272334	0.00692168	0.00978102	0.00770626	k__Bacteria;p__Proteobacteria;c__Gammaproteobacteria;o__Pseudomonadales;f__Pseudomonadaceae;g__Pseudomonas
OTU_1058	0	0	0	0	0	0	0	0	0	0	6.97399e-05	0	0	0	0	0	3.48699e-05	5.23049e-05	0	0	0	0	0	0	0	0	0	0	0	0	0	0	0	0	0	0	k__Bacteria;p__Myxococcota;c__Polyangia;o__Polyangiales;f__BIrii41
OTU_1059	0	0	0	0	0	0	0	0	0	0	0	0.00013948	0	0	0	0	0	0	0	0	0	0	0	0	0	0	0	0	0	0	0	0	0	0	0	0	k__Bacteria;p__Gemmatimonadetes;c__unidentified_Gemmatimonadetes;o__Gemmatimonadales;f__Gemmatimonadaceae
OTU_1060	0	0	0	0	0	0	0	0	0	0	0	0	0.00010461	0	0	0	0	0	0	0	0	0	0	0	0	0	0	0	0	0	0	0	0	0	0	0	k__Bacteria;p__Myxococcota;c__Polyangia;o__Polyangiales;f__BIrii41;g__;s__
OTU_1061	0	0	0	0	0	0	0	0	0	0	0	0	0	0	0	0	0	0	0	0	0	0	0	0	0	0	0	6.97399e-05	0	0	0	0	0	0	0	0	k__Bacteria;p__Proteobacteria;c__Gammaproteobacteria;o__Burkholderiales;f__Rhodocyclaceae;g__Dechloromonas;s__
OTU_1062	0	1.7435e-05	3.48699e-05	0	0	0	0	0	0	0	0	0	0	0	5.23049e-05	0	1.7435e-05	0	0	5.23049e-05	0	0	3.48699e-05	0	0	0	1.7435e-05	0	0	0	0	0	3.48699e-05	0	0	3.48699e-05	k__Bacteria;p__unidentified_Bacteria;c__Bacteroidia;o__Chitinophagales;f__Chitinophagaceae;g__unidentified_Chitinophagaceae;s__Terrimonas_sp
OTU_1063	0	0	6.97399e-05	0	0	0	0	0	0	0	1.7435e-05	1.7435e-05	0	0	0	0	0	0	0	3.48699e-05	0	0	0	0	0	1.7435e-05	0	0	0	1.7435e-05	0	0	0	0	1.7435e-05	5.23049e-05	k__Bacteria;p__unidentified_Bacteria;c__Bacilli;o__Thermoactinomycetales;f__Thermoactinomycetaceae;g__unidentified_Thermoactinomycetaceae;s__Marinithermofilum_abyssi
OTU_1064	0	0	0	0	0	0	0	0	0	0	0	0	0	0	0	0	5.23049e-05	0	0	3.48699e-05	0	0	1.7435e-05	0	0	0	0	0	0	5.23049e-05	0	1.7435e-05	0	0	0	1.7435e-05	k__Bacteria;p__Proteobacteria;c__Alphaproteobacteria;o__Rhizobiales;f__unidentified_Rhizobiales;g__Bauldia;s__
OTU_1065	0	0	0	0	0	0	0	0	3.48699e-05	0	0	0	0	0	0	0	0	0	0	0	0	0	0	0	0	0	0	0	0	0	0	6.97399e-05	0	0	0	0	k__Bacteria
OTU_1066	0	0	0	0	0	0	0	0	0	0	0	0	0	0	0	0	0	0	0	0	0	0	0	8.71748e-05	0	0	0	0	0	0	0	0	0	0	0	0	k__Bacteria;p__unidentified_Bacteria;c__Saccharimonadia;o__Saccharimonadales;f__;g__;s__
OTU_1067	0.00395774	0	0	0.00500384	0	1.7435e-05	0.00474231	0	0	0.00278959	0	1.7435e-05	0	0	0	0	0	0.000383569	0	0	0	0	0	0	0.00217937	0	0	0.00523049	0	0	0.00606737	0	0	0.00287677	0	0	k__Bacteria;p__Proteobacteria;c__Gammaproteobacteria;o__Aeromonadales;f__Aeromonadaceae;g__Aeromonas
OTU_1068	0	0	3.48699e-05	0	0	0	0	0	0	0	0	0	0	0	3.48699e-05	0	0	0	0	1.7435e-05	0	0	0	0	0	0	0	0	0	0	0	0	0	0	1.7435e-05	0	k__Bacteria;p__Acidobacteriota;c__Acidobacteriae;o__Subgroup_2;f__;g__;s__
OTU_1069	0	0	0	0	0	0	0	0.000313829	0.000226655	0	0	0	1.7435e-05	0	0	0	0	0	0	0	0	0	0	0	0	0	0	0	0	0	0	0	0	0	0	0	k__Bacteria;p__Bacteroidota;c__Bacteroidia;o__Bacteroidales;f__Muribaculaceae;g__;s__
OTU_1070	0	0	0	1.7435e-05	0	0	0	0	0	1.7435e-05	0	0	0	0	0	0	0	0	0	0	0	0	0	0	0.000261525	0	0	5.23049e-05	0	0	3.48699e-05	0	0	1.7435e-05	0	0	k__Bacteria;p__unidentified_Bacteria;c__Polyangia;o__Polyangiales;f__Polyangiaceae;g__;s__
OTU_1071	0	0	0	0	0	0	0	0	0	0	0	0	0	0	0	0	0	0	0	0	0	0	0	0	8.71748e-05	0	0	0	0	0	0	0	0	3.48699e-05	0	0	k__Bacteria;p__Firmicutes;c__Clostridia;o__Peptostreptococcales-Tissierellales;f__Peptostreptococcaceae;g__Acetoanaerobium;s__
OTU_1072	0	0	0	0	0	0	0	0	0	0	0	0	0	0	0	0	0.00024409	0	0	0	0	0	0	0	0	0	0	0	0	0	0	0	0	0	0	0	k__Bacteria;p__Bacteroidota;c__Bacteroidia;o__Flavobacteriales;f__Weeksellaceae;g__Chryseobacterium
OTU_1073	0	0	0	0	0	0	6.97399e-05	0	0	0	0	0	0	0	0	0	0	0	0	0	0	0	0	0	0	0	0	0	0	0	0	0	0	0	0	0	k__Bacteria;p__Firmicutes;c__Clostridia
OTU_1074	0	0	0	0	0	0	8.71748e-05	0	0	0	0	0	0	0	0	0	0	0	0	0	0	0	0	0	1.7435e-05	0	0	1.7435e-05	0	0	0	0	0	1.7435e-05	0	0	k__Bacteria;p__Firmicutes;c__Clostridia;o__Lachnospirales;f__Lachnospiraceae;g__Coprococcus
OTU_1075	0	0	3.48699e-05	0	5.23049e-05	0	0	0	0	0	0	1.7435e-05	0	0	0	0	0	1.7435e-05	0	0	0	0	0	0	0	0	1.7435e-05	0	0	0	0	6.97399e-05	0	0	0	0	k__Bacteria;p__Proteobacteria;c__Alphaproteobacteria;o__Azospirillales;f__Inquilinaceae;g__Inquilinus;s__
OTU_1076	0	0	0	0	0	0	0	0	0	0	0	0	0	0	8.71748e-05	0	0	0	0	0	0	0	0	0	0	0	0	0	0	0	0	0	0	0	1.7435e-05	0	k__Bacteria;p__Myxococcota;c__Polyangia
OTU_1077	0	0	0	0	0	0	0	3.48699e-05	1.7435e-05	0	0	0	0	0	0	0	0	0	0	0	0	0	0	0	0	0	0	0	0	0	0	0	0	0	0	0	Unknown
OTU_1078	0	0	0	0	0	0	0	0	0	0	0	0	0	0	0	0	1.7435e-05	0	0	0	0	0	0.00010461	0	0	0	0	0	0	0	0	0	5.23049e-05	0	0	0	k__Bacteria;p__Proteobacteria;c__Alphaproteobacteria;o__Sphingomonadales;f__Sphingomonadaceae;g__Sphingomonas
OTU_1079	0	0	0	0	0	0	0	0	0	0	0	0	6.97399e-05	0	0	0	0	5.23049e-05	0	0	0	0	0.00010461	0	0	0	0	0	0	0	0	0	0	0	0	0	k__Bacteria;p__Proteobacteria;c__Gammaproteobacteria;o__Burkholderiales;f__Nitrosomonadaceae;g__MND1;s__
OTU_1080	0	0	0	0	3.48699e-05	3.48699e-05	0	0	0	0	0	0	0	0	0	0	0	0	0	0	0	0	5.23049e-05	0	0	3.48699e-05	1.7435e-05	0	0	0	0	0	3.48699e-05	0	0	0	k__Bacteria;p__Chloroflexi;c__TK10;o__;f__;g__;s__
OTU_1081	0	0	0	0	0	5.23049e-05	0	0	0	0	0	0	0	0	0	0	0	0	0	1.7435e-05	0	0	0	0	0	0	6.97399e-05	0	0	0	0	0	0	0	0	0	k__Bacteria
OTU_1082	0	0	0	0	0	0	0	1.7435e-05	0	0	1.7435e-05	0	0	0	0	0	3.48699e-05	0	0	0	0	0	0	0	0	0	0	0	0	0	0	0	0	0	3.48699e-05	0	k__Bacteria;p__Bacteroidota;c__Bacteroidia;o__Bacteroidales;f__Prevotellaceae;g__Prevotellaceae_NK3B31_group;s__
OTU_1083	0	0	0	0	0	0	0	0	0	0	0	0	0.000156915	0	0	0	0	0	0	0	0	0	0	0	0	0	0	0	0	0	0	0	0	0	0	0	k__Bacteria;p__Proteobacteria;c__Gammaproteobacteria;o__Cellvibrionales;f__Cellvibrionaceae;g__Cellvibrio
OTU_1084	0	0	0	0	0	0	0	8.71748e-05	5.23049e-05	0	0	0	0	0	0	0	0	0	0	0	0	0	0	0	0	0	0	0	0	0	0	0	0	0	0	0	k__Bacteria;p__Actinobacteriota;c__Coriobacteriia;o__Coriobacteriales;f__Eggerthellaceae;g__Enterorhabdus;s__
OTU_1085	0	1.7435e-05	0	0	0	3.48699e-05	0	0	0	0	1.7435e-05	0	0	0	0	0	3.48699e-05	0	0	3.48699e-05	0	0	3.48699e-05	0	0	0	1.7435e-05	0	0	1.7435e-05	0	0	0	0	0	6.97399e-05	k__Bacteria;p__Armatimonadota;c__Fimbriimonadia;o__Fimbriimonadales;f__Fimbriimonadaceae;g__;s__
OTU_1086	0	0	0	0	0	0	0	1.7435e-05	1.7435e-05	0	0	0	1.7435e-05	0	0	0	0	0	0	3.48699e-05	0	0	0	0	0	0	0	0	0	0	0	0	0	0	0	0	k__Bacteria;p__Firmicutes;c__Clostridia;o__Oscillospirales;f__UCG-010;g__;s__
OTU_1087	0	0	0	0	0	0	0	5.23049e-05	0	3.48699e-05	0	0	0	0	0	0	0	0	0	0	0	0	0	0	3.48699e-05	0	0	3.48699e-05	0	0	3.48699e-05	0	0	0	0	0	k__Bacteria;p__Proteobacteria;c__Gammaproteobacteria;o__Competibacterales;f__Competibacteraceae;g__Candidatus_Competibacter;s__
OTU_1088	0	0	0	5.23049e-05	0	0	8.71748e-05	0	0	0	0	0	0	0	0	0	0	0	0	0	0	0	0	0	0	0	0	0	0	0	0	0	0	0	0	0	k__Bacteria;p__Proteobacteria
OTU_1089	0	0	0	0	0	0	0	0	0	0	0	0	0	0	1.7435e-05	0	6.97399e-05	0	0	0.00010461	3.48699e-05	0	0	0	0	0	0	0	0	5.23049e-05	0	8.71748e-05	0	0	0	0	k__Bacteria;p__Fibrobacterota;c__Fibrobacteria;o__Fibrobacterales;f__Fibrobacteraceae;g__possible_genus_04;s__
OTU_1090	0	0	0	0	0	1.7435e-05	0	0	0	0	0.000941488	0	0	5.23049e-05	0	0	0	0	0	0	0	0	0	0	0	0	0	0	0	0	0	0	0	0	0.000819443	0	k__Bacteria;p__Cyanobacteria;c__Cyanobacteriia;o__Chloroplast;f__unidentified_Chloroplast;g__unidentified_Chloroplast;s__Physcomitrella_patens
OTU_1091	0	0	0	0	0	0	0	0	0	0	0	0	0	0	0	0	0	0	0	0	0	0	0	0	0	0	0	8.71748e-05	0	0	0	0	0	0	0	0	k__Bacteria;p__Proteobacteria;c__Gammaproteobacteria;o__Enterobacterales;f__Enterobacteriaceae;g__Enterobacter
OTU_1092	0	0	0	0.000122045	0	0	0	0	0	0	0	0	0	0	0	0	0	0	0	0	0	0	0	0	0	0	0	0	0	0	0	0	0	3.48699e-05	0	0	k__Bacteria
OTU_1093	0	0	0	0	0	0	0	0	0	0	0	0	0	0	0	0	0	0	0	0	0	0	0	0	0	0	0	6.97399e-05	0	0	0	0	0	0	0	0	k__Bacteria
OTU_1094	0	0	0	0	0	1.7435e-05	0	0	0	0	0	0	0	0	0	0	1.7435e-05	0	0	0	1.7435e-05	0	0	0	0	0	0	0	0	1.7435e-05	0	1.7435e-05	0	0	0	0	k__Bacteria;p__Chloroflexi;c__TK10;o__;f__;g__;s__
OTU_1095	0	0	0	0	0	0	0	0	0	0	0	0	0	0	0	0	0	0	0	0	0	0	5.23049e-05	0	0	0	0	0	0	0	0	0	0	0	0	0	k__Bacteria
OTU_1096	0	1.7435e-05	0	0	0	0	8.71748e-05	0	0	0	0	0	0	6.97399e-05	0	0	0	0	0	0	0	0	0	0	3.48699e-05	0	0	0	0	0	0	0	0	0	0	0	k__Bacteria;p__Firmicutes;c__Bacilli;o__Lactobacillales
OTU_1097	0	0	0	1.7435e-05	0	0	0	0	0	0	0	0	0	0	0	0	0	0	0	0	0	0	0	0	0	0	0	3.48699e-05	0	0	0	0	0	3.48699e-05	0	0	k__Bacteria;p__Actinobacteriota;c__Acidimicrobiia;o__Microtrichales;f__Iamiaceae;g__Iamia;s__
OTU_1098	5.23049e-05	0	0	0.00013948	0	0	0.000296394	0	0	1.7435e-05	0	0	0	0	0	0	0	0	0	0	0	0	0	0	0	0	0	0.000122045	0	0	0.000418439	0	0	0.00017435	0	0	k__Bacteria;p__Proteobacteria;c__Gammaproteobacteria;o__Burkholderiales;f__Oxalobacteraceae
OTU_1099	0	0	0	0	0	0	0	0	0.000122045	0	8.71748e-05	0	0	0	0	0	0	0	0	0	0	0	0	0	0	0	0	0	0	0	0	0	0	0	8.71748e-05	0	k__Bacteria;p__Firmicutes;c__Clostridia;o__Lachnospirales;f__Lachnospiraceae;g__Lachnospiraceae_UCG-001;s__
OTU_1100	0	0	0	0	0	0	1.7435e-05	0	0	3.48699e-05	0	0	0	0	0	0	0	0	0	0	0	0	0	0	0	0	0	1.7435e-05	0	0	0	0	0	0	0	0	k__Bacteria
OTU_1101	0	0	0	0	0	0	0	0	0	0	0	0	0	0	0	0	0	1.7435e-05	0	0	0	0	8.71748e-05	1.7435e-05	0	0	1.7435e-05	0	0	0	0	0	0	0	0	0	k__Bacteria;p__Actinobacteriota;c__Thermoleophilia;o__Gaiellales;f__Gaiellaceae;g__Gaiella;s__
OTU_1102	3.48699e-05	1.7435e-05	0.00013948	3.48699e-05	6.97399e-05	5.23049e-05	0	0	0	5.23049e-05	3.48699e-05	5.23049e-05	0	6.97399e-05	5.23049e-05	0	8.71748e-05	0.00010461	0	0	3.48699e-05	0	5.23049e-05	0	8.71748e-05	8.71748e-05	0.00013948	0.00010461	0	1.7435e-05	0.00013948	0.000156915	1.7435e-05	8.71748e-05	1.7435e-05	0.00013948	k__Bacteria;p__Proteobacteria;c__Gammaproteobacteria;o__Burkholderiales;f__Comamonadaceae
OTU_1103	0	0	0	0	0	0	0	0	0	0	0	0	0	0	0	0	0	1.7435e-05	0	0	0	0	0	0	0	0	3.48699e-05	0	0	0	0	0	0	0	0	0	k__Bacteria;p__Cyanobacteria;c__Vampirivibrionia;o__Vampirovibrionales;f__Vampirovibrionaceae;g__;s__
OTU_1104	0	3.48699e-05	0	0	0	0	0	0	0	0	0	0	0	0	0	0	8.71748e-05	0	0	0	0	0	0	0	0	0	0	0	0	0	0	0	1.7435e-05	0	0	0	k__Bacteria;p__Bdellovibrionota;c__Bdellovibrionia;o__Bdellovibrionales;f__Bdellovibrionaceae;g__;s__
OTU_1105	0	0	0	0	0	0	0	6.97399e-05	0	0	0	0	0	0	0	0	0	0	0	0	0	0	0	0	0	0	5.23049e-05	0	0	0	0	0	0	0	0	0	k__Bacteria;p__Firmicutes;c__Bacilli;o__Lactobacillales;f__Streptococcaceae;g__Lactococcus;s__Lactococcus_lactis
OTU_1106	0	0	0	0	0	0	0	0	0	0	0	0	0	0	0	0	0	6.97399e-05	0	0	0	0	0	0	0	0	0	0	0	0	0	0	0	0	0	0	k__Bacteria;p__unidentified_Bacteria;c__Alphaproteobacteria;o__Micavibrionales;f__;g__;s__
OTU_1107	0	0	0	5.23049e-05	0	0	1.7435e-05	0	0	6.97399e-05	0	0	0	0	0	0	0	0	0	0	0	0	0	0	0.000261525	0	0	0	0	0	6.97399e-05	0	0	0.00010461	0	0	k__Bacteria;p__Proteobacteria;c__Gammaproteobacteria;o__Burkholderiales;f__Rhodocyclaceae;g__Candidatus_Accumulibacter;s__
OTU_1108	0	0	0	0	0	3.48699e-05	0	0	0	0	0	0	0	0	3.48699e-05	0	0	0	0	3.48699e-05	0	0	0	0	0	0	0	0	0	0	0	0	0	0	0	0	k__Bacteria;p__unidentified_Bacteria;c__Alphaproteobacteria;o__unidentified_Alphaproteobacteria;f__unidentified_Alphaproteobacteria;g__unidentified_Alphaproteobacteria;s__bacterium_Ellin6089
OTU_1109	0	0	0	0	0	0	0	8.71748e-05	1.7435e-05	0	0	0	5.23049e-05	0	0	0	0	0	0	0	0	0	0	0	0	0	0	0	0	0	0	0	0	0	0	0	k__Bacteria;p__unidentified_Bacteria;c__Bacilli;o__Erysipelotrichales;f__Erysipelotrichaceae;g__;s__
OTU_1110	0	0	0	0	0	3.48699e-05	0	0	0	0	0	0	0.00024409	0	0	0	0	0	0	3.48699e-05	0	0	0	0	0	0	0	0	0	0	0	0	0	0	3.48699e-05	0	k__Bacteria;p__Proteobacteria;c__Alphaproteobacteria;o__Dongiales;f__Dongiaceae;g__Dongia;s__
OTU_1111	0	0	0	0	0	0	0	8.71748e-05	0	0	0	0	0	0	0	0	0	0	0	0	0	0	0	0	0	0	0	0	0	0	0	0	0	0	0	0	k__Bacteria;p__Firmicutes;c__Clostridia;o__Peptococcales;f__Peptococcaceae;g__Peptococcus;s__
OTU_1112	0	0	1.7435e-05	0	0	0	0	0	0	0	0	0	0	0	0	0	0	0	0	0.00010461	0	0	0	0	0	0	0	0	0	0	0	5.23049e-05	0	0	0	0	k__Bacteria;p__Chloroflexi;c__Anaerolineae;o__SBR1031;f__A4b;g__;s__
OTU_1113	0	3.48699e-05	6.97399e-05	0	0	0	0	0	0	0	0	0	0	0	0	0	0	0	0	0	3.48699e-05	0	0	0	0	0	0	0	0	0	0	0	0	0	0	0	k__Bacteria;p__Bacteroidota;c__Bacteroidia;o__Chitinophagales;f__Chitinophagaceae;g__Edaphobaculum;s__
OTU_1114	0	0.000122045	5.23049e-05	0	0	0	0	0	0	0	0	0	0	6.97399e-05	0	0	0	0	0	0	0	0	3.48699e-05	0	0	0	0	0	0	0	0	0	6.97399e-05	0	0	0	k__Bacteria;p__Myxococcota;c__Polyangia;o__Polyangiales;f__Polyangiaceae;g__Pajaroellobacter;s__
OTU_1115	0	0	0	0	0	0	0	0	0	0	0	0	5.23049e-05	0	0	0	0	0	0	0	0	0	0	0	0	0	0	0	0	0	0	0	0	0	0	0	k__Bacteria;p__Methylomirabilota;c__Methylomirabilia;o__Rokubacteriales;f__;g__;s__
OTU_1116	0	6.97399e-05	0	0	0	0	0	0	0	0	0	0	0	0	0	0	0	0	0	0	0	0	0	0	0	0	0.00010461	0	0	0	0	0	0	0	0	0	k__Bacteria;p__Verrucomicrobiota;c__Verrucomicrobiae;o__Chthoniobacterales;f__Chthoniobacteraceae;g__Chthoniobacter;s__
OTU_1117	0	0	0	0	0	0	0	5.23049e-05	6.97399e-05	0	0	0	0	0	0	0	0	0	3.48699e-05	0	0	0	0	0	0	0	0	0	0	0	0	0	0	0	0	0	k__Bacteria
OTU_1118	0	0	0	0	0	0	0	0	8.71748e-05	0	0	0	0	0	0	0	0	0	0	0	0	0	0	0	0	0	0	0	0	0	0	0	0	0	0	0	k__Bacteria;p__Firmicutes;c__Clostridia;o__Lachnospirales;f__Lachnospiraceae
OTU_1119	0	3.48699e-05	1.7435e-05	0	0	3.48699e-05	0	0	0	0	3.48699e-05	0	0	0	0	0	0	0	0	6.97399e-05	0	0	0	0	0	0	0	0	0	0	0	6.97399e-05	0	0	3.48699e-05	3.48699e-05	k__Bacteria;p__Proteobacteria;c__Alphaproteobacteria;o__Acetobacterales;f__Acetobacteraceae
OTU_1120	5.23049e-05	0	0	0	1.7435e-05	0	1.7435e-05	0	0	0	1.7435e-05	1.7435e-05	1.7435e-05	3.48699e-05	3.48699e-05	0	0.00010461	6.97399e-05	0	0.000156915	5.23049e-05	6.97399e-05	1.7435e-05	3.48699e-05	3.48699e-05	0	5.23049e-05	0.000122045	0.00010461	8.71748e-05	8.71748e-05	8.71748e-05	6.97399e-05	1.7435e-05	1.7435e-05	0	k__Bacteria;p__Firmicutes;c__Bacilli;o__Lactobacillales;f__Enterococcaceae;g__Enterococcus;s__Enterococcus_sp_FDAARGOS_375
OTU_1121	0	0	1.7435e-05	0	0	0	0	0	0	0	0	1.7435e-05	0	0	0	0	0	0	0	0	0	0	0	0	0	0	1.7435e-05	0	0	0	0	0	0	0	0	1.7435e-05	k__Bacteria;p__Firmicutes;c__Bacilli;o__Paenibacillales;f__Paenibacillaceae;g__Paenibacillus
OTU_1122	0	0	0	0	0	0	0	0	0	0	0	3.48699e-05	0	0	0	0	0	0	0	0	0	0	0	1.7435e-05	0	0	0	0	0	0	0	0	0	0	0	0	k__Bacteria;p__Proteobacteria;c__Gammaproteobacteria;o__Xanthomonadales;f__Rhodanobacteraceae;g__Rhodanobacter;s__
OTU_1123	0	0	0	0	0	0	0	1.7435e-05	8.71748e-05	0	0	0	0	0	0	0	0	0	0	0	0	0	0	0	0	0	0	0	0	0	0	0	0	0	0	0	k__Bacteria;p__Firmicutes;c__Clostridia;o__Lachnospirales;f__Lachnospiraceae
OTU_1124	0	0	0	0	0	0	1.7435e-05	0	0	0	0	0	0	0	0	0	0	0	0	0	0	0	0	0	3.48699e-05	0	0	1.7435e-05	0	0	5.23049e-05	0	0	0	0	0	k__Bacteria;p__Proteobacteria;c__Gammaproteobacteria;o__Burkholderiales;f__Burkholderiaceae;g__Lautropia;s__
OTU_1125	0	0	0	8.71748e-05	0	0	0	0	0	0	0	0	0	0	0	0	0	0	0	0	0	0	0	0	0	0	0	0	0	0	0	0	0	0	0	0	k__Bacteria
OTU_1126	0	0	0	0	0	0	0	0	6.97399e-05	0	0	0	0	3.48699e-05	0	1.7435e-05	0	1.7435e-05	0	0	0.000278959	0	0	0	0	0	0	0	0	0	0	0	0	0	0	0	k__Bacteria;p__Actinobacteriota;c__Actinobacteria;o__Corynebacteriales;f__Corynebacteriaceae;g__Corynebacterium
OTU_1127	0	3.48699e-05	1.7435e-05	0	3.48699e-05	0	0	0	1.7435e-05	6.97399e-05	0	3.48699e-05	3.48699e-05	0	0	0	0.00010461	1.7435e-05	0	0	0	0	0	1.7435e-05	0	0	6.97399e-05	0	0	0	0	0.00010461	3.48699e-05	3.48699e-05	1.7435e-05	0	k__Bacteria;p__Proteobacteria;c__Alphaproteobacteria;o__Sphingomonadales;f__Sphingomonadaceae;g__Sphingosinicella;s__
OTU_1128	0	0	0	0	0	0	0	0.00010461	3.48699e-05	0	0	0	0	0	0	0	0	0	0	0	0	0	0	0	0	0	0	0	0	0	0	0	0	0	0	0	k__Bacteria;p__unidentified_Bacteria;c__Clostridia;o__Lachnospirales;f__Lachnospiraceae;g__;s__
OTU_1129	0	0	0	0	0	0	0	8.71748e-05	0	0	0	0	0	0	0	0	0	0	0	0	0	0	0	0	0	0	0	0	0	0	0	0	0	0	0	0	k__Bacteria;p__Proteobacteria
OTU_1130	0	0	5.23049e-05	0	0	0	0	0	0	0	0	0	0	0	5.23049e-05	0	0	0	0	0	0	0	0	0	0	0	0	0	0	0	0	0	0	0	0	0	k__Bacteria;p__Planctomycetes;c__unidentified_Planctomycetes;o__Gemmatales;f__Gemmataceae;g__Gemmata
OTU_1131	0	0	3.48699e-05	0	0	0	0	0	0	0	0	0	0	0	5.23049e-05	0	0	0	0	5.23049e-05	3.48699e-05	0	0	0	0	0	0	0	0	1.7435e-05	0	0	1.7435e-05	0	0	0	k__Bacteria;p__Actinobacteriota;c__Acidimicrobiia;o__Microtrichales;f__Iamiaceae;g__Iamia;s__
OTU_1132	0	0	0	0	0	0	0	0.00193528	0.00129019	0	0	0	6.97399e-05	0	0	0	0	0	0	0	0	0	0	0	0	0	0	0	0	0	0	0	0	0	0	0	k__Bacteria
OTU_1133	5.23049e-05	0	0	0	0	0	0	0	0	0	0	0	0	0	0	0	0	0	0	0	0	0	0	0	0	0	0	0	0	0	0	0	0	5.23049e-05	0	0	k__Bacteria;p__unidentified_Bacteria;c__Alphaproteobacteria;o__;f__;g__;s__
OTU_1134	0	0	0	0.000122045	0	0	3.48699e-05	0	0	0	0	0	0	0	0	0	0	0	0	0	0	0	0	0	0	0	0	0	0	0	0	0	0	0	0	0	k__Bacteria
OTU_1135	0	0	5.23049e-05	0	0	0	0	0	0	0	0	0	0	0	0	0	0	0	0	0	0	0	6.97399e-05	0	0	0	5.23049e-05	0	0	0	0	0	0	0	0	0	k__Bacteria;p__Actinobacteriota;c__Actinobacteria;o__Propionibacteriales;f__Nocardioidaceae;g__Nocardioides
OTU_1136	0	0	3.48699e-05	0	0	0	0	0	0	0	0	0	0	0	3.48699e-05	0	0	0	0	0	0	0	0	1.7435e-05	0	0	0	0	0	0	0	0	0	0	0	0	k__Bacteria;p__Proteobacteria;c__Alphaproteobacteria;o__Rhizobiales;f__Beijerinckiaceae;g__Camelimonas;s__
OTU_1137	0	0	0	0	0	0	0	1.7435e-05	0	0	0	0	0	0	0	0	0	0	0	5.23049e-05	0	0	0	0	0	0	0	0	0	0	0	0	0	0	0	0	k__Bacteria
OTU_1138	0	0	0	0	8.71748e-05	0	0	0	0	0	0	0	0	0	0	0	0	0	0	0	0	0	0	0	0	6.97399e-05	0	0	0	0	0	0	0	0	5.23049e-05	0	k__Bacteria;p__Bacteroidota;c__Bacteroidia;o__Sphingobacteriales;f__Sphingobacteriaceae;g__Mucilaginibacter
OTU_1139	0	0	0	0	0	0	0	0	0.00020922	0	0	0	0	0	0	0	0	0	0	0.00010461	0	0	0	0	0	0	0	0	0	0	0	0	0	0	0	0	k__Bacteria;p__Firmicutes;c__Clostridia;o__Lachnospirales;f__Lachnospiraceae;g__Lachnospiraceae_NK4A136_group;s__
OTU_1140	0	3.48699e-05	0	0	0	0	0	0	0	0	0	0	0	0	3.48699e-05	0	0.00010461	0	0	3.48699e-05	0	0	0	0	0	0	0	0	0	0	0	0	0	0	1.7435e-05	0	k__Bacteria;p__Actinobacteriota;c__Actinobacteria;o__Micrococcales;f__Micrococcaceae;g__Arthrobacter
OTU_1141	0	0	0	0	0	0	0	0	0	0	0	0	0	0	0	0	0	0	0	0.00010461	0	0	0	0	0	0	0	0	0	0	0	0	0	0	0	0	k__Bacteria;p__Proteobacteria;c__Gammaproteobacteria;o__Legionellales;f__Legionellaceae;g__Legionella;s__
OTU_1142	0	0	0	0	0	0	0	0	3.48699e-05	0	0	0	0	0	0	0	0	0	0	0	0	0	0	0	0	0	0	0	0	0	0	0	0	0	0	0	k__Bacteria
OTU_1143	0	0	0	0	0	0	0	3.48699e-05	0	0	0	0	0	0	0	0	0	0	0	0	0	0	0	0	0	0	0	0	0	0	0	0	0	0	0	0	k__Bacteria
OTU_1144	0	0	0	0	3.48699e-05	0	0	0	0	0	0	3.48699e-05	0	1.7435e-05	1.7435e-05	0	0	1.7435e-05	0	8.71748e-05	0	0	0	0	0	1.7435e-05	0	0	0	0	0	0	0	0	5.23049e-05	5.23049e-05	k__Bacteria;p__Proteobacteria;c__Gammaproteobacteria;o__unidentified_Gammaproteobacteria;f__unidentified_Gammaproteobacteria;g__Acidibacter;s__
OTU_1145	3.48699e-05	0	0	0	0	0	0	0	0	0	0	0	0	0	0	0	0.00010461	0	0	0	0	0	0	0	0	0	0	0	0	0	1.7435e-05	0	0	5.23049e-05	0	0	k__Bacteria;p__Proteobacteria;c__Gammaproteobacteria;o__Xanthomonadales;f__Rhodanobacteraceae;g__Chiayiivirga;s__
OTU_1146	0	1.7435e-05	0	0	0	0	0	0	0	0	0	0	0	0	0	0	3.48699e-05	0	0	0	0	0	0	0	0	5.23049e-05	0	0	0	0	0	0.000261525	0	0	0	0	k__Bacteria;p__unidentified_Bacteria;c__Bacteroidia;o__Chitinophagales;f__Saprospiraceae;g__;s__
OTU_1147	0	0	1.7435e-05	0	0	0	0	0	0	0	0	5.23049e-05	0	0	0	0	0	5.23049e-05	0	5.23049e-05	0	0	0	0	0	0	5.23049e-05	0	0	0	0	0	0	0	0	0	k__Bacteria;p__Proteobacteria;c__Gammaproteobacteria;o__Burkholderiales;f__Oxalobacteraceae;g__Duganella
OTU_1148	0	0	0	0	0	0	0	8.71748e-05	5.23049e-05	0	0	0	0	0	0	0	0	0	1.7435e-05	0	0	0	0	0	0	0	0	0	0	0	0	0	0	0	0	0	k__Bacteria;p__Firmicutes;c__Clostridia;o__Oscillospirales
OTU_1149	0	0	0	0	0	0	0	0	0	0	1.7435e-05	0	0	0	0	0	5.23049e-05	0	0	0	0	0	0	0	0	0	0	0	0	0	0	0	0	0	0	0	k__Bacteria
OTU_1150	0	0	0	0	0	0	0	0	0	0	0	0	0	0	0	0	0	0	0	0	0	0	0	0	0	0	0	5.23049e-05	0	0	0	0	0	0	0	0	k__Bacteria;p__Proteobacteria;c__Alphaproteobacteria
OTU_1151	0	0	0	0	0	0	0	0	0	0	0	0	0	0	0	0	0	0	0	0	0	0	0	0	5.23049e-05	0	0	0	0	0	0	0	0	0	0	0	k__Bacteria;p__Proteobacteria;c__Gammaproteobacteria;o__Burkholderiales;f__Rhodocyclaceae
OTU_1152	0	0	1.7435e-05	0	3.48699e-05	6.97399e-05	0	0	0	0	3.48699e-05	5.23049e-05	0	0	1.7435e-05	0	0	0	0	6.97399e-05	0	0	0	0	0	0.000122045	1.7435e-05	0	0	0	0	0	0	0	0.000122045	1.7435e-05	k__Bacteria;p__Actinobacteriota;c__Actinobacteria;o__Pseudonocardiales;f__Pseudonocardiaceae;g__Amycolatopsis
OTU_1153	0	0	0	0	0	0	0	0	0	0	0	0	0	0	0	0	0	3.48699e-05	0	1.7435e-05	0	0	0	0	0	0	0	0	0	0	0	0	0	0	0	0	k__Bacteria
OTU_1154	0	0	0	0	0	0	0	8.71748e-05	5.23049e-05	0	0	0	0	0	0	0	0	0	0	0	0	0	0	0	0	0	0	0	0	0	0	0	0	0	0	0	k__Bacteria;p__Firmicutes;c__Clostridia;o__Oscillospirales;f__Butyricicoccaceae;g__UCG-009;s__
OTU_1155	0	0	0	3.48699e-05	0	0	0	0	0	1.7435e-05	0	0	0	0	0	0	0	0	0	0	0	0	0	0	0.000156915	0	0	3.48699e-05	0	0	0.000191785	0	0	8.71748e-05	0	0	k__Bacteria;p__Proteobacteria;c__Gammaproteobacteria;o__Competibacterales;f__Competibacteraceae;g__Candidatus_Competibacter;s__
OTU_1156	0	0	0	0	0	1.7435e-05	0	0	0	0	0	0	0	0	0	0	0	0	0	5.23049e-05	0	0	0	0	0	0	3.48699e-05	0	0	0	0	1.7435e-05	1.7435e-05	0	0	0	k__Bacteria;p__MBNT15;c__;o__;f__;g__;s__
OTU_1157	0	0	0	0	0	0	3.48699e-05	0	0	0	0	0	0	0	0	0	0	0	0	0	0	0	0	0	0	0	0	0	0	0	0	0	0	0	0	0	k__Bacteria
OTU_1158	0	0	0	0	0	0	6.97399e-05	0	0	0	0	0	0	0	0	0	0	0	0	0	0	0	0	0	0	0	0	0	0	0	1.7435e-05	0	0	0	0	0	k__Bacteria;p__Firmicutes;c__Clostridia;o__Christensenellales;f__Christensenellaceae;g__Christensenellaceae_R-7_group;s__
OTU_1159	0	0	0	0	0	0	0	0	0	0	0	6.97399e-05	0	0	0	0	0	0	0	3.48699e-05	0	0	0	0	0	0	0	0	0	0	0	0	0	0	0	5.23049e-05	k__Bacteria;p__unidentified_Bacteria;c__Acidobacteriae;o__Acidobacteriales;f__;g__;s__
OTU_1160	0	0	0	0	0	0	3.48699e-05	0	0	0	0	0	0	0	0	0	0	0	0	0	0	0	0	0	0	0	0	0	0	0	0	0	0	0	0	0	k__Bacteria
OTU_1161	0	0	0	0	0	0	0	0.00013948	0.000156915	0	0	0	0	0	0	0	0	0	0	0	0	0	0	0	0	0	0	0	0	0	0	0	0	0	0	0	k__Bacteria;p__Actinobacteriota;c__Coriobacteriia;o__Coriobacteriales;f__Eggerthellaceae;g__Enterorhabdus;s__
OTU_1162	0	8.71748e-05	1.7435e-05	0	0	0	0	0	0	0	1.7435e-05	0	0	3.48699e-05	6.97399e-05	0	0	0	0	0	3.48699e-05	0	0.000122045	0	0	0	0	0	0	1.7435e-05	0	1.7435e-05	0.00017435	0	5.23049e-05	1.7435e-05	k__Bacteria;p__Myxococcota;c__Polyangia;o__Haliangiales;f__Haliangiaceae;g__Haliangium;s__
OTU_1163	0	0	0	0	0	0	0	0	0	0	0	0	0	0	0	0	0	0	0	5.23049e-05	0	0	0	0	0	0	0	0	0	0	0	0	0	0	0	0	k__Bacteria;p__Actinobacteriota;c__Actinobacteria
OTU_1164	0	0	0	0	0	0	0	6.97399e-05	0	0	0	1.7435e-05	3.48699e-05	0	0	0	0	0	0	0	0	0	0	0	0	0	0	0	0	0	0	0	0	0	0	0	k__Bacteria;p__unidentified_Bacteria;c__Alphaproteobacteria;o__Elsterales;f__;g__;s__
OTU_1165	0	0	0	0	0	0	0	0	0	0	0	0	0	0	0	0	0	0	0	0	0	0	0	0	0.000191785	0	0	0	0	0	0	0	0	0	0	0	k__Bacteria
OTU_1166	0	0	0	0	0	0	0	0	0	0	0	0	0	0	0	0	0	0	0	0	1.7435e-05	0	0	1.7435e-05	0	0	0	0	0	0	0	1.7435e-05	0	0	1.7435e-05	0	k__Bacteria;p__unidentified_Bacteria;c__Babeliae;o__Babeliales;f__Vermiphilaceae;g__;s__
OTU_1167	0	0	1.7435e-05	0	1.7435e-05	0	0	0	0	0	5.23049e-05	0	0	0	0	0	0	3.48699e-05	0	0	0	0	0	0	0	0	0	0	0	0	0	0	0	0	8.71748e-05	0	k__Bacteria;p__Actinobacteriota;c__Actinobacteria;o__Streptosporangiales;f__;g__;s__
OTU_1168	0	0	0	0	0	0	0	0.00010461	1.7435e-05	0	3.48699e-05	0	0	0	0	0	0	0	0	0	0	0	0	0	0	0	0	0	0	0	0	0	0	0	1.7435e-05	0	k__Bacteria;p__Bacteroidota;c__Bacteroidia;o__Bacteroidales;f__Rikenellaceae;g__Alistipes;s__Alistipes_sp_cv1
OTU_1169	0	0	0	0	0	0	0	0	0	0	0	0	0	0	0	0	0	0	0	0	0	0	0	0	0	0	0	8.71748e-05	0	0	0	0	0	0	0	0	k__Bacteria
OTU_1170	0	0	0	3.48699e-05	0	0	0	0	0	0	0	0	0	0	0	0	0	0	0	0	0	0	0	0	1.7435e-05	0	0	0	0	0	0	0	0	0	0	0	k__Bacteria
OTU_1171	0	0	0	0	0	0	0	0	0	0	0	0	0	0	0	0	0	0	0	0	0	0	0	0	0	0	0	0	0	0	0	0	0	3.48699e-05	0	0	k__Bacteria
OTU_1172	0	0	3.48699e-05	0	0	5.23049e-05	0	0	0	0	6.97399e-05	0	1.7435e-05	6.97399e-05	5.23049e-05	0	8.71748e-05	0	0	0.00013948	0	0	5.23049e-05	0	0	0	1.7435e-05	0	0	1.7435e-05	0	0.000156915	5.23049e-05	0	3.48699e-05	0	k__Bacteria;p__Proteobacteria;c__Alphaproteobacteria;o__Caulobacterales;f__Caulobacteraceae;g__Phenylobacterium;s__
OTU_1173	0	0	0	0	0	0	0	0	0	0	0	0	5.23049e-05	0	0	0	0	0	0	0	0	0	0	0	0	0	0	0	0	0	0	0	0	0	0	0	k__Bacteria;p__unidentified_Bacteria;c__unidentified_Bacteria;o__Gemmatimonadales;f__Gemmatimonadaceae;g__;s__
OTU_1174	0	0	0	0	0	0	0	3.48699e-05	0	0	0	0	0	0	0	0	0	0	0	1.7435e-05	0	0	0	0	0	0	0	0	0	0	0	0	0	0	0	0	k__Bacteria
OTU_1175	3.48699e-05	3.48699e-05	0	0.000156915	1.7435e-05	0	1.7435e-05	3.48699e-05	0	1.7435e-05	0	0	0	3.48699e-05	3.48699e-05	0	8.71748e-05	0	8.71748e-05	0	8.71748e-05	0.000191785	6.97399e-05	1.7435e-05	8.71748e-05	5.23049e-05	0	6.97399e-05	0	0	0.00013948	0	3.48699e-05	1.7435e-05	1.7435e-05	8.71748e-05	k__Bacteria;p__Proteobacteria;c__Gammaproteobacteria;o__Enterobacterales;f__Enterobacteriaceae
OTU_1176	0	0	0	0	0	0	0	0	0	0	0	0	0	0	0	0	0	0	0	0	3.48699e-05	0	0	0	0	0	0	0	0	0	0	0	0	0	1.7435e-05	0	k__Bacteria;p__Firmicutes;c__Clostridia;o__unidentified_Clostridia;f__Gracilibacteraceae;g__Gracilibacter;s__
OTU_1177	0	0	0	0	0	0	0	0	0	0	0	0	0.00010461	0	0	0	1.7435e-05	0	0	0	0	0	0	0	0	0	0	0	0	0	0	0	0	0	0	0	k__Bacteria
OTU_1178	0	0	0	0	0	0	0	0	0	0	5.23049e-05	0	0	0	0	0	0	0	0	0	0	0	0	0	0	0	0	0	0	0	0	0	0	0	3.48699e-05	0	k__Bacteria;p__Proteobacteria;c__Alphaproteobacteria;o__Rickettsiales;f__SM2D12;g__;s__
OTU_1179	0	0	0	0	0	3.48699e-05	0	0	0	0	0	0	0	0	0	0	0	1.7435e-05	0	0	0	0	6.97399e-05	0	0	0	0	0	0	1.7435e-05	0	0	6.97399e-05	0	0	1.7435e-05	k__Bacteria;p__Gemmatimonadetes;c__unidentified_Gemmatimonadetes;o__Gemmatimonadales;f__Gemmatimonadaceae;g__Gemmatimonas;s__
OTU_1180	0	0	0	0	0	0	0	0	0	0	0	0	5.23049e-05	0	0	0	0	0	0	0	0	0	0	0	0	0	0	0	0	0	0	0	0	0	0	0	k__Bacteria;p__Proteobacteria;c__Gammaproteobacteria;o__Burkholderiales;f__Rhodocyclaceae;g__Azoarcus;s__
OTU_1181	0	0	0	1.7435e-05	0	0	0	0	0	0	0	0	0	0	0	0	0	0	0	0	0	0	0	0	1.7435e-05	0	0	0	0	0	0	0	0	0	0	0	k__Bacteria;p__Proteobacteria;c__Gammaproteobacteria;o__Burkholderiales;f__Burkholderiaceae;g__Lautropia;s__
OTU_1182	0	0	0	0	0	0	0	0	0	0	0	0	0	0	0	0	0	0	0	0	0	0	0	0	0	0	0	3.48699e-05	0	0	0	0	0	1.7435e-05	0	0	k__Bacteria;p__Proteobacteria;c__Gammaproteobacteria;o__Burkholderiales;f__SC-I-84;g__;s__
OTU_1183	0	0	0	0	0	0	0	0	0	0	0	0	0	0	0	0	0	0	0	0	0	0	0	0	0	0	0	0	3.48699e-05	0	0	0	0	1.7435e-05	0	0	k__Bacteria;p__unidentified_Bacteria;c__Alphaproteobacteria;o__Paracaedibacterales;f__Paracaedibacteraceae;g__;s__
OTU_1184	0	0	0	0	1.7435e-05	3.48699e-05	0	0	0	0	0	8.71748e-05	0	0	0	0	0	0	0	0	0	0	0	0	0	0	0	0	3.48699e-05	0	0	3.48699e-05	0	0	0	0	k__Bacteria;p__Actinobacteriota;c__Actinobacteria;o__Frankiales;f__Frankiaceae;g__Jatrophihabitans;s__
OTU_1185	0	0	0	0	0	0	0	0	0	0	0	0	0	0	0	0	0	0	0	0	0	0	0	0	0	0	0	0	5.23049e-05	0	0	0	5.23049e-05	0	0	0	k__Bacteria;p__Cyanobacteria;c__Cyanobacteriia;o__Chloroplast;f__unidentified_Chloroplast;g__unidentified_Chloroplast
OTU_1186	0	0	0	0	0	0	0	0	0	0	0	0	0	0	0	0	0	0	0	5.23049e-05	0	0	0	0	0	1.7435e-05	0	0	0	0	0	0	0	0	0	0	k__Bacteria
OTU_1187	0	3.48699e-05	0	0	0	0	0	0	0	0	0	0	0	1.7435e-05	1.7435e-05	0	0	0	0	6.97399e-05	0	0	0	0	0	1.7435e-05	3.48699e-05	0	0	0	0	5.23049e-05	0	0	0	8.71748e-05	k__Bacteria;p__Bacteroidota;c__Bacteroidia;o__Chitinophagales;f__Chitinophagaceae;g__Edaphobaculum;s__
OTU_1188	0	0	0	0	0	0	0	0	0	0	3.48699e-05	0	0	0	0	0	0	0	0	0	0	0	1.7435e-05	0	0	0	1.7435e-05	0	0	0	0	0	0	0	0	0	k__Bacteria;p__Actinobacteriota;c__Actinobacteria;o__Streptomycetales;f__Streptomycetaceae;g__Streptomyces;s__Actinomycetales_bacterium_HO2017
OTU_1189	0	0	0	3.48699e-05	0	0	0	0	0	0	0	0	0	0	0	0	0	0	0	0	0	0	0	0	0	0	0	0	0	0	0	0	0	0	0	0	k__Bacteria;p__Myxococcota;c__Myxococcia;o__Myxococcales;f__Myxococcaceae
OTU_1190	0	0	0	0.00010461	0	0	0	0	0	0	0	0	0	0	0	0	0	0	0	0	0	0	0	0	0	0	0	0	0	0	0	0	0	0	0	0	k__Bacteria;p__Firmicutes;c__Bacilli;o__Paenibacillales;f__Paenibacillaceae;g__Paenibacillus;s__Paenibacillus_glucanolyticus
OTU_1191	0	0	5.23049e-05	0	0	0	0	0	0	0	0	0	0	0	0	0	0	0	0	0	0	0	0	0	0	0	0	0	0	0	0	0	1.7435e-05	0	0	0	k__Bacteria;p__Proteobacteria;c__Gammaproteobacteria;o__Xanthomonadales;f__Rhodanobacteraceae;g__Chiayiivirga;s__
OTU_1192	0	0	0	0	0	0	0	0	0	0	0	0	0	0	0	0	3.48699e-05	0	0	0.00010461	0	0	0	0	0	0	0	0	0	0	0	0	0	0	0	0	k__Bacteria;p__Bacteroidota;c__Bacteroidia;o__Sphingobacteriales;f__NS11-12_marine_group;g__;s__
OTU_1193	0	0	0	0	0	0	0	0	0	3.48699e-05	0	0	0	0	0	0	0	0	0	0	0	0	0	0	0	0	0	0	0	0	0	0	0	0	0	0	k__Bacteria;p__Proteobacteria;c__Gammaproteobacteria;o__Burkholderiales;f__Comamonadaceae;g__Acidovorax
OTU_1194	0	0	0	0	0	0	0	3.48699e-05	0	0	0	0	0	0	0	0	0	0	0	0	0	0	0	0	0	0	0	0	0	0	0	0	0	0	0	0	k__Bacteria;p__Firmicutes;c__Clostridia;o__Lachnospirales;f__Lachnospiraceae
OTU_1195	0	0	0	0	0	0	0	0	0	0	0	1.7435e-05	0	0	1.7435e-05	0	0	0	0	1.7435e-05	1.7435e-05	0	0	0	0	0	0	0	0	0	0	0	0	0	0	0	k__Bacteria;p__Actinobacteriota;c__Actinobacteria;o__Propionibacteriales;f__Nocardioidaceae;g__Nocardioides;s__Nocardioides_alkalitolerans
OTU_1196	0	0	0	0	0	0	5.23049e-05	0	0	0	0	0	0	0	0	0	0	0	0	0	0	0	0	0	0	0	0	0	0	0	0	0	0	0	0	0	k__Bacteria
OTU_1197	0	0	0	0	0	0	0	5.23049e-05	0	0	0	0	0	0	0	0	0	0	0	0	0	0	0	0	0	0	0	0	0	0	0	0	0	0	0	0	k__Bacteria;p__Firmicutes;c__Clostridia;o__Oscillospirales;f__Ruminococcaceae;g__Anaerofilum;s__
OTU_1198	0	0	0	0	0	0	0	0.00132506	0.00169119	0	0	0	1.7435e-05	0	0	5.23049e-05	8.71748e-05	0	0	0	0	1.7435e-05	0	0	0	0	0	0	0	0	0	0	0	0	1.7435e-05	0	k__Bacteria;p__Firmicutes;c__Clostridia;o__Lachnospirales;f__Lachnospiraceae
OTU_1199	0	0	3.48699e-05	0	0	0	0	0	0	0	0	0	0	0	0	0	0	0	0	0	0	0	0	0	0	0	0	0	0	0	0	0	0	0	0	0	k__Bacteria;p__Proteobacteria;c__Gammaproteobacteria;o__Burkholderiales;f__A21b;g__;s__
OTU_1200	0	0	0	0	0	0	3.48699e-05	0	0	0	0	0	0	0	0	0	0	0	0	0	0	0	5.23049e-05	0	0.00010461	0	0	0	0	0	1.7435e-05	0	0	0	0	0	k__Bacteria;p__Firmicutes;c__Clostridia;o__Oscillospirales;f__Ruminococcaceae;g__Ruminococcus;s__Ruminococcus_sp_N15.MGS-57
OTU_1201	0	0	0	0	5.23049e-05	0	0	0	0	0	0	0	0	0	0	0	0	0	0	0	0	0	0	0	0	0	0	0	0	0	0	0	0	0	0	0	k__Bacteria
OTU_1202	0	0	0	0	0	0	0	8.71748e-05	0	0	0	0	0	0	0	0	0	0	0	0	0	0	0	0	0	0	0	0	0	0	0	0	0	0	0	0	k__Bacteria;p__Bacteroidota;c__Bacteroidia;o__Bacteroidales;f__Marinifilaceae;g__Odoribacter;s__
OTU_1203	0	0	3.48699e-05	0	0	0	0	0	0	0	0	0	0	0	1.7435e-05	0	1.7435e-05	0	0	0	0	0	0	3.48699e-05	0	0	0	0	0	0	1.7435e-05	5.23049e-05	0	0	1.7435e-05	0	k__Bacteria;p__Proteobacteria;c__Alphaproteobacteria;o__Rhizobiales;f__A0839;g__;s__
OTU_1204	0	0	5.23049e-05	0	0	0	0	0	0	0	0	0	0	0	0	0	0	0	0	0	0	0	0	0	0	0	0	0	0	0	0	0	0	0	0	0	k__Bacteria;p__Actinobacteriota;c__Thermoleophilia;o__Solirubrobacterales;f__67-14;g__;s__
OTU_1205	0	0	0	0	0	0	0	0.000819443	0.000278959	0	0	0	1.7435e-05	0	0	0	0	0	3.48699e-05	0	0	0	0	0	0	0	0	0	0	0	0	0	0	0	0	0	k__Bacteria;p__Bacteroidota;c__Bacteroidia;o__Bacteroidales;f__Muribaculaceae;g__;s__
OTU_1206	0	0	0	0	0	0	0	0	0	0	0	0	0	0	0	0	0	0	0	0	0	0	0	0	0	0	0	0	0	0	0	3.48699e-05	0	0	0	0	k__Bacteria;p__Chloroflexi;c__OLB14;o__;f__;g__;s__
OTU_1207	0	0	6.97399e-05	0	1.7435e-05	0	0	0	0	0	0	0	0	0	6.97399e-05	0	3.48699e-05	0	0	0	0	0	0	3.48699e-05	0	0	5.23049e-05	0	0	6.97399e-05	0	0	0	0	0	0	k__Bacteria;p__Chloroflexi;c__Chloroflexia;o__Thermomicrobiales;f__JG30-KF-CM45;g__;s__
OTU_1208	0	0	0	0	0	0	0	0	0	0	0	0.00010461	0	0	0	0	0	0	0	0	1.7435e-05	0	0	0	0	0	0	0	0	0	0	0	0	0	0	0	k__Bacteria;p__Chloroflexi;c__TK10;o__;f__;g__;s__
OTU_1209	0	3.48699e-05	0	0	0	0	0	0	0	0	0	0	0	0	0	0	0	0	0	0	0	0	0	0	0	0	0	0	0	0	0	0	0	0	0	0	k__Bacteria
OTU_1210	0	0	0	0	0	0	0	0	0	1.7435e-05	0	0	0	0	0	0	0	0	0	0	0	0	0	0	0	0	0	0	0	0	0	0	0	8.71748e-05	0	0	k__Bacteria;p__Chloroflexi;c__Anaerolineae;o__SBR1031;f__A4b;g__;s__
OTU_1211	0	0	0	0	0	0	0	0	0	0	5.23049e-05	1.7435e-05	0	0	0	0	0	0	0	1.7435e-05	0	0	0	0	0	0	0	0	0	0	0	0	0	0	8.71748e-05	0	k__Bacteria;p__Actinobacteriota;c__Actinobacteria;o__Propionibacteriales;f__Nocardioidaceae;g__Nocardioides;s__Nocardioides_sp_JC2947
OTU_1212	0	0	0	0	0	0	0	6.97399e-05	5.23049e-05	0	0	0	0	0	0	0	0	0	0	0	0	0	0	0	0	0	0	0	0	0	0	0	0	0	0	0	k__Bacteria;p__Bacteroidota;c__Bacteroidia;o__Bacteroidales;f__Muribaculaceae;g__;s__
OTU_1213	0	0	0	0	5.23049e-05	0	0	0	0	0	0	0	0	0	0	0	5.23049e-05	0	0	6.97399e-05	0	0	0	1.7435e-05	0	3.48699e-05	0	0	0	3.48699e-05	0	0	0	0	0	0	k__Bacteria
OTU_1214	0	0	0	0	3.48699e-05	0	0	0	0	0	1.7435e-05	0	0	0	5.23049e-05	0	0	0	0	0	0	0	0	0	0	0	0	0	0	0	0	0	0	0	0	1.7435e-05	k__Bacteria;p__Actinobacteriota;c__Actinobacteria;o__Frankiales;f__Acidothermaceae;g__Acidothermus;s__
OTU_1215	0	0	0	0	0	0	0	0	0	0	0	0	0	0	0	0	0	0	0	0	0	0	0	0	0.00013948	0	0	0	0	0	3.48699e-05	0	0	0	0	0	k__Bacteria;p__unidentified_Bacteria;c__Anaerolineae;o__Caldilineales;f__Caldilineaceae
OTU_1216	0	0	0	0	0	0	0	0	0	0	0	0	0	0	0	0	0	0	0	0	0	0	0	0	0	0	1.7435e-05	0	0	0	0	0	0	0	5.23049e-05	0	k__Bacteria;p__unidentified_Bacteria;c__Bacteroidia;o__Cytophagales;f__Microscillaceae;g__;s__
OTU_1217	0	0	0	8.71748e-05	0	0	0	0	0	0	0	0	0	0	0	0	0	0	0	0	0	0	0	0	5.23049e-05	0	0	0	0	0	0	0	0	0	0	0	k__Bacteria;p__Proteobacteria
OTU_1218	0	0	0	0	0	0	0	0	0	0	0	0	0	0	0	0	0	0	0	0	0	0	0	0	0	0	0	0	0	0	6.97399e-05	0	0	0	0	0	k__Bacteria;p__Proteobacteria
OTU_1219	0	0	0	0	0	0	0	0	0	0	0	0	0	0	0	0	0	6.97399e-05	0	0	0	0	0	0	0	0	0	0	0	0	0	0	0	0	0	0	k__Bacteria;p__Actinobacteriota;c__Acidimicrobiia;o__IMCC26256;f__;g__;s__
OTU_1220	0	0	0	0	0	0	0	6.97399e-05	0	0	0	0	0	0	0	0	0	0	0	0	0	0	0	0	0	0	0	0	0	0	0	0	0	0	0	0	k__Bacteria;p__Firmicutes;c__Clostridia;o__Oscillospirales;f__Butyricicoccaceae;g__Butyricicoccus;s__
OTU_1221	0	0	0	0	0	0	0	0	0	0	3.48699e-05	3.48699e-05	0	0	0	0	0	0	0	0	0	0	0	0	0	0	6.97399e-05	0	0	0	0	0	0	0	5.23049e-05	0	k__Bacteria;p__Myxococcota;c__Polyangia;o__Haliangiales;f__Haliangiaceae;g__Haliangium;s__
OTU_1222	0	0	0	0	0	0	0	0.00401004	0.00418439	0	0	0	0	0	0	3.48699e-05	0	0	5.23049e-05	0	0	0.000122045	0	0	0	0	0	0	0	0	0	0	0	0	0	0	k__Bacteria;p__Bacteroidota;c__Bacteroidia;o__Bacteroidales;f__Muribaculaceae;g__;s__
OTU_1223	0	0	0	0	0	0	0	0.00115071	0.00102866	0	0	0	0.000156915	0	0	0	0	0	0	0	0	0	0	0	0	0	0	0	0	0	0	0	0	0	0	0	k__Bacteria;p__Firmicutes;c__Clostridia;o__Lachnospirales;f__Lachnospiraceae;g__Anaerostipes;s__
OTU_1224	0	0	0	3.48699e-05	0	0	0	0	0	0	0	0	0	0	0	0	3.48699e-05	0	0	0	0	0	0	0	0	0	0	0	0	0	0	0	0	0	0	0	k__Bacteria
OTU_1225	0	0	0	0	0	0	0	0	0	0	5.23049e-05	6.97399e-05	0	0	6.97399e-05	0	8.71748e-05	0	0	0	0	0	0	1.7435e-05	0	0	1.7435e-05	0	0	0	0	1.7435e-05	0	0	6.97399e-05	0	k__Bacteria;p__Proteobacteria;c__Alphaproteobacteria;o__Rhizobiales;f__unidentified_Rhizobiales;g__Bauldia;s__
OTU_1226	0	0	1.7435e-05	0	0	0	0	0	0	0	0	0	0	0	0	0	0	0	0	0	0	0	0	0	0	0	0	0	0	1.7435e-05	3.48699e-05	5.23049e-05	0	0.00010461	0	0	k__Bacteria;p__Verrucomicrobiota;c__Verrucomicrobiae;o__Verrucomicrobiales;f__Verrucomicrobiaceae;g__Prosthecobacter;s__
OTU_1227	0	1.7435e-05	0	0	0	0	0	0	0	0	0	0	0	0	0	0	0	0	0	5.23049e-05	1.7435e-05	0	0	5.23049e-05	0	0	0	0	5.23049e-05	0	0	0	0	0	0	0	k__Bacteria;p__Myxococcota;c__Polyangia;o__Haliangiales;f__Haliangiaceae;g__Haliangium;s__
OTU_1228	0	3.48699e-05	0	0	0	0	0	0	0	0	0	0	0.00013948	0	0	0	0	3.48699e-05	0	0	0	0	0	0	0	0	0	0	0	0	0	0	0	0	0	0	k__Bacteria;p__Myxococcota;c__Polyangia;o__Nannocystales;f__Nannocystaceae
OTU_1229	0	0	0	0	0	0	0	0	0	0	0	0	0	0	0	0	0	0	0	0	0	0	0	0	0	0	0	0.000122045	0	0	0	0	0	0	0	0	Unknown
OTU_1230	0	0	0	0	0	0	0	0	5.23049e-05	0	0	0	0	0	0	0	0	0	0	0	0	1.7435e-05	0	0	0	0	0	0	0	0	0	0	0	0	0	0	k__Bacteria;p__Firmicutes;c__Bacilli;o__Erysipelotrichales;f__Erysipelotrichaceae;g__;s__
OTU_1231	0	0	0	0	0	0	0	0	0	0	0	0	6.97399e-05	0	0	0	0	0	0	0	0	0	0	0	0	0	0	0	0	0	0	0	0	0	0	0	k__Bacteria;p__unidentified_Bacteria;c__Alphaproteobacteria;o__Micavibrionales
OTU_1232	0	0	5.23049e-05	0	0	3.48699e-05	0	0	0	0	0	0	0	0	0	0	0.000156915	0.00020922	0	1.7435e-05	0	0	0	0	0	0	3.48699e-05	0	3.48699e-05	0	0	0.00010461	0	0	0	0	k__Bacteria;p__Bacteroidota;c__Bacteroidia;o__Sphingobacteriales;f__Sphingobacteriaceae;g__Pedobacter;s__Pedobacter_ginsengisoli
OTU_1233	0	0	5.23049e-05	0	0	0	0	0	0	0	0	0	0	0	3.48699e-05	0	1.7435e-05	1.7435e-05	0	3.48699e-05	0	0	0	0	0	0	6.97399e-05	0	0	0	0	0	0	0	0	0	k__Bacteria;p__Bacteroidota;c__Bacteroidia;o__Sphingobacteriales;f__Sphingobacteriaceae;g__Mucilaginibacter;s__
OTU_1234	0	0	0	0	0	0	0	0	0.00010461	0	0	0	0	0	0	0	3.48699e-05	0	0	0	0	0	0	0	0	0	0	0	0	0	0	0	0	0	0	0	k__Bacteria;p__unidentified_Bacteria;c__Clostridia;o__Oscillospirales;f__Oscillospiraceae;g__;s__
OTU_1235	0	0	0	0	0	0	0	0	0	0	0	1.7435e-05	0	1.7435e-05	0	0	0	0	0	0	5.23049e-05	0	0	5.23049e-05	0	0	0	0	0	3.48699e-05	0	0	0	0	0	0	k__Bacteria;p__Cyanobacteria;c__Sericytochromatia;o__;f__;g__;s__
OTU_1236	0	0	0	0	3.48699e-05	0	0	0	0	0	0	0	0	0	3.48699e-05	0	0	0	0	6.97399e-05	0	0	0	0	0	1.7435e-05	0	0	0	0	0	1.7435e-05	0	0	0	3.48699e-05	k__Bacteria;p__WPS-2;c__;o__;f__;g__;s__
OTU_1237	0	0	0	0	0	0	0	0	0	0	0	0	8.71748e-05	0	0	0	0	0	0	0	0	0	0	0	0	0	0	0	0	0	0	0	0	0	0	0	k__Bacteria;p__Proteobacteria;c__Gammaproteobacteria;o__Cellvibrionales;f__Microbulbiferaceae;g__Microbulbifer
OTU_1238	0	0	0	0	0	0	0	0	0.00010461	0	0	0	0	0	0	0	0	0	0	0	0	0	0	0	0	0	0	0	0	0	0	0	0	0	0	0	k__Bacteria;p__Firmicutes;c__Clostridia;o__Clostridia_vadinBB60_group;f__;g__;s__
OTU_1239	0	5.23049e-05	5.23049e-05	0	5.23049e-05	1.7435e-05	0	0	0	0	5.23049e-05	6.97399e-05	0	6.97399e-05	5.23049e-05	0	5.23049e-05	0	0	0.000122045	0	0	0	3.48699e-05	0	1.7435e-05	5.23049e-05	0	0	5.23049e-05	0	8.71748e-05	0	0	0	0.00020922	k__Bacteria;p__Acidobacteriota;c__Acidobacteriae;o__Acidobacteriales;f__Acidobacteriaceae_(Subgroup_1);g__Granulicella
OTU_1240	1.7435e-05	8.71748e-05	3.48699e-05	6.97399e-05	0	3.48699e-05	0	0	0	0	5.23049e-05	0	3.48699e-05	0	0	0	0	0	0	1.7435e-05	0	0	0	0	0.00010461	0	0	5.23049e-05	0	0	3.48699e-05	0	0	3.48699e-05	1.7435e-05	0	k__Bacteria;p__Actinobacteriota;c__Acidimicrobiia;o__Microtrichales;f__Ilumatobacteraceae;g__CL500-29_marine_group;s__
OTU_1241	0	0	0	0	0	0	0	0	0	0	0	1.7435e-05	0	0	0	0	0	5.23049e-05	0	0	0	0	0	0	0	0	0	0	0	0	0	8.71748e-05	0	0	0	0	k__Bacteria;p__unidentified_Bacteria;c__Verrucomicrobiae;o__Verrucomicrobiales;f__Verrucomicrobiaceae;g__;s__
OTU_1242	0	0	0	0	0	0	0	8.71748e-05	6.97399e-05	0	0	0	0	0	0	0	0	0	0	0	0	0	0	0	0	0	0	0	0	0	0	0	0	0	0	0	k__Bacteria;p__Bacteroidota;c__Bacteroidia;o__Bacteroidales;f__Rikenellaceae;g__Alistipes;s__
OTU_1243	5.23049e-05	0	0	1.7435e-05	0	0	1.7435e-05	0	0	0	0	0	0	0	0	0	0	0	0	0	0	0	0	0	0	0	0	3.48699e-05	0	0	3.48699e-05	0	0	1.7435e-05	0	0	k__Bacteria;p__Proteobacteria;c__Gammaproteobacteria;o__Aeromonadales;f__;g__;s__
OTU_1244	0	0	0	0	0	0	0	6.97399e-05	0	0	0	0	0	0	0	0	0	0	0	0	0	0	0	0	0	0	0	3.48699e-05	0	0	0	0	0	0	0	0	k__Bacteria
OTU_1245	0	0	0	0	0	0	0	0	6.97399e-05	0	0	0	0	0	0	0	0	0	0	0	0	0	0	0	1.7435e-05	0	0	0	0	0	0	0	0	0	0	0	k__Bacteria
OTU_1246	0	0	1.7435e-05	0	0	0	0	0	0	0	0	3.48699e-05	0	0	0	0	0	0	0	0	0	0	0	0	0	0	0	0	0	0	0	0	0	0	0	3.48699e-05	k__Bacteria;p__WPS-2;c__;o__;f__;g__;s__
OTU_1247	0	0	0	0	0	0	0	5.23049e-05	5.23049e-05	0	0	0	0	0	0	0	0	0	0	0	0	0	0	0	0	0	0	0	0	0	0	0	0	0	0	0	k__Bacteria;p__unidentified_Bacteria;c__Clostridia;o__Lachnospirales;f__Lachnospiraceae;g__;s__
OTU_1248	0	0	0	0	0	0	0	0	0	0	0	1.7435e-05	0	0	0	0	0	0	0	0	0	0	0	0	0	0	0	0	0	0	0	0	0	0	0	0	k__Bacteria;p__Proteobacteria;c__Gammaproteobacteria;o__Burkholderiales;f__B1-7BS;g__;s__
OTU_1249	0	0	0	0	1.7435e-05	0	0	0	0	0	0	0	0	8.71748e-05	0	0	0	0	0	0	0	0	0	0	0	0	0	0	0	0	0	0	5.23049e-05	0	0	0	k__Bacteria;p__unidentified_Bacteria;c__unidentified_Bacteria;o__Gemmatimonadales;f__Gemmatimonadaceae;g__;s__
OTU_1250	0	0	5.23049e-05	0	0	0	0	0	0	0	0	0	0	0	0	0	0	0	0	0	0	0	1.7435e-05	1.7435e-05	0	0	0	0	0	0	0	0	5.23049e-05	0	0	0	k__Bacteria;p__Proteobacteria;c__Alphaproteobacteria;o__Sphingomonadales;f__Sphingomonadaceae
OTU_1251	0	0	0	0	0	0	0	0	0	0	0	0	0	0	0	0	0	6.97399e-05	0	0	1.7435e-05	0	0	0	0	0	0	0	0	0	0	5.23049e-05	0	0	0	0	k__Bacteria;p__Bacteroidota;c__Bacteroidia;o__Sphingobacteriales;f__Sphingobacteriaceae;g__Mucilaginibacter;s__
OTU_1252	0	3.48699e-05	0	0	1.7435e-05	0	0	0	0	0	0	0	0	0.00010461	0	0	0	0	0	0	0	0	0	0	0	3.48699e-05	0	0	0	0	0	0	0	0	0	0	k__Bacteria;p__Bdellovibrionota;c__Bdellovibrionia;o__Bdellovibrionales;f__Bdellovibrionaceae;g__;s__
OTU_1253	0	0	0	0	0	0	0	0	0	0	3.48699e-05	3.48699e-05	0	0	0	0	3.48699e-05	1.7435e-05	0	1.7435e-05	3.48699e-05	0	0	1.7435e-05	0	0	0	0	0	0	0	0	0	0	0	0	k__Bacteria;p__Chloroflexi;c__Dehalococcoidia;o__S085;f__;g__;s__
OTU_1254	1.7435e-05	0	0	0	0	0	0	0	0	0	0	0	0	0	0	0	0	0	0	0.00010461	0	0	0	0	0	0	0	0	0	0	0	0	0	0	0	0	k__Bacteria
OTU_1255	0	0	0	0	0	0	0	0	0	0	0	0	0	0	0	0	8.71748e-05	0	0	0	5.23049e-05	0	0	0	0	0	0	0	3.48699e-05	0	0	3.48699e-05	0	0	0	0	k__Bacteria;p__Proteobacteria;c__Gammaproteobacteria;o__Cellvibrionales;f__Cellvibrionaceae;g__Cellvibrio
OTU_1256	0	0	0	0	6.97399e-05	5.23049e-05	0	0	0	0	0	0	0	0	0	0	0	0	0	0	0	0	0	0	0	0.00010461	3.48699e-05	0	0	0	0	0	0	0	0	0	k__Bacteria;p__Verrucomicrobiota;c__Verrucomicrobiae;o__Chthoniobacterales;f__Chthoniobacteraceae;g__Chthoniobacter;s__
OTU_1257	0	0	0	0	0	0	0	0	0	0	0	0	0	0	0	0	0	0	0	0	0	0	0	0	0	0	0	0	0	0	0	5.23049e-05	0	0	0	0	Unknown
OTU_1258	0	0	0	0	0	0	0	0	0	0	0	0	5.23049e-05	0	0	0	0	0	0	0	0	0	0	0	0	0	0	0	0	0	0	0	0	0	0	0	k__Bacteria;p__Bacteroidota;c__Bacteroidia;o__Cytophagales;f__Microscillaceae;g__Chryseolinea;s__
OTU_1259	3.48699e-05	0	0	3.48699e-05	0	0	1.7435e-05	0	0	1.7435e-05	0	0	0	0	0	0	0	0	0	0	0	0	0	0	8.71748e-05	0	0	0	0	0	0	0	0	0	0	0	k__Bacteria;p__Proteobacteria;c__Gammaproteobacteria;o__Cellvibrionales;f__Spongiibacteraceae;g__;s__
OTU_1260	0	0	0	0	0	0	0	0	0	0	0	0	0	0	0	0	1.7435e-05	1.7435e-05	0	3.48699e-05	0	0	0	0	0	0	0	0	0	0	0	0	0	0	1.7435e-05	0	k__Bacteria;p__Cyanobacteria;c__Vampirivibrionia;o__Obscuribacterales;f__Obscuribacteraceae;g__;s__
OTU_1261	0	0	3.48699e-05	0	8.71748e-05	5.23049e-05	0	0	0	0	3.48699e-05	0	0	0	6.97399e-05	0	5.23049e-05	5.23049e-05	0	0	3.48699e-05	0	1.7435e-05	5.23049e-05	0	3.48699e-05	0	0	0	0	0	0	0	0	5.23049e-05	0	k__Bacteria;p__unidentified_Bacteria;c__Vicinamibacteria;o__Vicinamibacterales;f__;g__;s__
OTU_1262	0	0	0	0	0	0	0	0	0	0	0	0	0	5.23049e-05	0	0	0	0	0	0	0	0	0	0	0	0	0	0	0	0	0	0	8.71748e-05	0	0	0	k__Bacteria;p__unidentified_Bacteria;c__Saccharimonadia;o__Saccharimonadales;f__LWQ8;g__;s__
OTU_1263	0	0	0	0	0	0	0	0	0	0	0	5.23049e-05	0	0	0	0	0	0	0	0	0	0	0	0	0	0	0	0	0	0	0	0	0	0	0	0	k__Bacteria;p__Actinobacteriota;c__Actinobacteria;o__Micromonosporales;f__Micromonosporaceae;g__Dactylosporangium;s__
OTU_1264	0	0	0	0	0	0	0	0	0	0	0	0	0	0	0	0	0	0	0	0	0	0	0	0	0	0	0	0	0	0	0	0	0	5.23049e-05	0	0	k__Bacteria;p__Proteobacteria
OTU_1265	0	0	0	0	0	0	0	0	0	0	0	0	0	0	0	0	0	0	0	0	0	0	0	0	0	0	0	3.48699e-05	0	0	5.23049e-05	0	0	1.7435e-05	0	0	k__Bacteria;p__Bdellovibrionota;c__Bdellovibrionia;o__Bdellovibrionales;f__Bdellovibrionaceae;g__Bdellovibrio
OTU_1266	0	0	0	3.48699e-05	0	0	8.71748e-05	0	0	0	0	0	0	0	0	0	0	0	0	0	0	0	0	0	0	0	0	0	0	0	0	0	0	0	0	0	k__Bacteria;p__Firmicutes;c__Clostridia;o__Oscillospirales;f__Ruminococcaceae
OTU_1267	0	0	0	0	0	0	0	0	0	0	0	0	0	0	0	0	0	0	0	0	0	0	0	0	0	0	0	0	0	0	0	0	0	0	0	3.48699e-05	k__Bacteria
OTU_1268	0	0	0	1.7435e-05	0	0	0	0	0	0	0	0	0	0	0	0	0	0	0	0	0	0	0	0	3.48699e-05	0	0	0	0	0	1.7435e-05	0	0	0	0	0	k__Bacteria;p__Myxococcota;c__Polyangia;o__Polyangiales;f__Phaselicystidaceae;g__Phaselicystis;s__
OTU_1269	0	0	0	0	1.7435e-05	1.7435e-05	0	0	0	0	0	0	0	6.97399e-05	1.7435e-05	0	0	0	0	0	0	0	0	0	0	0	0	0	0	0	0	0	1.7435e-05	0	0	0	k__Bacteria;p__Proteobacteria;c__Alphaproteobacteria;o__Sphingomonadales;f__Sphingomonadaceae;g__Sphingoaurantiacus;s__
OTU_1270	5.23049e-05	0	0	0	0	0	0	0	0	0	0	0	0	0	0	0	0	0	0	0	0	0	0	0	0	0	0	0	0	0	0	0	0	0	0	0	k__Bacteria;p__Bacteroidota;c__Bacteroidia;o__Bacteroidales;f__Prevotellaceae;g__Prevotella;s__Prevotella_sp_DJF_CP65
OTU_1271	0	0	0	0	0	0	0	0	0	0	0	0	0	0	0	0	0	0	0	0	0	0	0	0	0	0	0	0	0	0	0.00010461	0	0	0	0	0	k__Bacteria;p__Myxococcota;c__Polyangia;o__Haliangiales;f__Haliangiaceae;g__Haliangium;s__
OTU_1272	0	0	0	0	0	0	0	3.48699e-05	5.23049e-05	0	0	0	0	0	0	0	0	0	0	0	0	0	0	0	1.7435e-05	0	0	0	0	0	0	0	0	0	0	0	k__Bacteria;p__Firmicutes;c__Bacilli;o__Lactobacillales;f__Aerococcaceae;g__Aerococcus;s__Aerococcus_urinaeequi
OTU_1273	0	0	0	0	0	0	0	0	0.00010461	0	0	0	0	0	0	0	0	0	0	0	0	0	0	0	0	0	0	0	0	0	0	0	0	0	0	0	k__Bacteria;p__unidentified_Bacteria;c__Clostridia;o__Oscillospirales;f__Ruminococcaceae;g__unidentified_Ruminococcaceae;s__[Clostridium]_leptum
OTU_1274	0	0	0	0	0	0	0	0	0	0	3.48699e-05	0	0	0	0	0	0	0	0	0	1.7435e-05	0	0	0	0	0	0	0	0	3.48699e-05	0	0	0	0	1.7435e-05	1.7435e-05	k__Bacteria;p__Gemmatimonadetes;c__unidentified_Gemmatimonadetes;o__Gemmatimonadales;f__Gemmatimonadaceae;g__Gemmatimonas;s__
OTU_1275	0	0	0	0	0	0	0	0	0	0	0	0	6.97399e-05	0	0	0	0	0	0	0	0	0	0	0	0	0	0	0	0	0	0	0	0	0	0	0	k__Bacteria;p__Proteobacteria;c__Gammaproteobacteria;o__211ds20;f__;g__;s__
OTU_1276	0	0	0	0	0	0	0	0	0	0	0	0	0	0	0	0	0	0	0	0	0	0	0	0	0	0	0	0	0	0	5.23049e-05	0	0	0	0	0	k__Bacteria;p__Elusimicrobiota;c__Lineage_IIb;o__;f__;g__;s__
OTU_1277	5.23049e-05	0	0	6.97399e-05	0	0	0	1.7435e-05	0	3.48699e-05	0	0	0	0	0	0	0	0	0	0	0	0	0	0	0	0	0	0	0	0	0	0	0	0	0	0	Unknown
OTU_1278	0	1.7435e-05	0	0	1.7435e-05	1.7435e-05	0	0	0	0	0	3.48699e-05	0	3.48699e-05	0	0	0	0	0	0	0	0	0	0	0	0	0	0	0	0	0	0	0	0	1.7435e-05	0	k__Bacteria;p__Actinobacteriota;c__Actinobacteria;o__Micrococcales;f__Microbacteriaceae;g__Agromyces;s__
OTU_1279	0	0	0	0	0	0	0	0	0	1.7435e-05	0	0	0	0	0	0	0	0	0	0	0	0	0	0	6.97399e-05	0	0	0	0	0	0	0	0	0	0	0	k__Bacteria;p__Cyanobacteria;c__Vampirivibrionia;o__Obscuribacterales;f__Obscuribacteraceae;g__Candidatus_Obscuribacter;s__
OTU_1280	0	0	0	5.23049e-05	0	0	0	0	0	0	0	0	0	0	0	0	0	0	0	0	0	0	0	0	0	0	0	0	0	0	0	0	0	5.23049e-05	0	0	k__Bacteria
OTU_1281	0	0	0	0	0	0	0	0	0	1.7435e-05	0	0	0	0	0	0	0	0	0	0	0	0	0	0	5.23049e-05	0	0	0	0	0	0	0	0	0	0	0	k__Bacteria;p__Proteobacteria;c__Gammaproteobacteria;o__Burkholderiales;f__Rhodocyclaceae;g__Denitratisoma;s__
OTU_1282	0	0	0	1.7435e-05	0	0	0.000122045	0	3.48699e-05	1.7435e-05	0	0	0	0	0	0	0	0	0	0	0	1.7435e-05	0	0	0	0	0	3.48699e-05	0	0	0	0	0	0	0	0	k__Bacteria;p__Firmicutes;c__Clostridia;o__Christensenellales;f__Christensenellaceae;g__Christensenellaceae_R-7_group;s__
OTU_1283	0	8.71748e-05	0	0	0	0	0	0	0	0	0	0	0	0.000226655	3.48699e-05	0	1.7435e-05	0	0	0	0	0	0	0	0	0	0	0	0	0	0	0	0	0	5.23049e-05	0	k__Bacteria;p__Gemmatimonadota;c__S0134_terrestrial_group;o__;f__;g__;s__
OTU_1284	0	0	0	0	0	0	0	8.71748e-05	0	0	0	0	0	0	0	0	0	0	0	3.48699e-05	0	0	0	0	0	0	0	0	0	0	0	0	0	0	0	0	k__Bacteria
OTU_1285	0	0	0	0	0	0	0	6.97399e-05	8.71748e-05	1.7435e-05	0	0	0	0	0	0	0	0	0	0	0	3.48699e-05	0	0	0	0	0	0	0	0	0	0	0	0	0	0	k__Bacteria;p__Firmicutes;c__Bacilli;o__Staphylococcales;f__Staphylococcaceae;g__Jeotgalicoccus
OTU_1286	0	0	0	0	0	0	0	0	0	0	0	0	0.000278959	0	0	0	0	0	0	0	0	0	0	0	0	0	0	0	0	0	0	0	0	0	0	0	k__Bacteria;p__Proteobacteria;c__Gammaproteobacteria;o__Oceanospirillales;f__Halomonadaceae;g__Halomonas;s__Halomonas_ventosae
OTU_1287	0	0	0	0	0	0	0	0	0	0	0	0	0.00010461	0	0	0	0	0	0	0	0	0	0	0	0	0	1.7435e-05	0	0	0	0	0	0	0	0	0	k__Bacteria;p__Proteobacteria;c__Gammaproteobacteria;o__Steroidobacterales;f__Steroidobacteraceae;g__Steroidobacter;s__
OTU_1288	0	0	0	0	0	0	0	0.000278959	0	0	0	0	0	0	0	0	0	0	0	0	0	0	0	0	0	0	0	0	0	0	0	0	0	0	1.7435e-05	0	k__Bacteria;p__Bacteroidota;c__Bacteroidia;o__Bacteroidales;f__Muribaculaceae;g__;s__
OTU_1289	0	3.48699e-05	0	0	0	0	0	0	0	0	3.48699e-05	0	0	5.23049e-05	0	0	0	0	0	0	0	0	0	1.7435e-05	0	1.7435e-05	0	0	0	0	0	0	0	0	0	5.23049e-05	k__Bacteria;p__Proteobacteria;c__Gammaproteobacteria;o__Burkholderiales;f__TRA3-20;g__;s__
OTU_1290	0	0	0	0	0	0	0	0	0	0	0	0	0	0	0	0	0	0	0	0	0	0	0	0	0	0	0	0	0	0	1.7435e-05	0	0	1.7435e-05	0	0	k__Bacteria;p__Proteobacteria;c__Gammaproteobacteria;o__Xanthomonadales;f__Rhodanobacteraceae;g__Dyella
OTU_1291	0	0	0	5.23049e-05	6.97399e-05	1.7435e-05	0	0	0	0	3.48699e-05	1.7435e-05	0	0	0	0	0	0	0	0	0	0	1.7435e-05	0	0	3.48699e-05	3.48699e-05	0	0	0	0	0	0	5.23049e-05	1.7435e-05	3.48699e-05	k__Bacteria;p__Proteobacteria;c__Gammaproteobacteria;o__Enterobacterales;f__Enterobacteriaceae
OTU_1292	0	0	0	0	0	0	0	0	0	0	0	0	0	0	0	0	0	0	0	0	0	0	0	0	0	0	1.7435e-05	0	0	0	0	0	0	0	0	6.97399e-05	k__Bacteria;p__Actinobacteriota;c__Actinobacteria;o__Micrococcales;f__Microbacteriaceae;g__Agromyces
OTU_1293	0	0	0	0	0	0	0	0	0	0	0	0	6.97399e-05	0	0	0	0	0	0	0	0	0	0	0	0	0	0	0	0	0	0	0	0	0	0	0	k__Bacteria;p__unidentified_Bacteria;c__Alphaproteobacteria;o__Micavibrionales;f__Micavibrionaceae;g__;s__
OTU_1294	0	0	0	0	0	0	8.71748e-05	6.97399e-05	0	0	0	0	0	0	0	0	0	0	0	0	0	0	0	0	0	0	0	0	0	0	0	0	0	0	0	0	k__Bacteria
OTU_1295	0	0	0	0	0	0	0	0	0	0	3.48699e-05	0	0	0	0	0	0	0	0	0	0	0	0	0	0	0	0	0	0	0	0	0	0	0	0	0	k__Bacteria;p__Nitrospirota;c__Nitrospira;o__Nitrospirales;f__Nitrospiraceae
OTU_1296	0	0	0	0	0	0	0	0	0.00010461	0	0	0	0	0	0	0	0	0	0	0	0	0	0	0	0	0	0	0	0	0	0	0	0	0	0	0	k__Bacteria;p__Actinobacteriota;c__Coriobacteriia;o__Coriobacteriales;f__Eggerthellaceae
OTU_1297	0	0	0	0	0	0	0	0	0	0	0	0	0	0	0	0	3.48699e-05	0	0	1.7435e-05	0	0	0	0	0	0	0	0	0	0	0	6.97399e-05	0	0	0	0	Unknown
OTU_1298	0	0	0	0	0	0	0	0.000470744	0.000470744	0	0	0	0	0	0	3.48699e-05	0	0	0	0	0	0	0	0	0	0	0	0	0	0	0	0	0	0	0	0	k__Bacteria
OTU_1299	0	0	0	0	0	1.7435e-05	0	0	0	0	0	0	0	0	0	0	0	0	0	0	0	0	0	0	0	0	1.7435e-05	0	0	0	0	0	0	0	5.23049e-05	0	k__Bacteria;p__Firmicutes;c__Bacilli;o__Paenibacillales;f__Paenibacillaceae;g__Paenibacillus;s__Paenibacillus_koleovorans
OTU_1300	0	0	0	0	0	1.7435e-05	0	0	0	0	0	0	0	0	0	0	0	5.23049e-05	0	0	0	0	0	0	0	1.7435e-05	1.7435e-05	0	0	0	0	0	0	0	0	0	k__Bacteria
OTU_1301	0	3.48699e-05	0	0	0	0	0	0	0	0	0	0	0	3.48699e-05	0	0	0	3.48699e-05	0	0	0	0	3.48699e-05	0	0	0	0	0	0	0	0	0	6.97399e-05	0	1.7435e-05	0	k__Bacteria;p__Gemmatimonadetes;c__unidentified_Gemmatimonadetes;o__Gemmatimonadales;f__Gemmatimonadaceae;g__Gemmatimonas;s__Gemmatimonas_phototrophica
OTU_1302	0	0	0	0	0	0	0	0	0	0	1.7435e-05	0	0	0	0	0	0	3.48699e-05	0	0	0	0	6.97399e-05	0	0	0	0	0	0	0	0	0	0	0	0	0	k__Bacteria;p__Cyanobacteria;c__Cyanobacteriia;o__Chloroplast;f__unidentified_Chloroplast;g__unidentified_Chloroplast
OTU_1303	0	0	0	0	0	0	0	0	0	0	0	0	5.23049e-05	0	0	0	0	0	0	0	0	0	0	0	0	0	0	0	0	0	0	0	0	0	0	0	k__Bacteria;p__Proteobacteria;c__Alphaproteobacteria
OTU_1304	0	0	0	0	0	0	0	0	0	0	0	0	0	0	0	0	0	0	0	0	0	0	0	0	0	0	0	0	0	0	0	0	0	0	3.48699e-05	0	k__Bacteria;p__Firmicutes;c__Limnochordia;o__unidentified_Limnochordia;f__unidentified_Limnochordia;g__Hydrogenispora
OTU_1305	0	0	0	0	0	0	6.97399e-05	0	0	1.7435e-05	0	0	0	0	0	0	0	0	0	0	0	0	0	0	0	0	0	0	0	0	0	0	0	0	0	0	k__Bacteria;p__Proteobacteria;c__Alphaproteobacteria;o__Rhodobacterales;f__Rhodobacteraceae;g__Ruegeria;s__Ruegeria_lacuscaerulensis
OTU_1306	0	0	0	0	0	0	0	0	0	0	0	0	0	0	0	0	0	0	0	0	0	0	0.00010461	0	0	0	0	0	0	0	0	0	3.48699e-05	0	0	0	k__Bacteria;p__Acidobacteriota;c__Holophagae;o__Subgroup_7;f__;g__;s__
OTU_1307	0	0	0	0	0	0	0	0.00010461	3.48699e-05	0	3.48699e-05	0	0	0	0	0	0	0	0	0	0	0	0	0	0	0	0	0	0	0	0	0	0	0	0	0	k__Bacteria;p__Firmicutes;c__Clostridia;o__Lachnospirales;f__Lachnospiraceae;g__ASF356;s__
OTU_1308	0	0	0	0	0	0	0	0	0	0	0	0	0	0	0	0	0	0	0	3.48699e-05	0	0	0	1.7435e-05	1.7435e-05	0	0	5.23049e-05	0	0	0	3.48699e-05	0	3.48699e-05	0	0	k__Bacteria;p__Bacteroidota;c__Bacteroidia;o__Chitinophagales;f__Chitinophagaceae;g__Terrimonas;s__
OTU_1309	0	0	0	0	0	0	0	0	0	0	0	0	5.23049e-05	0	0	0	0	0	0	0	0	0	0	0	0	0	0	0	0	0	0	0	0	0	0	0	k__Bacteria
OTU_1310	0	1.7435e-05	6.97399e-05	0	0	3.48699e-05	0	0	0	0	0	0	0	0	6.97399e-05	0	0	0	0	3.48699e-05	0	0	0	0	0	0	1.7435e-05	0	0	0	0	1.7435e-05	5.23049e-05	0	0	0	k__Bacteria;p__Chloroflexi;c__Anaerolineae;o__SBR1031;f__A4b;g__;s__
OTU_1311	0	0	0	0	0	0	0	6.97399e-05	3.48699e-05	0	0	0	0	0	0	0	0	0	0	0	0	0	0	0	0	0	0	0	0	0	0	0	0	0	0	0	k__Bacteria
OTU_1312	0	0	0	0	0	0	0	0	0	0	0	0	0	0	0	0	0	0	0	0	0	0	0	0	0	0	0	0	0	0	0	0.00013948	0	0	0	0	k__Bacteria;p__Bacteroidota;c__Bacteroidia;o__Sphingobacteriales;f__Sphingobacteriaceae;g__Sphingobacterium
OTU_1313	0	0	0	0	0	0	0	0.00010461	0	0	0	0	0	0	0	0	0	0	0	0	0	0	0	0	0	0	0	0	0	0	0	0	0	0	0	0	k__Bacteria;p__Bacteroidota;c__Bacteroidia;o__Bacteroidales;f__Muribaculaceae;g__;s__
OTU_1314	0	0	0	0	0	0	0	0	0	0	0	0	0	0	0	0	0	0.00010461	0	0	0	0	0	0	0	0	0	0	0	0	0	5.23049e-05	0	0	0	0	k__Bacteria
OTU_1315	0	0	0	0	0	0	0	6.97399e-05	3.48699e-05	0	0	0	0	0	0	3.48699e-05	0	0	0	0	0	0	0	0	0	0	0	0	0	0	0	0	0	0	3.48699e-05	0	k__Bacteria;p__Firmicutes;c__Clostridia;o__Oscillospirales;f__Ruminococcaceae;g__Anaerotruncus;s__
OTU_1316	0	0	0	0	0	0	0	0	0	0	0	0	0	0	0	0	0.000122045	0	0	0	0	0	0	0	0	0	0	0	0	0	0	0	0	0	0	0	k__Bacteria
OTU_1317	0	0	1.7435e-05	0	3.48699e-05	1.7435e-05	0	0	0	0	0	0	0	0	0	0	0	0	0	0	0	0	0	1.7435e-05	0	0	0	0	0	0	0	0	3.48699e-05	0	6.97399e-05	1.7435e-05	k__Bacteria;p__Verrucomicrobiota;c__Verrucomicrobiae;o__Verrucomicrobiales;f__Rubritaleaceae;g__Luteolibacter;s__
OTU_1318	0	0	0	0	0	0	0	0	0	0	0	0	0	0	0	0	0	0	0	0	0	0	0	0	0	0	0	6.97399e-05	0	0	0	0	0	0	0	0	Unknown
OTU_1319	0	0	0	0	0	0	0	0	0	0	0	0	0	5.23049e-05	0	0	0	0	0	1.7435e-05	0	0	0	1.7435e-05	0	0	0	0	0	0	0	6.97399e-05	0	0	3.48699e-05	0	k__Bacteria;p__unidentified_Bacteria;c__Alphaproteobacteria;o__Caulobacterales;f__Caulobacteraceae;g__;s__
OTU_1320	0	0	0	0	0	0	0	0	0	0	0	0	0	0	0	0	1.7435e-05	0	0	3.48699e-05	0	0	0	0	0	0	0	0	0	0	0	0	0	0	0	0	k__Bacteria;p__Bacteroidota;c__Bacteroidia;o__Chitinophagales;f__Chitinophagaceae;g__Pseudoflavitalea;s__
OTU_1321	0	0	0	0	0	0	0	0	0	0	0	0	3.48699e-05	0	0	0	0	0	0	0	0	0	0	0	0	0	0	0	0	0	0	0	0	0	0	0	k__Bacteria;p__unidentified_Bacteria;c__unidentified_Bacteria;o__Gemmatimonadales;f__Gemmatimonadaceae;g__;s__
OTU_1322	0	0	0	0	0	0	0	8.71748e-05	0	0	0	0	0	0	0	0	0	0	0	0	0	0	0	0	0	0	0	0	0	0	0	0	0	0	0	0	Unknown
OTU_1323	0	0	0	0	0	3.48699e-05	0	0	0	0	8.71748e-05	0	0	0	0	0	0	5.23049e-05	0	0	3.48699e-05	0	0	0	0	0	0	0	0	1.7435e-05	0	3.48699e-05	0	0	5.23049e-05	0	k__Bacteria;p__Acidobacteriota;c__Holophagae;o__Holophagales;f__Holophagaceae;g__Holophaga;s__Acidobacteria_bacterium_CHC25
OTU_1324	0	0	0	0	0	0	0	0	0	0	0	0	0	0	0	0	0	0	0	0	0	0	0	0	0	0	3.48699e-05	0	0	0	0	0	0	0	0	0	k__Bacteria;p__Myxococcota;c__Polyangia;o__Polyangiales;f__Sandaracinaceae;g__Sandaracinus;s__
OTU_1325	0	3.48699e-05	0	0	0	0	0	0	0	0	0	0	0	6.97399e-05	0	0	0	0	0	0	0	0	0	0	0	0	0	0	0	0	0	0	0	0	0	0	k__Bacteria;p__Myxococcota;c__Polyangia;o__Blfdi19
OTU_1326	5.23049e-05	0	0	0	0	0	0	0	0	0	0	0	0	0	0	0	0	0	0	0	0	0	0	0	0	0	0	0	0	0	0	0	0	0	0	0	k__Bacteria
OTU_1327	0	0	0	0	0	0	0	0	0	0	0	0	0	0	0	0	0	0.000156915	0	0	0	0	0	0	0	0	0	0	0	0	0	0	0	0	0	0	k__Bacteria;p__Actinobacteriota;c__Actinobacteria;o__Streptosporangiales;f__Streptosporangiaceae;g__Nonomuraea;s__
OTU_1328	0	0	0	0	0	0	0	0	0	0	0	0	0	0	0	0	0	6.97399e-05	0	0	0	0	0	0	0	0	0	0	5.23049e-05	0	0	1.7435e-05	0	0	0	0	k__Bacteria;p__unidentified_Bacteria;c__Alphaproteobacteria
OTU_1329	0	0	0	0	0	0	0	0	0	0	0	0	3.48699e-05	0	0	0	0	0	0	0	0	0	0	0	0	0	0	0	0	0	0	0	0	0	0	0	k__Bacteria
OTU_1330	0	0	0	0	0	0	0	0	0	0	0	0	0	0	0	0	0	0	0	0	0	0	0	0	0	0	0	0	0	0	5.23049e-05	0	0	0	0	0	k__Bacteria;p__Bacteroidota;c__Bacteroidia;o__Cytophagales;f__Hymenobacteraceae;g__Hymenobacter
OTU_1331	0	0	0	0	0	3.48699e-05	0	0	0	0	0	0	0	0	0	0	0	0	0	0	0	0	0	0	0	0	0	0	0	0	0	0	0	0	0	0	k__Bacteria;p__unidentified_Bacteria;c__Acidimicrobiia;o__Microtrichales;f__;g__;s__
OTU_1332	0	6.97399e-05	0	0	1.7435e-05	0	0	0	0	0	0	0	0	1.7435e-05	0	0	5.23049e-05	0	0	0.000122045	0	0	0	0	0	0	0	0	1.7435e-05	0	0	0	0	0	0	0	k__Bacteria;p__Bacteroidota;c__Bacteroidia;o__Chitinophagales;f__Chitinophagaceae;g__Edaphobaculum;s__
OTU_1333	0	0	0	0	0	0	0	3.48699e-05	0	0	0	0	0	0	0	0	0	0	0	0	0	0	0	0	0	0	0	0	0	0	0	0	0	0	0	0	k__Bacteria
OTU_1334	0	0	0	0	0	0	0	0	0	0	6.97399e-05	0	0	0	0	0	5.23049e-05	0	0	0	0	0	0	0	0	0	0	0	0	0	0	0	0	0	0.000122045	0	k__Bacteria;p__Bacteroidota;c__Bacteroidia;o__Bacteroidales;f__Muribaculaceae;g__;s__
OTU_1335	0	0	0	0	0	0	0	0	0	0	0	0	3.48699e-05	0	0	0	0	0	0	0	0	0	0	0	0	0	0	0	0	0	0	0	0	0	0	0	k__Bacteria;p__unidentified_Bacteria;c__Acidimicrobiia;o__;f__;g__;s__
OTU_1336	0	6.97399e-05	6.97399e-05	0	5.23049e-05	5.23049e-05	0	0	0	0	1.7435e-05	8.71748e-05	0	1.7435e-05	5.23049e-05	0	0	5.23049e-05	0	0.00013948	0	0	0	5.23049e-05	0	0.00013948	8.71748e-05	0	0	0	0	3.48699e-05	0	0	8.71748e-05	3.48699e-05	k__Bacteria;p__Acidobacteriota;c__Acidobacteriae;o__Acidobacteriales;f__Acidobacteriaceae_(Subgroup_1);g__Occallatibacter;s__
OTU_1337	0	1.7435e-05	0	0	0	0	0	0	0	0	1.7435e-05	5.23049e-05	0	1.7435e-05	1.7435e-05	0	3.48699e-05	0	0	0	1.7435e-05	0	0	0	0	3.48699e-05	0	0	0	3.48699e-05	0	1.7435e-05	0	0	1.7435e-05	0	k__Bacteria;p__Chloroflexi;c__Chloroflexia;o__Thermomicrobiales;f__JG30-KF-CM45;g__;s__
OTU_1338	0	0	0	0	0	0	0	0	0	0	0	0	0	0	0	0	0	0	0	0	0	0	0	0	0	0	0	0	0	0	0	0	1.7435e-05	0	0	0	k__Bacteria;p__unidentified_Bacteria;c__Polyangia;o__Polyangiales;f__Sandaracinaceae;g__;s__
OTU_1339	0	0	0	0	0	0	0	0	0	0	1.7435e-05	3.48699e-05	0	0	0	0	0	1.7435e-05	0	3.48699e-05	0	0	0	0	0	0	0	0	0	0	0	0	0	0	3.48699e-05	0	k__Bacteria;p__unidentified_Bacteria;c__Alphaproteobacteria;o__Elsterales;f__;g__;s__
OTU_1340	0	0	0	0	0	0	0	0	0	3.48699e-05	0	0	0	0	0	0	0	0	0	0	0	0	0	0	0	0	0	0	0	0	0	0	0	0	0	0	k__Bacteria
OTU_1341	0	0	0	0	0	0	0	0	0	0	3.48699e-05	0	0	0	0	0	0	0	0	0	0	0	0	0	0	1.7435e-05	0	0	0	0	0	0	0	0	0	0	k__Bacteria;p__Bdellovibrionota;c__Oligoflexia;o__0319-6G20;f__;g__;s__
OTU_1342	0	0	0	0	0	0	0	0	0	0	1.7435e-05	0	0	0	0	0	0	0	0	0	0	0	0	0	0	0	0	0	0	0	0	0	0	0	1.7435e-05	0	k__Bacteria;p__unidentified_Bacteria;c__Verrucomicrobiae;o__Pedosphaerales;f__Pedosphaeraceae;g__;s__
OTU_1343	0	0	0	0	0	0	0	0	0	0	0	0	0	0	1.7435e-05	0	0	3.48699e-05	0	0	0	0	0	0	0	1.7435e-05	0	0	0	0	0	1.7435e-05	0	0	0	0	k__Bacteria;p__Cyanobacteria;c__Sericytochromatia;o__unidentified_Sericytochromatia;f__unidentified_Sericytochromatia;g__unidentified_Sericytochromatia;s__Hyaloperonospora_arabidopsidis
OTU_1344	0	0	0	0	0	0	0	0	0	0	0	0	0.000122045	0	0	0	0	0	0	0	0	0	0	0	0	0	0	0	0	0	0	0	0	0	0	0	k__Bacteria;p__Proteobacteria;c__Gammaproteobacteria;o__Oceanospirillales;f__Halomonadaceae;g__Halomonas
OTU_1345	0	0	0	0	1.7435e-05	0	0	0	0	0	0	0	0	5.23049e-05	0	0	0	0	0	0	0	0	0	0	0	0	0	0	3.48699e-05	0	0	0	0	0	0	0	k__Bacteria;p__Firmicutes;c__Bacilli;o__Exiguobacterales;f__Exiguobacteraceae;g__Exiguobacterium
OTU_1346	0	0	0	0	0	0	0	5.23049e-05	3.48699e-05	0	0	0	0	0	0	0	0	0	0	0	0	1.7435e-05	0	0	0	0	0	0	0	0	0	0	0	0	0	0	k__Bacteria;p__Actinobacteriota;c__Actinobacteria;o__Corynebacteriales;f__Corynebacteriaceae;g__Corynebacterium;s__Corynebacterium_stationis
OTU_1347	0	0	0	0	0	0	0	0	0	0	0	0	0	0	0	0	5.23049e-05	0	0	0	0	0	0	0	0	0	0	0	0	0	0	0	0	0	0	0	k__Bacteria
OTU_1348	0	0	0	0	0	5.23049e-05	3.48699e-05	0	0	0	0.00013948	0	0	0	0	0	3.48699e-05	0.000122045	0	0	0	0	0	1.7435e-05	0	0	8.71748e-05	0	0	0	0	0.00010461	0	0	0.00020922	3.48699e-05	k__Bacteria;p__Proteobacteria;c__Gammaproteobacteria;o__Burkholderiales;f__TRA3-20
OTU_1349	0	0	0	0	0	0	0	0	0	0	0	6.97399e-05	0	1.7435e-05	0	0	0	0	0	0	0	0	0	0	0	0	0	0	0	0	0	0	0	0	0	0	k__Bacteria;p__Bdellovibrionota;c__Bdellovibrionia;o__Bdellovibrionales;f__Bdellovibrionaceae;g__;s__
OTU_1350	0	0	1.7435e-05	0	0	0	0	0	0	0	0	0	0	0	0	0	0	0	0	1.7435e-05	0	0	0	0	0	0	0	0	0	0	0	0	0	0	0	0	k__Bacteria;p__Firmicutes;c__Bacilli;o__Paenibacillales;f__Paenibacillaceae;g__Paenibacillus
OTU_1351	0	0	0	0	0	0	0	0	0	0	0	1.7435e-05	0	0	0	0	0	0	0	0	0	0	0	0	0	0	0	0	0	0	0	0	0	0	0	0	k__Bacteria
OTU_1352	0	0	0	3.48699e-05	0	0	0.00010461	0	0	0.000679964	0	0	0	0	0	0	0	0	0	0	0	0	0	0	3.48699e-05	0	0	0	0	0	0	0	0	0	0	0	k__Bacteria;p__Proteobacteria;c__Gammaproteobacteria;o__Enterobacterales;f__Enterobacteriaceae;g__Escherichia-Shigella
OTU_1353	0	0	1.7435e-05	0	0	3.48699e-05	0	0	0	0	3.48699e-05	0	0	0	0	0	0	0	0	0	0	0	0	1.7435e-05	0	1.7435e-05	0	0	0	0	0	0	0	0	0	1.7435e-05	k__Bacteria;p__Chloroflexi;c__Dehalococcoidia;o__S085;f__;g__;s__
OTU_1354	0	0	0	0	0	0	0	0	0	0	0	0	5.23049e-05	0	0	0	0	0	0	0	0	0	0	0	0	0	0	0	0	0	0	0	0	0	0	0	k__Bacteria;p__Gemmatimonadota;c__BD2-11_terrestrial_group;o__;f__;g__;s__
OTU_1355	0	0	0	0	0	0	0	0	0	0	0	0	0	0	0	0	0	3.48699e-05	0	0	0	0	0	0	0	0	0	0	0	0	0	0	0	0	0	0	k__Bacteria;p__Cyanobacteria;c__Vampirivibrionia;o__Vampirovibrionales;f__Vampirovibrionaceae;g__Vampirovibrio;s__
OTU_1356	0	0	0	0	0	0	0	0	0	0	0	0	0	0	0	0	0	0	0	0	0	0	0	0	0	0	1.7435e-05	0	0	0	0	0	0	0	1.7435e-05	0	k__Bacteria;p__unidentified_Bacteria;c__Acidimicrobiia;o__Microtrichales;f__Ilumatobacteraceae;g__;s__
OTU_1357	0	0	0	0	0	0	0	0	0	0	0	0	0	0	0	0	6.97399e-05	0	0	0	0	0	0	0	0	0	0	0	0	0	0	0	0	0	0	0	k__Bacteria;p__Proteobacteria;c__Gammaproteobacteria;o__Burkholderiales;f__Nitrosomonadaceae;g__Ellin6067;s__beta_proteobacterium_DC2b-18
OTU_1358	0	0	0	0	0	0	0	0	5.23049e-05	0	0	0	0	0	0	0	0	0	0	0	0	0	0	0	0	0	0	0	0	0	0	0	0	0	0	0	k__Bacteria
OTU_1359	0	0	0	0	0	1.7435e-05	0	0	0	0	0	0	1.7435e-05	0	0	0	0	0	0	0	0	0	0	0	0	0	0	0	0	0	0	0	0	0	0	0	k__Bacteria;p__Acidobacteriota;c__Vicinamibacteria;o__Vicinamibacterales;f__Vicinamibacteraceae;g__;s__
OTU_1360	0	0	0	0	0	0	0	8.71748e-05	3.48699e-05	0	0	0	0	0	0	0	0	0	0	0	0	0	0	0	0	0	0	0	0	0	0	0	0	0	0	0	k__Bacteria;p__Actinobacteriota;c__Coriobacteriia;o__Coriobacteriales;f__Eggerthellaceae
OTU_1361	0	0	0	0	0	0	0	0.00013948	0	0	0	0	0	0	0	0	0	0	0	0	0	0	0	0	0	0	0	0	0	0	0	0	0	0	0	0	k__Bacteria
OTU_1362	0	0	0	0	0	0	0	0.00010461	0	0	0	0	0	0	0	0	0	0	0	0	0	0	0	0	0	0	0	0	0	0	0	0	0	0	0	0	k__Bacteria;p__Firmicutes;c__Clostridia;o__Lachnospirales;f__Lachnospiraceae;g__Acetitomaculum;s__
OTU_1363	0	0	0	6.97399e-05	0	0	0	0	0	0	0	0	0	0	0	0	0	0	0	0	0	0	0	0	0	0	0	0	0	0	0	0	0	0	0	0	k__Bacteria
OTU_1364	0	0	5.23049e-05	0	1.7435e-05	3.48699e-05	0	0	0	0	6.97399e-05	1.7435e-05	0	0	1.7435e-05	0	5.23049e-05	1.7435e-05	0	0	0	0	0	0	0	0	0.000156915	0	0	0	0	0	0	0	0.00010461	5.23049e-05	k__Bacteria;p__Firmicutes;c__Bacilli;o__Bacillales;f__Bacillaceae;g__Bacillus
OTU_1365	0	0	0	0	0	0	0	0	0	0	0	0	3.48699e-05	0	0	0	0	0	0	0	0	0	0	0	0	0	0	0	0	0	0	0	0	0	0	0	k__Bacteria;p__Chloroflexi;c__Chloroflexia;o__Thermomicrobiales;f__JG30-KF-CM45;g__;s__
OTU_1366	0	0	0	0	0	0	0	0	0	0	0	0	0	0	0	0	0	0	0	8.71748e-05	0	0	0	0	0	0	0	0	0	0	0	0	0	0	0	0	k__Bacteria
OTU_1367	0	0	0	0	0	0	0	0	0	0	0	0	0	0	0	0	0	0	0	0	0	0	0	0	0	0	0	0	0	0	0	6.97399e-05	0	0	0	0	Unknown
OTU_1368	0	0	3.48699e-05	0	3.48699e-05	0	0	0	0	0	0	0	0	0	0	0	0	0	0	0	0	0	0	0	0	0	0	0	0	0	0	0	0	0	0	0	k__Bacteria;p__Actinobacteriota;c__Actinobacteria
OTU_1369	0	0	0	3.48699e-05	0	0	0	0	0	0	0	0	0	0	0	0	0	0	0	0	0	0	0	0	0	0	0	0	0	0	0	0	0	0	0	0	k__Bacteria;p__Proteobacteria;c__Gammaproteobacteria
OTU_1370	0	0	0	0	0	0	0	0	0	0	0	0	0	0	0	0	0	0	0	0	0	0	0	0	0	0	0	0	0	0	0	6.97399e-05	0	0	0	0	k__Bacteria;p__Proteobacteria;c__Gammaproteobacteria;o__Burkholderiales
OTU_1371	0	0	3.48699e-05	0	0	0	0	0	0	0	0	0	0	0	0	0	0	0	0	0	0	0	0	0	0	0	0	0	0	0	0	0	0	0	0	0	k__Bacteria;p__Proteobacteria;c__Gammaproteobacteria;o__Burkholderiales
OTU_1372	0	0	0	0	3.48699e-05	6.97399e-05	0	0	0	0	0	0	0	0	0	0	0	1.7435e-05	0	0	0	0	0	0	0	3.48699e-05	6.97399e-05	0	0	0	0	0	0	0	0	0	k__Bacteria;p__unidentified_Bacteria;c__Alphaproteobacteria;o__Elsterales;f__;g__;s__
OTU_1373	0	0	0	1.7435e-05	0	0	5.23049e-05	0	0	3.48699e-05	0	0	0	0	0	0	0	0	0	0	0	0	0	0	1.7435e-05	0	0	8.71748e-05	0	0	1.7435e-05	0	0	6.97399e-05	0	0	k__Bacteria;p__Proteobacteria;c__Gammaproteobacteria;o__Aeromonadales
OTU_1374	0	0	0	0	0	0	0	0.000575354	0	0	0	0	0	0	0	0	0	0	0	0	0	0	0	0	0	0	0	0	0	0	0	0	0	0	0	0	k__Bacteria;p__Firmicutes;c__Clostridia;o__Lachnospirales;f__Lachnospiraceae;g__Lachnospiraceae_NK4A136_group
OTU_1375	0	0	0	0	0	0	0	5.23049e-05	1.7435e-05	0	0	0	0	0	0	0	0	0	0	0	0	0	0	0	0	0	0	0	0	0	0	0	0	0	0	0	k__Bacteria;p__Firmicutes;c__Clostridia;o__Lachnospirales;f__Lachnospiraceae
OTU_1376	0	0	0	0	0	0	0	0	0	0	0	0	0	0	0	0	0	0	0	0	0	0	0	0	0	0	0	0	0	0	0	0	0	0	3.48699e-05	0	k__Bacteria;p__Firmicutes;c__Clostridia;o__Oscillospirales;f__UCG-010;g__;s__
OTU_1377	0	0	0	0	0	0	0	0	0	0	3.48699e-05	0	0	0	0	0	0	0	0	0	0	0	0	0	0	0	0	0	0	0	0	0	0	0	0	0	k__Bacteria;p__Proteobacteria;c__Gammaproteobacteria
OTU_1378	0	0	0	0	0	0	0	0	0	0	0	0	0	0	0	0	0	0	0	0	0	0	0	1.7435e-05	0	0	0	0	0	0	0	3.48699e-05	0	0	0	0	k__Bacteria;p__Proteobacteria;c__Gammaproteobacteria;o__Burkholderiales;f__Burkholderiaceae;g__Burkholderia-Caballeronia-Paraburkholderia;s__Caballeronia_zhejiangensis
OTU_1379	0	0	0	0	0	0	0	0	0	0	0	0	0	0	3.48699e-05	0	0	3.48699e-05	0	0	0	0	3.48699e-05	0	0	0	0	0	0	0	0	0	0	0	0	0	k__Bacteria;p__Actinobacteriota;c__Thermoleophilia;o__Solirubrobacterales;f__Solirubrobacteraceae;g__Solirubrobacter
OTU_1380	0	0	0	0	0	0	0	0	0	0	0	0	0	1.7435e-05	1.7435e-05	0	1.7435e-05	0	0	0	1.7435e-05	0	0	0	0	0	1.7435e-05	0	0	0	0	0	0	0	0	0	k__Bacteria;p__Actinobacteriota;c__Actinobacteria;o__Propionibacteriales;f__Nocardioidaceae;g__Nocardioides
OTU_1381	0	1.7435e-05	0	0	0	0	0	0	0	0	0	0	0	0	0	0	0	0	0	0	0	0	0	0	0	0	0	0	0	0	0	0	0	0	0	0	k__Bacteria;p__Actinobacteriota;c__Actinobacteria;o__Frankiales;f__Acidothermaceae;g__Acidothermus;s__
OTU_1382	0	0	0	0	0	0	0	0	0	0	3.48699e-05	0	0	0	0	0	0	0	0	0	0	0	0	0	0	0	0	0	0	0	0	0	0	0	0	0	k__Bacteria;p__Bacteroidota;c__Bacteroidia;o__Sphingobacteriales;f__Sphingobacteriaceae;g__Mucilaginibacter;s__Mucilaginibacter_sp_BJC16-A31
OTU_1383	0	0	0	0	0	0	0	0	0	0	0	0	0	0	0	0	0	3.48699e-05	0	3.48699e-05	3.48699e-05	0	0	0	0	0	0	0	0	0	0	0	0	0	8.71748e-05	3.48699e-05	k__Bacteria;p__Proteobacteria;c__Alphaproteobacteria;o__Dongiales;f__Dongiaceae;g__Dongia
OTU_1384	0	0	0	0	0	0	0	0	0	6.97399e-05	0	0	0	0	0	0	0	0	0	0	0	0	0	0	0	0	0	5.23049e-05	0	0	0	0	0	0	0	0	Unknown
OTU_1385	0	0	0	0	0	0	0	0	0	0	1.7435e-05	0	0	0	0	0	0	0	0	0	0	0	0	0	0	0	0	0	0	0	0	0	0	0	3.48699e-05	0	k__Bacteria;p__Bacteroidota;c__Bacteroidia;o__Bacteroidales;f__Muribaculaceae;g__;s__
OTU_1386	0	0	3.48699e-05	0	5.23049e-05	0	0	0	0	0	0	0	0	0	0	0	0	0	0	0	0	0	0	0	0	0	0	0	0	0	0	0	0	0	1.7435e-05	0	k__Bacteria;p__unidentified_Bacteria;c__Acidimicrobiia;o__;f__;g__;s__
OTU_1387	1.7435e-05	0	0	3.48699e-05	0	0	0	0	0	0	0	0	0	0	0	0	0	0	0	0	0	0	0	0	0	0	0	0	0	0	1.7435e-05	0	0	0	0	0	k__Bacteria;p__Proteobacteria;c__Gammaproteobacteria;o__Burkholderiales;f__Oxalobacteraceae;g__Duganella
OTU_1388	0	0	0	0	0	0	0	0	0	0	0	0	0	0	0	0	0	0	0	0	0	0	0	0	0	0	0	0	0	0	0	0	0	3.48699e-05	0	0	k__Bacteria
OTU_1389	0	0	0	0	0	0	0	0	0	0	0	0	0	0	0	0	0	0	0	0	0	0	0	0	0	0	0	0	0	0	0	0	5.23049e-05	0	0	0	k__Bacteria;p__Chloroflexi;c__OLB14;o__;f__;g__;s__
OTU_1390	0	0	3.48699e-05	0	0	0	3.48699e-05	0	0	0	0	3.48699e-05	5.23049e-05	0	0.000156915	0	3.48699e-05	5.23049e-05	0	0	3.48699e-05	0	0	6.97399e-05	1.7435e-05	0	0	0	0	8.71748e-05	0	3.48699e-05	0	0	0	6.97399e-05	k__Bacteria;p__Proteobacteria;c__Alphaproteobacteria;o__Rhizobiales;f__Rhizobiaceae
OTU_1391	0	0	0	0	0	0	0	0	0	0	0	0	0	0	0	0	0	0	0	0	0	0	0	5.23049e-05	0	0	0	0	0	0	0	0	0	0	0	0	k__Bacteria;p__Chloroflexi;c__TK10;o__;f__;g__;s__
OTU_1392	0	0	0	0	0	3.48699e-05	0	0	0	0	1.7435e-05	0	0	0	0	0	1.7435e-05	0	0	6.97399e-05	0	0	5.23049e-05	0	0	0	3.48699e-05	0	0	0	0	5.23049e-05	3.48699e-05	0	0	0	k__Bacteria;p__unidentified_Bacteria;c__Vicinamibacteria;o__Vicinamibacterales;f__;g__;s__
OTU_1393	0	0	0	0	0	0	0	0	0	0	0	0	0	0	0	0	0	0	0	0	0	0	0	0	0	0	0	0	0	0	0	1.7435e-05	0	0	0	0	k__Bacteria;p__Verrucomicrobiota;c__Verrucomicrobiae;o__Chthoniobacterales;f__Terrimicrobiaceae;g__Terrimicrobium;s__
OTU_1394	0	0	0	0	0	0	0	0	0	0	0	0	0	0	0	0	0	0	0	0	0	0	0	0	0	0	0	0	0	0	0	6.97399e-05	0	0	0	0	k__Bacteria
OTU_1395	0	0	0	0	0	0	0	0	0	0	0	0	0	0	0	0	0	0	0	0	0	0	0	0	6.97399e-05	0	0	0	0	0	0	0	0	0	0	0	k__Bacteria;p__Acidobacteriota;c__Holophagae;o__Holophagales;f__Holophagaceae;g__Geothrix;s__
OTU_1396	0	0	0	3.48699e-05	0	0	0	0	0	0	0	0	0	0	0	0	0	0	0	0	0	0	0	0	0	0	0	0	0	0	0	0	0	0	0	0	Unknown
OTU_1397	0	0	0	0	0	0	0	0	0	0	0	0	0	0	0	0	0	0	0	0	0	0	0	0	5.23049e-05	0	0	0	0	0	0	0	0	0	0	0	k__Bacteria
OTU_1398	0	0	0	0	0	0	0.000122045	0	0	0	0	0	0	0	0	0	0	0	0	0	0	0	0	0	0	0	0	0	0	0	0	0	0	0	0	0	k__Bacteria
OTU_1399	0	3.48699e-05	0	0	0	0	0	0	0	0	0	0	0	0	0	0	0	5.23049e-05	0	0	0	0	0	0	0	0	0	0	0	0	0	0	0	0	0	0	k__Bacteria;p__unidentified_Bacteria;c__Vicinamibacteria;o__Vicinamibacterales;f__;g__;s__
OTU_1400	0	1.7435e-05	0	0	0	1.7435e-05	0	0	0	0	0	0	0.00024409	0	0	0	0	1.7435e-05	0	0	0	0	0	3.48699e-05	0	0	1.7435e-05	0	0	0	0	0	0	0	5.23049e-05	0	k__Bacteria
OTU_1401	0	0	0	0	0	0	0	0	3.48699e-05	0	0	0	0	0	0	0	0	0	0	0	0	0	0	0	0	0	0	0	0	0	0	0	0	0	0	0	k__Bacteria
OTU_1402	0	0	0	0	0	0	0	0	0	0	0	5.23049e-05	0	0	3.48699e-05	0	1.7435e-05	8.71748e-05	0	0	0	0	0	0	0	0	0	0	0	0	0	0	0	0	0	1.7435e-05	k__Bacteria;p__Proteobacteria;c__Gammaproteobacteria;o__R7C24;f__;g__;s__
OTU_1403	0	0	0	0	0	0	0	0	0	0	0	0	0	0	3.48699e-05	0	0	0	0	0	0	0	0	0	0	0	0	0	0	0	0	0	0	0	0	0	k__Bacteria;p__Proteobacteria;c__Alphaproteobacteria;o__Rhizobiales;f__Rhizobiaceae
OTU_1404	0	0	0	0	0	0	0	0	0	0	0	0	0	0	0	0	0	0	0	0	0	0	0	0	0	0	1.7435e-05	0	0	0	0	0	0	0	0	5.23049e-05	k__Bacteria;p__unidentified_Bacteria;c__Alphaproteobacteria;o__Rhodospirillales;f__Magnetospirillaceae;g__;s__
OTU_1405	0	0	0	3.48699e-05	0	0	0	0	0	0	0	0	0	0	0	0	0	8.71748e-05	0	0	0	0	0	0	3.48699e-05	0	0	6.97399e-05	0	0	0	0	0	0	0	0	k__Bacteria;p__Proteobacteria;c__Gammaproteobacteria;o__Xanthomonadales;f__Rhodanobacteraceae;g__Ahniella;s__
OTU_1406	0	0	0	0	0	0	1.7435e-05	0	0	0	0	0	0	0	0	0	0	0	0	0	0	0	0	0	0	0	0	0	0	0	0	0	0	0	0	0	k__Bacteria;p__Proteobacteria;c__Gammaproteobacteria
OTU_1407	0	0	0	0	0	0	0	0.000226655	3.48699e-05	0	0	0	0	0	0	0	0	0	0	0	0	0	0	0	0	0	0	0	0	0	0	0	0	0	0	0	k__Bacteria;p__Bacteroidota;c__Bacteroidia;o__Bacteroidales;f__Muribaculaceae;g__;s__
OTU_1408	8.71748e-05	0	0	0	0	0	0	0	0	0	0	0	0	0	0	0	0	0	0	0	0	0	0	0	0	0	0	0	0	0	0	0	0	0	0	0	k__Bacteria;p__Proteobacteria
OTU_1409	0	0	0	0	0	0	0	0	0	0	0	0	0	0	0	0	0	0.000122045	0	0	0	0	0	0	0	0	0	0	0	0	0	1.7435e-05	0	0	0	0	k__Bacteria;p__Bacteroidota;c__Bacteroidia;o__Flavobacteriales;f__Flavobacteriaceae;g__Flavobacterium
OTU_1410	0	0	0	0	0	0	0	0	0	0	5.23049e-05	0	0	0	0	0	0	0	0	0	0	0	0	0	0	0	0	0	0	0	0	0	0	0	0.000348699	0	k__Bacteria;p__Bacteroidota;c__Bacteroidia;o__Bacteroidales;f__Bacteroidaceae;g__Bacteroides;s__
OTU_1411	0	0	6.97399e-05	0	0	0	0	0	0	0	0	0	0	0	0	5.23049e-05	0	0	0	0	0	0	0	0	0	0	0	0	0	0	0	0	0	0	0	0	k__Bacteria;p__unidentified_Bacteria;c__Thermoleophilia;o__Gaiellales;f__;g__;s__
OTU_1412	0	0	0	0	0	0	0	0	0	0	0	3.48699e-05	0	0	0	0	0	0	0	0	0	0	0	0	0	0	0	0	0	0	0	0	0	0	0	0	k__Bacteria;p__Chloroflexi;c__KD4-96;o__;f__;g__;s__
OTU_1413	0	0	0	0	0	0	0	0.000156915	0.00010461	0	5.23049e-05	0	0	0	0	0	0	0	0	5.23049e-05	0	0	0	0	0	0	0	0	0	0	0	0	0	0	3.48699e-05	0	k__Bacteria;p__unidentified_Bacteria;c__Clostridia;o__Oscillospirales;f__Oscillospiraceae;g__;s__
OTU_1414	0	0	0	0	0	0	3.48699e-05	0	0	0	0	0	0	0	0	0	0	0	0	0	0	0	0	0	0	0	0	0	0	0	0	0	0	0	0	0	k__Bacteria
OTU_1415	0	0	0	0	0	0	0	3.48699e-05	0	0	0	0	0	0	0	0	0	0	0	0	0	0	0	0	0	0	0	0	0	0	0	0	0	0	0	0	k__Bacteria;p__unidentified_Bacteria;c__Clostridia;o__Oscillospirales;f__Ruminococcaceae;g__;s__
OTU_1416	0	0	0	0	0	0	0	0	0	0	0	0	0	0	0	0	0	0	0	0	0	0	0	0	0	0	0	1.7435e-05	0	0	0	0	0	0	0	0	k__Bacteria;p__unidentified_Bacteria;c__Bacteroidia;o__Chitinophagales;f__Chitinophagaceae;g__;s__
OTU_1417	0	0	0	0	0	0	0	0	0	0	0	0	0	0	0	0	0	0	0	0	0	0	0	0	0	0	0	0	0	0	0	0	0	0	5.23049e-05	0	k__Bacteria;p__Bacteroidota;c__Bacteroidia;o__Sphingobacteriales;f__Sphingobacteriaceae;g__Mucilaginibacter;s__
OTU_1418	0	0	0	0	0	0	0	0.000191785	0.00024409	0	0	0	0	0	0	0	6.97399e-05	0	0	0	0	0	0	0	0	0	0	0	0	0	0	0	0	0	0	0	k__Bacteria;p__Firmicutes;c__Clostridia;o__Clostridia_UCG-014;f__;g__;s__
OTU_1419	0	0	0	0	0	0	0	0	0	0	0	0	0	0	0	0	3.48699e-05	0	0	3.48699e-05	0	0	0	0	0	0	0	0	0	0	0	1.7435e-05	0	0	0	0	k__Bacteria;p__Bacteroidota;c__Bacteroidia;o__Sphingobacteriales;f__NS11-12_marine_group;g__;s__
OTU_1420	0	0	0	0	0	0	0	0	0	0	0	0	0	0	0	0	0	0	0	0	0	0	0	0	0	0	0	0	0	0	0	0	0	0	3.48699e-05	0	k__Bacteria;p__Myxococcota;c__Polyangia;o__Polyangiales;f__Sandaracinaceae;g__Sandaracinus;s__
OTU_1421	0	0	0	0	0	0	0	0.00010461	0.00017435	0	1.7435e-05	0	0	0	0	0	0	0	0	0	0	0	0	0	0	0	0	0	0	0	0	0	0	0	0	0	k__Bacteria;p__Bacteroidota;c__Bacteroidia;o__Bacteroidales;f__Muribaculaceae;g__;s__
OTU_1422	0	0	0	0	0	0	0	0	0	0	0	0	0	0	0	0	3.48699e-05	0	0	0	0	0	0	0	0	0	0	0	0	0	0	0	0	0	0	0	k__Bacteria;p__Bacteroidota;c__Bacteroidia;o__Chitinophagales;f__Chitinophagaceae;g__Chitinophaga
OTU_1423	0	0	0	0	0	0	3.48699e-05	0	0	0	0	0	0	0	0	0	0	0	0	0	0	0	0	0	0	0	0	0	0	0	0	0	0	0	0	0	k__Bacteria
OTU_1424	0	0	0	0	0	0	1.7435e-05	0	0	0	0	0	0	0	0	0	0	0	0	0	0	0	0	0	3.48699e-05	0	0	0	0	0	0	0	0	0	0	0	k__Bacteria;p__Myxococcota;c__Polyangia;o__mle1-27;f__unidentified_mle1-27;g__unidentified_mle1-27;s__Myxococcales_bacterium_Gsoil_473
OTU_1425	0	0	0	0	0	0	0	0	0	0	0	0	3.48699e-05	0	0	0	0	0	0	0	0	0	0	0	0	0	0	0	0	0	0	0	0	0	0	0	k__Bacteria;p__unidentified_Bacteria;c__Alphaproteobacteria
OTU_1426	0	0	0	0	0	0	0	0	0	0	0	0	8.71748e-05	0	0	0	0	0	0	0	0	0	0	0	0	0	0	0	0	0	0	0	0	0	0	0	k__Bacteria;p__Proteobacteria;c__Gammaproteobacteria;o__211ds20;f__;g__;s__
OTU_1427	0	0	0	0	0	0	0	0	0	0	0	0	5.23049e-05	0	0	0	0	0	0	0	0	0	0	0	0	0	0	0	0	0	0	0	0	0	0	0	k__Bacteria
OTU_1428	0	0	0	0	0	0	0	0	0	0	0	0	0.000191785	0	0	0	0	0	0	0	0	0	0	0	0	0	0	0	0	0	0	0	0	0	0	0	k__Bacteria;p__Proteobacteria;c__Gammaproteobacteria;o__Oceanospirillales;f__Halomonadaceae;g__Halomonas
OTU_1429	0	0	0	0	0	0	0	0	0	0	0	0	0	0	0	0	0	0	0	0	0	0	3.48699e-05	0	0	0	0	0	0	0	0	0	0	0	0	0	k__Bacteria;p__Acidobacteriota;c__Blastocatellia;o__Blastocatellales;f__Blastocatellaceae;g__Stenotrophobacter;s__Acidobacteria_bacterium_IGE-018
OTU_1430	0	0	0	0	0	0	0	0	0	0	0	0	0	0	0	0	0	3.48699e-05	0	0	0	0	0	0	0	0	0	0	0	0	0	0	0	0	3.48699e-05	0	k__Bacteria;p__Proteobacteria;c__Gammaproteobacteria;o__PLTA13;f__;g__;s__
OTU_1431	0	0	0	0	0	0	0	5.23049e-05	3.48699e-05	0	0	0	0	0	0	0	0	0	0	0	0	0	0	0	0	0	0	0	0	0	0	0	0	0	0	0	k__Bacteria;p__Firmicutes;c__Clostridia;o__Lachnospirales;f__Lachnospiraceae;g__Lachnospiraceae_NK4A136_group;s__
OTU_1432	0	0	0	0	0	3.48699e-05	0	0	0	0	0	0	0	0	0	0	0	5.23049e-05	0	0	0	0	0	0	0	0	0	0	0	0	0	0	0	0	0	0	k__Bacteria;p__Bacteroidota;c__Bacteroidia;o__Cytophagales;f__Microscillaceae;g__Chryseolinea;s__
OTU_1433	0	0	0	0	0	0	8.71748e-05	0	0	5.23049e-05	0	0	0	0	0	0	0	0	0	0	0	0	0	0	0	0	0	0	0	0	0	0	0	6.97399e-05	0	0	k__Bacteria;p__Proteobacteria;c__Alphaproteobacteria;o__Rhizobiales;f__Xanthobacteraceae;g__Rhodopseudomonas
OTU_1434	0	0	0	0	0	0	0	0.00013948	0	0	0	0	0	0	0	0	0	0	0	0	0	0	0	0	0	0	0	0	0	0	0	0	0	0	0	0	k__Bacteria;p__Bacteroidota;c__Bacteroidia;o__Bacteroidales;f__Muribaculaceae;g__;s__
OTU_1435	0	0	0	0	0	0	0	0.000122045	0.000191785	0	0	0	0	0	0	0	0	0	0	0	0	1.7435e-05	0	0	0	0	0	0	0	0	0	0	0	0	0	0	k__Bacteria;p__Firmicutes;c__Clostridia;o__Lachnospirales;f__Lachnospiraceae;g__Roseburia
OTU_1436	0	0	0	0	0	1.7435e-05	0	0	0	0	0	0	0	0	0	0	0	0	0	0	0	0	0	0	0	0	5.23049e-05	0	0	0	0	0	0	0	0	0	k__Bacteria;p__unidentified_Bacteria;c__Saccharimonadia;o__Saccharimonadales
OTU_1437	0	0	0	0	0	0	0	0	0	0	0	0	0	0	0	0	0	5.23049e-05	0	0	0	0	0	0	0	0	0	0	0	0	0	0	0	0	0	0	k__Bacteria;p__Firmicutes;c__Clostridia;o__Clostridiales;f__Clostridiaceae;g__Clostridium_sensu_stricto_12;s__Clostridium_magnum
OTU_1438	0	0	0	0	0	0	0	1.7435e-05	0	0	3.48699e-05	0	0	0	0	0	0	0	0	0	0	0	0	0	0	0	0	0	0	0	0	0	0	0	0	0	k__Bacteria;p__Bacteroidota;c__Bacteroidia;o__Bacteroidales;f__Tannerellaceae;g__Parabacteroides;s__Parabacteroides_goldsteinii
OTU_1439	0	0	0	0	0	0	0	0	0	0	0	0	0	1.7435e-05	0	0	0	5.23049e-05	0	0	0	0	0	0	0	0	0	0	0	0	0	0	0	0	0	0	k__Bacteria;p__Proteobacteria;c__Alphaproteobacteria;o__Rhodobacterales;f__Rhodobacteraceae;g__Rubellimicrobium;s__
OTU_1440	0	0	0	0	0	0	0	0	0	0	5.23049e-05	0	0	0	1.7435e-05	0	0	0	0	0	0	0	0	0	0	0	0	0	0	0	0	0	1.7435e-05	0	0.00013948	0	k__Bacteria;p__Acidobacteriota;c__Thermoanaerobaculia;o__Thermoanaerobaculales;f__Thermoanaerobaculaceae;g__Subgroup_10
OTU_1441	5.23049e-05	0	0	6.97399e-05	0	0	0.000383569	0	0	0.000191785	0	0	0	0	0	0	0	0	0	0	0	0	0	0	0.000226655	0	0	0	0	0	6.97399e-05	0	0	5.23049e-05	0	0	k__Bacteria;p__Firmicutes;c__Clostridia;o__Lachnospirales;f__Lachnospiraceae;g__Dorea
OTU_1442	0	0	0	0	1.7435e-05	0.00010461	0	0	0	0	0	0.00010461	0	0	0	0	0	0	0	0	0	0	0	0	0	1.7435e-05	1.7435e-05	0	0	0	0	1.7435e-05	0	0	0	0	k__Bacteria;p__Proteobacteria;c__Alphaproteobacteria;o__Reyranellales;f__Reyranellaceae;g__Reyranella;s__
OTU_1443	0	0	1.7435e-05	0	0	0	0	0	0	0	0	0	0	0	5.23049e-05	0	0	0	0	0	0	0	0	0	0	0	0	0	0	0	0	0	0	0	0	0	k__Bacteria;p__Proteobacteria;c__Alphaproteobacteria;o__Rickettsiales;f__SM2D12;g__;s__
OTU_1444	0	0	0	0	0	0	0	0	0	0	0	0	0	0	0	0	0	5.23049e-05	0	0	0	0	0	0	0	0	0	0	0	0	0	0	0	0	0	0	k__Bacteria;p__Actinobacteriota;c__Actinobacteria;o__Micrococcales;f__Brevibacteriaceae;g__Brevibacterium;s__Brevibacterium_aurantiacum
OTU_1445	0	0	1.7435e-05	0	0	0	0	0	0	0	0	0	0	0	0	0	0	0	0	0	0	0	0	0	0	0	3.48699e-05	0	0	0	5.23049e-05	0	0	0	0	0	k__Bacteria;p__Firmicutes;c__Bacilli;o__Paenibacillales;f__Paenibacillaceae;g__Paenibacillus;s__Paenibacillus_xylanexedens
OTU_1446	0	0	0	0	0	0	0	6.97399e-05	0	0	0	0	0	0	0	0	0	0	0	0	0	0	0	0	0	0	0	0	0	0	0	0	0	0	0	0	k__Bacteria
OTU_1447	0	0	0	0	0	0	0	1.7435e-05	3.48699e-05	0	0	0	0	0	0	0	0	0	0	0	0	0	0	0	0	0	0	0	0	0	0	0	0	0	0	0	k__Bacteria;p__Proteobacteria;c__Gammaproteobacteria;o__Pseudomonadales;f__Moraxellaceae;g__Psychrobacter;s__Psychrobacter_faecalis
OTU_1448	0	0	0	0	0	3.48699e-05	0	0	0	0	0	0	0	0	0	0	5.23049e-05	0	0	0	0	0	0	0	0	0	0	0	0	0	0	1.7435e-05	0	0	0	0	k__Bacteria;p__Acidobacteriota;c__Vicinamibacteria;o__Vicinamibacterales;f__Vicinamibacteraceae;g__;s__
OTU_1449	0	0	0	0	0	0	0	0	0	0	0	0	0	0	0	0	0	0	0	0	0	0	0	0	0	0	0	0	0	0	3.48699e-05	0	0	0	0	0	k__Bacteria;p__unidentified_Bacteria;c__Chloroflexia;o__Chloroflexales;f__Roseiflexaceae;g__;s__
OTU_1450	0	3.48699e-05	0	0	0	0	0	0	0	0	0	0	0	0	0	0	0	0	0	0	0	0	6.97399e-05	0	0	0	0	0	0	0	0	0	6.97399e-05	0	0	0	k__Bacteria;p__unidentified_Bacteria;c__Myxococcia;o__Myxococcales;f__Myxococcaceae;g__;s__
OTU_1451	0	0	1.7435e-05	0	0	0	0	0	0	0	0	0	0	0	0	0	0	0	0	0	0	0	5.23049e-05	0	0	0	0	0	0	0	0	0	1.7435e-05	0	0	0	k__Bacteria;p__Acidobacteriota;c__Thermoanaerobaculia;o__Thermoanaerobaculales;f__Thermoanaerobaculaceae;g__Subgroup_10
OTU_1452	0	0	0	0	0	0	0	0	0	0	0	0	0	0	0	0	0	0	0	0	0	0	0	0	0	0	0	0	0	0	0	5.23049e-05	0	0	0	0	k__Bacteria;p__unidentified_Bacteria;c__Gammaproteobacteria;o__Burkholderiales;f__Neisseriaceae;g__;s__
OTU_1453	0	0	0	0	1.7435e-05	0	0	0	0	0	0	0	0	0	0	0	0	0	0	0	0	0	0	0	0	6.97399e-05	0	0	0	0	0	1.7435e-05	0	0	0	1.7435e-05	k__Bacteria;p__Chloroflexi;c__AD3;o__;f__;g__;s__
OTU_1454	0	0	0	0	0	0	0	0	0	0	0	0	0	0	0	0	0	0	0	0	3.48699e-05	0	0	0	0	0	0	0	0	0	0	0	0	0	0	0	k__Bacteria;p__Proteobacteria;c__Gammaproteobacteria;o__Enterobacterales
OTU_1455	0	0	0	0	0	0	0	0	0	0	0	0	0	0	0	0	0	0	0	3.48699e-05	0	0	0	0	0	0	0	0	0	0	0	0	0	0	0	0	Unknown
OTU_1456	3.48699e-05	0	0	1.7435e-05	0	0	6.97399e-05	0	0	1.7435e-05	0	0	0	0	0	0	0	0	0	0	0	0	0	0	0	0	0	8.71748e-05	0	0	0.000122045	0	0	8.71748e-05	0	0	k__Bacteria;p__Proteobacteria;c__Gammaproteobacteria;o__Aeromonadales;f__Aeromonadaceae;g__Aeromonas
OTU_1457	0	0	0	0	0	0	0	0	0	0	0	0	0	0	0	0	0	0	0	0	0	0	0	0	0	0	0	0	0	0	0	0	3.48699e-05	0	0	0	k__Bacteria;p__Myxococcota;c__Polyangia;o__Haliangiales;f__Haliangiaceae;g__Haliangium
OTU_1458	0	0	0	0	0	1.7435e-05	0	0	0	0	0	0	0	0	0	0	0	5.23049e-05	0	0	0	0	0	5.23049e-05	0	0	1.7435e-05	0	0	1.7435e-05	0	3.48699e-05	0	0	0	0	k__Bacteria;p__unidentified_Bacteria;c__Alphaproteobacteria;o__Micropepsales;f__Micropepsaceae;g__;s__
OTU_1459	0	0	0	0	0	0	0	0	0	0	0	0	0	0	0	0	0	0	0	8.71748e-05	0	0	0	0	0	0	0	0	0	0	0	0	0	0	0	3.48699e-05	k__Bacteria;p__Bdellovibrionota;c__Bdellovibrionia;o__Bdellovibrionales;f__Bdellovibrionaceae;g__Bdellovibrio;s__
OTU_1460	0	0	0	0	0	0	0	0	0	0	0	0	0	0	0	0	0	0	0	0	0	0	0	0	0	0	0	0	0	0	0	0	0	0	0	0	k__Bacteria;p__Bacteroidota;c__Bacteroidia;o__Chitinophagales;f__Chitinophagaceae;g__Ferruginibacter;s__
OTU_1461	0	0	3.48699e-05	0	0	0	0	0	0	0	0	1.7435e-05	0	0	0	0	0	0	0	0	0	0	0	3.48699e-05	0	0	0	0	0	0	0	0	0	0	0	0	k__Bacteria;p__unidentified_Bacteria;c__Alphaproteobacteria;o__Micavibrionales;f__;g__;s__
OTU_1462	0	0	0	0	0	0	0	0	0	0	0	0	0	0	1.7435e-05	0	0	0	0	0	1.7435e-05	0	0	0	0	0	0	0	0	6.97399e-05	0	0	3.48699e-05	0	0	0	k__Bacteria;p__Actinobacteriota;c__Actinobacteria;o__Propionibacteriales;f__Nocardioidaceae;g__Nocardioides
OTU_1463	0	0	0	0	0	0	0	0	0	0	0	0	0	0	0	0	0	0	0	0	0	0	0	0	0	3.48699e-05	0	0	0	0	0	0	0	0	0	0	k__Bacteria;p__Acidobacteriota;c__Acidobacteriae;o__Bryobacterales;f__Bryobacteraceae;g__Bryobacter;s__Acidobacteria_bacterium_LX128
OTU_1464	0	0	0	3.48699e-05	0	0	0	0	0	0	0	0	0	0	0	0	0	0	0	0	0	0	0	0	0	0	0	0	0	0	0	0	0	0	0	0	k__Bacteria
OTU_1465	0	0	0	0	0	0	0	0	0	0	0	0	0	0	0	0	0	0	0	0	0	0	0	0	3.48699e-05	0	0	0	0	0	3.48699e-05	0	0	0	0	0	k__Bacteria;p__Firmicutes;c__Clostridia;o__Oscillospirales;f__[Eubacterium]_coprostanoligenes_group;g__;s__
OTU_1466	0	0	0	0	0	0	0	0	0	0	3.48699e-05	0	0	0	0	0	0	0	0	0	0	0	0	0	0	0	0	0	0	0	0	0	0	0	3.48699e-05	0	k__Bacteria;p__unidentified_Bacteria;c__Myxococcia;o__Myxococcales;f__Myxococcaceae;g__;s__
OTU_1467	0	0	0	0	0	0	0	0	0	0	0	0	0	0	0	0	0	0	0	0	0	0	5.23049e-05	0	0	0	0	0	0	0	0	0	0	0	0	0	k__Bacteria;p__Acidobacteriota;c__Holophagae;o__Subgroup_7;f__;g__;s__
OTU_1468	0	0	0	0	0	0	5.23049e-05	0	0	0	0	0	0	0	0	0	0	0	0	0	0	0	0	0	0	0	0	0	0	0	0	0	0	0	0	0	Unknown
OTU_1469	0	0	0	0	0	0	0	0	0	0	0	0	0	0	0	0	0	0	0	0	0	0	0	0	0	0	0	0	0	0	0	0	0	0	5.23049e-05	0	k__Bacteria;p__Proteobacteria;c__Gammaproteobacteria;o__Diplorickettsiales;f__Diplorickettsiaceae;g__Aquicella;s__
OTU_1470	0	0	0	1.7435e-05	0	0	0	0	0	0	0	0	0	0	0	0	0	0	0	0	0	0	0	0	0	0	0	0	0	0	0	0	0	3.48699e-05	0	0	k__Bacteria;p__Proteobacteria;c__Gammaproteobacteria;o__Burkholderiales;f__Oxalobacteraceae
OTU_1471	0	0	0	0	0	0	0	0	0	0	0	0	0	0	0	0	0	0	0	0	0	0	0	0	0	0	0	0	0	0	6.97399e-05	0	0	5.23049e-05	0	1.7435e-05	k__Bacteria;p__Acidobacteriota;c__Acidobacteriae;o__Bryobacterales;f__Bryobacteraceae;g__Bryobacter;s__
OTU_1472	0	0	0	0	0	0	0	0	0	0.00010461	1.7435e-05	0	0	0	0	0	0	0	0	0	0	0	0	0	0	0	0	0	0	0	0	0	0	0	3.48699e-05	0	k__Bacteria;p__Proteobacteria;c__Gammaproteobacteria;o__Enterobacterales;f__Yersiniaceae;g__Serratia
OTU_1473	0	0	0	0	0	0	0	6.97399e-05	3.48699e-05	0	0	0	0	0	0	0	0	0	3.48699e-05	0	0	0	0	0	0	0	0	0	0	0	0	0	0	0	1.7435e-05	0	k__Bacteria;p__Firmicutes;c__Clostridia;o__Oscillospirales;f__Oscillospiraceae;g__Oscillibacter;s__
OTU_1474	0	0	0	0	0	0	0	0.000836878	0.00106353	0	0	0	0	0	0	0	1.7435e-05	0	3.48699e-05	3.48699e-05	0	0	0	0	0	0	0	0	0	0	0	0	0	0	0	0	k__Bacteria;p__Firmicutes;c__Clostridia;o__Oscillospirales;f__Oscillospiraceae;g__Colidextribacter;s__
OTU_1475	0	0	0	0	0	0	0	0	0	0	0	0	0	0	0	0	3.48699e-05	0	0	0	0	0	0	0	0	0	0	0	0	0	0	0	0	0	0	0	k__Bacteria
OTU_1476	0	0	0	0	0	0	0	0	0	0	0	0	0	0	0	0	5.23049e-05	0	0	0	0	0	0	0	0	0	0	0	0	0	0	0	0	0	0	0	Unknown
OTU_1477	0	0	0	0	0	0	0	3.48699e-05	5.23049e-05	0	0	0	0	0	0	0	0	0	0	0	0	3.48699e-05	0	0	0	0	0	0	0	0	0	0	0	0	0	0	k__Bacteria;p__Firmicutes;c__Clostridia;o__Lachnospirales;f__Lachnospiraceae;g__Marvinbryantia;s__
OTU_1478	0	0	0	5.23049e-05	0	0	0.000575354	0.00148197	0.00186554	0.00017435	0	0	3.48699e-05	0	0	3.48699e-05	1.7435e-05	0	0	1.7435e-05	0	1.7435e-05	0	0	0.000749704	0	0	6.97399e-05	0	0	8.71748e-05	0	0	6.97399e-05	0	0	k__Bacteria;p__Firmicutes;c__Clostridia;o__Lachnospirales;f__Lachnospiraceae
OTU_1479	0	0	0	0	0	0	0	0	0	0	0	6.97399e-05	0	0	0	0	1.7435e-05	3.48699e-05	0	0	0	0	0	0	0	0	0	0	0	0	0	0	0	0	0	0	k__Bacteria;p__Firmicutes;c__Bacilli;o__Bacillales;f__Bacillaceae;g__Bacillus;s__Bacillus_azotoformans
OTU_1480	0	0	0	0	0	0	0	0	0	0	0	0	0	0	0	0	0	0.00017435	0	0	0	0	0	0	0	0	1.7435e-05	0	0	0	0	0	0	0	0	0	k__Bacteria;p__Myxococcota;c__Polyangia;o__Polyangiales;f__BIrii41;g__;s__
OTU_1481	0	0	3.48699e-05	0	0	0	0	0	0	0	0	0	0	0	1.7435e-05	0	0	0	0	0	0	0	0	0	0	0	0	0	0	0	0	0	0	0	0	0	k__Bacteria;p__Chloroflexi;c__Chloroflexia;o__Thermomicrobiales;f__JG30-KF-CM45;g__;s__
OTU_1482	1.7435e-05	0	0	5.23049e-05	0	0	0	0	0	0	0	0	0	0	0	0	0	0	0	0	0	0	0	0	3.48699e-05	0	0	0	0	0	1.7435e-05	0	0	3.48699e-05	0	0	k__Bacteria;p__Proteobacteria;c__Gammaproteobacteria;o__Alteromonadales;f__Alteromonadaceae;g__Rheinheimera
OTU_1483	0	0	0	0	0	0	0	0	0	0	0	0	0	0	0	0	0	0	0	0	0	0	0	0	0	0	0	0	0	0	5.23049e-05	0	0	0	0	0	Unknown
OTU_1484	0	0	0	0	0	0	0	1.7435e-05	0	0	0	0	0	0	0	0	0	0	1.7435e-05	0	0	0	0	0	0	0	0	0	0	0	0	0	0	0	0	0	k__Bacteria;p__Firmicutes;c__Clostridia;o__Oscillospirales;f__Ruminococcaceae;g__Anaerotruncus;s__
OTU_1485	0	0	0	0	0	0	0	8.71748e-05	0.00013948	0	0	0	0	0	0	0	0	0	0	0	0	8.71748e-05	0	0	0	0	0	0	0	0	0	0	0	0	0	0	k__Bacteria;p__Firmicutes;c__Clostridia;o__Clostridia_UCG-014;f__;g__;s__
OTU_1486	0	0	0	0	0	0	0	3.48699e-05	6.97399e-05	0	0	0	0	0	0	0	0	0	0	0	0	0	0	0	0	0	0	0	0	0	0	0	0	0	0	0	k__Bacteria
OTU_1487	0	5.23049e-05	3.48699e-05	0	8.71748e-05	0.00010461	0	0	0	0	0.000122045	0.00013948	0	8.71748e-05	8.71748e-05	0	0	0	0	0.00010461	0	0	0	3.48699e-05	0	6.97399e-05	0.00010461	0	1.7435e-05	0	0	6.97399e-05	0	0	6.97399e-05	0.00013948	k__Bacteria;p__unidentified_Bacteria;c__Acidobacteriae;o__Acidobacteriales;f__Acidobacteriaceae_(Subgroup_1);g__;s__
OTU_1488	0	0	0	0	0	0	0	0	0	0	5.23049e-05	0	0	0	0	0	0	0	0	0	0	0	0	0	0	0	0	0	0	0	0	0	0	0	0	0	k__Bacteria;p__unidentified_Bacteria;c__Anaerolineae;o__Caldilineales;f__Caldilineaceae;g__;s__
OTU_1489	0	0	1.7435e-05	0	0	0	0	0	0	0	3.48699e-05	0	1.7435e-05	0	0	0	0	0	0	0	0	0	0	0	0	0	0	3.48699e-05	0	0	0	0	0	6.97399e-05	0	0	k__Bacteria;p__Proteobacteria;c__Alphaproteobacteria;o__Rhizobiales
OTU_1490	0	0	0	0	0	0	0	0	0	0	0	3.48699e-05	0	1.7435e-05	0	0	0	0	0	1.7435e-05	0	0	0	0	0	0	0	0	0	0	0	0	0	0	0	0	k__Bacteria;p__Actinobacteriota;c__Actinobacteria;o__Catenulisporales;f__Catenulisporaceae;g__Catenulispora;s__
OTU_1491	0	0	0	0	0	0	0	0	0	0	0	5.23049e-05	0	0	0	0	0	0	0	0	0	0	0	0	0	0	0	0	0	0	0	0	0	0	0	0	k__Bacteria;p__Proteobacteria;c__Gammaproteobacteria;o__Burkholderiales;f__Rhodocyclaceae;g__Azospira
OTU_1492	0	0	0	0	3.48699e-05	0	0	0	0	0	1.7435e-05	5.23049e-05	0	0	0	0	0	0	0	0	0	0	0	0	0	0	1.7435e-05	0	0	0	0	1.7435e-05	0	0	0	1.7435e-05	k__Bacteria;p__Actinobacteriota;c__Thermoleophilia;o__Solirubrobacterales;f__67-14;g__;s__
OTU_1493	0	0	0	0	0	0	0	0	0	0	0	0	0	0	0	0	0	0	0	3.48699e-05	0	0	0	0	0	0	0	0	0	0	0	0	0	0	0	0	k__Bacteria;p__Firmicutes;c__Clostridia;o__Christensenellales;f__Christensenellaceae
OTU_1494	0	0	0	0	0	0	0	0	0	0	0	0	0	0	0	0	0	0	0	0	0	0	0	0	8.71748e-05	0	0	0	0	0	1.7435e-05	0	0	1.7435e-05	0	0	k__Bacteria;p__Bacteroidota;c__Bacteroidia;o__Sphingobacteriales;f__AKYH767;g__;s__
OTU_1495	0	0	0	0	0	0	0	0	0	0	0	0	0	0	0	0	0	0	0	0	0	0	0	0	0	0	0	0	0	0	1.7435e-05	0	0	0	0	0	k__Bacteria;p__unidentified_Bacteria;c__unidentified_Bacteria;o__Actinomycetales;f__Actinomycetaceae;g__;s__
OTU_1496	0	0	0	0	0	0	0	0	0	0	0	0	0	1.7435e-05	0	0	0	0	0	0	0	0	0	0	0	0	0	0	0	0	0	0	0	0	0	0	k__Bacteria;p__unidentified_Bacteria;c__Saccharimonadia;o__Saccharimonadales;f__LWQ8;g__;s__
OTU_1497	0	0	0	0	0	0	0	0	0	0	0	0	0	0	0	0	0	0	0	0	0	0	0	0	0	0	0	0	0	0	0	0	0	0	3.48699e-05	0	k__Bacteria;p__unidentified_Bacteria;c__Clostridia;o__Oscillospirales;f__Ruminococcaceae;g__;s__
OTU_1498	0	0	0	0	0	0	0	0	0	0	1.7435e-05	0	0	0	0	0	0	0	0	0	0	3.48699e-05	0	0	0	0	0	0	0	0	0	5.23049e-05	0	0	0	0	k__Bacteria;p__WPS-2;c__;o__;f__;g__;s__
OTU_1499	0	0	0	0	3.48699e-05	0	0	0	0	0	0	0	0	1.7435e-05	0	0	0	0	0	0	0	0	0	0	0	0	0	0	0	0	0	0	0	0	0	0	k__Bacteria;p__Actinobacteriota;c__Actinobacteria;o__Propionibacteriales;f__Nocardioidaceae;g__Nocardioides;s__
OTU_1500	0	0	0	0	0	0	0	0	0	0	0	0	0	0	0	0	0	0	0	0	0	0	0	0	0	0	0	1.7435e-05	0	0	8.71748e-05	0	0	0	0	0	k__Bacteria;p__Proteobacteria;c__Alphaproteobacteria;o__Rhizobiales;f__Beijerinckiaceae;g__Psychroglaciecola;s__
OTU_1501	0	0	0	0	0	3.48699e-05	0	0	0	0	0	0	0	0	0	0	0	0	0	0	0	0	0	0	0	0	5.23049e-05	0	0	0	0	0	0	0	0	0	k__Bacteria;p__Cyanobacteria;c__Cyanobacteriia;o__Chloroplast
OTU_1502	0	0	6.97399e-05	0	3.48699e-05	0	0	0	0	0	0	0	0	0	0.00013948	0.000122045	0.00013948	5.23049e-05	0	0	8.71748e-05	0	0	0	0	0	0	0	0	3.48699e-05	0	0	0	0	0	0	k__Bacteria;p__Actinobacteriota;c__Actinobacteria;o__Micrococcales;f__Cellulomonadaceae;g__Oerskovia
OTU_1503	0	0	0	0	0	0	0	5.23049e-05	0	0	0	0	0	0	0	0	0	0	0	0	0	0	0	0	0	0	0	0	0	0	0	0	0	0	0	0	k__Bacteria;p__Firmicutes;c__Clostridia;o__Peptostreptococcales-Tissierellales;f__Anaerovoracaceae;g__Family_XIII_AD3011_group;s__
OTU_1504	0	0	0	0	0	0	0	0	0	0	0	0	0	0	0	0	0	0	0	0	0	0	0	0	3.48699e-05	0	0	0	0	0	0	0	0	0	0	0	k__Bacteria;p__unidentified_Bacteria;c__Bacteroidia;o__Chitinophagales;f__;g__;s__
OTU_1505	0	0	0	0	0	0	0	0	0	0	0	0	0	3.48699e-05	0	0	0	0	0	0	0	0	0	0	0	0	0	0	0	0	0	0	0	0	0	0	k__Bacteria;p__Bdellovibrionota;c__Bdellovibrionia;o__Bdellovibrionales;f__Bdellovibrionaceae;g__;s__
OTU_1506	6.97399e-05	0	0	0	0	0	1.7435e-05	0	3.48699e-05	1.7435e-05	0	0	0	0	0	0	0	0	0	0	0	0	0	0	0	0	0	1.7435e-05	0	0	0.00010461	0	0	3.48699e-05	0	0	k__Bacteria;p__Bacteroidota;c__Bacteroidia;o__Flavobacteriales;f__Weeksellaceae;g__Cloacibacterium;s__
OTU_1507	0	1.7435e-05	0	0	0	0	0	0	0	0	1.7435e-05	1.7435e-05	0	0	1.7435e-05	0	0	1.7435e-05	0	0	0	0	0	0	0	0	0	0	0	0	0	1.7435e-05	0	0	0	0	k__Bacteria;p__Chloroflexi;c__Chloroflexia;o__Thermomicrobiales;f__JG30-KF-CM45;g__;s__
OTU_1508	1.7435e-05	0	0	5.23049e-05	0	0	1.7435e-05	0	0	0	0	0	0	0	0	0	0	0	0	0	0	0	0	0	0	0	0	0	0	0	0	0	0	0	0	0	k__Bacteria
OTU_1509	0	0	0	0	0	0	0	0	0	0	0	0	0	0	1.7435e-05	0	1.7435e-05	0	0	0	0	0	0	0	0	0	0	0	0	0	0	0	0	0	0	1.7435e-05	k__Bacteria;p__Myxococcota;c__Myxococcia;o__Myxococcales;f__Anaeromyxobacteraceae;g__Anaeromyxobacter
OTU_1510	0	1.7435e-05	0	0	0	1.7435e-05	0	0	0	0	0	3.48699e-05	0	0	0	0	0	0.00010461	0	1.7435e-05	5.23049e-05	0	0	5.23049e-05	0	0	3.48699e-05	0	1.7435e-05	8.71748e-05	0	0.00010461	0	0	1.7435e-05	5.23049e-05	k__Bacteria;p__Proteobacteria;c__Alphaproteobacteria;o__Caulobacterales;f__Caulobacteraceae;g__Asticcacaulis;s__
OTU_1511	0	0	0	1.7435e-05	0	3.48699e-05	0	0	0	0	0	0	0	0	3.48699e-05	0	0	0	0	0	0	0	0	0	0	0	0	0	0	0	0	0	0	0	0	0	k__Bacteria;p__Proteobacteria;c__Gammaproteobacteria
OTU_1512	0	0	0	0	5.23049e-05	0	0	0	0	0	0	0	0	0	0	0	0	0	0	0	0	0	0	0	0	1.7435e-05	0	0	0	0	0	0	0	0	0	0	k__Bacteria;p__Myxococcota;c__Polyangia;o__Polyangiales;f__BIrii41
OTU_1513	0	0	0	0	0	0	0	0	3.48699e-05	0	0	0	0	0	0	0	0	0	0	0	0	0	0	0	0	0	0	0	0	0	0	0	0	0	0	0	k__Bacteria;p__Firmicutes;c__Clostridia;o__Oscillospirales;f__Oscillospiraceae;g__UCG-005;s__
OTU_1514	0	0	0	0	0	0	0	0	0	0	0	0	0	0	0	0	0	0	0	0	0	0	0	0	0	1.7435e-05	0	0	0	0	0	0	0	0	0	0	k__Bacteria;p__unidentified_Bacteria;c__Alphaproteobacteria;o__Elsterales;f__;g__;s__
OTU_1515	0	0	0	0	0	0	0	0	0	0	0	0	1.7435e-05	0	0	0	0	0	0	0	0	0	0	0	0	0	0	0	0	0	0	0	0	0	0	0	k__Bacteria;p__unidentified_Bacteria;c__unidentified_Bacteria;o__Gemmatimonadales;f__Gemmatimonadaceae;g__;s__
OTU_1516	0	1.7435e-05	0	0	0	3.48699e-05	0	0	0	0	0	1.7435e-05	0	0	0	0	0	0	0	3.48699e-05	0	0	0	0	0	5.23049e-05	0	0	0	0	0	0	0	0	0	3.48699e-05	k__Bacteria;p__Proteobacteria;c__Gammaproteobacteria;o__Xanthomonadales;f__Rhodanobacteraceae;g__Chujaibacter;s__
OTU_1517	0	0	0	0	0	0	0	0	0	0	0	0	1.7435e-05	0	0	0	0	0	0	0	0	0	0	0	0	0	0	0	0	0	0	0	0	0	0	0	k__Bacteria;p__Chloroflexi;c__Anaerolineae;o__SBR1031;f__A4b;g__;s__
OTU_1518	0	0	0	1.7435e-05	0	0	0.000122045	0	0	3.48699e-05	0	0	0	0	0	0	0	0	0	0	0	0	0	0	0.000418439	0	0	1.7435e-05	0	0	3.48699e-05	0	0	1.7435e-05	0	0	k__Bacteria;p__Firmicutes;c__Clostridia;o__Clostridia_UCG-014;f__;g__;s__
OTU_1519	0	0	0	0	0	0	0	0	0	0	0	0	1.7435e-05	0	1.7435e-05	0	0	0	0	0	5.23049e-05	0	0	0	0	0	3.48699e-05	0	0	3.48699e-05	0	1.7435e-05	0	0	0	0	k__Bacteria;p__Proteobacteria;c__Alphaproteobacteria;o__Rhizobiales;f__Labraceae;g__Labrys;s__
OTU_1520	0	0	0	0	0	0	0	0	1.7435e-05	0	0	0	0	0	0	0	0	0	0	0	0	0	0	0	0	0	0	0	0	0	0	0	0	0	0	0	k__Bacteria;p__Firmicutes;c__Clostridia
OTU_1521	0	1.7435e-05	3.48699e-05	0	0	0	0	0	0	0	0	0	0	0	1.7435e-05	0	0	0	0	0	0	0	0	0	0	0	0	0	0	0	0	0	0	0	0	0	k__Bacteria;p__Proteobacteria;c__Alphaproteobacteria;o__Azospirillales;f__Azospirillaceae;g__Skermanella;s__
OTU_1522	0	0	0	0	0	0	0	0	0	0	0	0	0	0	0	0	0	0	0	1.7435e-05	0	0	0	0	0	0	0	0	0	0	0	0	0	0	0	0	k__Bacteria;p__Planctomycetes;c__unidentified_Planctomycetes;o__Gemmatales;f__Gemmataceae;g__Gemmata;s__
OTU_1523	0	0	0	0	0	0	0	1.7435e-05	5.23049e-05	0	0	0	0	0	0	0	0	0	0	0	0	0	0	0	0	0	0	0	0	0	0	0	0	0	0	0	k__Bacteria;p__Bacteroidota;c__Bacteroidia;o__Bacteroidales;f__Rs-E47_termite_group;g__;s__
OTU_1524	0	0	0	0	0	0	0	5.23049e-05	0	0	0	0	0	0	0	0	0	0	0	0	0	0	0	0	0	0	0	0	0	0	0	0	0	0	0	0	k__Bacteria
OTU_1525	0	0	0	0	0	0	0	0	0	0	0	0	0	0	0	0	0	0	0	0	0	0	6.97399e-05	0	0	0	0	0	0	0	0	0	0	0	0	0	k__Bacteria;p__Sumerlaeota;c__Sumerlaeia;o__Sumerlaeales;f__Sumerlaeaceae;g__Sumerlaea;s__
OTU_1526	0	0	0	0	0	0	0	5.23049e-05	5.23049e-05	0	0	0	0	0	0	0	0	0	0	0	0	0	0	0	0	0	0	0	0	0	0	0	0	0	0	0	k__Bacteria;p__Bacteroidota;c__Bacteroidia;o__Bacteroidales;f__Muribaculaceae
OTU_1527	0	0	0	0	0	0	0	0	0	0	0	0	0.00010461	0	0	0	0	0	0	0	0	0	0	0	0	0	0	0	0	0	0	0	0	0	0	0	k__Bacteria;p__unidentified_Bacteria;c__Polyangia;o__Polyangiales;f__Sandaracinaceae;g__;s__
OTU_1528	0	0	0	0	0	0	1.7435e-05	0	0	0	0	0	0	0	0	0	0	0	0	1.7435e-05	0	0	0	0	0	0	0	0	0	0	0	0	0	0	0	0	k__Bacteria
OTU_1529	0	0	0	0	0	0	3.48699e-05	0	0	0	0	0	0	0	0	0	0	0	0	0	0	0	0	0	1.7435e-05	0	0	0	0	0	0	0	0	0	0	0	k__Bacteria;p__Firmicutes;c__Clostridia;o__Lachnospirales;f__Lachnospiraceae;g__Lachnospiraceae_ND3007_group;s__
OTU_1530	0	0	0	0	0	0	0	0	0	0	0	0	0	0	0	0	0	0	0	0	0	0	0	0	6.97399e-05	0	0	3.48699e-05	0	0	1.7435e-05	0	0	1.7435e-05	0	0	k__Bacteria;p__Proteobacteria;c__Gammaproteobacteria;o__Competibacterales;f__Competibacteraceae;g__Candidatus_Competibacter;s__
OTU_1531	0	0	0	0	0	0	0	0	0	0	0	0	1.7435e-05	0	0	0	0	0	0	0	0	0	0	0	0	0	0	0	0	0	0	0	0	0	0	0	k__Bacteria;p__Bdellovibrionota;c__Bdellovibrionia;o__Bdellovibrionales;f__Bdellovibrionaceae;g__;s__
OTU_1532	0	0	0	0	0	0	0	0	0	0	0	0	0	0	0	0	0	0	0	0	0	0	0	0	0	0	0	0	0	0	6.97399e-05	0	0	0	0	0	k__Bacteria;p__Proteobacteria;c__Gammaproteobacteria
OTU_1533	0	0	0	0	0	0	0	0	0	0	0	0	0	0	0	0	0	0	0	0	0	0	0	0	0	0	0	0	0	0	0	0	0	0	0	0	k__Bacteria;p__Cyanobacteria;c__Cyanobacteriia;o__Chloroplast;f__unidentified_Chloroplast;g__unidentified_Chloroplast
OTU_1534	0	0	0	0	1.7435e-05	0	0	0	0	0	0	0	0	3.48699e-05	3.48699e-05	0	5.23049e-05	0	0	3.48699e-05	0	0	0	0	0	0	1.7435e-05	0	0	0	0	0	0	0	1.7435e-05	0	k__Bacteria;p__Firmicutes;c__Bacilli;o__Paenibacillales;f__Paenibacillaceae;g__Paenibacillus;s__Paenibacillus_alginolyticus
OTU_1535	0	0	0	0	3.48699e-05	0	0	0	0	0	0	0	0	0	3.48699e-05	0	0	0	0	0	0	0	0	0	0	0	0	0	0	0	0	0	0	0	0	0	k__Bacteria;p__Proteobacteria;c__Alphaproteobacteria;o__Rickettsiales;f__AB1;g__;s__
OTU_1536	0	0	0	0	0	0	0	0	0	0	0	0	0	0	0	0	0	0	0	0	0	0	0	0	0	0	0	3.48699e-05	0	0	0	0	0	0	0	0	k__Bacteria
OTU_1537	0	0	0	0	0	0	0	0	0	0	0	0	0	0	0	0	0	0	0	0	0	0	0	0	0	0	0	0	0	0	6.97399e-05	0	0	0	0	0	Unknown
OTU_1538	0	0	3.48699e-05	0	0	0	0	0	0	0	0	0	0	0	0	0	0	0	0	0	0	0	0	0	0	0	0	0	0	0	0	0	0	0	0	0	k__Bacteria;p__unidentified_Bacteria;c__Alphaproteobacteria;o__;f__;g__;s__
OTU_1539	0	1.7435e-05	0	0	0	0	0	0	0	0	0	0	0	3.48699e-05	0	0	0	0	0	0	0	0	0	0	0	0	0	0	0	0	0	0	0	0	1.7435e-05	0	k__Bacteria;p__Verrucomicrobiota;c__Verrucomicrobiae;o__Pedosphaerales;f__Pedosphaeraceae;g__Ellin517;s__
OTU_1540	0	0	0	0	0	1.7435e-05	0	0	0	0	0	0	0	0	0	0	0	0	0	0	0	0	0	0	0	0	0	0	0	0	0	0	0	0	0	0	k__Bacteria;p__unidentified_Bacteria;c__Bacteroidia;o__Cytophagales;f__Microscillaceae;g__;s__
OTU_1541	0	0	0	0	0	1.7435e-05	0	0	0	0	1.7435e-05	0	1.7435e-05	0	0	0	0	0	0	0	0	0	0	1.7435e-05	0	0	3.48699e-05	0	0	0	0	0	0	0	1.7435e-05	1.7435e-05	k__Bacteria;p__Proteobacteria;c__Gammaproteobacteria;o__JG36-TzT-191;f__;g__;s__
OTU_1542	0	0	0	0	0	0	0	0	0	0	0	0	0	0	0	0	0	0	0	0	0	0	0	0	0	0	0	0	0	3.48699e-05	0	0	0	0	0	0	k__Bacteria
OTU_1543	0	0	0	0	0	0	0	0	0	0	3.48699e-05	0	0	0	0	0	0	0	0	0	0	0	0	0	0	0	0	0	0	0	0	0	0	0	0	0	k__Bacteria;p__unidentified_Bacteria;c__Alphaproteobacteria;o__Micavibrionales;f__;g__;s__
OTU_1544	0	0	0	0	0	0	0	0	0	0	0	0	0	0	0	0	0	0	0	0	0	0	0	0	0	0	0	0	0	1.7435e-05	0	0	0	0	0	0	k__Bacteria;p__Actinobacteriota;c__Actinobacteria
OTU_1545	0	0	0	0	0	0	0	0	0	0	0	0	0	0	0	0	0	1.7435e-05	0	0	0	0	0	0	1.7435e-05	0	0	0	0	0	1.7435e-05	0	0	5.23049e-05	0	0	k__Bacteria;p__Bacteroidota;c__Bacteroidia;o__Flavobacteriales;f__Flavobacteriaceae;g__Flavobacterium
OTU_1546	0	0	0	0	0	0	0	0	0	0	0	0	0	0	0	0	0	1.7435e-05	0	0	0	0	0	0	0	0	0	0	0	0	0	0	0	0	0	0	k__Bacteria
OTU_1547	3.48699e-05	0	3.48699e-05	0.000226655	0	3.48699e-05	6.97399e-05	0	0	0.000366134	1.7435e-05	0	0	0	0	0	6.97399e-05	1.7435e-05	0	3.48699e-05	1.7435e-05	0	0	0	0.00102866	0	1.7435e-05	0.000278959	0	0	0.000366134	6.97399e-05	0	0.000296394	0	0	k__Bacteria;p__Proteobacteria;c__Gammaproteobacteria;o__Burkholderiales;f__Comamonadaceae;g__Rhodoferax;s__
OTU_1548	0	0	0	0	0	0	0	0	0	0	0	0	0	0	0	0	0	0	0	0	0	0	0	0	5.23049e-05	0	0	0	0	0	0	0	0	0	0	0	k__Bacteria
OTU_1549	0	0	0	0	0	3.48699e-05	0	0	0	0	5.23049e-05	0	0	0	0	0	0	3.48699e-05	0	0	0	0	0	0	0	0	8.71748e-05	0	0	0	0	0.00013948	0	0	6.97399e-05	1.7435e-05	k__Bacteria
OTU_1550	5.23049e-05	0	0	0	0	0	0	0	0	0	0	0	0	0	0	0	0	0	0	0	0	0	0	0	0	0	0	0	0	0	0	0	0	0	0	0	k__Bacteria
OTU_1551	0	0	0	0	0	0	0	0	0	0	0	0	0	0	0	0	0	0	0	0	0	0	0	0	0	0	0	0	0	0	0	0	0	1.7435e-05	0	0	k__Bacteria;p__Proteobacteria;c__Gammaproteobacteria;o__Burkholderiales;f__Oxalobacteraceae
OTU_1552	0	0	0	0	0	0	0	0	0	0	0	0	0	0	0	0	0	0	0	0	0	0	0	0	0	0	0	0	0	0	0	5.23049e-05	0	0	0	0	k__Bacteria;p__Gemmatimonadetes;c__unidentified_Gemmatimonadetes;o__Gemmatimonadales;f__Gemmatimonadaceae;g__Gemmatimonas;s__
OTU_1553	0	1.7435e-05	0	0	0	0	0	0	0	0	0	0	0	0	0	0	0	0	0	0	0	0	0	0	0	0	0	0	0	0	0	0	0	0	0	0	k__Bacteria;p__Proteobacteria;c__Gammaproteobacteria;o__Legionellales;f__Legionellaceae;g__Legionella
OTU_1554	0	0	0	0	0	0	0	0	0	0	0	0	0	0	0	0	0	0	0	0	0	0	0	0	0	0	0	0	0	0	0	1.7435e-05	0	0	0	0	k__Bacteria;p__Acidobacteriota;c__Acidobacteriae;o__Acidobacteriales;f__Acidobacteriaceae_(Subgroup_1);g__Granulicella
OTU_1555	0	0	0	0	0	0	0	0	0	0	0	0	0	3.48699e-05	0	0	0	0	0	0	0	0	0	0	0	0	0	0	0	0	0	0	0	0	0	0	k__Bacteria;p__Myxococcota;c__Polyangia;o__mle1-27;f__;g__;s__
OTU_1556	0	0	0	0	0	6.97399e-05	0	0	0	0	0	0	0	0	0	0	0	0	0	0	0	0	0	0	0	0	1.7435e-05	0	0	0	0	0	0	0	0	0	k__Bacteria;p__Proteobacteria;c__Gammaproteobacteria;o__Burkholderiales;f__TRA3-20;g__;s__
OTU_1557	0	0	0	0	0	0	0	0	6.97399e-05	0	0	0	0	0	0	0	0	0	0	0	0	0	0	0	0	0	0	0	0	0	0	0	0	0	0	0	Unknown
OTU_1558	3.48699e-05	0	3.48699e-05	1.7435e-05	3.48699e-05	0	0	0	0	3.48699e-05	6.97399e-05	0	0	0	0	0	5.23049e-05	1.7435e-05	0	3.48699e-05	0	0	0	0	0.00020922	1.7435e-05	5.23049e-05	3.48699e-05	0	0	6.97399e-05	5.23049e-05	0	3.48699e-05	0	0	k__Bacteria;p__Proteobacteria;c__Gammaproteobacteria;o__Burkholderiales;f__Comamonadaceae
OTU_1559	0	0	0	0	0	0	0	0	0	1.7435e-05	0	0	0	0	0	0	0	0	0	0	0	0	0	0	0	0	0	0	0	0	0	0	0	0	0	0	k__Bacteria
OTU_1560	0	0	0	0	0	0	0	0	0	0	5.23049e-05	0	0	0	0	0	0	0	0	0	0	0	0	0	0	0	0	0	0	0	0	0	0	0	0	0	k__Bacteria;p__Proteobacteria;c__Gammaproteobacteria;o__Burkholderiales;f__Gallionellaceae
OTU_1561	0	1.7435e-05	0	0	0	5.23049e-05	0	0	0	0	0	0	0	0	5.23049e-05	0	0	0	0	0	0	0	0	0	0	0	8.71748e-05	0	0	0	0	0	0	0	0	0	k__Bacteria;p__Acidobacteriota;c__Vicinamibacteria;o__Vicinamibacterales;f__Vicinamibacteraceae;g__;s__
OTU_1562	0	0	0	0	0	0	1.7435e-05	0	0	0	0	0	3.48699e-05	0	0	0	0	0	0	0	0	0	0	0	0	0	0	0	0	0	0	0	0	0	0	0	k__Bacteria;p__Proteobacteria;c__Alphaproteobacteria;o__Acetobacterales;f__Acetobacteraceae
OTU_1563	0	0	0	0	0	0	0	0	0	0	0	3.48699e-05	0	0	0	0	0	0	0	0	1.7435e-05	0	0	0	0	0	0	0	0	0	0	0	0	0	0	0	k__Bacteria;p__Bacteroidota;c__Bacteroidia;o__Chitinophagales;f__Chitinophagaceae;g__Edaphobaculum;s__
OTU_1564	0	0	0	0	0	0	0	0.00129019	0.00142967	0	0	0	0	0	0	0	0	0	0	0	0	0	0	0	0	0	0	0	0	0	0	0	0	0	0	0	k__Bacteria
OTU_1565	0	0	0	0	0	0	0	0	3.48699e-05	0	0	0	0	0	0	0	0	0	0	0	0	0	0	0	0	0	0	0	0	0	0	0	0	0	0	0	k__Bacteria;p__Desulfobacterota;c__Desulfovibrionia;o__Desulfovibrionales;f__Desulfovibrionaceae;g__Desulfovibrio
OTU_1566	0	0	0	0	0	0	0	0	0	0	0	0	0	1.7435e-05	0	0	0	0	0	0	0	0	0	0	0	0	0	0	0	0	0	0	0	0	0	0	Unknown
OTU_1567	0	0	0	0	1.7435e-05	0	0	0	0	0	0	0	0	0	5.23049e-05	0	0	0	0	0	0	0	0	0	0	1.7435e-05	0	0	0	0	0	1.7435e-05	0	0	0	0	k__Bacteria;p__Bacteroidota;c__Bacteroidia;o__Chitinophagales;f__Chitinophagaceae;g__Edaphobaculum
OTU_1568	0	0	0	0	0	0	0	0	0	0	0	0	1.7435e-05	1.7435e-05	0	0	1.7435e-05	0	0	0	0	0	0	0	0	0	0	0	0	0	0	0	0	0	0	0	k__Bacteria;p__Myxococcota;c__Polyangia;o__Polyangiales;f__BIrii41;g__;s__
OTU_1569	0	0	0	0	0	0	0	0	0	0	1.7435e-05	0	0	0	0	0	0	0	0	0	0	0	0	0	0	0	0	0	0	0	0	0	0	0	0	0	k__Bacteria;p__unidentified_Bacteria;c__unidentified_Bacteria;o__unidentified_Bacteria;f__unidentified_Bacteria;g__unidentified_Bacteria;s__delta_proteobacterium_WX81
OTU_1570	0	0	0	0	0	0	0	0	0	0	0	0	0	0	0	0	0.00010461	0	0	0	0	0	0	0	0	0	0	0	0	0	0	0	0	0	3.48699e-05	0	k__Bacteria;p__Bacteroidota;c__Bacteroidia;o__Bacteroidales;f__Muribaculaceae;g__;s__
OTU_1571	0	0	0	0	0	0	0	1.7435e-05	0	0	0	0	0	0	0	0	0	0	0	0	0	0	0	0	0	0	0	0	0	0	0	0	0	0	0	0	k__Bacteria;p__Firmicutes;c__Clostridia;o__Oscillospirales;f__Butyricicoccaceae;g__UCG-009
OTU_1572	0	0	0	0	0	0	0	0	0	0	0	0	0	0	0	0	0	0	0	0	0	0	0	0	0	0	3.48699e-05	0	0	0	0	1.7435e-05	0	0	0	0	k__Bacteria;p__Proteobacteria;c__Gammaproteobacteria;o__unidentified_Gammaproteobacteria;f__unidentified_Gammaproteobacteria;g__;s__
OTU_1573	0	0	0	0	0	0	0	0	0	0	5.23049e-05	0	0	0	0	0	0	0	0	0	0	0	0	0	0	0	3.48699e-05	0	0	0	0	0	0	0	0	0	k__Bacteria;p__Cyanobacteria;c__Cyanobacteriia;o__Chloroplast;f__unidentified_Chloroplast;g__unidentified_Chloroplast
OTU_1574	0	0	0	0	0	0	0	0	8.71748e-05	0	0	0	0	0	0	0	0	0	0	0	0	0	0	0	0	0	0	0	0	0	0	0	0	0	0	0	k__Bacteria;p__Bacteroidota;c__Bacteroidia;o__Bacteroidales;f__Muribaculaceae;g__;s__
OTU_1575	0	1.7435e-05	1.7435e-05	0	0	0	0	0	0	0	0	3.48699e-05	0	0	0	0	0	0	0	0	0	0	0	0	0	0	0	0	0	0	0	0	0	0	0	0	k__Bacteria;p__Bdellovibrionota;c__Bdellovibrionia;o__Bdellovibrionales;f__Bdellovibrionaceae;g__Bdellovibrio;s__
OTU_1576	0	1.7435e-05	0	0	0	0	0	0	0	0	0	0	0	0	0	0	0	5.23049e-05	0	0	1.7435e-05	0	0	0	1.7435e-05	0	0	8.71748e-05	0	5.23049e-05	0	0	0	0	0	0	k__Bacteria;p__Acidobacteriota;c__Thermoanaerobaculia;o__Thermoanaerobaculales;f__Thermoanaerobaculaceae;g__Subgroup_10;s__
OTU_1577	0	0	0	0	0	0	0	3.48699e-05	1.7435e-05	0	0	0	0	0	0	0	0	0	0	0	0	0	0	0	0	0	0	0	0	0	0	0	0	0	0	0	k__Bacteria
OTU_1578	0	0	0	0	0	0	0	5.23049e-05	0	0	0	0	0	0	0	0	0	0	0	0	0	0	0	0	0	0	0	0	0	0	0	0	0	0	0	0	k__Bacteria;p__unidentified_Bacteria;c__Bacilli;o__Erysipelotrichales;f__Erysipelotrichaceae;g__;s__
OTU_1579	0	0	0	0	0	0	0	0	0	0	0	0	0	0	0	0	0	0	0	0	0	0	0	0	0	0	0	0	0	0	0	0	0	0	3.48699e-05	0	k__Bacteria;p__Firmicutes;c__Clostridia;o__Oscillospirales;f__Oscillospiraceae;g__Sporobacter;s__
OTU_1580	0	0	0	0	0	0	0	0	0	0	0	0	0	0	0	0	0	0	0	0	0	0	0	3.48699e-05	0	0	0	0	0	0	0	0	0	0	0	0	k__Bacteria;p__Actinobacteriota;c__Acidimicrobiia;o__IMCC26256;f__;g__;s__
OTU_1581	0	5.23049e-05	0	0	1.7435e-05	5.23049e-05	0	0	0	0	0	0	0	0.00010461	5.23049e-05	0	6.97399e-05	0	0	1.7435e-05	1.7435e-05	0	8.71748e-05	6.97399e-05	0	0	0.000122045	0	0	6.97399e-05	0	0.000383569	3.48699e-05	0	3.48699e-05	0	k__Bacteria;p__Proteobacteria;c__Gammaproteobacteria;o__Burkholderiales;f__Comamonadaceae;g__Ramlibacter
OTU_1582	0	0	3.48699e-05	0	0	0	0	0	0	0	0	0	0	5.23049e-05	0	0	0	0	0	0	0	0	0	0	0	0	0	0	0	0	0	0	0	0	0	0	k__Bacteria;p__Verrucomicrobiota;c__Verrucomicrobiae;o__Chthoniobacterales;f__Chthoniobacteraceae;g__Chthoniobacter;s__
OTU_1583	0	1.7435e-05	0	0	0	0	0	0	0	0	0	1.7435e-05	0	0	0	0	0	0	0	0	0	0	0	0	0	0	0	0	0	0	0	0	0	0	0	0	k__Bacteria;p__Actinobacteriota;c__Actinobacteria;o__Micromonosporales;f__Micromonosporaceae;g__Actinocatenispora
OTU_1584	0	0	0	0	0	0	0	0	0	0	0	0	0	0	0	0	5.23049e-05	0	0	0	0	0	0	0	0	0	0	0	0	0	0	0	0	0	0	0	k__Bacteria;p__Bacteroidota;c__Bacteroidia;o__Chitinophagales;f__Chitinophagaceae;g__Pseudoflavitalea
OTU_1585	0	0	0	0	0	0	0	5.23049e-05	3.48699e-05	0	0	0	0	0	0	0	0	0	0	1.7435e-05	0	0	0	0	0	0	0	0	0	0	0	0	0	0	0	0	k__Bacteria;p__Deferribacteres;c__unidentified_Deferribacteres;o__Deferribacterales;f__Deferribacteraceae;g__Mucispirillum;s__Mucispirillum_sp_69
OTU_1586	0	0	0	0	0	0	0	0	0	0	0	0	0	0	0	0	0	0	0	0	0	0	0	0	1.7435e-05	0	0	0	0	0	1.7435e-05	0	0	1.7435e-05	0	0	k__Bacteria;p__Bacteroidota;c__Bacteroidia;o__Flavobacteriales;f__Flavobacteriaceae;g__Flavobacterium
OTU_1587	0	0	0	0	0	0	0	0	0	0	0	0	0	0	0	0	1.7435e-05	6.97399e-05	0	0	0	0	0	0	0	0	0	0	0	0	0	0	0	0	0	0	k__Bacteria;p__Proteobacteria;c__Gammaproteobacteria;o__Burkholderiales;f__Oxalobacteraceae
OTU_1588	0	0	0	0	0	3.48699e-05	0	0	0	0	1.7435e-05	0	0	0	0	0	3.48699e-05	5.23049e-05	0	0	1.7435e-05	0	0	0	0	3.48699e-05	0	0	0	0	0	3.48699e-05	0	0	0	3.48699e-05	k__Bacteria;p__unidentified_Bacteria;c__Alphaproteobacteria;o__Caulobacterales;f__Caulobacteraceae;g__;s__
OTU_1589	0	0	0	0	0	0	0	0	0	0	0	0	0	0	0	0	0	0	0	0	0	0	0	0	1.7435e-05	0	0	0	0	0	0	0	0	0	0	0	k__Bacteria;p__Proteobacteria;c__Alphaproteobacteria;o__Paracaedibacterales;f__Paracaedibacteraceae;g__Candidatus_Paracaedibacter;s__
OTU_1590	0	0	0	0	0	0	0	0	0	0	1.7435e-05	0	0	0	0	0	0	0	0	0	0	0	0	0	0	0	0	0	0	0	0	0	0	0	0	0	k__Bacteria
OTU_1591	0	0	0	0	0	0	0	0	5.23049e-05	0	0	0	0	0	0	0	0	0	0	0	0	0	0	0	0	0	0	0	0	0	0	0	0	0	0	0	k__Bacteria
OTU_1592	0	0	0	0	0	0	0	0	0	0	0	0	0	0	0	0	3.48699e-05	0	0	0	0	0	0	0	0	0	0	0	0	0	0	0	0	0	0	0	k__Bacteria;p__Proteobacteria;c__Alphaproteobacteria;o__Rhodobacterales;f__Rhodobacteraceae
OTU_1593	0	3.48699e-05	0	0	1.7435e-05	0	0	0	0	0	0	0	0	8.71748e-05	0	0	0	0	0	0	0	0	0	0	0	1.7435e-05	0	0	0	0	0	0	0	0	0	0	k__Bacteria;p__unidentified_Bacteria;c__Saccharimonadia;o__Saccharimonadales;f__Saccharimonadaceae;g__TM7a;s__
OTU_1594	0	0	0	0	0	0	0	0	0	0	0	0	0	0	0	0	0	0	0	0	0	0	0	0	0	0	1.7435e-05	0	0	0	0	0	0	0	0	0	k__Bacteria;p__Proteobacteria;c__Gammaproteobacteria;o__unidentified_Gammaproteobacteria;f__unidentified_Gammaproteobacteria;g__Acidibacter;s__
OTU_1595	0.00010461	0	0	0.00010461	0	0	0.000191785	0	0	0	3.48699e-05	1.7435e-05	0	0	5.23049e-05	0	5.23049e-05	0.00013948	0	0	8.71748e-05	3.48699e-05	3.48699e-05	0	1.7435e-05	1.7435e-05	1.7435e-05	8.71748e-05	0	6.97399e-05	0.00010461	0	1.7435e-05	0.00010461	3.48699e-05	0	k__Bacteria;p__Proteobacteria;c__Gammaproteobacteria;o__Xanthomonadales;f__Xanthomonadaceae;g__Stenotrophomonas;s__Stenotrophomonas_acidaminiphila
OTU_1596	0	0	3.48699e-05	0	0	0	0	0	0	0	0	0	0	0	1.7435e-05	0	0	0	0	0	0	0	0	0	0	0	0	0	0	0	0	0	0	0	0	0	k__Bacteria;p__Proteobacteria;c__Gammaproteobacteria;o__Burkholderiales;f__Nitrosomonadaceae;g__Nitrosomonas;s__
OTU_1597	0	0	0	0	0	0	1.7435e-05	0	0	0	0	0	0	0	0	0	0	0	0	0	0	0	0	0	0	0	0	0	0	0	0	0	0	0	0	0	k__Bacteria;p__Proteobacteria;c__Gammaproteobacteria;o__Pseudomonadales;f__Moraxellaceae;g__Acinetobacter
OTU_1598	0	0	0	0	0	0	0	0	0	0	0	0	0	0	0	0	0	5.23049e-05	0	0	0	0	0	0	3.48699e-05	0	0	0	0	0	0	0	0	0	0	0	k__Bacteria;p__Proteobacteria;c__Gammaproteobacteria;o__Burkholderiales;f__Comamonadaceae
OTU_1599	0	0	0	0	0	0	0	0	0	0	0	6.97399e-05	0	0	0	0	0	0	0	0	0	0	0	0	0	0	0	0	0	0	0	0	0	0	0	0	k__Bacteria;p__Gemmatimonadetes;c__unidentified_Gemmatimonadetes;o__Gemmatimonadales;f__Gemmatimonadaceae;g__Gemmatimonas;s__
OTU_1600	0	0	0	0	0	0	0	5.23049e-05	0	0	0	0	0	0	0	0	0	0	0	0	0	0	0	0	0	0	0	0	0	0	0	0	0	0	0	0	k__Bacteria;p__Bacteroidota;c__Bacteroidia;o__Bacteroidales;f__Prevotellaceae
OTU_1601	0	0	0	0	0	0	0	0	1.7435e-05	0	0	0	0	0	0	0	0	0	0	0	0	0	0	0	0	0	0	0	0	0	0	0	0	0	0	0	k__Bacteria;p__Bacteroidota;c__Bacteroidia;o__Bacteroidales;f__Prevotellaceae;g__Prevotellaceae_Ga6A1_group;s__
OTU_1602	0	0	0	0	0	0	0	0	0	0	0	0	0	0	0	0	0	0	0	8.71748e-05	0	0	0	0	0	0	0	0	0	0	0	0	0	0	0	0	k__Bacteria;p__unidentified_Bacteria;c__Bacilli;o__Erysipelotrichales;f__Erysipelotrichaceae;g__;s__
OTU_1603	0	0	0	0	0	0	0	0	0	0	0	0	0	0	0	0	3.48699e-05	0	0	0	0	0	0	0	0	0	0	0	0	0	0	0	0	0	0	0	k__Bacteria;p__Proteobacteria;c__Alphaproteobacteria;o__Rickettsiales;f__SM2D12;g__;s__
OTU_1604	0	0	0	0	0	0	0	0	0	0	0	0	0	0	0	0	0	0	0	0	0	0	0	0	0	0	0	0	0	1.7435e-05	0	0	0	0	1.7435e-05	0	k__Bacteria;p__Bdellovibrionota;c__Bdellovibrionia;o__Bdellovibrionales;f__Bdellovibrionaceae;g__Bdellovibrio;s__
OTU_1605	0	0	1.7435e-05	0	0	0	0	0	0	0	0	0	0	0	0	0	0	0	0	0	0	0	0	0	0	0	0	0	0	0	0	0	0	0	1.7435e-05	1.7435e-05	k__Bacteria;p__Firmicutes;c__Bacilli;o__Paenibacillales;f__Paenibacillaceae;g__Cohnella
OTU_1606	0	0	0	0	0	0	0	0	0	0	0	0	0	0	0	0	0	0	0	0	0	0	0	0	0	0	0	0	0	0	0	1.7435e-05	0	0	0	0	k__Bacteria;p__unidentified_Bacteria;c__Saccharimonadia;o__Saccharimonadales;f__Saccharimonadaceae;g__TM7a;s__
OTU_1607	0	0	0	0	0	0	0	0	0	0	0	0	0	0	0	0	0	0	0	0	0	0	0	0	5.23049e-05	0	0	0	0	0	0	0	0	0	0	0	k__Bacteria;p__Bacteroidota;c__Bacteroidia;o__Chitinophagales;f__Saprospiraceae;g__OLB8;s__
OTU_1608	1.7435e-05	0	0	1.7435e-05	0	0	5.23049e-05	0	6.97399e-05	0	0	0	0	0	0	0	0	0	0	0	0	0	0	0	0	0	0	0	0	0	0	0	0	0	0	0	k__Bacteria;p__Proteobacteria;c__Gammaproteobacteria;o__Burkholderiales;f__SC-I-84
OTU_1609	0	0	0	0	0	0	0	0	0	0	3.48699e-05	0	0	0	0	0	3.48699e-05	1.7435e-05	0	0	0	0	0	0	0	1.7435e-05	0	0	0	0	0	5.23049e-05	0	0	0	0	k__Bacteria;p__unidentified_Bacteria;c__Alphaproteobacteria
OTU_1610	0	0	0	0	0	0	0	0	0	0	0	0	0	0	0	0	0	3.48699e-05	0	0	0	0	0	0	0	0	0	0	0	0	0	0	0	0	0	0	k__Bacteria;p__Proteobacteria;c__Gammaproteobacteria;o__Burkholderiales
OTU_1611	0	5.23049e-05	0.00017435	0	0.000122045	0.00010461	0	0	0	0	0.000156915	0.000278959	0	6.97399e-05	0.000122045	0	0.000122045	6.97399e-05	0	0.000226655	0	0	0	1.7435e-05	0	0.00010461	8.71748e-05	0	0	5.23049e-05	0	0.000261525	0	0	3.48699e-05	0.000261525	k__Bacteria;p__unidentified_Bacteria;c__Alphaproteobacteria;o__Acetobacterales;f__Acetobacteraceae;g__;s__
OTU_1612	0	0	0	0	0	0	0	0	0	0	0	0	0	0	0	0	0	0	0	0	0	0	0	3.48699e-05	0	0	0	0	0	0	0	0	0	0	0	0	k__Bacteria;p__Proteobacteria;c__Alphaproteobacteria;o__Rickettsiales;f__unidentified_Rickettsiales;g__Candidatus_Jidaibacter;s__
OTU_1613	0	0	0	0	0	0	0	0	0	3.48699e-05	0	0	0	0	0	0	0	0	0	0	0	0	0	0	8.71748e-05	0	0	0	0	0	0	0	0	6.97399e-05	0	0	k__Bacteria;p__Proteobacteria;c__Alphaproteobacteria;o__Rhodobacterales;f__Rhodobacteraceae;g__Rhodobacter
OTU_1614	0	0	0	5.23049e-05	0	0	0	0	0	0	0	0	0	0	0	0	0	0	0	0	0	0	0	0	3.48699e-05	0	0	0	0	0	0	0	0	0	0	0	k__Bacteria
OTU_1615	0	0	0	0	0	0	0	0.000191785	0.000296394	0	0	0	0	0	0	0	0	0	0	0	0	0	0	0	0	0	0	0	0	0	0	0	0	0	0	0	k__Bacteria;p__Firmicutes;c__Clostridia;o__Clostridia_UCG-014;f__;g__;s__
OTU_1616	0	0	0	0	0	0	0	0	0	0	0	3.48699e-05	0	0	0	0	3.48699e-05	0	0	0	0	0	0	0	0	0	0	0	0	0	0	6.97399e-05	1.7435e-05	0	0	0	k__Bacteria;p__Cyanobacteria;c__Cyanobacteriia;o__Chloroplast;f__unidentified_Chloroplast;g__unidentified_Chloroplast
OTU_1617	0	0	0	0	0	0	0	0	0	0	0	0	0	0	0	0	0	0	0	0	0	0	0	0	0.000122045	0	0	0	0	0	0	0	0	0	0	0	k__Bacteria;p__Acidobacteriota;c__Thermoanaerobaculia;o__Thermoanaerobaculales;f__Thermoanaerobaculaceae;g__Subgroup_10
OTU_1618	0	0	0	0	0	0	0	0	0	0	0	0	0	0	0	0	0	0	0	0	0	0	0	0	6.97399e-05	0	0	0	0	0	0	0	0	0	0	0	k__Bacteria;p__Firmicutes;c__Clostridia;o__Oscillospirales;f__Oscillospiraceae;g__Colidextribacter
OTU_1619	0	0	0	0	0	0	0	0	0	0	0	0	0	0	0	0	0	0	0	0	0	0	0	0	5.23049e-05	0	0	0	0	0	0	0	0	0	0	0	k__Bacteria;p__Proteobacteria;c__Gammaproteobacteria;o__Alteromonadales;f__Shewanellaceae;g__Shewanella
OTU_1620	0	0	0	0	0	0	0	0	0	0	0	0	0	0	0	0	0	0	0	0	1.7435e-05	0	0	0	0	0	0	0	0	0	0	0	0	0	0	0	k__Bacteria;p__Armatimonadota;c__Armatimonadia;o__Armatimonadales;f__;g__;s__
OTU_1621	0	0	0	1.7435e-05	0	0	0	0	0	0	0	0	0	0	0	0	0	0	0	0	0	0	0	0	0	0	0	0	0	0	0	0	0	0	0	0	k__Bacteria;p__Proteobacteria;c__Gammaproteobacteria;o__Xanthomonadales;f__Xanthomonadaceae;g__Pseudoxanthomonas
OTU_1622	0	0	0	0	0	0.00013948	1.7435e-05	0	0	0	3.48699e-05	0	0	0	0	0	0	0	0	0	0	0	0	0	0	0	8.71748e-05	0	0	0	1.7435e-05	0	3.48699e-05	0	0	0	k__Bacteria;p__Proteobacteria;c__Gammaproteobacteria;o__Burkholderiales;f__Comamonadaceae;g__Piscinibacter;s__
OTU_1623	0	0	0	0	0	0	0	0	0	0	0	0	0	0	0	0	0	0	0	0	0	0	0	0	0	0	3.48699e-05	0	0	0	0	0	0	0	0	0	k__Bacteria;p__SAR324_clade(Marine_group_B);c__;o__;f__;g__;s__
OTU_1624	0	0	0	0	0	0	0	0	0	0	0	0	0	3.48699e-05	0	0	0	0	0	0	1.7435e-05	0	0	0	0	1.7435e-05	0	0	0	0	0	0	0	0	3.48699e-05	0	k__Bacteria;p__Acidobacteriota;c__Acidobacteriae;o__Bryobacterales;f__Bryobacteraceae;g__Bryobacter;s__
OTU_1625	0	0	0	0	0	0	0	0	0	0	0	0	0	0	0	0	0	0	0	0	0	0	0	0	0	0	0	1.7435e-05	0	0	0	0	0	0	0	0	Unknown
OTU_1626	0	0	0	0	5.23049e-05	0	0	0	0	0	0	0	0	0	0	0	0	0	0	0	0	0	0	0	0	0	0	0	0	0	0	0	0	0	0	3.48699e-05	Unknown
OTU_1627	0	0	0	0	3.48699e-05	0	0	0	0	0	0	0	0	0	0	0	0	6.97399e-05	0	0	0	0	0	1.7435e-05	0	0	0	0	0	0	0	0	0	0	0	0	k__Bacteria;p__Proteobacteria;c__Alphaproteobacteria;o__Dongiales;f__Dongiaceae;g__Dongia;s__
OTU_1628	0	0	0	0	1.7435e-05	3.48699e-05	0	0	0	0	0	0	1.7435e-05	0	0	0	0	0	0	0	1.7435e-05	0	0	3.48699e-05	0	1.7435e-05	5.23049e-05	0	0	3.48699e-05	0	0	0	0	1.7435e-05	0	k__Bacteria;p__Chloroflexi;c__KD4-96;o__;f__;g__;s__
OTU_1629	0	0.00024409	3.48699e-05	0	0.000191785	1.7435e-05	0	0	0	0	3.48699e-05	5.23049e-05	0	0.000278959	0.00017435	0	6.97399e-05	0	0	0	0.000122045	0	0.000383569	0.000278959	0	0.000348699	0	0	3.48699e-05	0.000261525	0	0.00020922	0.000366134	0	1.7435e-05	5.23049e-05	k__Bacteria;p__Actinobacteriota;c__Actinobacteria;o__Micrococcales;f__Intrasporangiaceae;g__Terrabacter;s__Terrabacter_sp
OTU_1630	0	0	1.7435e-05	0	0	3.48699e-05	0	0	0	0	0	0	0	0	0	0	0	0	0	0	0	0	0	0	0	0	0	0	5.23049e-05	0	0	0	0	0	1.7435e-05	0	k__Bacteria;p__Proteobacteria;c__Alphaproteobacteria;o__Paracaedibacterales;f__Paracaedibacteraceae;g__Candidatus_Paracaedibacter;s__
OTU_1631	0	0	0	0	0	0	0	0	0	0	0	0	8.71748e-05	0	0	0	0	0	0	0	0	0	0	0	0	0	0	0	0	0	0	0	0	0	0	0	k__Bacteria;p__Proteobacteria;c__Gammaproteobacteria;o__Burkholderiales;f__TRA3-20;g__;s__
OTU_1632	0	0	0	0	0	0	0	0	0	0	0	0	0	0	0	0	0	3.48699e-05	0	0	0	0	0	0	0	0	0	0	0	0	0	0	0	0	0	0	k__Bacteria;p__unidentified_Bacteria;c__Vicinamibacteria;o__Vicinamibacterales;f__;g__;s__
OTU_1633	0	0	3.48699e-05	0	0	0	0	0	0	0	0	0	0	0	0	0	0	0	0	1.7435e-05	0	0	1.7435e-05	0	0	1.7435e-05	0	0	0	0	0	0	0	0	0	0	k__Bacteria;p__Bacteroidota;c__Bacteroidia;o__Chitinophagales;f__Chitinophagaceae;g__Edaphobaculum;s__
OTU_1634	0	0	0	0	0	0	0	0	0	0	0	0	3.48699e-05	0	0	0	0	0	0	0	0	0	0	0	0	0	0	0	0	0	0	0	0	0	0	0	k__Bacteria
OTU_1635	0	0	3.48699e-05	0	1.7435e-05	0	0	0	0	0	0	0	0	0	0	0	0	3.48699e-05	0	3.48699e-05	0	0	0	0	0	3.48699e-05	0	0	0	0	0	0	0	0	0	0	k__Bacteria;p__Proteobacteria;c__Gammaproteobacteria;o__WD260;f__;g__;s__
OTU_1636	0	0	0	0	0	0	0	0	0	0	0	6.97399e-05	0	0	0	0	0	0	0	0	0	0	0	1.7435e-05	0	6.97399e-05	0	0	0	0	0	1.7435e-05	0	0	0	0	k__Bacteria;p__Proteobacteria;c__Gammaproteobacteria;o__Xanthomonadales;f__Rhodanobacteraceae;g__Dokdonella;s__
OTU_1637	0	0	0	0	0	0	0	0.00013948	0.000313829	0	0	0	5.23049e-05	0	0	0	0	0	0	0	0	0	0	0	0	0	0	0	0	0	0	0	0	0	0	0	k__Bacteria;p__Firmicutes;c__Clostridia;o__Oscillospirales;f__Oscillospiraceae
OTU_1638	0	0	0	0	0	0	0	0	0	0	0	0	0	0	0	0	0	0	0	1.7435e-05	0	0	0	0	0	0	0	0	0	0	0	0	0	0	0	0	Unknown
OTU_1639	0	0	0	0.00010461	0	0	0	0	0	0	0	0	0	0	0	0	0	0	0	0	0	0	0	0	0	0	0	0	0	0	0	0	0	0	0	0	k__Bacteria;p__Proteobacteria;c__Gammaproteobacteria;o__Enterobacterales;f__Enterobacteriaceae;g__Escherichia-Shigella
OTU_1640	3.48699e-05	0	0	0	0	1.7435e-05	0	0	0	0	0	0	0	0	0	0	1.7435e-05	0	0	0	0	0	0	0	6.97399e-05	0	0	0	0	0	0	0	0	0	0	0	k__Bacteria;p__unidentified_Bacteria;c__Gammaproteobacteria;o__Steroidobacterales;f__Steroidobacteraceae;g__;s__
OTU_1641	0	0	5.23049e-05	0	0	0	0	0	0	0	0	0	0	0	1.7435e-05	0	0	0	0	0	0	0	0	0	0	0	0	0	0	1.7435e-05	0	0	0	0	0	0	k__Bacteria;p__Firmicutes;c__Bacilli;o__Erysipelotrichales;f__Erysipelotrichaceae;g__Faecalicoccus
OTU_1642	0	0	0	0	0	0	0	1.7435e-05	0	0	0	0	0	0	0	0	0	0	0	0	0	0	0	0	0	0	0	0	0	0	0	0	0	0	0	0	k__Bacteria;p__Bacteroidota;c__Bacteroidia;o__Bacteroidales;f__Muribaculaceae;g__;s__
OTU_1643	0	0	0	0	0	0	0	0	0	0	1.7435e-05	0	0	0	0	0	6.97399e-05	0	0	0	5.23049e-05	0	0	0	0	0	0	0	0	0	0	0	0	0	0	0	k__Bacteria;p__Proteobacteria;c__Gammaproteobacteria;o__Enterobacterales;f__Morganellaceae;g__Buchnera;s__
OTU_1644	0	0	0	0	0	0	0	0.00024409	5.23049e-05	0	0	0	0	0	0	0	0	0	0	0	0	0	0	0	0	0	0	0	0	0	0	0	0	0	0	0	k__Bacteria;p__Firmicutes;c__Clostridia;o__Lachnospirales;f__Lachnospiraceae
OTU_1645	0	0	0	0	0	0	0	0	0	0	0	1.7435e-05	0	0	0	0	3.48699e-05	0	0	0	0	0	0	0	0	0	0	0	0	0	0	0	0	0	0	3.48699e-05	k__Bacteria;p__unidentified_Bacteria;c__Polyangia;o__Polyangiales;f__Sandaracinaceae;g__;s__
OTU_1646	0	0	0	0	0	0	0	0	0	0	3.48699e-05	0	0	0	0	0	0	0	0	0	0	0	0	0	0	0	0	0	0	0	0	0	0	0	5.23049e-05	0	k__Bacteria;p__Bacteroidota;c__Bacteroidia;o__Bacteroidales;f__Muribaculaceae
OTU_1647	0	0	0	0	0	0	0	0	0	3.48699e-05	0	0	0	0	0	0	0	0	0	0	0	0	0	0	0	0	0	0	0	1.7435e-05	0	0	0	0	0	0	k__Bacteria;p__Acidobacteriota;c__Acidobacteriae;o__Bryobacterales;f__Bryobacteraceae;g__Bryobacter;s__
OTU_1648	0	0	0	0	0	0	0	0	0	0	0	0	0	0	0	0	0	0	0	0	0	0	0	0	0	0	0	0	0	0	0	0	0	0	1.7435e-05	0	k__Bacteria;p__unidentified_Bacteria;c__Thermoleophilia;o__Gaiellales;f__;g__;s__
OTU_1649	0	0	0	0	0	0	0	0	0	0	0	0	0	0	0	0	0	0	0	0	0	0	0	0	0	0	0	0	0	0	0	0	0	0	3.48699e-05	0	k__Bacteria;p__Firmicutes;c__Clostridia;o__Lachnospirales;f__Lachnospiraceae;g__Acetitomaculum;s__
OTU_1650	0	0	0	0	0	0	0	0	0	0	0	0	0	0	0	0	0	0	0	0	0	0	0	0	0	0	0	0	0	0	0	0	0	0	0	8.71748e-05	k__Bacteria;p__Proteobacteria;c__Alphaproteobacteria;o__Rickettsiales;f__SM2D12;g__;s__
OTU_1651	0	0	0	0	0	0	0	0	0	0	0	0	0	0	0	0	0	0	0	0	0	0	0	0	0	0	0	0	0	0	0	0	0	0	6.97399e-05	0	k__Bacteria;p__Proteobacteria;c__Alphaproteobacteria;o__Rickettsiales;f__SM2D12;g__;s__
OTU_1652	0	0	0	0	0	0	0	0	0	0	0	1.7435e-05	0	0	0	0	0	0	0	0	0	0	0	0	0	0	0	0	0	0	0	0	0	0	0	1.7435e-05	k__Bacteria;p__Firmicutes;c__Desulfitobacteriia;o__Desulfitobacteriales;f__Desulfitobacteriaceae;g__Desulfosporosinus
OTU_1653	0	0	0	0	0	0	0	1.7435e-05	3.48699e-05	0	0	0	0	0	0	0	0	0	0	0	0	0	0	0	0	0	0	0	0	0	0	0	0	0	0	0	k__Bacteria;p__unidentified_Bacteria;c__Clostridia;o__Lachnospirales;f__Lachnospiraceae;g__;s__
OTU_1654	0	0	0	0	0	0	0	0	0	0	0	0	0	0	0	0	0	0	0	0	0	0	0	0	0	0	0	0	0	0	0	0	3.48699e-05	0	0	0	k__Bacteria;p__Actinobacteriota
OTU_1655	0	0	0	0	0	0	0	0	0	0	0	0	1.7435e-05	0	0	0	0	0	0	0	0	0	0	0	0	0	0	0	0	0	0	0	0	0	0	0	k__Bacteria
OTU_1656	0	0	0	5.23049e-05	0	0	0	0	0	0	0	0	0	0	0	0	0	0	0	0	0	0	0	0	0	0	0	0	0	0	0	0	0	0	0	0	k__Bacteria;p__Bacteroidota;c__Bacteroidia;o__Flavobacteriales;f__Flavobacteriaceae;g__Flavobacterium
OTU_1657	0	0	0	0	0	0	0	0	0	0	0	5.23049e-05	0	0	3.48699e-05	0	0	0	0	0	0	0	0	0	0	0	0	0	0	0	0	5.23049e-05	0	0	5.23049e-05	1.7435e-05	k__Bacteria
OTU_1658	0	0	0	0	0	0	0	0	0	0	0	0	0	0	5.23049e-05	0	0	0	0	0	0	0	0	0	0	0	0	0	1.7435e-05	0	0	0	0	0	0	0	k__Bacteria;p__Bdellovibrionota;c__Bdellovibrionia;o__Bdellovibrionales;f__Bdellovibrionaceae;g__Bdellovibrio
OTU_1659	0	0	0	0	0	0	0	0	0	0	0	0	5.23049e-05	0	0	0	0	0	0	0	0	0	0	0	0	0	0	0	0	0	0	0	0	0	0	0	k__Bacteria;p__Firmicutes;c__Clostridia;o__Lachnospirales;f__Lachnospiraceae
OTU_1660	0	0	0	0	0	0	0	0	0	0	0	0	0	0	0	0	0	0	0	0	0	0	0	0	0	0	0	0	0	0	0	0	0	3.48699e-05	0	0	k__Bacteria;p__unidentified_Bacteria;c__Alphaproteobacteria;o__Acetobacterales;f__Acetobacteraceae;g__;s__
OTU_1661	0	0	0	0	0	0	0	8.71748e-05	0	0	0	0	0	0	0	0	0	0	0	0	0	0	0	0	0	0	0	0	0	0	3.48699e-05	0	0	0	0	0	Unknown
OTU_1662	8.71748e-05	0	0	0	0	0	0	0	0	0	0	0	0	0	0	0	0	0	0	0	0	0	0	0	0	0	0	0	0	0	0	6.97399e-05	0	0	0	0	k__Bacteria;p__unidentified_Bacteria;c__Saccharimonadia;o__Saccharimonadales
OTU_1663	0	0	0	0	0	0	0	0	0	0	0	0	0	0	0	0	0	3.48699e-05	0	0	0	0	0	0	0	0	0	0	0	0	0	0	0	0	0	0	Unknown
OTU_1664	0	0	0	0	0	0	0	0	0	0	0	0	0	0	0	0	0	0	0	0	0	0	0	0	0	0	0	0	0	0	0	0	0	0	0	3.48699e-05	k__Bacteria;p__Firmicutes;c__Bacilli;o__Paenibacillales;f__Paenibacillaceae;g__Paenibacillus
OTU_1665	0	0	0	0	0	3.48699e-05	0	0	0	0	0	0	0	0	0	0	0	0	0	0	0	0	0	0	0	0	0	0	0	0	0	0	0	0	0	0	k__Bacteria;p__WPS-2;c__;o__;f__;g__;s__
OTU_1666	0	0	0	0	0	0	0	0	0	0	3.48699e-05	0	0	0	0	0	0	0	0	0	0	0	0	0	0	0	0	0	0	0	0	0	0	0	0	0	k__Bacteria
OTU_1667	0	0	8.71748e-05	3.48699e-05	0	0	0	0	0	0.000156915	0.000191785	0	0	0	8.71748e-05	0	1.7435e-05	1.7435e-05	0	0	0	0	6.97399e-05	1.7435e-05	0.000296394	0	0	0.000122045	0	0	0.00024409	0	5.23049e-05	0.00013948	0.000156915	1.7435e-05	k__Bacteria;p__Proteobacteria;c__Gammaproteobacteria;o__Xanthomonadales;f__Xanthomonadaceae;g__Thermomonas;s__
OTU_1668	0	0	0	0	0	0	0.00010461	0	0	0	0	0	0	0	0	0	0	0	0	0	0	0	0	0	0.00013948	0	0	0	0	0	0	0	0	0	1.7435e-05	0	k__Bacteria;p__Bacteroidota;c__Bacteroidia;o__Bacteroidales;f__Bacteroidaceae;g__Bacteroides;s__Bacteroides_fragilis
OTU_1669	0	0	0	0	0	0	0	0	0	0	0	0	0	0	0	0	0	0	0	0	0	0	0	0	0	0	0	0	0	0	0	6.97399e-05	0	0	0	0	k__Bacteria
OTU_1670	0	0	0	0	0	0	0	0	0	0	0	0	3.48699e-05	0	0	0	1.7435e-05	1.7435e-05	0	0	0	0	0	0	0	0	5.23049e-05	0	0	0	0	0	0	0	0	0	k__Bacteria;p__unidentified_Bacteria;c__Alphaproteobacteria;o__Rhodospirillales;f__Magnetospiraceae;g__;s__
OTU_1671	0	0	0	0	0	0	0	0	0	0	0	0	0	0	0	0	0	6.97399e-05	0	0	0	0	0	0	0	0	0	0	0	0	0	0	0	0	0	0	k__Bacteria;p__unidentified_Bacteria;c__Bacteroidia;o__Cytophagales;f__Microscillaceae;g__unidentified_Microscillaceae
OTU_1672	0	0	0	0	0	0	0	0	0	0	0	0	0	0	0	0	0	0	0	0	0	0	0	0	8.71748e-05	0	0	0	0	0	0	0	0	0	0	0	k__Bacteria
OTU_1673	0	0	0	0	0	0	0	0	0	0	0	0	0	0	0	0	3.48699e-05	0	0	0	0	0	0	0	0	0	0	0	0	0	0	0	0	0	0	0	k__Bacteria;p__unidentified_Bacteria;c__Acidimicrobiia;o__Microtrichales;f__Ilumatobacteraceae;g__;s__
OTU_1674	0	0	0	0	0	0	3.48699e-05	0	0	0	0	0	0	0	0	0	0	0	0	0	0	0	0	0	0	0	0	0	0	0	0	0	0	0	0	0	k__Bacteria;p__Proteobacteria
OTU_1675	0	0	0	0	0	0	0	0	0	0	0	0	0	0	0	0	0	0	0	0	0	0	0	0	5.23049e-05	0	0	0	0	0	0	0	0	0	0	0	k__Bacteria;p__Proteobacteria;c__Gammaproteobacteria;o__Burkholderiales;f__Sutterellaceae;g__AAP99;s__
OTU_1676	0	0	0	0	0	0	0	0	0	0	0	0	0	0	0	0	0	0	0	0	0	0	0	3.48699e-05	0	0	0	0	0	0	0	0	0	0	0	0	k__Bacteria;p__Proteobacteria;c__Alphaproteobacteria;o__Acetobacterales;f__Acetobacteraceae
OTU_1677	0	0	6.97399e-05	0	5.23049e-05	3.48699e-05	0	0	0	0	0	5.23049e-05	0	0	0	0	0	0	0	0	0	0	0	0	0	0	0	0	0	5.23049e-05	0	0	0	0	6.97399e-05	0.00210963	k__Bacteria;p__Cyanobacteria;c__Cyanobacteriia;o__Chloroplast;f__unidentified_Chloroplast;g__unidentified_Chloroplast;s__Drosera_regia
OTU_1678	0	0	0	0	0	0	0	0	0	0	3.48699e-05	0	0	0	0	0	0	0	0	0	0	0	0	0	0	0	0	0	0	0	0	0	0	0	0	0	k__Bacteria;p__unidentified_Bacteria;c__unidentified_Bacteria;o__Gemmatimonadales;f__Gemmatimonadaceae;g__;s__
OTU_1679	0	0	0	0	0	0	0	0	0	0	0	0	0	0	0	0	0	0	0	0	0	0	0	0	0	0	0	0	0	0	0	0	0	0	0	8.71748e-05	k__Bacteria;p__Gemmatimonadetes;c__unidentified_Gemmatimonadetes;o__Gemmatimonadales;f__Gemmatimonadaceae;g__Gemmatimonas;s__
OTU_1680	0	0	0	0	0	0	0	0	0	0	0	0	0	0	0	0	0	0	0	0	0	0	1.7435e-05	0	0	0	0	0	0	0	0	0	0	0	0	0	k__Bacteria
OTU_1681	0	0	0	0	0	0	0	0	0	0	0	3.48699e-05	0	0	0	0	1.7435e-05	0	0	0	0	0	0	0	0	0	0	0	0	0	0	0	0	0	0	0	k__Bacteria;p__Proteobacteria;c__Gammaproteobacteria;o__Legionellales;f__Legionellaceae;g__Legionella
OTU_1682	0	0	0	0	0	3.48699e-05	0	0	0	0	0	6.97399e-05	0	5.23049e-05	0	0	0	3.48699e-05	0	0	0	0	0	1.7435e-05	0	0	0	0	0	0	0	5.23049e-05	0	0	0	5.23049e-05	k__Bacteria;p__Actinobacteriota;c__Actinobacteria;o__Corynebacteriales;f__Mycobacteriaceae;g__Mycobacterium
OTU_1683	0	0	0	0	0	0	0	0	0	0	0	0	0	0	0	0	0	0	0	0	0	0	0	0	0	0	0	0	0	0	6.97399e-05	0	0	0	0	0	k__Bacteria;p__Proteobacteria;c__Gammaproteobacteria;o__Burkholderiales;f__Nitrosomonadaceae;g__Nitrosomonas;s__
OTU_1684	0	0	0	0	0	0	0	0	0	0	0	0	0	0	0	0	0	6.97399e-05	0	0	0	0	0	0	0	0	0	0	0	0	0	0	0	0	0	0	k__Bacteria;p__Sumerlaeota;c__Sumerlaeia;o__Sumerlaeales;f__Sumerlaeaceae;g__Sumerlaea;s__
OTU_1685	0	0	0	3.48699e-05	0	0	0	0	0	0	0	0	0	0	0	0	0	0	0	0	0	0	0	0	0	0	0	1.7435e-05	0	0	0	0	0	0	0	0	k__Bacteria;p__Proteobacteria;c__Gammaproteobacteria;o__Aeromonadales;f__Aeromonadaceae;g__Aeromonas
OTU_1686	0	0	3.48699e-05	0	0	0	0	0	0	0	1.7435e-05	0	0	0	1.7435e-05	0	0	0	0	0	0	0	0	0	0	0	3.48699e-05	0	0	0	0	0	0	0	1.7435e-05	0	k__Bacteria;p__Chloroflexi;c__Anaerolineae;o__SBR1031;f__A4b;g__;s__
OTU_1687	0	0	1.7435e-05	0	0	0	0	0	0	0	0	0	0	0	0	0	0	0	0	0	0	0	0	0	0	0	0	0	0	0	0	0	0	0	0	0	k__Bacteria;p__Bacteroidota;c__Bacteroidia;o__Sphingobacteriales;f__env.OPS_17;g__;s__
OTU_1688	0	0	0	0	0	0	0	0	0	0	0	0	0	0	0	0	0	3.48699e-05	0	0	0	0	0	0	0	0	0	0	0	0	0	1.7435e-05	0	0	0	0	k__Bacteria;p__unidentified_Bacteria;c__Bacteroidia;o__Cytophagales;f__Microscillaceae
OTU_1689	0	0	0	0	0	3.48699e-05	0	0	0	0	0	0	0	1.7435e-05	0	0	0	0	0	0	0	0	0	0	0	5.23049e-05	0	0	0	0	0	0	0	0	0	0	k__Bacteria;p__Acidobacteriota;c__Acidobacteriae;o__Bryobacterales;f__Bryobacteraceae;g__Bryobacter;s__
OTU_1690	0	0	0	0	0	0	0	0	0	0	0	0	0	3.48699e-05	0	0	0	0	0	0	0	0	0	0	0	0	1.7435e-05	0	0	0	0	0	0	0	0	0	k__Bacteria;p__Actinobacteriota;c__Actinobacteria;o__Frankiales;f__Sporichthyaceae;g__Longivirga;s__
OTU_1691	0	0	0	0	3.48699e-05	1.7435e-05	0	0	0	0	0	0	0	0	0	0	0	0	0	0	0	0	0	0	0	0	3.48699e-05	0	0	0	0	0	0	0	0	0	k__Bacteria;p__Acidobacteriota;c__Vicinamibacteria;o__Vicinamibacterales;f__Vicinamibacteraceae;g__;s__
OTU_1692	0	0	0	0	0	0	0	0	0	0	0	0	0	0	0	0	0	0	0	0	0	0	0	1.7435e-05	0	0	0	0	0	0	0	3.48699e-05	0	0	0	0	k__Bacteria;p__Actinobacteriota;c__Thermoleophilia;o__Solirubrobacterales;f__Solirubrobacteraceae;g__Conexibacter;s__
OTU_1693	0	0	0	0	0	0	0	0	0	0	0	0	0	0	0	0	0	0	0	0	0	0	0	0	0	0	0	0	0	0	0	0	0	0	3.48699e-05	0	k__Bacteria;p__Proteobacteria;c__Gammaproteobacteria
OTU_1694	0.00017435	0.00024409	0.000261525	0.000261525	0.000278959	0.000226655	0.00024409	0.00024409	0.000122045	0.00010461	0.00013948	0.00020922	6.97399e-05	0.00017435	0.000348699	0.000278959	0.000226655	0.00013948	0.000331264	0.000313829	0.000156915	0.000226655	0.000348699	0.000313829	0.000226655	0.000366134	0.000296394	5.23049e-05	0.00017435	0.00013948	0.000156915	8.71748e-05	0.00020922	0.00013948	0.00013948	0.000226655	k__Bacteria;p__Proteobacteria;c__Gammaproteobacteria;o__Enterobacterales;f__Enterobacteriaceae;g__Escherichia-Shigella;s__Klebsiella_oxytoca
OTU_1695	0	0	0	0	0	0	5.23049e-05	0	0	0	0	0	0	0	0	0	0	0	0	0	0	0	0	0	1.7435e-05	0	0	0	0	1.7435e-05	0	0	0	0	0	0	k__Bacteria
OTU_1696	0	0	0	0	0	0	8.71748e-05	0	0	3.48699e-05	0	0	0	0	0	0	0	0	0	0	0	0	0	0	0	0	0	0	0	0	0	0	0	0	0	0	k__Bacteria;p__Firmicutes;c__Bacilli;o__RF39;f__;g__;s__
OTU_1697	0	0	0	0	0	0	3.48699e-05	0	0	0	0	0	0	0	0	0	0	0	0	0	0	0	0	0	0	0	0	0	0	0	0	0	0	0	0	0	k__Bacteria
OTU_1698	0	0	0	0	0	0	0	0	0	0	0	0	0	0	0	0	0	0	0	0	0	0	0	0	0	0	0	3.48699e-05	0	0	0	0	0	0	0	0	k__Bacteria;p__unidentified_Bacteria;c__Oligoflexia;o__Oligoflexales;f__;g__;s__
OTU_1699	0	0	0	0	0	0	0	0	0	0	0	0	0	0	0	0	0	0	0	0	0	0	0	0	0	0	0	0	0	0	0	0	0	0	0	3.48699e-05	k__Bacteria;p__Bacteroidota;c__Bacteroidia;o__Chitinophagales;f__Chitinophagaceae;g__Edaphobaculum;s__
OTU_1700	0	0	0	0	0	0	0	8.71748e-05	0	0	0	0	0	0	0	0	0	0	0	0	0	0	0	0	0	0	0	0	0	0	0	0	0	0	0	0	k__Bacteria
OTU_1701	0	0	0	0	0	0	0	0	1.7435e-05	0	0	0	0	0	0	0	0	0	0	0	0	0	0	0	0	0	0	0	0	0	0	0	0	0	0	0	k__Bacteria
OTU_1702	0	0	0	0	0	0	0	0.000122045	3.48699e-05	0	0	0	0	0	0	0	0	0	0	0	0	0	0	0	0	0	0	0	0	0	0	0	0	0	0	0	k__Bacteria;p__Bacteroidota;c__Bacteroidia;o__Bacteroidales;f__Rikenellaceae;g__Rikenellaceae_RC9_gut_group;s__
OTU_1703	0	0	0	0	0	0	0	0	0	0	0	0	0	1.7435e-05	0	0	0	3.48699e-05	0	0	0	0	1.7435e-05	1.7435e-05	0	0	0	0	0	0	0	0	0	0	0	0	k__Bacteria;p__unidentified_Bacteria;c__Acidimicrobiia;o__Microtrichales;f__;g__;s__
OTU_1704	0	0	0	0	0	0	0	0	0	0	0	0	0	0	0	0	3.48699e-05	0	0	0	0	0	0	0	0	0	0	0	0	0	0	0	0	0	0	0	k__Bacteria
OTU_1705	0	0	0	0	0	0	0	0	0	0	0	0	0	0	0	0	0	0	0	0	0	0	0	0	0	0	5.23049e-05	0	0	0	0	0	0	0	3.48699e-05	0	k__Bacteria;p__Proteobacteria;c__Gammaproteobacteria;o__KF-JG30-C25;f__;g__;s__
OTU_1706	0	0	0	0	0	0	0	0	0	0	0	0	0	0	0	0	0	0	0	0	0	0	0	0	0	0	1.7435e-05	0	0	0	0	0	0	0	6.97399e-05	0	k__Bacteria;p__WPS-2;c__;o__;f__;g__;s__
OTU_1707	0	0	0	0	0	0	0	0	0	0	0	0	0	0	0	0	5.23049e-05	0	0	0	0	0	0	0	0	0	0	0	0	0	0	0	0	0	0	0	k__Bacteria
OTU_1708	0	0	0	0	0	0	0	0	0	0	5.23049e-05	3.48699e-05	0	0	0	0	0	0	0	0	0	0	0	0	0	0	0	0	0	0	0	0	0	0	0	0	k__Bacteria;p__Acidobacteriota;c__Acidobacteriae;o__Acidobacteriales;f__Acidobacteriaceae_(Subgroup_1);g__Bryocella;s__
OTU_1709	0	0	0	0	0	0	0	0	0	0	0	0	0	0	0	0	0	0	0	1.7435e-05	0	0	0	0	0	0	0	0	0	0	0	0	0	0	0	0	k__Bacteria;p__Cyanobacteria;c__Vampirivibrionia;o__Gastranaerophilales;f__;g__;s__
OTU_1710	0	1.7435e-05	0	0	0	0	0	0	0	0	0	0	0	0	0	0	0	0	0	0	0	0	0	3.48699e-05	0	0	0	0	0	1.7435e-05	0	0	0	0	0	0	k__Bacteria;p__Myxococcota;c__Polyangia;o__mle1-27;f__;g__;s__
OTU_1711	0	3.48699e-05	0	0	0	0	0	0	0	0	0	0	0	0	0	0	0	0	0	0	0	0	0	0	0	0	0	0	0	0	0	0	0	0	0	0	k__Bacteria;p__Firmicutes;c__Bacilli;o__Thermoactinomycetales;f__Thermoactinomycetaceae;g__Thermoactinomyces;s__
OTU_1712	0	0	0	0	0	3.48699e-05	0	0	0	0	0	0	0	0	0	0	0	0	0	0	0	0	0	0	0	0	0	0	0	0	0	0	0	0	0	0	k__Bacteria;p__Proteobacteria;c__Gammaproteobacteria;o__Xanthomonadales;f__Rhodanobacteraceae
OTU_1713	0	0	0	0	3.48699e-05	0	0	0	0	0	5.23049e-05	1.7435e-05	0	0	1.7435e-05	0	0	0	0	3.48699e-05	0	0	0	0	0	0	1.7435e-05	0	0	0	0	0	0	0	1.7435e-05	0	k__Bacteria;p__Actinobacteriota;c__Acidimicrobiia;o__IMCC26256;f__unidentified_IMCC26256;g__unidentified_IMCC26256
OTU_1714	0	0	0	0	5.23049e-05	0	0	0	0	0	0	0	0	0	0	0	0	6.97399e-05	0	0	0	0	0	3.48699e-05	0	0	0	0	0	1.7435e-05	0	0	0	0	0	0	k__Bacteria;p__Bacteroidota;c__Bacteroidia;o__Chitinophagales;f__Chitinophagaceae;g__Edaphobaculum;s__bacterium
OTU_1715	0	0	0	0	0	0	0	0	0	0	0	0	0	0	0	0	0	0	0	0	0	0	0	0	0	0	0	0	0	0	0	0	0	0	0	0	k__Bacteria;p__unidentified_Bacteria;c__Saccharimonadia;o__Saccharimonadales
OTU_1716	0	0	0	0	0	0	0	0	0	0	0	0	0	0	1.7435e-05	0	3.48699e-05	0	0	0	0	0	0	0	0	0	0	0	0	0	0	0	0	0	1.7435e-05	0	k__Bacteria;p__Myxococcota;c__Polyangia;o__Polyangiales;f__Sandaracinaceae;g__Sandaracinus;s__
OTU_1717	3.48699e-05	0	0	0	0	0	1.7435e-05	0	0	0	0	0	0	0	0	0	0	0	0	0	0	0	0	0	3.48699e-05	1.7435e-05	0	0	0	0	1.7435e-05	0	0	3.48699e-05	0	6.97399e-05	k__Bacteria;p__Firmicutes;c__Clostridia;o__Peptostreptococcales-Tissierellales;f__Peptostreptococcaceae;g__Terrisporobacter;s__
OTU_1718	0	0	0	0	0	0	0	0	0	0	0	0	0	0	0	0	0	0	0	0	0	0	0	0	0	0	0	0	0	0	0	0	0	0	1.7435e-05	0	k__Bacteria;p__Firmicutes;c__Bacilli;o__Bacillales;f__Planococcaceae;g__Sporosarcina
OTU_1719	3.48699e-05	0	0	0	0	0	0	0	0	0	0	0	0	0	0	0	0	0	0	0	0	0	0	0	1.7435e-05	0	0	1.7435e-05	0	0	0	0	0	0	0	0	k__Bacteria;p__unidentified_Bacteria;c__Gammaproteobacteria;o__Xanthomonadales;f__Rhodanobacteraceae;g__;s__
OTU_1720	0	0	0	0	0	0	0	0	0	0	0	0	0	0	0	0	5.23049e-05	5.23049e-05	0	0	0	0	0	0	0	0	0	0	0	0	0	0	0	0	0	0	k__Bacteria;p__Bdellovibrionota;c__Bdellovibrionia;o__Bdellovibrionales;f__Bdellovibrionaceae;g__;s__
OTU_1721	0	0	0	0	0	0	0	0	0	0	0	3.48699e-05	0	0	0	0	0	0	0	0	0	0	0	0	0	0	0	0	0	0	0	0	0	0	0	0	k__Bacteria;p__Firmicutes;c__Bacilli;o__Bacillales;f__Bacillaceae;g__Bacillus
OTU_1722	0	0	0	0	0	0	0	0	0	0	0	0	0	0	0	0	0	0	0	0	0	0	0	0	0	0	0	0	0	0	6.97399e-05	0	0	0	0	0	k__Bacteria;p__unidentified_Bacteria;c__Saccharimonadia;o__Saccharimonadales;f__;g__;s__
OTU_1723	0	0	0	0	0	1.7435e-05	0	0	0	0	0	0	5.23049e-05	0	0	0	0	0	0	0	0	0	0	0	0	0	0	0	0	0	0	0	0	0	0	0	k__Bacteria;p__Proteobacteria;c__Alphaproteobacteria;o__Tistrellales;f__Geminicoccaceae;g__Candidatus_Alysiosphaera;s__
OTU_1724	0	0	0	0	0	1.7435e-05	0	0	0	0	0	0	0	0	0	0	0	0	0	0	0	0	0	0	0	0	0	0	0	0	0	0	0	0	0	0	k__Bacteria;p__Firmicutes;c__Clostridia;o__Clostridiales
OTU_1725	0	6.97399e-05	5.23049e-05	0	0.000122045	5.23049e-05	0	0	0	0	3.48699e-05	0	0	6.97399e-05	0.00010461	0	0.00010461	0.00010461	0	5.23049e-05	0	0	1.7435e-05	6.97399e-05	0	0	5.23049e-05	5.23049e-05	5.23049e-05	5.23049e-05	0	0.000784574	6.97399e-05	0	0	3.48699e-05	k__Bacteria;p__Actinobacteriota;c__Actinobacteria;o__Micrococcales;f__Microbacteriaceae;g__Agrococcus;s__Agrococcus_jejuensis
OTU_1726	0	0	1.7435e-05	0	0	0	0	0	0	0	0	0	5.23049e-05	0	1.7435e-05	0	0	0	0	0	0	0	1.7435e-05	0	0	0	0	0	0	0	0	0	0	0	0	0	k__Bacteria;p__Actinobacteriota;c__Acidimicrobiia
OTU_1727	0	0	0	0	0	0	0	0	0	0	0	0	6.97399e-05	0	0	0	0	0	0	0	0	0	0	0	0	0	0	0	0	0	0	0	0	0	0	0	k__Bacteria;p__unidentified_Bacteria;c__Alphaproteobacteria;o__;f__;g__;s__
OTU_1728	0	0	0	0	0	0	0	0	0	0	3.48699e-05	0	1.7435e-05	0	0	0	0	0	0	0	0	0	0	0	0	0	0	0	0	0	0	0	1.7435e-05	0	0	0	k__Bacteria;p__Gemmatimonadota;c__BD2-11_terrestrial_group;o__;f__;g__;s__
OTU_1729	5.23049e-05	0	0	0.000662529	0	0	5.23049e-05	0.000505614	8.71748e-05	0	0	0	0	0	0	0	0.000366134	0	0	0.000156915	0	0	0	0	0.000505614	0	0	0.00010461	0	0	1.7435e-05	0.00010461	0	0.000523049	0	0	k__Bacteria
OTU_1730	0	0	0	0	0	0	0	0	0	0	0	0	3.48699e-05	0	0	0	0	0	0	0	0	0	0	0	0	0	0	0	0	0	0	0	0	0	0	0	k__Bacteria
OTU_1731	0	0	0	0	0	0	0	0	6.97399e-05	0	0	0	0	0	0	0	0	0	0	0	0	0	0	0	0	0	0	0	0	0	0	0	0	0	0	0	k__Bacteria
OTU_1732	0	0	0	0	0	0	0	0	0	0	0	0	1.7435e-05	0	0	0	0	0	0	0	0	0	0	0	0	0	0	0	0	0	0	0	0	0	0	0	k__Bacteria;p__Planctomycetota;c__OM190;o__;f__;g__;s__
OTU_1733	0	0	0	0	0	0	0	0	0	0	0	0	0	0	0	0	0	0	0	0	0	0	0	0	0	0	0	0	0	0	3.48699e-05	0	0	0	0	0	k__Bacteria
[truncated: 272 more rows]

## Sheet: Table S3
Table S3 Post-hoc pairwise comparison of Shannon diversity metrics between mating groups by LSD test
[truncated: 14 more rows]

## Sheet: Table S4
Table S4 Post-hoc pairwise comparison of Shannon diversity metrics between mating treatments by LSD test
[truncated: 134 more rows]

[truncated: 6 more sheets: Table S5, Table S6, Table S7, Table S8, Table S9, Table S10]
